# Supplementary material
Source: HighWire-hosted journal article supplement (doi:10.1101/rna.076513.120)
Supplement: Supplemental_Figure_Legends__.docx [file Supplemental_Figure_Legends__.docx]

**Supplemental Figure legends**

Supplemental Figure S1. Canonical fully edited RPS12 ORF and 5’ UTR “Form B” sequence. The 5’ UTR “Form B” predicted initially by the Koslowsky lab was found at a higher frequency in all samples than other predicted or identified 5’ UTR forms in the literature (1,2). Annotated fully edited (edited), pre-edited sequence with each canonical editing site (ESs) numbered from 3’ to 5’. T-stripped (T-str) positions numbered from 5’ to 3’. Start and stop codons (boxes) are indicated. Vertical lines delineate the sequence examined by RNA-seq and correspond to the 3’ ends of the PCR primers.

Supplemental Figure S2. Analyses of editing proteins in mitochondrial extracts and IPs, and upon KH2F1-RNAi and KREH2-RNAi. (A-B) Representative western blots of enriched mitochondrial extract (extract) and IP samples upon KH2F1-RNAi (panel A) or KREH2-RNAi (panel B) at the indicated days of tetracycline (Tet) induction. Proteins examined: KREH2, KH2F1, RESC2 (western blotting), and KREL1 (radioactive autoadenylation). Sizing is in kDa. The large KREH2 protein in the IPs showed a slight upshift in the gels for unclear reasons but could potentially be caused by remaining IgG in the samples. (C-D) Growth curves upon KH2F1-RNAi or KREH2-RNAi +/- Tet followed over nine days. Values and error bars reflect mean of n=2 +SD independent biological replicates. Samples at day 0 were used to compare mtRNA vs. IPs in our RNA-seq studies.

Supplemental Figure S3. Total RNA editing in mtRNA, KH2F1-IPs, and RESC6-IPs: (A) Site-by-site, and (B) Cumulative analysis in the RPS12 ORF sequence. All annotations are as in Fig. 2. Sliding window analyses are included comparing mtRNA to RESC6-IP (top tier) or KH2F1-IP (bottom tier).

Supplemental Figure S4. Site-by-site percentage of correct (A-B) and incorrect editing reads (C-D) in RPS12 from mtRNA, KREH2-IPs, and RESC6-IPs. The positions inside boxes in A and C are magnified in panels B and D, respectively. Log2 scales were used (100% is marked in panel A). Values and error bars reflect mean of n=2 +SD independent biological replicates.

Supplemental Figure S5. RNA editing accuracy in mtRNA, KH2F1-IPs, and RESC6-IPs: (A) Site-by-site, and (B) Cumulative Inc/Cor analyses in the RPS12 ORF sequence. All annotations are described in Fig. 3, including sliding-window statistics comparing mtRNA to RESC6-IP (top tier) or KH2F1-IP (bottom tier). Values and error bars reflect mean of n=2 +SD independent biological replicates.

Supplemental Figure S6. Site-by-site percentage of correct (A-B) and incorrect (C-D) editing reads in RPS12 from RESC6-IPs upon KH2F1-RNAi. Positions inside boxes in A and C are expanded in B and D, respectively. All annotations are as in Supplemental Fig. S4.

Supplemental Figure S7. Editing analyses at select ESs in RESC6-IPs of KH2F1-RNAi extracts. Percentage of editing reads: (A) Correct (upper panel) and incorrect (lower panel) at positions T-str 47-49 (left), T-str 79-82 (middle), and T-str 87-89 (right). (B) Normalized frequency of each T-number (i.e., T=0, T=1, T=2, etc.) at T-str 48, T-str 80, and T-str 88 (the -Tet control = 1). T-numbers representing correct (fully-edited; red box) or pre-edited sequence (dotted box) are indicated. The following values were calculated under the histograms for the -Tet control sample: percentage of each read with the indicated T-number (all reads = 100%) and percentage of each incorrect read type (all incorrect reads = 100%). Only T-numbers 0-4 are scored. A low number of editing events with T-number >4 are not included in panel B. Values, and error bars reflect mean +SD of n=2 independent biological replicates.

Supplemental Figure S8. Canonical fully edited A6 3’ fragment. The 3’ UTR sequence was found at a higher frequency in all samples than other identified or predicted 3’ UTR forms in the literature (2,3). Annotated fully edited (edited), pre-edited sequence with each canonical editing site (ESs) numbered from 3’ to 5’. T-stripped (T-str) positions numbered from 5’ to 3’. The stop codon (box) is indicated. Vertical lines delineate the sequence examined by RNA-seq and correspond to the 3’ ends of the PCR primers.

Supplemental Figure S9. Total RNA editing in mtRNA upon KH2F1-RNAi: (A) Site-by-site, and (B) Cumulative analysis in the RPS12 ORF sequence. All annotations are as in Figs. 2 and 4. Sliding window analyses are included comparing -Tet to +Tet day 4 (top tier) or +Tet day 3 (bottom tier).

Supplemental Figure S10. Total RNA editing in mtRNA upon KREH2-RNAi: (A) Site-by-site, and (B) Cumulative analysis in the RPS12 ORF sequence. All annotations are as in Figs. 2 and 4. Sliding window analyses are included comparing -Tet to +Tet day 4 (top tier) or +Tet day 3 (bottom tier).

Supplemental Figure S11. RNA editing accuracy in mtRNA upon RNAi: (A) Site-by-site, and (B-C) Cumulative Inc/Cor analyses in the RPS12 ORF sequence. KH2F1-RNAi in panels A-B and KREH2-RNAi in panel C. All annotations are as in Fig. 3. Sliding window analyses are included comparing -Tet to +Tet day 4 (top tier) or +Tet day 3 (bottom tier).

Supplemental Figure S12. RNA editing accuracy in an A6 3’ sequence in mtRNA upon KH2F1-RNAi: (A) Site-by-site, and (B) Cumulative analysis in A6 mRNA in positions T-str (59-115). All annotations are as in Fig. 8A-B. Sliding window analyses are included comparing -Tet to +Tet day 4 (top tier) or +Tet day 3 (bottom tier).

References:

1. Kirby, L.E. and Koslowsky, D.J. (2017) Mitochondrial dual-coding genes in Trypanosoma brucei. *PLoS Negl Trop Dis*, **11**, e0005989.

2. Cooper, S., Wadsworth, E.S., Ochsenreiter, T., Ivens, A., Savill, N.J. and Schnaufer, A. (2019) Assembly and annotation of the mitochondrial minicircle genome of a differentiation-competent strain of Trypanosoma brucei. *Nucleic Acids Res* **47**, 11304-11325.

3. Koslowsky, D.J., Sun, Y., Hindenach, J., Theisen, T. and Lucas, J. (2013) The insect-phase gRNA transcriptome in Trypanosoma brucei. *Nucleic Acids Res* **42**, 1873-86
