# Supplementary material
Source: HighWire-hosted journal article supplement (doi:10.1101/rna.076513.120)
Supplement: Supplemental_Table_S1-S5_Legends_.docx [file Supplemental_Table_S1-S5_Legends_.docx]

**SUPPLEMENTAL TABLE LEGENDS**

Supplemental Table S1. Illumina RPS12 and A6 libraries used in each figure and Person’s correlations for all replicates. KREH2 (H2), KH2F1 (F1), RESC6.

Supplemental Table S2. Number of reads for each T number (T=0 to T=16). Black and red boxes indicate reads with pre-edited and fully-edited sequences, respectively. High-frequency events in two replicates of RPS12 (e.g., J07 & J16; RESC6-IPs) and A6 (e.g., J79 & J88; RESC6-IPs) are color-coded (≥5% to ≥30%). Gene-specific forward and reverse primers in the PCR amplification are in a gray box.

Supplemental Table S3. Percentage of correct (Cor), incorrect (Inc) reads, and Inc/Cor values in RPS12 and A6 libraries. Replicates (n=2) were organized for each type of analysis (mtRNA vs IPs; RNAi effects in RESC6-IPs; RNAi effects in mtRNA). Samples for mtRNA, KREH2-IPs, and RESC6-IPs are from an KH2F1-RNAi analysis at day 0. Samples for mtRNA, KH2F1-IPs, and RESC6-IPs are from a KREH2-RNAi analysis at day 0. The total number of reads in each sample is indicated.

Supplemental Table S4. Inc/Cor fold change values in the RPS12 ORF sequence, and examined 3’ sequence of A6 in RESC6-IPs. Two replicates of RPS12 and A6 in RESC6-IPs were examined (J07/J16, and J79/J88, respectively). Mean values are reported (n=2 +SD). The range of Inc/Cor mean values is color-coded and tallied. In RPS12, the three highest Inc/Cor fold-change values in the ORF are boxed (gray). IPS frequency values from the Read lab (1) are color-coded (high-to-low frequency). In A6, Inc/Cor fold-change values > 25 are boxed (gray).

Supplemental Table S5. KH2F1-RNAi and KREH2-RNAi effects. (A) Cor and Inc values at positions T-str 136, 142, 146. The most common (T=2) and second-most common (T=1) incorrectly edited sequences at T-str 142. RNAi effects on the T=2 and T=1 non-canonical events at position T-str 142. Mean values (n=2 +SD) are reported. (B) Inc/Cor fold change values in the 3’ end of RPS12 ORF from RESC6-IPs. Calculation of fold change of Inc/Cor for positions T-str 135-151 covered by gRNA-1 and gRNA-2. Inc/Cor and fold change values are color-coded as in Supplemental Table S5.

**REFERENCES**

1. Simpson, R.M., Bruno, A.E., Bard, J.E., Buck, M.J. and Read, L.K. (2016) High-throughput sequencing of partially edited trypanosome mRNAs reveals barriers to editing progression and evidence for alternative editing. *RNA*, **22**, 677-695.
