# Supplementary material
Source: HighWire-hosted journal article supplement (doi:10.1101/rna.076513.120)
Supplement: Supplemental_Table_S1.xlsx [file Supplemental_Table_S1.xlsx]

## Sheet: RPS12 Libraries each figure
Supplemental Table S1. RPS12 Illumina libraries used in each figure.
Library	Sample		Reads				MAIN FIGURES	R1 Libraries	R2 Libraries
J01	F1 RNAi 0Day input	KH2F1-RNAi cell line	37560	F1=	KH2F1		Fig 1	J07	Not Used
J02	F1 RNAi 3Day input		26547	H2=	KREH2		Fig 2	J01, J04, J07	J10,13,16
J03	F1 RNAi 4Day input		32473	input=	mito extract		Fig 3	J01, J04, J07	J10,13,16
J04	F1 RNAi 0Day H2 IP		24023				Fig 4 A	J07, J08, J09	J16, J17, J18
J07	F1 RNAi 0Day RESC6 IP		28777				Fig 4 B	J25, J26, J27	J34, J35, J36
J08	F1 RNAi 3Day RESC6 IP		21292				Fig 5 A,B	J07, J08, J09	J16, J17, J18
J09	F1 RNAi 4Day RESC6 IP		50858				Fig 5 C	J25, J26, J27	J34, J35, J36
J10	F1 RNAi 0Day Input Bio Rep		44940				Fig 6 C left	J07, J08, J09	J16, J17, J18
J11	F1 RNAi 3Day Input Bio Rep		45718				Fig 6 C right	J25, J26, J27	J34, J35, J36
J12	F1 RNAi 4Day Input Bio Rep		51301				Fig 6 D	J25, J26, J27	J34, J35, J36
J13	F1 RNAi 0Day H2 IP Bio Rep		32064
J16	F1 RNAi 0Day RESC6 IP Bio Rep		24612
J17	F1 RNAi 3Day RESC6 IP Bio Rep		47424
J18	F1 RNAi 4Day RESC6 IP Bio Rep		42623
J19	H2 RNAi 0Day input	KREH2-RNAi cell line	44178
J20	H2 RNAi 3Day input		28782				SUPPLEMENT	R1 Libraries	R2 Libraries
J21	H2 RNAi 4Day input		48729				Fig S3	J19, J22, J25	J28, J31, J34
J22	H2 RNAi 0Day F1 IP		44644				Fig S4	J01, J04, J07	J10,13,16
J25	H2 RNAi 0Day RESC6 IP		40477				Fig S5	J19, J22, J25	J28, J31, J34
J26	H2 RNAi 3Day RESC6 IP		28778				Fig S6	J07, J08, J09	J16, J17, J18
J27	H2 RNAi 4Day RESC6 IP		24045				Fig S7	J07, J08, J09	J16, J17, J18
J28	H2 RNAi 0Day input Bio Rep		32620				Fig S8 A,C,D	J01, J04, J07	J10,13,16
J29	H2 RNAi 0Day input Bio Rep		33043				Fig S8 B,E,F	J07, J08, J09	J16, J17, J18
J30	H2 RNAi 0Day input Bio Rep		44318				Fig S10	J01, J02, J03	J10, J11, J12
J31	H2 RNAi 0Day F1 IP Bio Rep		38504				Fig S11	J19, J20, J21	J28, J29, J30
J34	H2 RNAi 0Day RESC6 IP Bio Rep		38909				Fig S12 A,B	J01, J02, J03	J10, J11, J12
J35	H2 RNAi 3Day RESC6 IP Bio Rep		38006				Fig S12 C	J19, J20, J21	J28, J29, J30
J36	H2 RNAi 4Day RESC6 IP Bio Rep		45606

## Sheet: A6 Libraries each figure
Supplemental Table S1. A6 Illumina libraries used in each figure.
Library	Sample		Reads				MAIN FIGURES	R1 Libraries	R2 Libraries
X01	F1 RNAi 0Day input	KH2F1-RNAi cell line	91183	F1=	KH2F1		Fig 7	J79, J80, J81	J88, J89, J90
J74	F1 RNAi 3Day input		25837	H2=	KREH2		Fig 8	J79, J80, J81	J88, J89, J90
J75	F1 RNAi 4Day input		28241	input=	mito extract
J76	F1 RNAi 0Day H2 IP		38273
J79	F1 RNAi 0Day RESC6 IP		17367
J80	F1 RNAi 3Day RESC6 IP		18653
J81	F1 RNAi 4Day RESC6 IP		21139
X02	F1 RNAi 0Day Input Bio Rep		96251
J83	F1 RNAi 3Day Input Bio Rep		20556
J84	F1 RNAi 4Day Input Bio Rep		36403
J85	F1 RNAi 0Day H2 IP Bio Rep		25948				SUPPLEMENT	R1 Libraries	R2 Libraries
J88	F1 RNAi 0Day RESC6 IP Bio Rep		28314				Fig S13	X01, J74, J75	X02, J83, J84
J89	F1 RNAi 3Day RESC6 IP Bio Rep		20940
J90	F1 RNAi 4Day RESC6 IP Bio Rep		20738

## Sheet: RPS12 Pearson’s correlations
RPS12 TOTAL EDITS_scatter plots
mtRNA, KREH2-IP, RESC6-IP replicates
																										F1=	KH2F1
																										H2=	KREH2
mtRNA, KH2F1-IP, RESC6-IP replicates
KH2F1-RNAi (RESC6-IP) replicates
KREH2-RNAi (RESC6-IP) replicates
KH2F1-RNAi (mtRNA) replicates
KREH2-RNAi (mtRNA) replicates

## Sheet: A6 Pearson’s correlations
A6 TOTAL EDITS_scatter plots
mtRNA, KREH2-IP, RESC6-IP replicates
																									F1=	KH2F1
																									H2=	KREH2
KH2F1-RNAi (RESC6-IP) replicates
KH2F1-RNAi (mtRNA) replicates
