# Supplementary material
Source: HighWire-hosted journal article supplement (doi:10.1101/rna.076513.120)
Supplement: Supplemental_Table_S2.xlsx [file Supplemental_Table_S2.xlsx]

## Sheet: RPS12_F1-RNAi Ext vs IPs R1
Supplementatry Table S2. Talies of T# values in all libraries.												F1=	KH2F1
Notes: See the suplementary table legend for additional details.												H2=	KREH2
RPS12_KH2F1-RNAi_mtRNA vs IPs_R1
						JO1 - F1 RNAi 0Day Input																	J04 - F1 RNAi 0Day H2 IP																	J07 - F1 RNAi 0Day RESC6 IP
			no of Ts present before that position			# reads with indicated # Ts present before that position																	# reads with indicated # Ts present before that position																	# reads with indicated # Ts present before that position
	sequence	T-stripped	pre-edited	edited	editing events; del = -; ins = +	0	1	2	3	4	5	6	7	8	9	10	11	12	13	14	15	16	0	1	2	3	4	5	6	7	8	9	10	11	12	13	14	15	16	0	1	2	3	4	5	6	7	8	9
	C	1
5' end	A	2
	A	3
	A	4
	C	5
	A	6
	C	7
	G	8
	A	9
	A	10
	A	11																																								0.05
	C	12																																								0.1
	A	13																																								0.2
	A	14																																								0.3
	A	15
	C	16	0	0	0	33945	0	0	0	0	0	0	0	0	0	0	0	0	0	0	0	0	21632	0	0	0	0	0	0	0	0	0	0	0	0	0	0	0	0	26135	0	0	0	0	0	0	0	0	0
	A	17	1	1	0	95	33848	2	0	0	0	0	0	0	0	0	0	0	0	0	0	0	97	21533	2	0	0	0	0	0	0	0	0	0	0	0	0	0	0	167	25968	0	0	0	0	0	0	0	0
	A	18	0	0	0	33927	11	2	5	0	0	0	0	0	0	0	0	0	0	0	0	0	21623	7	2	0	0	0	0	0	0	0	0	0	0	0	0	0	0	26108	16	6	5	0	0	0	0	0	0
	A	19	0	0	0	33901	21	23	0	0	0	0	0	0	0	0	0	0	0	0	0	0	21596	18	14	3	0	0	1	0	0	0	0	0	0	0	0	0	0	26059	31	43	2	0	0	0	0	0	0
	G	20	0	0	0	33896	23	22	0	3	1	0	0	0	0	0	0	0	0	0	0	0	21576	25	27	1	1	0	2	0	0	0	0	0	0	0	0	0	0	26019	59	52	4	1	0	0	0	0	0
	A	21	1	1	0	1787	32069	79	6	1	0	1	0	0	2	0	0	0	0	0	0	0	1903	19640	65	17	4	0	0	0	0	3	0	0	0	0	0	0	0	5367	20555	178	19	8	2	2	0	0	2
	A	22	0	0	0	32212	527	1175	24	2	4	1	0	0	0	0	0	0	0	0	0	0	19853	515	1233	18	4	7	2	0	0	0	0	0	0	0	0	0	0	21330	1375	3359	56	4	5	6	0	0	0
ES76i	A	23	0	1	1	32783	936	168	50	6	0	2	0	0	0	0	0	0	0	0	0	0	20482	930	160	43	12	3	0	2	0	0	0	0	0	0	0	0	0	22889	2675	436	120	12	0	2	1	0	0
	A	24	0	0	0	33204	503	35	144	17	3	24	3	12	0	0	0	0	0	0	0	0	20812	557	54	156	12	3	14	1	23	0	0	0	0	0	0	0	0	23930	1602	111	385	26	11	34	5	31	0
	A	25	0	0	0	32238	424	63	104	958	144	6	3	2	3	0	0	0	0	0	0	0	19806	467	57	97	1044	137	17	1	2	4	0	0	0	0	0	0	0	21364	1255	134	237	2681	432	22	0	0	9
ES75i	G	26	0	4	4	31431	173	1089	58	785	392	16	1	0	0	0	0	0	0	0	0	0	19071	134	1176	81	719	435	11	2	1	2	0	0	0	0	0	0	0	19171	286	3126	189	2120	1203	29	11	0	0
ES74i	G	27	0	8	8	31275	113	46	44	7	1005	58	59	1192	33	6	18	59	25	4	1	0	18904	105	48	48	14	1060	40	55	1190	41	10	17	66	28	6	0	0	18723	172	114	94	37	2884	121	188	3437	77
	C	28	0	0	0	33767	116	41	10	10	0	0	0	0	1	0	0	0	0	0	0	0	21458	119	28	16	7	2	1	1	0	0	0	0	0	0	0	0	0	25850	191	61	15	11	3	4	0	0	0
	G	29	0	0	0	33911	24	5	4	1	0	0	0	0	0	0	0	0	0	0	0	0	21593	22	12	5	0	0	0	0	0	0	0	0	0	0	0	0	0	26065	32	27	9	1	0	1	0	0	0
ES73i	A	30	0	1	1	31266	2556	40	48	21	6	8	0	0	0	0	0	0	0	0	0	0	18936	2584	36	44	19	2	11	0	0	0	0	0	0	0	0	0	0	18782	7164	71	70	26	9	13	0	0	0
ES72i	G	31	0	1	1	31219	2582	65	36	11	7	1	1	0	0	5	15	3	0	0	0	0	18873	2619	56	49	17	4	1	0	0	0	2	10	1	0	0	0	0	18748	7181	96	62	20	5	1	1	0	1
ES71i	G	32	0	1	1	31271	2521	87	37	18	6	4	1	0	0	0	0	0	0	0	0	0	18911	2564	70	53	19	7	7	1	0	0	0	0	0	0	0	0	0	18876	7052	83	66	32	11	15	0	0	0
	A	33	0	0	0	33603	189	85	44	3	7	13	0	1	0	0	0	0	0	0	0	0	21327	145	75	56	8	7	9	0	3	2	0	0	0	0	0	0	0	25574	344	93	94	9	4	16	0	1	0
ES70d	G	34	6	5	-1	61	174	217	88	80	2465	30829	31	0	0	0	0	0	0	0	0	0	61	158	184	63	61	2467	18610	26	2	0	0	0	0	0	0	0	0	80	269	354	122	104	6755	18427	23	1	0
ES69i	A	35	0	1	1	31092	2758	37	20	12	13	9	0	4	0	0	0	0	0	0	0	0	18821	2721	30	14	17	2	19	1	7	0	0	0	0	0	0	0	0	18660	7342	33	41	12	19	23	2	3	0
ES68i	G	36	0	1	1	31084	2733	45	51	20	5	6	0	0	0	0	1	0	0	0	0	0	18838	2702	29	31	20	9	3	0	0	0	0	0	0	0	0	0	0	18679	7312	61	48	20	7	5	2	0	0
ES67d	G	37	1	0	-1	2772	30967	58	114	8	8	15	2	0	1	0	0	0	0	0	0	0	2724	18769	42	72	3	3	18	0	0	0	1	0	0	0	0	0	0	7341	18605	31	126	4	5	19	0	0	0
ES66i	G	38	0	2	2	31059	53	2723	27	7	0	8	10	57	0	0	0	1	0	0	0	0	18824	51	2687	14	7	4	5	7	32	0	0	0	1	0	0	0	0	18699	65	7286	15	10	2	7	6	45	0
ES65i	G	39	0	2	2	30945	202	2718	39	15	24	2	0	0	0	0	0	0	0	0	0	0	18763	148	2668	33	6	12	2	0	0	0	0	0	0	0	0	0	0	18609	174	7253	57	4	38	0	0	0	0
ES64i	A	40	0	3	3	30998	119	126	2655	10	5	32	0	0	0	0	0	0	0	0	0	0	18784	92	92	2619	5	2	35	3	0	0	0	0	0	0	0	0	0	18647	133	109	7180	7	2	54	3	0	0
	C	41	0	0	0	33523	202	186	27	4	3	0	0	0	0	0	0	0	0	0	0	0	21408	135	62	22	3	1	0	0	1	0	0	0	0	0	0	0	0	25892	162	54	24	3	0	0	0	0	0
ES63d	G	42	1	0	-1	3730	30186	18	11	0	0	0	0	0	0	0	0	0	0	0	0	0	3118	18500	9	4	0	1	0	0	0	0	0	0	0	0	0	0	0	7695	18422	11	6	0	0	1	0	0	0
ES62i	G	43	0	4	4	30698	271	135	194	2622	21	0	4	0	0	0	0	0	0	0	0	0	18707	126	67	90	2615	25	0	2	0	0	0	0	0	0	0	0	0	18616	115	107	115	7162	18	0	2	0	0
ES61i	A	44	0	4	4	30649	236	186	264	2600	7	2	0	1	0	0	0	0	0	0	0	0	18705	111	99	118	2595	1	3	0	0	0	0	0	0	0	0	0	0	18639	111	119	131	7131	3	1	0	0	0
ES60i	G	45	0	3	3	30030	156	130	3419	194	15	1	0	0	0	0	0	0	0	0	0	0	18455	65	53	2966	84	8	1	0	0	0	0	0	0	0	0	0	0	18357	74	67	7481	127	27	2	0	0	0
ES59i	A	46	0	4	4	29926	17	113	1098	2784	5	1	0	0	1	0	0	0	0	0	0	0	18423	15	36	491	2663	3	1	0	0	0	0	0	0	0	0	0	0	18348	15	30	521	7217	2	2	0	0	0
ES58i	G	47	0	1	1	29887	2850	28	31	1146	0	3	0	0	0	0	0	0	0	0	0	0	18415	2667	13	28	506	0	3	0	0	0	0	0	0	0	0	0	0	18319	7232	24	32	525	0	3	0	0	0
ES57i	A	48	0	2	2	29869	211	2859	29	974	3	0	0	0	0	0	0	0	0	0	0	0	18404	104	2677	10	436	1	0	0	0	0	0	0	0	0	0	0	0	18330	120	7239	8	436	1	0	0	0	1
ES56i	A	49	0	2	2	29823	42	4047	23	8	1	0	0	1	0	0	0	0	0	0	0	0	18372	30	3208	16	6	0	0	0	0	0	0	0	0	0	0	0	0	18305	33	7777	12	6	0	1	1	0	0
ES55i	A	50	0	1	1	29832	3854	248	2	8	0	0	1	0	0	0	0	0	0	0	0	0	18382	3136	110	3	1	0	0	0	0	0	0	0	0	0	0	0	0	18317	7702	111	2	3	0	0	0	0	0
ES54i	G	51	0	1	1	29839	3910	127	17	52	0	0	0	0	0	0	0	0	0	0	0	0	18387	3101	106	6	31	0	0	0	1	0	0	0	0	0	0	0	0	18371	7526	225	3	9	0	0	0	0	1
	A	52	0	0	0	33590	39	222	16	2	69	6	0	1	0	0	0	0	0	0	0	0	21447	19	122	4	2	37	1	0	0	0	0	0	0	0	0	0	0	25930	59	122	3	3	18	0	0	0	0
	G	53	0	0	0	33798	43	96	5	1	1	1	0	0	0	0	0	0	0	0	0	0	21563	20	49	0	0	0	0	0	0	0	0	0	0	0	0	0	0	26090	18	25	2	0	0	0	0	0	0
ES53i	C	54	0	1	1	31444	2491	6	3	1	0	0	0	0	0	0	0	0	0	0	0	0	19368	2256	2	4	2	0	0	0	0	0	0	0	0	0	0	0	0	20095	6032	5	0	2	1	0	0	0	0
	C	55	0	0	0	33919	15	11	0	0	0	0	0	0	0	0	0	0	0	0	0	0	21614	12	5	1	0	0	0	0	0	0	0	0	0	0	0	0	0	26129	5	1	0	0	0	0	0	0	0
	G	56	0	0	0	32564	1372	7	1	1	0	0	0	0	0	0	0	0	0	0	0	0	20789	840	3	0	0	0	0	0	0	0	0	0	0	0	0	0	0	24588	1547	0	0	0	0	0	0	0	0
ES52d	C	57	2	0	-2	4414	184	29345	1	0	0	1	0	0	0	0	0	0	0	0	0	0	3370	108	18151	2	1	0	0	0	0	0	0	0	0	0	0	0	0	7914	63	18153	5	0	0	0	0	0	0
	G	58	0	0	0	33914	30	1	0	0	0	0	0	0	0	0	0	0	0	0	0	0	21609	23	0	0	0	0	0	0	0	0	0	0	0	0	0	0	0	26119	16	0	0	0	0	0	0	0	0
	A	59	0	0	0	33742	111	34	39	1	10	6	1	1	0	0	0	0	0	0	0	0	21518	66	24	18	1	5	0	0	0	0	0	0	0	0	0	0	0	26048	40	16	20	4	1	2	3	1	0
ES51i	G	60	0	2	2	29473	397	4020	48	1	0	4	2	0	0	0	0	0	0	0	0	0	18240	198	3158	34	1	0	1	0	0	0	0	0	0	0	0	0	0	18222	260	7616	36	1	0	0	0	0	0
	C	61	0	0	0	33751	153	25	14	1	1	0	0	0	0	0	0	0	0	0	0	0	21539	85	3	5	0	0	0	0	0	0	0	0	0	0	0	0	0	26059	56	8	11	1	0	0	0	0	0
	C	62	0	0	0	33934	9	2	0	0	0	0	0	0	0	0	0	0	0	0	0	0	21628	2	1	0	1	0	0	0	0	0	0	0	0	0	0	0	0	26133	1	1	0	0	0	0	0	0	0
	C	63	0	0	0	33834	108	2	0	0	0	0	1	0	0	0	0	0	0	0	0	0	21556	74	1	1	0	0	0	0	0	0	0	0	0	0	0	0	0	26080	53	2	0	0	0	0	0	0	0
	A	64	0	0	0	33748	183	6	8	0	0	0	0	0	0	0	0	0	0	0	0	0	21504	122	5	1	0	0	0	0	0	0	0	0	0	0	0	0	0	26030	101	1	3	0	0	0	0	0	0
	G	65	0	0	0	33407	148	252	124	5	6	1	0	1	0	0	0	0	1	0	0	0	21346	74	133	76	1	2	0	0	0	0	0	0	0	0	0	0	0	25927	62	92	48	1	5	0	0	0	0
ES50i	C	66	0	2	2	30366	154	3388	22	3	9	0	0	0	2	1	0	0	0	0	0	0	18928	67	2615	14	1	7	0	0	0	0	0	0	0	0	0	0	0	19678	65	6369	13	4	6	0	0	0	0
	C	67	0	0	0	32808	1114	23	0	0	0	0	0	0	0	0	0	0	0	0	0	0	20858	763	11	0	0	0	0	0	0	0	0	0	0	0	0	0	0	24643	1469	23	0	0	0	0	0	0	0
	G	68	0	0	0	32872	1010	34	29	0	0	0	0	0	0	0	0	0	0	0	0	0	20897	689	26	20	0	0	0	0	0	0	0	0	0	0	0	0	0	24662	1430	30	13	0	0	0	0	0	0
	G	69	0	0	0	31091	442	2193	83	48	85	1	2	0	0	0	0	0	0	0	0	0	20130	219	1192	36	20	30	1	4	0	0	0	0	0	0	0	0	0	25071	166	838	20	16	22	0	2	0	0
ES49i	A	70	0	1	1	28368	5138	351	51	20	11	4	2	0	0	0	0	0	0	0	0	0	17754	3661	185	16	9	1	3	3	0	0	0	0	0	0	0	0	0	17864	8078	165	14	6	3	3	2	0	0
	A	71	0	0	0	31180	329	229	216	1931	45	13	1	1	0	0	0	0	0	0	0	0	20201	124	100	102	1059	35	6	2	3	0	0	0	0	0	0	0	0	25174	103	78	57	696	22	3	0	2	0
	C	72	0	0	0	33487	417	29	7	0	5	0	0	0	0	0	0	0	0	0	0	0	21414	205	10	0	1	2	0	0	0	0	0	0	0	0	0	0	0	25859	264	10	1	0	0	0	1	0	0
	C	73	0	0	0	33778	142	20	2	0	3	0	0	0	0	0	0	0	0	0	0	0	21535	83	13	1	0	0	0	0	0	0	0	0	0	0	0	0	0	26021	105	8	1	0	0	0	0	0	0
	G	74	0	0	0	33793	53	93	4	2	0	0	0	0	0	0	0	0	0	0	0	0	21546	21	62	3	0	0	0	0	0	0	0	0	0	0	0	0	0	26016	22	92	4	1	0	0	0	0	0
	A	75	0	0	0	32957	387	183	103	34	269	11	1	0	0	0	0	0	0	0	0	0	21113	177	103	52	23	160	3	0	1	0	0	0	0	0	0	0	0	25655	147	112	47	23	149	2	0	0	0
	C	76	0	0	0	33099	451	107	255	28	2	0	3	0	0	0	0	0	0	0	0	0	21231	219	61	96	23	1	0	1	0	0	0	0	0	0	0	0	0	25777	206	42	95	13	1	0	1	0	0
	G	77	0	0	0	33806	108	14	16	0	0	0	1	0	0	0	0	0	0	0	0	0	21575	46	7	4	0	0	0	0	0	0	0	0	0	0	0	0	0	26078	50	2	5	0	0	0	0	0	0
ES48i	G	78	0	1	1	28306	4959	252	375	22	23	5	0	2	0	1	0	0	0	0	0	0	17629	3641	137	198	12	13	2	0	0	0	0	0	0	0	0	0	0	17747	8072	114	177	10	11	2	2	0	0
ES47i	A	79	0	1	1	27825	4458	856	700	24	51	11	10	1	0	2	2	4	1	0	0	0	17394	3388	496	309	15	17	5	1	0	0	0	2	5	0	0	0	0	17612	7850	331	305	7	24	1	0	0	0
ES46i	G	80	0	2	2	27431	2174	4088	153	19	19	2	43	2	13	1	0	0	0	0	0	0	17148	1189	3160	94	11	9	4	13	0	4	0	0	0	0	0	0	0	17524	885	7627	57	8	5	2	23	0	2
ES45i	A	81	0	1	1	28588	4878	263	122	40	31	11	2	10	0	0	0	0	0	0	0	0	17821	3544	151	66	16	15	5	1	13	0	0	0	0	0	0	0	0	17898	7982	159	63	16	12	5	0	0	0
ES44i	G	82	0	1	1	22714	9949	601	368	48	60	199	4	1	1	0	0	0	0	0	0	0	14676	6276	364	238	12	13	50	2	1	0	0	0	0	0	0	0	0	15655	9800	370	182	26	29	72	1	0	0
	C	83	0	0	0	32690	830	165	249	7	1	1	2	0	0	0	0	0	0	0	0	0	20957	418	90	150	13	1	2	1	0	0	0	0	0	0	0	0	0	25591	379	73	89	1	0	1	1	0	0
ES43d	C	84	2	0	-2	12490	884	20537	27	7	0	0	0	0	0	0	0	0	0	0	0	0	7826	466	13318	21	1	0	0	0	0	0	0	0	0	0	0	0	0	11139	399	14572	21	4	0	0	0	0	0
ES42d	G	85	4	0	-4	13947	635	118	132	19099	12	1	1	0	0	0	0	0	0	0	0	0	8718	264	74	71	12496	6	1	2	0	0	0	0	0	0	0	0	0	11830	279	51	65	13904	5	1	0	0	0
ES41i	A	86	0	1	1	23006	9155	1493	105	163	19	2	1	1	0	0	0	0	0	0	0	0	14674	5691	1072	67	107	12	9	0	0	0	0	0	0	0	0	0	0	15914	9256	740	92	118	10	4	1	0	0
ES40i	A	87	0	4	4	22236	1001	1491	547	8595	67	6	1	0	1	0	0	0	0	0	0	0	14280	580	945	352	5436	36	3	0	0	0	0	0	0	0	0	0	0	15540	521	684	383	8956	49	1	0	1	0
ES39i	A	88	1	3	2	2876	20917	572	9227	280	45	22	3	1	1	0	0	0	0	1	0	0	1811	13464	318	5820	189	24	5	0	1	0	0	0	0	0	0	0	0	1462	14883	331	9321	116	12	5	1	3	0
ES38i	A	89	0	1	1	19727	10391	2025	1366	193	135	23	75	8	2	0	0	0	0	0	0	0	12977	6368	1149	901	109	62	15	49	2	0	0	0	0	0	0	0	0	14382	9878	1035	613	98	83	9	36	1	0
ES37i	A	90	0	1	1	20920	9961	1540	450	332	278	110	99	248	4	1	1	1	0	0	0	0	13541	6254	1006	272	177	153	58	51	116	4	0	0	0	0	0	0	0	14945	9646	751	300	122	132	54	73	108	4
	A	91	0	0	0	28553	1298	2542	899	287	93	260	11	1	1	0	0	0	0	0	0	0	18687	736	1259	577	182	47	136	1	4	2	1	0	0	0	0	0	0	23318	728	1237	492	165	57	122	12	3	1
ES36i	G	92	0	4	4	19836	3165	827	1841	8006	153	69	7	10	8	16	5	2	0	0	0	0	12909	1684	455	1197	5224	80	56	4	6	11	6	0	0	0	0	0	0	14400	1576	408	1011	8623	59	38	5	5	6
ES35i	G	93	0	3	3	21787	2418	863	8163	529	155	16	10	1	1	1	0	1	0	0	0	0	13862	1499	574	5350	264	74	8	0	0	0	0	0	0	0	0	1	0	15362	1212	532	8740	208	68	4	4	1	2
	G	94	0	0	0	29291	3050	431	610	404	73	44	39	1	2	0	0	0	0	0	0	0	19076	1637	227	329	289	45	19	9	1	0	0	0	0	0	0	0	0	23738	1497	200	324	307	40	14	13	1	1
	A	95	0	0	0	28516	2548	1644	411	150	81	61	88	60	349	33	4	0	0	0	0	0	18491	1621	955	233	79	33	27	31	25	127	7	3	0	0	0	0	0	23405	1333	829	202	66	45	35	46	20	140
ES34i	G	96	0	1	1	21915	9306	1681	849	87	40	40	9	7	9	1	1	0	0	0	0	0	14306	5873	824	538	41	22	16	1	3	8	0	0	0	0	0	0	0	15427	9338	822	444	41	29	22	7	1	2
ES33i	G	97	0	2	2	16675	1446	11430	2853	959	172	221	175	8	3	1	2	0	0	0	0	0	11055	657	7607	1493	528	75	128	80	8	1	0	0	0	0	0	0	0	12762	677	10389	1494	509	98	142	58	5	1
	C	98	0	0	0	27053	4659	320	1797	71	20	7	17	0	1	0	0	0	0	0	0	0	17379	2907	166	1135	32	5	5	3	0	0	0	0	0	0	0	0	0	22645	2365	182	875	57	3	2	6	0	0
	G	99	0	0	0	29136	1720	55	2992	33	8	1	0	0	0	0	0	0	0	0	0	0	18248	1078	44	2240	20	1	1	0	0	0	0	0	0	0	0	0	0	23665	840	41	1565	18	3	3	0	0	0
ES32i	G	100	0	2	2	15433	6240	11111	259	497	62	26	13	266	34	2	1	1	0	0	0	0	10403	4048	6728	113	164	29	10	7	115	13	2	0	0	0	0	0	0	12050	3350	10050	160	346	31	15	12	104	14
ES31i	G	101	0	8	8	15242	5273	1958	201	516	119	216	275	9923	208	10	2	2	0	0	0	0	10273	3671	795	70	192	49	88	161	6214	113	5	1	0	0	0	0	0	11967	2789	1147	124	356	68	114	229	9175	163
ES30i	G	102	0	2	2	15684	321	16069	827	978	48	8	6	2	2	0	0	0	0	0	0	0	10487	124	10272	344	382	21	1	0	1	0	0	0	0	0	0	0	0	12154	227	12598	458	664	21	10	2	1	0
ES29i	A	103	0	4	4	19591	1513	614	592	11527	42	56	6	3	1	0	0	0	0	0	0	0	13535	550	234	301	6977	12	18	3	2	0	0	0	0	0	0	0	0	14004	1108	398	384	10175	29	29	3	0	4
ES28i	G	104	0	2	2	16434	5078	11589	711	35	29	10	44	11	1	1	1	1	0	0	0	0	10701	3604	6978	305	9	16	4	11	3	0	1	0	0	0	0	0	0	12768	2626	10378	307	19	12	1	21	3	0
	G	105	0	0	0	27535	1415	320	4526	62	63	3	21	0	0	0	0	0	0	0	0	0	17429	658	136	3326	29	46	2	6	0	0	0	0	0	0	0	0	0	22841	803	179	2228	22	57	0	4	1	0
ES27i	A	106	0	3	3	18918	729	752	12790	89	649	14	1	3	0	0	0	0	0	0	0	0	13270	368	291	7389	33	273	5	0	3	0	0	0	0	0	0	0	0	13353	538	487	11424	35	286	5	1	6	0
	G	107	0	0	0	26700	5430	1429	191	71	64	13	9	9	27	2	0	0	0	0	0	0	16806	3726	933	70	33	38	7	0	3	14	2	0	0	0	0	0	0	22422	2600	917	102	40	27	7	1	0	19
ES26i	A	108	0	2	2	17936	2085	13625	184	79	12	7	15	1	1	0	0	0	0	0	0	0	12371	1319	7815	89	28	4	3	2	1	0	0	0	0	0	0	0	0	12486	1371	12120	96	45	5	2	8	1	1
ES25i	G	109	0	1	1	12851	18729	1362	783	142	25	10	7	36	0	0	0	0	0	0	0	0	8888	11447	890	326	47	17	1	0	16	0	0	0	0	0	0	0	0	10153	14647	851	378	62	10	9	2	23	0
ES24d	C	110	3	1	-2	2954	19690	406	10829	32	24	8	1	0	0	1	0	0	0	0	0	0	1446	11901	166	8090	14	15	0	0	0	0	0	0	0	0	0	0	0	1690	15241	209	8944	26	24	0	0	1	0
	A	111	0	0	0	33601	228	79	35	0	2	0	0	0	0	0	0	0	0	0	0	0	21468	86	60	17	1	0	0	0	0	0	0	0	0	0	0	0	0	25953	108	49	24	1	0	0	0	0	0
ES23i	A	112	0	2	2	12630	2428	18470	205	120	51	26	14	1	0	0	0	0	0	0	0	0	9218	1130	11111	90	43	26	7	7	0	0	0	0	0	0	0	0	0	10035	1599	14286	112	66	20	11	4	2	0
Es22i	A	113	0	3	3	12510	1981	774	17855	613	139	40	21	2	1	0	2	5	2	0	0	0	8831	933	335	11189	264	59	16	4	0	0	1	0	0	0	0	0	0	10049	1157	456	14019	324	89	23	14	1	0
Es21i	A	114	0	2	2	10840	1402	19425	1230	270	129	370	33	225	6	0	7	8	0	0	0	0	8071	632	11915	673	77	51	130	8	65	0	1	0	7	2	0	0	0	8961	848	14921	832	133	69	196	11	142	5
ES20i	A	115	0	1	1	10439	18999	1926	1220	801	262	138	139	11	1	2	1	4	2	0	0	0	7943	11751	955	519	286	87	38	43	6	0	0	1	3	0	0	0	0	8703	14728	1241	735	448	132	64	73	7	0
	G	116	0	0	0	27305	2235	1793	687	718	426	79	281	281	39	18	24	54	4	1	0	0	18620	1170	762	323	285	190	33	96	99	13	4	15	18	3	1	0	0	22067	1434	1123	416	423	287	65	126	141	12
	A	117	0	0	0	28368	2084	671	1027	552	279	279	106	55	57	61	125	238	40	3	0	0	19306	958	274	428	197	105	107	34	22	17	14	42	108	16	4	0	0	22818	1290	407	586	321	188	130	61	30	35
ES19d	G	118	3	0	-3	20012	2882	640	9369	147	409	409	25	15	11	5	9	9	3	0	0	0	12365	1273	269	7267	67	214	156	3	3	3	1	3	8	0	0	0	0	15544	1870	427	7752	94	234	170	7	13	10
	G	119	0	0	0	27738	3194	637	1471	447	413	20	4	18	3	0	0	0	0	0	0	0	19041	1205	313	676	233	143	4	7	8	2	0	0	0	0	0	0	0	22399	1984	436	820	269	205	4	9	8	1
	G	120	0	0	0	28017	2099	1075	1909	165	626	14	33	1	4	0	2	0	0	0	0	0	19065	993	524	695	62	274	3	12	4	0	0	0	0	0	0	0	0	22496	1461	693	1065	92	296	12	14	4	2
	G	121	1	1	0	2018	26822	2107	907	451	1522	69	32	8	8	1	0	0	0	0	0	0	997	18390	1096	359	219	527	39	3	0	2	0	0	0	0	0	0	0	1470	21489	1386	543	304	881	38	16	3	3
	G	122	0	0	0	27108	4222	1364	644	144	411	29	18	3	1	1	0	0	0	0	0	0	18677	1911	600	248	55	116	12	13	0	0	0	0	0	0	0	0	0	21749	2789	818	361	124	265	17	9	1	2
ES18i	G	123	0	1	1	9607	22963	369	401	82	77	127	313	5	1	0	0	0	0	0	0	0	7688	13295	170	161	18	36	60	199	5	0	0	0	0	0	0	0	0	7952	17250	306	239	44	63	79	199	2	1
	G	124	0	0	0	27713	5168	180	137	415	59	18	245	6	4	0	0	0	0	0	0	0	18714	2360	84	83	259	21	9	99	2	1	0	0	0	0	0	0	0	21943	3478	131	95	331	24	13	116	3	1
ES17i	G	125	0	4	4	10395	430	4471	422	17789	207	221	6	3	0	0	0	1	0	0	0	0	7429	187	2373	235	11189	108	104	2	3	0	0	2	0	0	0	0	0	8136	377	3004	267	14107	106	135	0	3	0
ES16i	G	126	0	2	2	7977	730	25189	37	5	0	1	6	0	0	0	0	0	0	0	0	0	6693	469	14443	21	1	1	2	2	0	0	0	0	0	0	0	0	0	6613	662	18812	33	3	7	1	3	0	1
	A	127	0	0	0	26350	2241	3231	1853	5	254	6	3	0	0	0	0	2	0	0	0	0	18220	1406	1150	743	6	99	5	2	0	0	0	1	0	0	0	0	0	21141	1789	2008	1065	13	110	5	3	0	1
ES15i	A	128	0	3	3	7488	4154	156	22077	14	22	33	1	0	0	0	0	0	0	0	0	0	6396	2167	77	12970	7	10	5	0	0	0	0	0	0	0	0	0	0	6210	2879	139	16878	7	12	9	1	0	0
	C	129	0	0	0	31654	1904	177	195	13	1	0	0	0	0	1	0	0	0	0	0	0	19995	1368	125	135	8	1	0	0	0	0	0	0	0	0	0	0	0	24377	1474	143	127	12	0	1	0	0	0
	C	130	0	0	0	33076	649	124	1	95	0	0	0	0	0	0	0	0	0	0	0	0	21257	279	50	5	41	0	0	0	0	0	0	0	0	0	0	0	0	25640	329	118	6	41	1	0	0	0	0
	C	131	0	0	0	33663	153	119	9	1	0	0	0	0	0	0	0	0	0	0	0	0	21498	76	52	3	3	0	0	0	0	0	0	0	0	0	0	0	0	25892	132	108	2	1	0	0	0	0	0
ES14d	G	132	3	0	-3	24944	2548	142	6293	6	5	1	2	2	1	0	0	1	0	0	0	0	15553	1655	80	4336	3	5	0	0	0	0	0	0	0	0	0	0	0	19648	1576	110	4778	10	5	3	1	3	0
ES13d	G	133	4	0	-4	23074	1040	1472	425	7914	17	1	0	0	2	0	0	0	0	0	0	0	14902	776	791	286	4870	5	0	0	2	0	0	0	0	0	0	0	0	18245	821	1159	296	5602	6	2	1	3	0
ES12i	G	134	0	1	1	8516	18234	243	6937	8	7	0	0	0	0	0	0	0	0	0	0	0	6300	12025	95	3206	3	2	0	0	0	0	0	1	0	0	0	0	0	6782	14728	198	4417	5	4	0	1	0	0
ES11d	A	135	2	1	-1	527	22922	2966	172	7332	7	14	3	2	0	0	0	0	0	0	0	0	418	14773	2930	148	3349	2	9	3	0	0	0	0	0	0	0	0	0	542	18129	2575	140	4725	8	15	1	0	0
	A	136	0	0	0	21158	12646	49	54	5	7	6	0	0	3	17	0	0	0	0	0	0	14988	6556	29	33	2	6	6	0	0	1	10	1	0	0	0	0	0	17351	8644	33	73	4	1	4	1	1	2
	A	137	0	0	0	26130	293	7491	23	3	1	1	3	0	0	0	0	0	0	0	0	0	17985	157	3470	16	1	0	2	1	0	0	0	0	0	0	0	0	0	20973	288	4824	37	7	2	2	2	0	0
	G	138	0	0	0	26209	175	7512	6	37	6	0	0	0	0	0	0	0	0	0	0	0	18007	108	3490	5	20	0	1	0	1	0	0	0	0	0	0	0	0	21054	145	4878	9	45	3	1	0	0	0
ES10i	A	139	0	1	1	8092	25782	39	22	5	0	1	4	0	0	0	0	0	0	0	0	0	6113	15494	15	6	3	0	0	1	0	0	0	0	0	0	0	0	0	6309	19766	41	12	5	2	0	0	0	0
ES9i	A	140	0	2	2	2840	5576	25502	12	4	5	0	0	1	2	1	1	1	0	0	0	0	2960	3390	15269	11	1	1	0	0	0	0	0	0	0	0	0	0	0	2266	4314	19529	18	4	2	0	0	0	0
ES8i	A	141	0	1	1	9865	17976	5131	864	107	1	1	0	0	0	0	0	0	0	0	0	0	5652	11781	3164	952	82	1	0	0	0	0	0	0	0	0	0	0	0	7147	14615	3798	483	89	2	1	0	0	0
	C	142	0	0	0	20411	706	12768	16	38	3	3	0	0	0	0	0	0	0	0	0	0	14238	460	6894	16	23	0	1	0	0	0	0	0	0	0	0	0	0	16525	717	8841	16	32	1	3	0	0	0
	A	143	0	0	0	33917	18	9	1	0	0	0	0	0	0	0	0	0	0	0	0	0	21614	11	5	2	0	0	0	0	0	0	0	0	0	0	0	0	0	26102	26	7	0	0	0	0	0	0	0
ES7d	C	144	1	0	-1	32439	1476	22	0	8	0	0	0	0	0	0	0	0	0	0	0	0	20173	1444	6	2	7	0	0	0	0	0	0	0	0	0	0	0	0	24817	1287	21	3	5	2	0	0	0	0
	G	145	0	0	0	33856	76	13	0	0	0	0	0	0	0	0	0	0	0	0	0	0	21576	44	12	0	0	0	0	0	0	0	0	0	0	0	0	0	0	26062	69	3	0	1	0	0	0	0	0
ES6d	A	146	3	1	-2	7523	23808	1518	1055	39	0	2	0	0	0	0	0	0	0	0	0	0	3461	15515	1433	1173	49	1	0	0	0	0	0	0	0	0	0	0	0	4960	19087	1187	872	27	0	2	0	0	0
ES5i	G	147	0	2	2	2302	78	31559	1	0	1	0	0	4	0	0	0	0	0	0	0	0	2458	59	19112	1	0	1	0	0	1	0	0	0	0	0	0	0	0	1809	104	24218	2	0	0	0	0	2	0
ES4i	A	148	0	1	1	2227	31708	10	0	0	0	0	0	0	0	0	0	0	0	0	0	0	2393	19222	15	0	2	0	0	0	0	0	0	0	0	0	0	0	0	1722	24396	11	3	3	0	0	0	0	0
	A	149	0	0	0	33929	8	8	0	0	0	0	0	0	0	0	0	0	0	0	0	0	21611	8	13	0	0	0	0	0	0	0	0	0	0	0	0	0	0	26117	7	6	2	0	1	1	1	0	0
	G	150	0	0	0	33931	1	10	1	2	0	0	0	0	0	0	0	0	0	0	0	0	21623	5	0	2	2	0	0	0	0	0	0	0	0	0	0	0	0	26118	7	5	2	1	2	0	0	0	0
ES3i	A	151	0	2	2	696	8	33241	0	0	0	0	0	0	0	0	0	0	0	0	0	0	880	9	20742	1	0	0	0	0	0	0	0	0	0	0	0	0	0	579	22	25532	2	0	0	0	0	0	0
	G	152	0	0	0
	A	153	0	0	0
ES2d	A	154	4	3	-1
	G	155	0	0	0
	A	156	0	0	0
ES1i	A	157	0	1	1
	A	158	1	1	0
	A	159	0	0	0
	G	160	0	0	0
	A	161	0	0	0
	A	162	1	1	0
3' end	G	163	1	1	0
Total
[truncated: 7 more columns]

## Sheet: RPS12_F1-RNAi Ext vs IPs R2
RPS12_KH2F1-RNAi_mtRNA vs IPs_R2
						J10 - F1 RNAi 0Day Input - Bio Rep																	J13 - F1 RNAi 0Day H2 IP - Bio Rep																	J16 - F1 RNAi 0Day RESC6 IP - Bio Rep
			no of Ts present before that position			# reads with indicated # Ts present before that position																	# reads with indicated # Ts present before that position																	# reads with indicated # Ts present before that position
	sequence	T-stripped	pre-edited	edited	editing events; del = -; ins = +	0	1	2	3	4	5	6	7	8	9	10	11	12	13	14	15	16	0	1	2	3	4	5	6	7	8	9	10	11	12	13	14	15	16	0	1	2	3	4	5	6	7	8	9
	C	1
5' end	A	2
	A	3
	A	4
	C	5
	A	6
	C	7
	G	8
	A	9
	A	10
	A	11																																								0.05
	C	12																																								0.1
	A	13																																								0.2
	A	14																																								0.3
	A	15
	C	16	0	0	0	40794	0	0	0	0	0	0	0	0	0	0	0	0	0	0	0	0	29128	0	0	0	0	0	0	0	0	0	0	0	0	0	0	0	0	22426	0	0	0	0	0	0	0	0	0
	A	17	1	1	0	101	40691	0	0	0	2	0	0	0	0	0	0	0	0	0	0	0	139	28987	1	0	1	0	0	0	0	0	0	0	0	0	0	0	0	112	22314	0	0	0	0	0	0	0	0
	A	18	0	0	0	40778	3	8	4	1	0	0	0	0	0	0	0	0	0	0	0	0	29109	10	3	6	0	0	0	0	0	0	0	0	0	0	0	0	0	22412	7	5	2	0	0	0	0	0	0
	A	19	0	0	0	40751	22	18	2	0	1	0	0	0	0	0	0	0	0	0	0	0	29082	21	22	3	0	0	0	0	0	0	0	0	0	0	0	0	0	22382	29	13	2	0	0	0	0	0	0
	G	20	0	0	0	40759	17	18	0	0	0	0	0	0	0	0	0	0	0	0	0	0	29038	49	36	4	1	0	0	0	0	0	0	0	0	0	0	0	0	22364	33	27	0	2	0	0	0	0	0
	A	21	1	1	0	1480	39200	100	7	2	0	3	0	1	1	0	0	0	0	0	0	0	2823	26173	108	13	3	1	3	0	1	2	1	0	0	0	0	0	0	3399	18898	103	13	7	0	2	0	0	4
	A	22	0	0	0	39345	461	964	17	2	3	2	0	0	0	0	0	0	0	0	0	0	26419	831	1809	52	5	2	9	1	0	0	0	0	0	0	0	0	0	19322	875	2186	33	6	1	3	0	0	0
ES76i	A	23	0	1	1	39723	859	159	43	7	3	0	0	0	0	0	0	0	0	0	0	0	27398	1407	230	72	14	5	2	0	0	0	0	0	0	0	0	0	0	20412	1648	290	62	10	1	3	0	0	0
	A	24	0	0	0	40081	463	41	149	10	10	16	2	22	0	0	0	0	0	0	0	0	27856	861	97	222	25	11	22	5	29	0	0	0	0	0	0	0	0	21141	909	71	244	15	3	26	1	16	0
	A	25	0	0	0	39366	372	56	71	803	106	11	3	0	5	1	0	0	0	0	0	0	26402	676	73	142	1517	273	25	7	1	12	0	0	0	0	0	0	0	19439	671	97	172	1767	248	21	1	2	6
ES75i	G	26	0	4	4	38634	124	850	81	739	347	14	3	1	0	0	0	0	0	1	0	0	25304	220	1753	98	1093	653	4	3	0	0	0	0	0	0	0	0	0	18012	199	2090	104	1338	664	13	5	0	0
ES74i	G	27	0	8	8	38451	113	56	43	12	751	48	52	1106	35	17	16	59	27	5	2	1	25059	132	80	69	14	1630	65	92	1774	36	18	31	91	26	10	1	0	17748	128	66	50	28	1922	79	98	2073	36
	C	28	0	0	0	40611	112	39	18	10	1	3	0	0	0	0	0	0	0	0	0	0	28872	161	62	20	10	1	1	1	0	0	0	0	0	0	0	0	0	22243	108	44	13	8	6	4	0	0	0
	G	29	0	0	0	40757	22	8	7	0	0	0	0	0	0	0	0	0	0	0	0	0	29076	32	15	4	1	0	0	0	0	0	0	0	0	0	0	0	0	22388	22	10	5	0	0	1	0	0	0
ES73i	A	30	0	1	1	38453	2202	44	46	29	6	12	1	0	0	0	0	1	0	0	0	0	25090	3876	55	66	18	6	14	1	1	0	0	0	0	1	0	0	0	17812	4492	37	39	26	9	10	1	0	0
ES72i	G	31	0	1	1	38385	2234	84	35	28	3	0	3	2	2	0	14	3	1	0	0	0	25020	3898	114	46	29	5	1	0	1	2	3	8	1	0	0	0	0	17758	4531	79	35	6	1	2	0	1	0
ES71i	G	32	0	1	1	38435	2184	76	61	20	6	12	0	0	0	0	0	0	0	0	0	0	25068	3858	81	75	18	9	16	0	2	1	0	0	0	0	0	0	0	17848	4429	71	53	13	5	7	0	0	0
	A	33	0	0	0	40419	210	98	56	2	0	7	0	1	0	0	0	1	0	0	0	0	28716	200	114	69	11	8	10	0	0	0	0	0	0	0	0	0	0	22062	213	73	56	3	12	7	0	0	0
ES70d	G	34	6	5	-1	70	227	202	81	67	2157	37944	45	1	0	0	0	0	0	0	0	0	96	209	226	86	77	3719	24688	25	2	0	0	0	0	0	0	0	0	69	204	244	104	66	4221	17502	15	1	0
ES69i	A	35	0	1	1	38257	2442	33	26	14	12	9	0	1	0	0	0	0	0	0	0	0	24932	4045	41	48	26	13	19	0	4	0	0	0	0	0	0	0	0	17698	4630	21	33	13	11	15	0	4	1
ES68i	G	36	0	1	1	38291	2380	41	51	13	9	4	3	1	1	0	0	0	0	0	0	0	24960	4017	61	40	19	12	15	0	2	0	0	2	0	0	0	0	0	17686	4623	46	36	17	10	6	0	2	0
ES67d	G	37	1	0	-1	2419	38147	38	144	10	10	24	0	1	1	0	0	0	0	0	0	0	4019	24882	51	132	10	12	19	0	0	0	2	0	0	1	0	0	0	4646	17639	34	71	10	7	16	1	0	0
ES66i	G	38	0	2	2	38233	62	2371	25	9	2	7	7	74	3	1	0	0	0	0	0	0	24958	71	3981	21	18	4	2	11	56	5	0	0	1	0	0	0	0	17698	64	4607	16	9	1	4	4	22	1
ES65i	G	39	0	2	2	38134	210	2386	29	4	28	1	2	0	0	0	0	0	0	0	0	0	24864	196	3975	48	7	37	0	1	0	0	0	0	0	0	0	0	0	17655	126	4588	28	7	22	0	0	0	0
ES64i	A	40	0	3	3	38160	102	136	2321	18	1	52	2	0	0	1	1	0	0	0	0	0	24893	135	123	3908	7	2	57	3	0	0	0	0	0	0	0	0	0	17671	81	94	4536	10	2	32	0	0	0
	C	41	0	0	0	40431	199	126	31	4	2	0	0	0	1	0	0	0	0	0	0	0	28829	176	79	36	7	0	0	0	1	0	0	0	0	0	0	0	0	22213	129	57	22	3	2	0	0	0	0
ES63d	G	42	1	0	-1	3223	37548	17	6	0	0	0	0	0	0	0	0	0	0	0	0	0	4566	24537	20	4	0	0	1	0	0	0	0	0	0	0	0	0	0	4907	17510	8	0	0	0	1	0	0	0
ES62i	G	43	0	4	4	37955	222	112	162	2310	27	2	4	0	0	0	0	0	0	0	0	0	24807	148	103	141	3900	27	0	2	0	0	0	0	0	0	0	0	0	17628	100	87	81	4512	17	0	1	0	0
ES61i	A	44	0	4	4	37976	184	133	198	2297	6	0	0	0	0	0	0	0	0	0	0	0	24788	157	144	161	3872	5	1	0	0	0	0	0	0	0	0	0	0	17649	92	99	72	4510	4	0	0	0	0
ES60i	G	45	0	3	3	37417	117	121	2920	192	26	1	0	0	0	0	0	0	0	0	0	0	24454	101	68	4356	120	25	3	0	1	0	0	0	0	0	0	0	0	17457	59	56	4759	73	21	1	0	0	0
ES59i	A	46	0	4	4	37355	18	81	923	2403	8	5	0	0	1	0	0	0	0	0	0	0	24413	17	64	656	3969	8	1	0	0	0	0	0	0	0	0	0	0	17449	9	32	365	4561	6	4	0	0	0
ES58i	G	47	0	1	1	37325	2440	17	34	973	0	5	0	0	0	0	0	0	0	0	0	0	24377	3988	21	34	702	0	6	0	0	0	0	0	0	0	0	0	0	17418	4579	17	27	385	0	0	0	0	0
ES57i	A	48	0	2	2	37321	191	2452	17	806	5	2	0	0	0	0	0	0	0	0	0	0	24393	142	3987	7	599	0	0	0	0	0	0	0	0	0	0	0	0	17423	84	4582	6	331	0	0	0	0	0
ES56i	A	49	0	2	2	37292	36	3439	19	6	0	2	0	0	0	0	0	0	0	0	0	0	24348	41	4713	16	8	1	1	0	0	0	0	0	0	0	0	0	0	17406	21	4990	4	3	0	0	2	0	0
ES55i	A	50	0	1	1	37283	3283	219	4	2	1	2	0	0	0	0	0	0	0	0	0	0	24365	4597	159	2	4	0	0	1	0	0	0	0	0	0	0	0	0	17426	4926	68	4	2	0	0	0	0	0
ES54i	G	51	0	1	1	37291	3316	129	8	49	1	0	0	0	0	0	0	0	0	0	0	0	24373	4545	156	17	36	0	0	0	0	0	1	0	0	0	0	0	0	17441	4816	155	3	10	1	0	0	0	0
	A	52	0	0	0	40491	33	202	6	0	62	0	0	0	0	0	0	0	0	0	0	0	28866	36	156	16	0	49	0	3	2	0	0	0	0	0	0	0	0	22287	31	90	3	1	14	0	0	0	0
	G	53	0	0	0	40685	35	72	1	1	0	0	0	0	0	0	0	0	0	0	0	0	29023	42	59	1	0	1	0	1	1	0	0	0	0	0	0	0	0	22376	23	23	0	0	3	1	0	0	0
ES53i	C	54	0	1	1	38673	2110	6	3	2	0	0	0	0	0	0	0	0	0	0	0	0	25841	3277	6	3	0	0	0	0	0	0	1	0	0	0	0	0	0	18597	3823	6	0	0	0	0	0	0	0
	C	55	0	0	0	40779	10	3	2	0	0	0	0	0	0	0	0	0	0	0	0	0	29113	10	3	2	0	0	0	0	0	0	0	0	0	0	0	0	0	22418	4	4	0	0	0	0	0	0	0
	G	56	0	0	0	39630	1164	0	0	0	0	0	0	0	0	0	0	0	0	0	0	0	27846	1281	0	0	1	0	0	0	0	0	0	0	0	0	0	0	0	21417	1009	0	0	0	0	0	0	0	0
ES52d	C	57	2	0	-2	3712	178	36900	1	2	0	0	0	0	0	1	0	0	0	0	0	0	4932	139	24054	2	0	0	1	0	0	0	0	0	0	0	0	0	0	5080	58	17286	2	0	0	0	0	0	0
	G	58	0	0	0	40769	23	2	0	0	0	0	0	0	0	0	0	0	0	0	0	0	29101	26	1	0	0	0	0	0	0	0	0	0	0	0	0	0	0	22409	16	0	0	1	0	0	0	0	0
	A	59	0	0	0	40630	96	32	27	5	2	2	0	0	0	0	0	0	0	0	0	0	29000	65	26	30	0	6	1	0	0	0	0	0	0	0	0	0	0	22361	29	14	19	1	0	2	0	0	0
ES51i	G	60	0	2	2	37040	286	3421	40	1	2	1	3	0	0	0	0	0	0	0	0	0	24169	306	4605	43	2	0	0	3	0	0	0	0	0	0	0	0	0	17320	189	4876	39	0	0	0	2	0	0
	C	61	0	0	0	40632	138	14	9	1	0	0	0	0	0	0	0	0	0	0	0	0	28990	108	22	8	0	0	0	0	0	0	0	0	0	0	0	0	0	22372	42	3	9	0	0	0	0	0	0
	C	62	0	0	0	40789	2	2	1	0	0	0	0	0	0	0	0	0	0	0	0	0	29119	8	1	0	0	0	0	0	0	0	0	0	0	0	0	0	0	22425	1	0	0	0	0	0	0	0	0
	C	63	0	0	0	40686	107	1	0	0	0	0	0	0	0	0	0	0	0	0	0	0	29042	86	0	0	0	0	0	0	0	0	0	0	0	0	0	0	0	22385	41	0	0	0	0	0	0	0	0
	A	64	0	0	0	40614	174	4	2	0	0	0	0	0	0	0	0	0	0	0	0	0	28943	171	4	7	1	2	0	0	0	0	0	0	0	0	0	0	0	22340	83	3	0	0	0	0	0	0	0
	G	65	0	0	0	40444	83	180	78	2	3	0	0	4	0	0	0	0	0	0	0	0	28713	118	166	120	1	2	2	1	5	0	0	0	0	0	0	0	0	22239	54	79	53	0	0	1	0	0	0
ES50i	C	66	0	2	2	37786	104	2872	12	3	15	0	1	1	0	0	0	0	0	0	0	0	25215	99	3791	10	2	11	0	0	0	0	0	0	0	0	0	0	0	18294	55	4056	9	1	11	0	0	0	0
	C	67	0	0	0	39839	933	19	3	0	0	0	0	0	0	0	0	0	0	0	0	0	27968	1125	33	2	0	0	0	0	0	0	0	0	0	0	0	0	0	21434	973	19	0	0	0	0	0	0	0
	G	68	0	0	0	39855	864	35	40	0	0	0	0	0	0	0	0	0	0	0	0	0	28042	1022	35	28	1	0	0	0	0	0	0	0	0	0	0	0	0	21475	921	24	5	0	0	0	0	0	1
	G	69	0	0	0	38566	341	1760	51	15	56	1	3	1	0	0	0	0	0	0	0	0	27114	318	1549	50	27	65	1	4	0	0	0	0	0	0	0	0	0	21396	154	822	14	14	23	0	3	0	0
ES49i	A	70	0	1	1	36190	4286	261	37	9	5	1	3	2	0	0	0	0	0	0	0	0	23495	5306	285	21	13	5	3	0	0	0	0	0	0	0	0	0	0	16963	5267	169	17	3	3	3	1	0	0
	A	71	0	0	0	38652	195	181	151	1544	55	11	1	4	0	0	0	0	0	0	0	0	27239	212	148	149	1326	44	9	0	1	0	0	0	0	0	0	0	0	21478	117	95	61	656	13	5	1	0	0
	C	72	0	0	0	40474	294	18	6	1	0	0	0	0	1	0	0	0	0	0	0	0	28804	308	8	5	0	1	0	1	0	0	0	1	0	0	0	0	0	22219	195	8	4	0	0	0	0	0	0
	C	73	0	0	0	40662	112	14	5	1	0	0	0	0	0	0	0	0	0	0	0	0	28972	130	23	3	0	0	0	0	0	0	0	0	0	0	0	0	0	22323	90	6	6	1	0	0	0	0	0
	G	74	0	0	0	40664	42	81	5	2	0	0	0	0	0	0	0	0	0	0	0	0	29009	29	83	6	1	0	0	0	0	0	0	0	0	0	0	0	0	22341	21	59	4	1	0	0	0	0	0
	A	75	0	0	0	40065	250	136	80	25	231	6	0	1	0	0	0	0	0	0	0	0	28387	239	148	75	21	247	11	0	0	0	0	0	0	0	0	0	0	21993	130	119	53	11	110	7	3	0	0
	C	76	0	0	0	40170	317	90	170	39	6	0	2	0	0	0	0	0	0	0	0	0	28615	331	53	93	34	1	0	1	0	0	0	0	0	0	0	0	0	22073	210	49	81	10	1	0	2	0	0
	G	77	0	0	0	40701	80	3	10	0	0	0	0	0	0	0	0	0	0	0	0	0	29057	59	7	5	0	0	0	0	0	0	0	0	0	0	0	0	0	22374	41	5	3	2	1	0	0	0	0
ES48i	G	78	0	1	1	36126	4141	203	279	21	15	2	5	1	1	0	0	0	0	0	0	0	23394	5217	189	300	12	9	2	3	1	0	0	1	0	0	0	0	0	16920	5259	84	146	8	7	1	1	0	0
ES47i	A	79	0	1	1	35754	3770	673	499	31	41	8	8	0	0	1	2	5	2	0	0	0	23202	4878	550	428	28	27	5	5	1	0	2	2	0	0	0	0	0	16771	5043	301	283	8	12	4	1	0	1
ES46i	G	80	0	2	2	35393	1720	3479	121	9	15	6	35	1	14	1	0	0	0	0	0	0	22829	1586	4560	102	6	14	5	19	0	7	0	0	0	0	0	0	0	16719	789	4839	50	8	7	4	5	0	5
ES45i	A	81	0	1	1	36352	4135	169	77	27	22	3	1	7	0	0	1	0	0	0	0	0	23719	5099	198	67	18	11	7	0	9	0	0	0	0	0	0	0	0	17085	5123	126	66	10	7	3	1	5	0
ES44i	G	82	0	1	1	31699	8138	485	269	21	39	136	4	0	1	1	0	1	0	0	0	0	19624	8578	526	308	25	17	48	1	0	0	1	0	0	0	0	0	0	14956	6918	272	165	21	19	74	0	1	0
	C	83	0	0	0	39796	654	151	183	8	2	0	0	0	0	0	0	0	0	0	0	0	28322	505	113	175	9	2	2	0	0	0	0	0	0	0	0	0	0	21884	370	83	87	1	0	0	1	0	0
ES43d	C	84	2	0	-2	10295	703	29759	30	5	0	2	0	0	0	0	0	0	0	0	0	0	10705	503	17901	17	1	1	0	0	0	0	0	0	0	0	0	0	0	8151	339	13920	14	2	0	0	0	0	0
ES42d	G	85	4	0	-4	11701	446	126	145	28355	18	1	2	0	0	0	0	0	0	0	0	0	11739	340	91	104	16842	12	0	0	0	0	0	0	0	0	0	0	0	8845	234	68	76	13199	4	0	0	0	0
ES41i	A	86	0	1	1	31835	7492	1238	89	121	13	5	0	1	0	0	0	0	0	0	0	0	19591	7947	1350	79	140	16	4	0	0	0	0	0	0	1	0	0	0	15130	6414	737	59	75	10	1	0	0	0
ES40i	A	87	0	4	4	31214	836	1205	523	6957	48	9	2	0	0	0	0	0	0	0	0	0	19135	765	1292	438	7461	33	2	0	2	0	0	0	0	0	0	0	0	14911	444	689	263	6078	38	2	1	0	0
ES39i	A	88	1	3	2	2453	29962	489	7565	258	46	14	1	3	1	0	1	0	1	0	0	0	2364	18104	380	7995	236	31	14	0	3	1	0	0	0	0	0	0	0	1445	14130	259	6450	120	12	3	3	3	1
ES38i	A	89	0	1	1	29036	8579	1730	1106	163	88	26	64	2	0	0	0	0	0	0	0	0	17446	8663	1490	1232	130	89	27	48	3	0	0	0	0	0	0	0	0	13652	6992	964	632	90	59	4	31	2	0
ES37i	A	90	0	1	1	30046	8175	1302	384	256	226	111	86	204	3	0	1	0	0	0	0	0	18109	8560	1317	344	257	210	84	89	157	1	0	0	0	0	0	0	0	14295	6764	737	236	113	109	43	49	79	1
	A	91	0	0	0	36149	1123	2232	722	239	73	242	7	5	1	0	0	1	0	0	0	0	25315	989	1573	754	225	70	197	1	1	2	0	0	1	0	0	0	0	19834	613	1219	474	130	50	97	2	7	0
ES36i	G	92	0	4	4	28948	2849	679	1557	6554	114	61	8	4	9	8	1	1	0	0	1	0	17519	2224	561	1504	7132	124	39	1	11	5	7	0	0	1	0	0	0	13684	1531	431	877	5782	60	38	4	8	6
ES35i	G	93	0	3	3	30798	2050	698	6688	436	107	7	5	3	1	0	0	0	0	1	0	0	18693	1921	740	7260	418	84	8	3	0	0	1	0	0	0	0	0	0	14621	1187	430	5919	212	47	8	1	1	0
	G	94	0	0	0	36877	2549	365	475	384	76	32	32	4	0	0	0	0	0	0	0	0	25584	2344	306	418	362	58	26	23	2	3	0	1	1	0	0	0	0	20301	1346	174	309	214	39	20	22	1	0
	A	95	0	0	0	36172	2110	1488	335	130	80	43	63	27	314	29	3	0	0	0	0	0	24824	2219	1262	308	109	54	44	51	26	206	22	3	0	0	0	0	0	19857	1233	863	205	56	33	25	24	23	91
ES34i	G	96	0	1	1	30983	7555	1347	740	68	43	26	11	6	12	0	1	2	0	0	0	0	19245	7910	1108	728	79	25	10	10	3	8	0	2	0	0	0	0	0	14784	6384	711	459	27	31	15	5	1	8
ES33i	G	97	0	2	2	25903	1242	10000	2369	775	155	211	128	7	2	1	0	1	0	0	0	0	14903	931	10247	1948	669	122	195	109	4	0	0	0	0	0	0	0	0	11895	644	7797	1408	386	104	100	87	3	1
	C	98	0	0	0	34428	4300	276	1700	63	12	6	8	1	0	0	0	0	0	0	0	0	23390	3964	188	1516	60	4	1	4	0	0	1	0	0	0	0	0	0	18791	2544	236	796	48	5	1	5	0	0
	G	99	0	0	0	36208	1586	66	2908	18	5	3	0	0	0	0	0	0	0	0	0	0	24651	1408	43	2993	28	4	1	0	0	0	0	0	0	0	0	0	0	19832	745	47	1788	13	1	0	0	0	0
ES32i	G	100	0	2	2	24723	5870	9258	222	413	38	29	13	202	23	1	2	0	0	0	0	0	14108	5420	8965	191	212	37	13	6	154	22	0	0	0	0	0	0	0	11225	3436	7139	122	339	20	17	7	109	9
ES31i	G	101	0	8	8	24521	5238	1575	126	439	84	196	189	8222	195	8	0	1	0	0	0	0	13944	4889	1076	95	246	75	143	210	8308	135	7	0	0	0	0	0	0	11124	2959	1036	121	342	83	137	164	6343	113
ES30i	G	102	0	2	2	24869	321	14120	602	826	47	5	4	0	0	0	0	0	0	0	0	0	14243	193	13711	499	440	31	4	3	1	3	0	0	0	0	0	0	0	11324	260	9820	412	581	21	3	2	3	0
ES29i	A	103	0	4	4	28754	1374	514	621	9434	34	57	2	3	0	1	0	0	0	0	0	0	18294	728	305	393	9351	21	32	4	0	0	0	0	0	0	0	0	0	13338	1068	403	391	7184	23	16	2	1	0
ES28i	G	104	0	2	2	25497	5085	9618	501	26	17	7	40	3	0	0	0	0	0	0	0	0	14467	4787	9332	457	24	31	1	26	2	0	1	0	0	0	0	0	0	11867	2809	7389	296	20	17	4	19	3	0
	G	105	0	0	0	34443	1337	343	4516	52	82	4	16	0	0	1	0	0	0	0	0	0	23443	948	210	4464	17	43	0	2	0	0	0	1	0	0	0	0	0	18932	827	203	2364	32	64	2	2	0	0
ES27i	A	106	0	3	3	27894	898	657	10843	50	440	4	3	3	0	2	0	0	0	0	0	0	17849	541	398	9892	26	412	5	0	2	1	1	1	0	0	0	0	0	12557	574	510	8489	35	246	1	0	11	0
	G	107	0	0	0	33089	5258	2011	206	90	73	3	11	10	38	5	0	0	0	0	0	0	22635	4988	1259	97	62	61	2	4	3	17	0	0	0	0	0	0	0	18489	2665	1047	110	37	46	7	7	2	15
ES26i	A	108	0	2	2	25867	2853	11793	159	80	11	11	18	2	0	0	0	0	0	0	0	0	16810	1743	10419	93	33	5	8	11	2	4	0	0	0	0	0	0	0	11599	1520	9177	78	36	8	2	4	2	0
ES25i	G	109	0	1	1	20972	17152	1935	551	103	25	7	8	41	0	0	0	0	0	0	0	0	12111	15253	1157	480	71	28	3	6	18	0	1	0	0	0	0	0	0	9190	11868	927	330	65	13	5	4	22	1
ES24d	C	110	3	1	-2	3231	18074	362	19075	33	17	1	0	0	1	0	0	0	0	0	0	0	1884	15933	232	11046	17	11	3	0	0	0	1	1	0	0	0	0	0	1794	12472	238	7876	16	24	5	0	0	1
	A	111	0	0	0	40511	168	88	27	0	0	0	0	0	0	0	0	0	0	0	0	0	28952	85	56	32	3	0	0	0	0	0	0	0	0	0	0	0	0	22238	117	56	14	0	0	0	1	0	0
ES23i	A	112	0	2	2	21572	2502	16307	192	128	63	13	17	0	0	0	0	0	0	0	0	0	12495	1569	14837	94	87	26	12	8	0	0	0	0	0	0	0	0	0	9108	1552	11554	93	56	42	16	5	0	0
Es22i	A	113	0	3	3	20484	2100	730	16749	520	162	31	13	2	1	0	0	2	0	0	0	0	11991	1305	436	14879	378	104	22	3	1	0	1	2	6	0	0	0	0	8966	1168	475	11390	291	112	16	7	0	1
Es21i	A	114	0	2	2	18884	1369	18283	1425	203	133	267	26	182	5	2	9	5	1	0	0	0	10886	881	15977	894	112	98	158	11	92	4	3	4	5	3	0	0	0	7910	832	12323	813	128	70	219	14	101	2
ES20i	A	115	0	1	1	18663	17956	2110	967	651	222	87	101	19	2	0	4	10	2	0	0	0	10798	15621	1300	746	346	179	55	67	10	0	1	2	1	1	1	0	0	7680	12236	1116	652	425	169	64	64	11	3
	G	116	0	0	0	34076	2763	1830	607	542	351	78	236	205	27	5	22	44	7	1	0	0	25025	1598	1104	453	346	228	51	142	106	20	6	14	29	6	0	0	0	18397	1469	1141	417	385	247	49	115	146	24
	A	117	0	0	0	35750	2340	619	797	402	230	218	63	38	42	26	73	166	28	2	0	0	25910	1386	400	602	254	159	152	27	24	28	18	48	105	12	3	0	0	19107	1376	456	592	246	151	143	55	36	30
ES19d	G	118	3	0	-3	19620	3046	683	16574	147	362	303	15	12	6	1	10	11	4	0	0	0	16480	1885	409	9736	79	285	213	5	10	2	2	6	13	3	0	0	0	13030	1946	435	6531	97	187	154	15	4	5
	G	119	0	0	0	35106	2935	787	1238	412	273	12	10	19	2	0	0	0	0	0	0	0	25394	1756	464	995	290	201	10	7	9	1	0	0	1	0	0	0	0	18607	2030	494	816	292	162	8	9	8	0
	G	120	0	0	0	35648	2104	990	1437	144	435	8	25	1	2	0	0	0	0	0	0	0	25606	1379	715	922	77	397	9	16	4	2	1	0	0	0	0	0	0	18849	1421	723	1025	94	295	5	11	2	1
	G	121	1	1	0	2150	33529	2713	774	408	1104	83	26	3	4	0	0	0	0	0	0	0	1381	24585	1621	503	263	711	47	11	3	1	0	1	1	0	0	0	0	1489	17673	1516	537	298	870	25	16	0	2
	G	122	0	0	0	34586	3961	1243	530	116	306	22	25	3	2	0	0	0	0	0	0	0	24930	2697	824	382	69	201	9	11	1	4	0	0	0	0	0	0	0	18175	2748	772	385	95	224	19	7	0	1
ES18i	G	123	0	1	1	17582	21755	434	442	63	80	121	309	5	3	0	0	0	0	0	0	0	10306	17952	238	217	37	59	88	229	1	1	0	0	0	0	0	0	0	6968	14493	300	243	48	38	102	224	5	3
	G	124	0	0	0	34362	5236	188	181	405	41	22	347	7	4	1	0	0	0	0	0	0	25035	3340	86	134	353	21	21	133	3	1	0	1	0	0	0	0	0	18279	3401	125	125	318	34	18	118	3	3
ES17i	G	125	0	4	4	16758	587	5211	454	17355	221	203	3	2	0	0	0	0	0	0	0	0	9921	299	3492	291	14828	153	137	2	5	0	0	0	0	0	0	0	0	6885	373	3159	286	11452	110	154	4	3	0
ES16i	G	126	0	2	2	15206	1078	24461	31	4	4	3	7	0	0	0	0	0	0	0	0	0	8958	742	19398	23	4	1	1	1	0	0	0	0	0	0	0	0	0	5541	667	16176	29	6	1	3	2	1	0
	A	127	0	0	0	32933	3160	2467	1863	18	337	12	4	0	0	0	0	0	0	0	0	0	24141	2104	1555	1170	9	139	7	2	1	0	0	0	0	0	0	0	0	17410	1899	1828	1170	3	113	2	0	0	0
ES15i	A	128	0	3	3	14573	5037	228	20892	17	22	24	1	0	0	0	0	0	0	0	0	0	8536	3302	109	17159	3	5	13	1	0	0	0	0	0	0	0	0	0	5162	3020	145	14065	6	13	15	0	0	0
	C	129	0	0	0	36829	3277	296	363	21	2	3	1	0	0	2	0	0	0	0	0	0	27041	1750	166	155	15	0	0	0	0	0	1	0	0	0	0	0	0	20936	1241	134	102	12	0	0	1	0	0
	C	130	0	0	0	39768	702	186	14	119	3	0	2	0	0	0	0	0	0	0	0	0	28575	406	72	6	68	1	0	0	0	0	0	0	0	0	0	0	0	21847	369	154	4	52	0	0	0	0	0
	C	131	0	0	0	40525	140	124	3	1	1	0	0	0	0	0	0	0	0	0	0	0	28963	105	55	5	0	0	0	0	0	0	0	0	0	0	0	0	0	22202	124	94	2	2	2	0	0	0	0
ES14d	G	132	3	0	-3	27548	3581	217	9419	10	10	2	2	2	3	0	0	0	0	0	0	0	20813	2372	144	5788	4	5	0	1	1	0	0	0	0	0	0	0	0	16733	1568	105	3998	5	10	4	0	3	0
ES13d	G	133	4	0	-4	25558	1728	2091	635	10752	19	5	0	3	2	1	0	0	0	0	0	0	19748	1046	1225	404	6698	4	1	1	1	0	0	0	0	0	0	0	0	15150	771	1263	272	4953	12	3	1	1	0
ES12i	G	134	0	1	1	13646	19427	357	7334	17	9	3	0	1	0	0	0	0	0	0	0	0	8446	15974	174	4528	2	4	0	0	0	0	0	0	0	0	0	0	0	5638	12187	214	4376	9	1	1	0	0	0
ES11d	A	135	2	1	-1	865	25402	6365	296	7819	12	31	4	0	0	0	0	0	0	0	0	0	619	19553	3970	193	4772	7	10	3	1	0	0	0	0	0	0	0	0	460	15094	2029	157	4664	1	19	1	1	0
	A	136	0	0	0	25770	14758	70	119	24	11	9	2	2	3	24	2	0	0	0	0	0	19945	9056	50	52	8	2	5	0	0	2	7	1	0	0	0	0	0	14249	8072	25	41	9	7	3	0	3	5
	A	137	0	0	0	32197	448	8070	53	15	1	5	5	0	0	0	0	0	0	0	0	0	23955	243	4904	19	4	1	1	1	0	0	0	0	0	0	0	0	0	17317	286	4786	19	5	4	1	8	0	0
	G	138	0	0	0	32289	282	8136	13	67	6	0	0	1	0	0	0	0	0	0	0	0	24001	148	4944	5	27	3	0	0	0	0	0	0	0	0	0	0	0	17421	145	4827	7	26	0	0	0	0	0
ES10i	A	139	0	1	1	13025	27675	54	30	8	2	0	0	0	0	0	0	0	0	0	0	0	8193	20877	30	16	9	0	2	1	0	0	0	0	0	0	0	0	0	5218	17160	27	12	7	1	0	1	0	0
ES9i	A	140	0	2	2	6120	7427	27206	16	5	10	1	1	1	0	1	2	3	1	0	0	0	3974	4523	20601	15	6	5	0	0	0	0	0	2	2	0	0	0	0	1849	3646	16903	18	4	2	0	1	0	1
ES8i	A	141	0	1	1	12960	19053	6731	1854	190	6	0	0	0	0	0	0	0	0	0	0	0	7983	15611	4210	1235	89	0	0	0	0	0	0	0	0	0	0	0	0	6733	12063	3208	341	80	1	0	0	0	0
	C	142	0	0	0	24200	980	15504	24	75	2	9	0	0	0	0	0	0	0	0	0	0	19029	625	9406	16	50	1	1	0	0	0	0	0	0	0	0	0	0	13582	589	8218	8	25	1	3	0	0	0
	A	143	0	0	0	40747	33	11	2	1	0	0	0	0	0	0	0	0	0	0	0	0	29110	16	1	1	0	0	0	0	0	0	0	0	0	0	0	0	0	22405	17	4	0	0	0	0	0	0	0
ES7d	C	144	1	0	-1	37640	3102	27	3	21	0	1	0	0	0	0	0	0	0	0	0	0	27033	2070	16	2	6	0	0	1	0	0	0	0	0	0	0	0	0	21336	1072	10	1	7	0	0	0	0	0
	G	145	0	0	0	40655	126	13	0	0	0	0	0	0	0	0	0	0	0	0	0	0	29038	76	13	1	0	0	0	0	0	0	0	0	0	0	0	0	0	22372	44	10	0	0	0	0	0	0	0
ES6d	A	146	3	1	-2	8151	27242	2936	2342	123	0	0	0	0	0	0	0	0	0	0	0	0	4910	20600	1861	1696	60	0	1	0	0	0	0	0	0	0	0	0	0	4912	15856	982	645	31	0	0	0	0	0
ES5i	G	147	0	2	2	4939	152	35683	6	7	3	0	0	4	0	0	0	0	0	0	0	0	3318	84	25720	3	0	0	0	0	3	0	0	0	0	0	0	0	0	1425	111	20878	4	0	2	0	0	6	0
ES4i	A	148	0	1	1	4755	36000	27	8	0	3	0	1	0	0	0	0	0	0	0	0	0	3233	25882	11	2	0	0	0	0	0	0	0	0	0	0	0	0	0	1342	21077	3	2	2	0	0	0	0	0
	A	149	0	0	0	40764	9	15	2	0	1	1	2	0	0	0	0	0	0	0	0	0	29115	7	6	0	0	0	0	0	0	0	0	0	0	0	0	0	0	22410	7	5	1	1	1	1	0	0	0
	G	150	0	0	0	40769	3	12	7	3	0	0	0	0	0	0	0	0	0	0	0	0	29112	3	7	5	1	0	0	0	0	0	0	0	0	0	0	0	0	22410	5	7	3	1	0	0	0	0	0
ES3i	A	151	0	2	2	1569	19	39203	3	0	0	0	0	0	0	0	0	0	0	0	0	0	1285	14	27826	2	0	0	0	1	0	0	0	0	0	0	0	0	0	411	13	21999	3	0	0	0	0	0	0
	G	152	0	0	0
	A	153	0	0	0
ES2d	A	154	4	3	-1
	G	155	0	0	0
	A	156	0	0	0
ES1i	A	157	0	1	1
	A	158	1	1	0
	A	159	0	0	0
	G	160	0	0	0
	A	161	0	0	0
	A	162	1	1	0
3' end	G	163	1	1	0
Total
[truncated: 7 more columns]

## Sheet: RPS12_F1RNAi RESC6-IP 0-4Day R1
RPS12_KH2F1-RNAi_RESC6-IP_0-4 Day_R1
						J07 - F1 RNAi 0Day RESC6 IP																	J08 - F1 RNAi 3Day RESC6 IP																	J09 - F1 RNAi 4Day RESC6 IP
			no of Ts present before that position			# reads with indicated # Ts present before that position																	# reads with indicated # Ts present before that position																	# reads with indicated # Ts present before that position
	sequence	T-stripped	pre-edited	edited	editing events; del = -; ins = +	0	1	2	3	4	5	6	7	8	9	10	11	12	13	14	15	16	0	1	2	3	4	5	6	7	8	9	10	11	12	13	14	15	16	0	1	2	3	4	5	6	7	8	9
	C	1
5' end	A	2
	A	3
	A	4
	C	5
	A	6
	C	7
	G	8
	A	9
	A	10
	A	11						0.05
	C	12						0.1
	A	13						0.2
	A	14						0.3
	A	15
	C	16	0	0	0	26135	0	0	0	0	0	0	0	0	0	0	0	0	0	0	0	0	19254	0	0	0	0	0	0	0	0	0	0	0	0	0	0	0	0	46531	0	0	0	0	0	0	0	0	0
	A	17	1	1	0	167	25968	0	0	0	0	0	0	0	0	0	0	0	0	0	0	0	144	19108	0	1	1	0	0	0	0	0	0	0	0	0	0	0	0	138	46393	0	0	0	0	0	0	0	0
	A	18	0	0	0	26108	16	6	5	0	0	0	0	0	0	0	0	0	0	0	0	0	19240	7	4	3	0	0	0	0	0	0	0	0	0	0	0	0	0	46522	4	3	2	0	0	0	0	0	0
	A	19	0	0	0	26059	31	43	2	0	0	0	0	0	0	0	0	0	0	0	0	0	19214	22	17	0	1	0	0	0	0	0	0	0	0	0	0	0	0	46497	16	15	3	0	0	0	0	0	0
	G	20	0	0	0	26019	59	52	4	1	0	0	0	0	0	0	0	0	0	0	0	0	19220	18	16	0	0	0	0	0	0	0	0	0	0	0	0	0	0	46508	12	9	1	0	1	0	0	0	0
	A	21	1	1	0	5367	20555	178	19	8	2	2	0	0	2	2	0	0	0	0	0	0	2585	16589	74	1	0	0	2	1	0	2	0	0	0	0	0	0	0	1970	44518	39	3	0	0	1	0	0	0
	A	22	0	0	0	21330	1375	3359	56	4	5	6	0	0	0	0	0	0	0	0	0	0	17433	636	1169	8	3	0	3	2	0	0	0	0	0	0	0	0	0	45167	469	880	8	2	3	2	0	0	0
ES76i	A	23	0	1	1	22889	2675	436	120	12	0	2	1	0	0	0	0	0	0	0	0	0	17607	1453	154	32	8	0	0	0	0	0	0	0	0	0	0	0	0	45345	1063	92	25	4	1	1	0	0	0
	A	24	0	0	0	23930	1602	111	385	26	11	34	5	31	0	0	0	0	0	0	0	0	18356	634	48	198	5	1	4	0	8	0	0	0	0	0	0	0	0	45850	504	29	129	4	3	8	0	4	0
	A	25	0	0	0	21364	1255	134	237	2681	432	22	0	0	9	0	1	0	0	0	0	0	17417	526	42	77	1008	177	4	2	0	1	0	0	0	0	0	0	0	45176	413	21	56	751	108	2	0	1	3
ES75i	G	26	0	4	4	19171	286	3126	189	2120	1203	29	11	0	0	0	0	0	0	0	0	0	16270	169	1174	59	1033	537	7	3	0	2	0	0	0	0	0	0	0	44289	102	896	41	771	423	6	2	0	0
ES74i	G	27	0	8	8	18723	172	114	94	37	2884	121	188	3437	77	17	53	151	50	13	4	0	16047	203	47	47	18	1004	71	58	1543	35	16	10	112	33	8	2	0	44143	182	32	54	16	722	54	68	1114	25
	C	28	0	0	0	25850	191	61	15	11	3	4	0	0	0	0	0	0	0	0	0	0	19054	173	16	6	2	0	2	0	0	0	0	0	0	0	1	0	0	46345	166	12	0	7	1	0	0	0	0
	G	29	0	0	0	26065	32	27	9	1	0	1	0	0	0	0	0	0	0	0	0	0	19220	17	10	4	1	1	1	0	0	0	0	0	0	0	0	0	0	46514	6	8	3	0	0	0	0	0	0
ES73i	A	30	0	1	1	18782	7164	71	70	26	9	13	0	0	0	0	0	0	0	0	0	0	16220	2960	28	26	9	4	5	0	0	2	0	0	0	0	0	0	0	44323	2157	19	21	7	1	2	0	0	0
ES72i	G	31	0	1	1	18748	7181	96	62	20	5	1	1	0	1	4	10	6	0	0	0	0	16128	3045	27	33	12	2	0	0	0	0	2	2	2	1	0	0	0	44218	2252	26	17	8	1	1	1	1	1
ES71i	G	32	0	1	1	18876	7052	83	66	32	11	15	0	0	0	0	0	0	0	0	0	0	16182	2914	38	102	8	5	5	0	0	0	0	0	0	0	0	0	0	44277	2095	33	113	8	3	2	0	0	0
	A	33	0	0	0	25574	344	93	94	9	4	16	0	1	0	0	0	0	0	0	0	0	18777	311	108	36	11	8	2	0	1	0	0	0	0	0	0	0	0	46037	321	133	33	3	1	1	0	1	1
ES70d	G	34	6	5	-1	80	269	354	122	104	6755	18427	23	1	0	0	0	0	0	0	0	0	63	203	292	83	79	2754	15764	14	2	0	0	0	0	0	0	0	0	71	236	310	121	87	2042	43612	51	0	1
ES69i	A	35	0	1	1	18660	7342	33	41	12	19	23	2	3	0	0	0	0	0	0	0	0	16023	3176	11	22	9	3	10	0	0	0	0	0	0	0	0	0	0	44119	2361	18	13	8	2	7	1	2	0
ES68i	G	36	0	1	1	18679	7312	61	48	20	7	5	2	0	0	0	1	0	0	0	0	0	16048	3149	26	18	6	5	1	0	1	0	0	0	0	0	0	0	0	44125	2344	34	16	4	6	1	1	0	0
ES67d	G	37	1	0	-1	7341	18605	31	126	4	5	19	0	0	0	3	1	0	0	0	0	0	3264	15884	22	64	4	5	6	0	0	0	5	0	0	0	0	0	0	2520	43913	19	65	3	1	9	1	0	0
ES66i	G	38	0	2	2	18699	65	7286	15	10	2	7	6	45	0	0	0	0	0	0	0	0	15994	55	3152	13	1	4	0	1	30	3	0	0	1	0	0	0	0	44060	74	2333	14	6	0	0	1	42	1
ES65i	G	39	0	2	2	18609	174	7253	57	4	38	0	0	0	0	0	0	0	0	0	0	0	15896	172	3133	25	4	24	0	0	0	0	0	0	0	0	0	0	0	43969	192	2340	12	1	15	2	0	0	0
ES64i	A	40	0	3	3	18647	133	109	7180	7	2	54	3	0	0	0	0	0	0	0	0	0	15985	102	86	3048	12	4	16	1	0	0	0	0	0	0	0	0	0	44114	117	54	2226	7	2	10	1	0	0
	C	41	0	0	0	25892	162	54	24	3	0	0	0	0	0	0	0	0	0	0	0	0	19090	102	45	15	2	0	0	0	0	0	0	0	0	0	0	0	0	46355	106	58	8	3	1	0	0	0	0
ES63d	G	42	1	0	-1	7695	18422	11	6	0	0	1	0	0	0	0	0	0	0	0	0	0	3841	15406	5	0	2	0	0	0	0	0	0	0	0	0	0	0	0	3390	43134	5	1	1	0	0	0	0	0
ES62i	G	43	0	4	4	18616	115	107	115	7162	18	0	2	0	0	0	0	0	0	0	0	0	16283	113	59	59	2727	11	0	1	1	0	0	0	0	0	0	0	0	44470	108	54	51	1845	3	0	0	0	0
ES61i	A	44	0	4	4	18639	111	119	131	7131	3	1	0	0	0	0	0	0	0	0	0	0	16085	159	177	127	2702	2	0	2	0	0	0	0	0	0	0	0	0	44204	186	187	119	1833	1	0	1	0	0
ES60i	G	45	0	3	3	18357	74	67	7481	127	27	2	0	0	0	0	0	0	0	0	0	0	15439	139	47	3557	64	7	0	1	0	0	0	0	0	0	0	0	0	43297	177	62	2931	57	6	1	0	0	0
ES59i	A	46	0	4	4	18348	15	30	521	7217	2	2	0	0	0	0	0	0	0	0	0	0	15432	21	26	864	2908	3	0	0	0	0	0	0	0	0	0	0	0	43331	19	39	1101	2038	3	0	0	0	0
ES58i	G	47	0	1	1	18319	7232	24	32	525	0	3	0	0	0	0	0	0	0	0	0	0	15448	2911	22	40	828	4	1	0	0	0	0	0	0	0	0	0	0	43374	2053	40	60	1002	0	1	0	1	0
ES57i	A	48	0	2	2	18330	120	7239	8	436	1	0	0	0	1	0	0	0	0	0	0	0	15493	161	2876	23	701	0	0	0	0	0	0	0	0	0	0	0	0	43516	160	2010	49	796	0	0	0	0	0
ES56i	A	49	0	2	2	18305	33	7777	12	6	0	1	1	0	0	0	0	0	0	0	0	0	15521	37	3691	1	4	0	0	0	0	0	0	0	0	0	0	0	0	43602	39	2882	8	0	0	0	0	0	0
ES55i	A	50	0	1	1	18317	7702	111	2	3	0	0	0	0	0	0	0	0	0	0	0	0	15546	3558	143	5	2	0	0	0	0	0	0	0	0	0	0	0	0	43635	2736	159	0	1	0	0	0	0	0
ES54i	G	51	0	1	1	18371	7526	225	3	9	0	0	0	0	1	0	0	0	0	0	0	0	15493	3600	147	3	11	0	0	0	0	0	0	0	0	0	0	0	0	43348	3041	122	3	17	0	0	0	0	0
	A	52	0	0	0	25930	59	122	3	3	18	0	0	0	0	0	0	0	0	0	0	0	19031	65	137	3	0	18	0	0	0	0	0	0	0	0	0	0	0	46321	55	127	0	1	25	1	0	0	0
	G	53	0	0	0	26090	18	25	2	0	0	0	0	0	0	0	0	0	0	0	0	0	19229	7	18	0	0	0	0	0	0	0	0	0	0	0	0	0	0	46495	5	29	0	0	0	2	0	0	0
ES53i	C	54	0	1	1	20095	6032	5	0	2	1	0	0	0	0	0	0	0	0	0	0	0	17350	1899	5	0	0	0	0	0	0	0	0	0	0	0	0	0	0	45153	1371	7	0	0	0	0	0	0	0
	C	55	0	0	0	26129	5	1	0	0	0	0	0	0	0	0	0	0	0	0	0	0	19243	4	7	0	0	0	0	0	0	0	0	0	0	0	0	0	0	46505	13	13	0	0	0	0	0	0	0
	G	56	0	0	0	24588	1547	0	0	0	0	0	0	0	0	0	0	0	0	0	0	0	17763	1490	1	0	0	0	0	0	0	0	0	0	0	0	0	0	0	45306	1222	1	0	2	0	0	0	0	0
ES52d	C	57	2	0	-2	7914	63	18153	5	0	0	0	0	0	0	0	0	0	0	0	0	0	3968	51	15233	0	1	1	0	0	0	0	0	0	0	0	0	0	0	3614	73	42844	0	0	0	0	0	0	0
	G	58	0	0	0	26119	16	0	0	0	0	0	0	0	0	0	0	0	0	0	0	0	19251	2	1	0	0	0	0	0	0	0	0	0	0	0	0	0	0	46526	3	2	0	0	0	0	0	0	0
	A	59	0	0	0	26048	40	16	20	4	1	2	3	1	0	0	0	0	0	0	0	0	19210	27	10	6	0	0	0	1	0	0	0	0	0	0	0	0	0	46473	46	8	2	1	0	1	0	0	0
ES51i	G	60	0	2	2	18222	260	7616	36	1	0	0	0	0	0	0	0	0	0	0	0	0	15287	278	3681	5	0	0	3	0	0	0	0	0	0	0	0	0	0	42936	370	3213	9	0	0	3	0	0	0
	C	61	0	0	0	26059	56	8	11	1	0	0	0	0	0	0	0	0	0	0	0	0	19208	35	7	4	0	0	0	0	0	0	0	0	0	0	0	0	0	46469	54	4	3	0	1	0	0	0	0
	C	62	0	0	0	26133	1	1	0	0	0	0	0	0	0	0	0	0	0	0	0	0	19254	0	0	0	0	0	0	0	0	0	0	0	0	0	0	0	0	46531	0	0	0	0	0	0	0	0	0
	C	63	0	0	0	26080	53	2	0	0	0	0	0	0	0	0	0	0	0	0	0	0	19208	44	0	2	0	0	0	0	0	0	0	0	0	0	0	0	0	46482	49	0	0	0	0	0	0	0	0
	A	64	0	0	0	26030	101	1	3	0	0	0	0	0	0	0	0	0	0	0	0	0	19188	64	0	2	0	0	0	0	0	0	0	0	0	0	0	0	0	46469	55	4	3	0	0	0	0	0	0
	G	65	0	0	0	25927	62	92	48	1	5	0	0	0	0	0	0	0	0	0	0	0	19091	37	105	21	0	0	0	0	0	0	0	0	0	0	0	0	0	46212	44	244	28	1	1	0	0	1	0
ES50i	C	66	0	2	2	19678	65	6369	13	4	6	0	0	0	0	0	0	0	0	0	0	0	16229	35	2987	0	0	2	0	1	0	0	0	0	0	0	0	0	0	43953	32	2545	0	0	1	0	0	0	0
	C	67	0	0	0	24643	1469	23	0	0	0	0	0	0	0	0	0	0	0	0	0	0	18366	873	14	0	1	0	0	0	0	0	0	0	0	0	0	0	0	45668	855	8	0	0	0	0	0	0	0
	G	68	0	0	0	24662	1430	30	13	0	0	0	0	0	0	0	0	0	0	0	0	0	18364	870	9	9	2	0	0	0	0	0	0	0	0	0	0	0	0	45652	849	12	18	0	0	0	0	0	0
	G	69	0	0	0	25071	166	838	20	16	22	0	2	0	0	0	0	0	0	0	0	0	18343	88	806	8	5	3	0	1	0	0	0	0	0	0	0	0	0	44699	147	1653	12	4	16	0	0	0	0
ES49i	A	70	0	1	1	17864	8078	165	14	6	3	3	2	0	0	0	0	0	0	0	0	0	15181	4028	29	9	1	6	0	0	0	0	0	0	0	0	0	0	0	42831	3636	46	6	7	2	1	2	0	0
	A	71	0	0	0	25174	103	78	57	696	22	3	0	2	0	0	0	0	0	0	0	0	18353	30	65	37	764	3	2	0	0	0	0	0	0	0	0	0	0	44652	73	104	47	1647	8	0	0	0	0
	C	72	0	0	0	25859	264	10	1	0	0	0	1	0	0	0	0	0	0	0	0	0	19119	129	5	1	0	0	0	0	0	0	0	0	0	0	0	0	0	46332	186	10	3	0	0	0	0	0	0
	C	73	0	0	0	26021	105	8	1	0	0	0	0	0	0	0	0	0	0	0	0	0	19228	24	2	0	0	0	0	0	0	0	0	0	0	0	0	0	0	46490	38	2	1	0	0	0	0	0	0
	G	74	0	0	0	26016	22	92	4	1	0	0	0	0	0	0	0	0	0	0	0	0	19132	21	99	2	0	0	0	0	0	0	0	0	0	0	0	0	0	46360	26	140	2	3	0	0	0	0	0
	A	75	0	0	0	25655	147	112	47	23	149	2	0	0	0	0	0	0	0	0	0	0	19026	66	19	14	7	119	2	1	0	0	0	0	0	0	0	0	0	46155	141	47	15	12	161	0	0	0	0
	C	76	0	0	0	25777	206	42	95	13	1	0	1	0	0	0	0	0	0	0	0	0	19149	61	23	18	2	1	0	0	0	0	0	0	0	0	0	0	0	46347	126	36	19	1	1	0	0	0	0
	G	77	0	0	0	26078	50	2	5	0	0	0	0	0	0	0	0	0	0	0	0	0	19231	17	4	1	0	0	1	0	0	0	0	0	0	0	0	0	0	46511	18	2	0	0	0	0	0	0	0
ES48i	G	78	0	1	1	17747	8072	114	177	10	11	2	2	0	0	0	0	0	0	0	0	0	15231	3913	46	63	0	1	0	0	0	0	0	0	0	0	0	0	0	42915	3477	40	90	6	3	0	0	0	0
ES47i	A	79	0	1	1	17612	7850	331	305	7	24	1	0	0	0	0	1	4	0	0	0	0	15069	3873	178	123	6	3	0	1	0	0	0	0	1	0	0	0	0	42764	3379	267	106	5	6	1	1	0	0
ES46i	G	80	0	2	2	17524	885	7627	57	8	5	2	23	0	2	1	1	0	0	0	0	0	14335	1130	3777	5	0	2	0	3	2	0	0	0	0	0	0	0	0	40720	2537	3250	13	2	6	0	3	0	0
ES45i	A	81	0	1	1	17898	7982	159	63	16	12	5	0	0	0	0	0	0	0	0	0	0	15273	3929	37	9	3	1	1	0	1	0	0	0	0	0	0	0	0	42998	3479	42	8	2	2	0	0	0	0
ES44i	G	82	0	1	1	15655	9800	370	182	26	29	72	1	0	0	0	0	0	0	0	0	0	12981	6100	105	38	1	7	22	0	0	0	0	0	0	0	0	0	0	37546	8749	162	43	5	1	25	0	0	0
	C	83	0	0	0	25591	379	73	89	1	0	1	1	0	0	0	0	0	0	0	0	0	19110	112	14	17	0	0	1	0	0	0	0	0	0	0	0	0	0	46314	161	33	21	0	1	1	0	0	0
ES43d	C	84	2	0	-2	11139	399	14572	21	4	0	0	0	0	0	0	0	0	0	0	0	0	7083	136	12031	2	2	0	0	0	0	0	0	0	0	0	0	0	0	12515	408	33599	9	0	0	0	0	0	0
ES42d	G	85	4	0	-4	11830	279	51	65	13904	5	1	0	0	0	0	0	0	0	0	0	0	8120	80	30	83	10935	4	0	1	1	0	0	0	0	0	0	0	0	16668	121	79	194	29450	16	3	0	0	0
ES41i	A	86	0	1	1	15914	9256	740	92	118	10	4	1	0	0	0	0	0	0	0	0	0	13276	5725	172	31	39	10	0	0	1	0	0	0	0	0	0	0	0	38530	7640	258	49	39	12	3	0	0	0
ES40i	A	87	0	4	4	15540	521	684	383	8956	49	1	0	1	0	0	0	0	0	0	0	0	12807	185	283	496	5472	11	0	0	0	0	0	0	0	0	0	0	0	37160	326	440	1388	7208	7	2	0	0	0
ES39i	A	88	1	3	2	1462	14883	331	9321	116	12	5	1	3	0	0	0	1	0	0	0	0	2082	11117	128	5865	49	10	3	0	0	0	0	0	0	0	0	0	0	8038	29762	249	8382	86	11	2	1	0	0
ES38i	A	89	0	1	1	14382	9878	1035	613	98	83	9	36	1	0	0	0	0	0	0	0	0	12465	6089	433	207	30	10	1	17	2	0	0	0	0	0	0	0	0	36532	8773	807	309	42	23	11	31	3	0
ES37i	A	90	0	1	1	14945	9646	751	300	122	132	54	73	108	4	0	0	0	0	0	0	0	12464	6108	351	113	26	48	25	21	95	3	0	0	0	0	0	0	0	36559	8784	614	145	45	85	41	27	227	4
	A	91	0	0	0	23318	728	1237	492	165	57	122	12	3	1	0	0	0	0	0	0	0	18071	344	541	130	52	9	102	3	2	0	0	0	0	0	0	0	0	44478	503	1033	203	94	28	182	4	4	2
ES36i	G	92	0	4	4	14400	1576	408	1011	8623	59	38	5	5	6	4	0	0	0	0	0	0	12606	475	334	341	5466	17	9	0	1	3	2	0	0	0	0	0	0	36699	885	752	591	7557	19	16	3	3	2
ES35i	G	93	0	3	3	15362	1212	532	8740	208	68	4	4	1	2	1	0	0	0	0	1	0	13014	427	300	5410	88	12	3	0	0	0	0	0	0	0	0	0	0	37713	709	616	7262	158	59	9	2	3	0
	G	94	0	0	0	23738	1497	200	324	307	40	14	13	1	1	0	0	0	0	0	0	0	17956	877	72	227	99	6	10	7	0	0	0	0	0	0	0	0	0	44262	1609	120	356	143	22	6	13	0	0
	A	95	0	0	0	23405	1333	829	202	66	45	35	46	20	140	14	0	0	0	0	0	0	17929	607	409	65	22	22	24	60	24	87	4	1	0	0	0	0	0	44055	1174	791	98	38	40	44	109	30	138
ES34i	G	96	0	1	1	15427	9338	822	444	41	29	22	7	1	2	0	0	1	1	0	0	0	12397	6079	652	89	12	18	5	0	0	1	0	1	0	0	0	0	0	34774	9967	1604	118	12	41	13	1	0	1
ES33i	G	97	0	2	2	12762	677	10389	1494	509	98	142	58	5	1	0	0	0	0	0	0	0	9357	797	8331	402	234	48	42	36	5	1	0	0	1	0	0	0	0	25887	2351	17107	639	392	50	48	51	3	3
	C	98	0	0	0	22645	2365	182	875	57	3	2	6	0	0	0	0	0	0	0	0	0	16059	2495	94	581	13	6	1	5	0	0	0	0	0	0	0	0	0	37864	6876	257	1443	66	8	3	14	0	0
	G	99	0	0	0	23665	840	41	1565	18	3	3	0	0	0	0	0	0	0	0	0	0	17118	595	15	1523	2	1	0	0	0	0	0	0	0	0	0	0	0	40559	1474	52	4422	21	1	2	0	0	0
ES32i	G	100	0	2	2	12050	3350	10050	160	346	31	15	12	104	14	3	0	0	0	0	0	0	8660	2885	6835	76	597	19	18	13	140	11	0	0	0	0	0	0	0	23618	7725	12823	168	1583	66	42	21	439	35
ES31i	G	101	0	8	8	11967	2789	1147	124	356	68	114	229	9175	163	3	0	0	0	0	0	0	8628	2407	1239	93	380	85	87	151	6109	72	3	0	0	0	0	0	0	23591	6617	3222	228	968	200	238	322	10939	193
ES30i	G	102	0	2	2	12154	227	12598	458	664	21	10	2	1	0	0	0	0	0	0	0	0	8702	297	8907	308	977	40	15	4	2	1	1	0	0	0	0	0	0	24238	942	18065	615	2514	99	41	8	6	2
ES29i	A	103	0	4	4	14004	1108	398	384	10175	29	29	3	0	4	1	0	0	0	0	0	0	10509	1363	408	267	6680	9	17	1	0	0	0	0	0	0	0	0	0	29608	3390	1202	767	11511	13	37	1	1	1
ES28i	G	104	0	2	2	12768	2626	10378	307	19	12	1	21	3	0	0	0	0	0	0	0	0	10264	1986	6858	123	8	9	1	4	0	0	1	0	0	0	0	0	0	29365	5241	11711	180	12	8	3	7	4	0
	G	105	0	0	0	22841	803	179	2228	22	57	0	4	1	0	0	0	0	0	0	0	0	17077	382	200	1559	19	13	0	4	0	0	0	0	0	0	0	0	0	41426	731	423	3927	12	12	0	0	0	0
ES27i	A	106	0	3	3	13353	538	487	11424	35	286	5	1	6	0	0	0	0	0	0	0	0	10437	226	454	8033	16	84	2	0	2	0	0	0	0	0	0	0	0	30575	535	1154	14126	17	119	5	0	0	0
	G	107	0	0	0	22422	2600	917	102	40	27	7	1	0	19	0	0	0	0	0	0	0	16521	1645	1010	37	17	11	1	0	1	11	0	0	0	0	0	0	0	38895	4130	3378	66	30	20	1	0	3	7
ES26i	A	108	0	2	2	12486	1371	12120	96	45	5	2	8	1	1	0	0	0	0	0	0	0	8142	1499	9542	55	9	1	1	5	0	0	0	0	0	0	0	0	0	21254	4805	20369	81	14	5	1	1	1	0
ES25i	G	109	0	1	1	10153	14647	851	378	62	10	9	2	23	0	0	0	0	0	0	0	0	6938	11382	798	107	23	2	1	0	3	0	0	0	0	0	0	0	0	18355	25368	2597	170	34	0	0	3	4	0
ES24d	C	110	3	1	-2	1690	15241	209	8944	26	24	0	0	1	0	0	0	0	0	0	0	0	1669	11709	69	5799	4	0	0	1	1	0	0	0	2	0	0	0	0	4848	26082	155	15433	8	5	0	0	0	0
	A	111	0	0	0	25953	108	49	24	1	0	0	0	0	0	0	0	0	0	0	0	0	19174	44	30	5	0	1	0	0	0	0	0	0	0	0	0	0	0	46373	69	81	7	0	0	1	0	0	0
ES23i	A	112	0	2	2	10035	1599	14286	112	66	20	11	4	2	0	0	0	0	0	0	0	0	7491	1235	10455	36	25	7	2	3	0	0	0	0	0	0	0	0	0	20771	3574	22056	52	44	26	4	4	0	0
Es22i	A	113	0	3	3	10049	1157	456	14019	324	89	23	14	1	0	0	0	3	0	0	0	0	6819	702	336	11224	140	30	2	0	1	0	0	0	0	0	0	0	0	18085	2107	890	25138	229	73	8	1	0	0
Es21i	A	114	0	2	2	8961	848	14921	832	133	69	196	11	142	5	4	3	9	1	0	0	0	6226	363	11892	665	27	28	32	6	11	2	0	1	0	1	0	0	0	16770	781	26594	2212	48	28	56	3	33	1
ES20i	A	115	0	1	1	8703	14728	1241	735	448	132	64	73	7	0	0	3	1	0	0	0	0	7296	10616	841	283	149	31	29	4	5	0	0	0	0	0	0	0	0	20219	22449	2595	772	346	76	49	17	5	0
	G	116	0	0	0	22067	1434	1123	416	423	287	65	126	141	12	6	9	22	3	1	0	0	16955	1146	543	213	184	71	18	55	51	2	1	3	9	3	0	0	0	40702	3196	1241	372	562	135	69	118	96	4
	A	117	0	0	0	22818	1290	407	586	321	188	130	61	30	35	26	68	145	28	2	0	0	17596	896	251	179	96	63	33	10	12	13	10	21	65	6	3	0	0	42591	2176	566	373	208	121	76	44	26	35
ES19d	G	118	3	0	-3	15544	1870	427	7752	94	234	170	7	13	10	0	6	7	0	1	0	0	12795	1063	217	4943	21	109	77	3	3	0	3	8	11	1	0	0	0	30084	2245	511	13279	70	146	155	11	1	2
	G	119	0	0	0	22399	1984	436	820	269	205	4	9	8	1	0	0	0	0	0	0	0	17606	830	343	354	68	46	1	6	0	0	0	0	0	0	0	0	0	43018	1738	875	607	184	96	2	5	2	2
	G	120	0	0	0	22496	1461	693	1065	92	296	12	14	4	2	0	0	0	0	0	0	0	17380	1201	230	286	45	99	5	8	0	0	0	0	0	0	0	0	0	41979	3055	468	759	68	164	12	23	0	2
	G	121	1	1	0	1470	21489	1386	543	304	881	38	16	3	3	1	0	0	0	1	0	0	1046	16364	1194	259	125	217	24	20	2	3	0	0	0	0	0	0	0	3133	39136	2742	723	240	483	44	25	3	2
	G	122	0	0	0	21749	2789	818	361	124	265	17	9	1	2	0	0	0	0	0	0	0	16750	1584	713	97	29	60	12	6	2	1	0	0	0	0	0	0	0	40258	3827	2022	203	58	111	22	29	1	0
ES18i	G	123	0	1	1	7952	17250	306	239	44	63	79	199	2	1	0	0	0	0	0	0	0	5175	13572	255	158	13	11	16	54	0	0	0	0	0	0	0	0	0	13379	31881	681	347	41	51	29	120	1	0
	G	124	0	0	0	21943	3478	131	95	331	24	13	116	3	1	0	0	0	0	0	0	0	16904	1887	62	65	180	11	15	126	4	0	0	0	0	0	0	0	0	41162	4354	159	183	329	21	21	299	2	1
ES17i	G	125	0	4	4	8136	377	3004	267	14107	106	135	0	3	0	0	0	0	0	0	0	0	4513	274	1919	461	12011	41	35	0	0	0	0	0	0	0	0	0	0	11205	716	4250	1570	28555	121	111	3	0	0
ES16i	G	126	0	2	2	6613	662	18812	33	3	7	1	3	0	1	0	0	0	0	0	0	0	4020	547	14677	8	1	0	1	0	0	0	0	0	0	0	0	0	0	9784	1345	35373	19	8	1	0	1	0	0
	A	127	0	0	0	21141	1789	2008	1065	13	110	5	3	0	1	0	0	0	0	0	0	0	16248	1216	800	858	2	128	1	0	0	1	0	0	0	0	0	0	0	39498	2425	2103	2198	13	284	7	2	0	1
ES15i	A	128	0	3	3	6210	2879	139	16878	7	12	9	1	0	0	0	0	0	0	0	0	0	3839	1973	80	13347	4	7	3	0	0	1	0	0	0	0	0	0	0	9460	4274	205	32547	6	28	10	0	0	0
	C	129	0	0	0	24377	1474	143	127	12	0	1	0	0	0	1	0	0	0	0	0	0	18179	858	103	111	3	0	0	0	0	0	0	0	0	0	0	0	0	44078	1931	215	294	9	3	0	0	0	0
	C	130	0	0	0	25640	329	118	6	41	1	0	0	0	0	0	0	0	0	0	0	0	18793	236	152	1	70	2	0	0	0	0	0	0	0	0	0	0	0	45411	543	426	3	147	1	0	0	0	0
	C	131	0	0	0	25892	132	108	2	1	0	0	0	0	0	0	0	0	0	0	0	0	19140	60	51	2	1	0	0	0	0	0	0	0	0	0	0	0	0	46231	193	103	4	0	0	0	0	0	0
ES14d	G	132	3	0	-3	19648	1576	110	4778	10	5	3	1	3	0	1	0	0	0	0	0	0	16382	867	56	1937	4	2	2	2	1	1	0	0	0	0	0	0	0	39708	2066	110	4630	4	5	3	0	2	1
ES13d	G	133	4	0	-4	18245	821	1159	296	5602	6	2	1	3	0	0	0	0	0	0	0	0	14661	1166	753	180	2494	0	0	0	0	0	0	0	0	0	0	0	0	35068	3630	1427	447	5952	4	1	1	0	0
ES12i	G	134	0	1	1	6782	14728	198	4417	5	4	0	1	0	0	0	0	0	0	0	0	0	5218	11148	143	2736	3	6	0	0	0	0	0	0	0	0	0	0	0	13256	25971	305	6987	5	6	0	1	0	0
ES11d	A	135	2	1	-1	542	18129	2575	140	4725	8	15	1	0	0	0	0	0	0	0	0	0	645	14509	1121	79	2893	4	3	0	0	0	0	0	0	0	0	0	0	2236	34280	2442	220	7336	2	15	0	0	0
	A	136	0	0	0	17351	8644	33	73	4	1	4	1	1	2	20	1	0	0	0	0	0	12592	6624	8	20	4	1	2	0	0	1	2	0	0	0	0	0	0	29789	16664	20	46	6	0	0	1	1	1
	A	137	0	0	0	20973	288	4824	37	7	2	2	2	0	0	0	0	0	0	0	0	0	16199	198	2829	15	7	0	0	6	0	0	0	0	0	0	0	0	0	38940	456	7091	14	19	1	3	7	0	0
	G	138	0	0	0	21054	145	4878	9	45	3	1	0	0	0	0	0	0	0	0	0	0	16402	102	2741	7	2	0	0	0	0	0	0	0	0	0	0	0	0	39371	274	6861	9	15	1	0	0	0	0
ES10i	A	139	0	1	1	6309	19766	41	12	5	2	0	0	0	0	0	0	0	0	0	0	0	5453	13762	18	15	6	0	0	0	0	0	0	0	0	0	0	0	0	14264	32217	32	17	1	0	0	0	0	0
ES9i	A	140	0	2	2	2266	4314	19529	18	4	2	0	0	0	0	0	1	1	0	0	0	0	1596	4086	13555	13	2	1	0	0	0	0	0	1	0	0	0	0	0	4397	10373	31732	25	1	2	0	0	0	0
ES8i	A	141	0	1	1	7147	14615	3798	483	89	2	1	0	0	0	0	0	0	0	0	0	0	4475	10808	3798	135	38	0	0	0	0	0	0	0	0	0	0	0	0	11398	24973	9716	310	133	0	1	0	0	0
	C	142	0	0	0	16525	717	8841	16	32	1	3	0	0	0	0	0	0	0	0	0	0	11489	389	7357	12	6	1	0	0	0	0	0	0	0	0	0	0	0	26432	1067	18992	25	15	0	0	0	0	0
	A	143	0	0	0	26102	26	7	0	0	0	0	0	0	0	0	0	0	0	0	0	0	19243	10	1	0	0	0	0	0	0	0	0	0	0	0	0	0	0	46493	36	2	0	0	0	0	0	0	0
ES7d	C	144	1	0	-1	24817	1287	21	3	5	2	0	0	0	0	0	0	0	0	0	0	0	18734	517	2	1	0	0	0	0	0	0	0	0	0	0	0	0	0	45550	969	10	2	0	0	0	0	0	0
	G	145	0	0	0	26062	69	3	0	1	0	0	0	0	0	0	0	0	0	0	0	0	19228	20	6	0	0	0	0	0	0	0	0	0	0	0	0	0	0	46488	35	6	0	2	0	0	0	0	0
ES6d	A	146	3	1	-2	4960	19087	1187	872	27	0	2	0	0	0	0	0	0	0	0	0	0	2841	15790	254	365	4	0	0	0	0	0	0	0	0	0	0	0	0	7050	38327	512	628	14	0	0	0	0	0
ES5i	G	147	0	2	2	1809	104	24218	2	0	0	0	0	2	0	0	0	0	0	0	0	0	597	106	18538	3	2	1	0	0	7	0	0	0	0	0	0	0	0	1119	320	45063	6	3	1	0	0	19	0
ES4i	A	148	0	1	1	1722	24396	11	3	3	0	0	0	0	0	0	0	0	0	0	0	0	543	18706	4	0	1	0	0	0	0	0	0	0	0	0	0	0	0	1008	45505	16	1	1	0	0	0	0	0
	A	149	0	0	0	26117	7	6	2	0	1	1	1	0	0	0	0	0	0	0	0	0	19247	1	2	2	0	1	1	0	0	0	0	0	0	0	0	0	0	46515	10	6	0	0	0	0	0	0	0
	G	150	0	0	0	26118	7	5	2	1	2	0	0	0	0	0	0	0	0	0	0	0	19242	2	8	0	2	0	0	0	0	0	0	0	0	0	0	0	0	46508	2	20	0	1	0	0	0	0	0
ES3i	A	151	0	2	2	579	22	25532	2	0	0	0	0	0	0	0	0	0	0	0	0	0	295	13	18944	2	0	0	0	0	0	0	0	0	0	0	0	0	0	475	25	46029	1	0	1	0	0	0	0
	G	152	0	0	0
	A	153	0	0	0
ES2d	A	154	4	3	-1
	G	155	0	0	0
	A	156	0	0	0
ES1i	A	157	0	1	1
	A	158	1	1	0
	A	159	0	0	0
	G	160	0	0	0
	A	161	0	0	0
	A	162	1	1	0
3' end	G	163	1	1	0
Total
[truncated: 7 more columns]

## Sheet: RPS12_F1RNAi RESC6-IP 0-4Day R2
RPS12_KH2F1-RNAi_RESC6-IP_0-4 Day_R2
						J16 - F1 RNAi 0Day RESC6 IP - Bio Rep																	J17 - F1 RNAi 3Day RESC6 IP - Bio Rep																	J18 - F1 RNAi 4Day RESC6 IP - Bio Rep
			no of Ts present before that position			# reads with indicated # Ts present before that position																	# reads with indicated # Ts present before that position																	# reads with indicated # Ts present before that position
	sequence	T-stripped	pre-edited	edited	editing events; del = -; ins = +	0	1	2	3	4	5	6	7	8	9	10	11	12	13	14	15	16	0	1	2	3	4	5	6	7	8	9	10	11	12	13	14	15	16	0	1	2	3	4	5	6	7	8	9
	C	1
5' end	A	2
	A	3
	A	4
	C	5
	A	6
	C	7
	G	8
	A	9
	A	10
	A	11						0.05
	C	12						0.1
	A	13						0.2
	A	14						0.3
	A	15
	C	16	0	0	0	22426	0	0	0	0	0	0	0	0	0	0	0	0	0	0	0	0	43328	0	0	0	0	0	0	0	0	0	0	0	0	0	0	0	0	38750	0	0	0	0	0	0	0	0	0
	A	17	1	1	0	112	22314	0	0	0	0	0	0	0	0	0	0	0	0	0	0	0	221	43107	0	0	0	0	0	0	0	0	0	0	0	0	0	0	0	128	38621	1	0	0	0	0	0	0	0
	A	18	0	0	0	22412	7	5	2	0	0	0	0	0	0	0	0	0	0	0	0	0	43315	7	3	3	0	0	0	0	0	0	0	0	0	0	0	0	0	38745	2	1	1	1	0	0	0	0	0
	A	19	0	0	0	22382	29	13	2	0	0	0	0	0	0	0	0	0	0	0	0	0	43259	39	28	0	2	0	0	0	0	0	0	0	0	0	0	0	0	38732	9	8	1	0	0	0	0	0	0
	G	20	0	0	0	22364	33	27	0	2	0	0	0	0	0	0	0	0	0	0	0	0	43285	22	21	0	0	0	0	0	0	0	0	0	0	0	0	0	0	38727	14	8	0	0	1	0	0	0	0
	A	21	1	1	0	3399	18898	103	13	7	0	2	0	0	4	0	0	0	0	0	0	0	3727	39522	69	7	1	1	1	0	0	0	0	0	0	0	0	0	0	1673	37038	38	1	0	0	0	0	0	0
	A	22	0	0	0	19322	875	2186	33	6	1	3	0	0	0	0	0	0	0	0	0	0	40694	833	1769	24	2	0	5	1	0	0	0	0	0	0	0	0	0	37584	421	734	9	2	0	0	0	0	0
ES76i	A	23	0	1	1	20412	1648	290	62	10	1	3	0	0	0	0	0	0	0	0	0	0	41036	2023	225	39	5	0	0	0	0	0	0	0	0	0	0	0	0	37727	896	102	21	3	0	1	0	0	0
	A	24	0	0	0	21141	909	71	244	15	3	26	1	16	0	0	0	0	0	0	0	0	42129	878	49	245	9	0	3	0	13	0	2	0	0	0	0	0	0	38225	376	39	98	5	1	2	0	4	0
	A	25	0	0	0	19439	671	97	172	1767	248	21	1	2	6	0	2	0	0	0	0	0	40712	674	58	137	1523	213	5	4	0	1	1	0	0	0	0	0	0	37605	321	31	36	672	83	1	0	0	1
ES75i	G	26	0	4	4	18012	199	2090	104	1338	664	13	5	0	0	1	0	0	0	0	0	0	39051	211	1793	76	1469	710	14	2	2	0	0	0	0	0	0	0	0	36815	100	774	40	709	302	9	1	0	0
ES74i	G	27	0	8	8	17748	128	66	50	28	1922	79	98	2073	36	19	39	98	39	2	1	0	38747	349	51	77	24	1513	80	104	2131	42	14	31	95	53	12	5	0	36700	141	30	36	12	641	52	47	999	18
	C	28	0	0	0	22243	108	44	13	8	6	4	0	0	0	0	0	0	0	0	0	0	43006	271	26	11	12	0	1	0	0	0	0	1	0	0	0	0	0	38590	142	7	3	6	1	1	0	0	0
	G	29	0	0	0	22388	22	10	5	0	0	1	0	0	0	0	0	0	0	0	0	0	43289	20	10	8	1	0	0	0	0	0	0	0	0	0	0	0	0	38735	8	5	2	0	0	0	0	0	0
ES73i	A	30	0	1	1	17812	4492	37	39	26	9	10	1	0	0	0	0	0	0	0	0	0	39074	4157	43	26	10	3	15	0	0	0	0	0	0	0	0	0	0	36831	1868	14	16	8	3	7	3	0	0
ES72i	G	31	0	1	1	17758	4531	79	35	6	1	2	0	1	0	3	8	1	1	0	0	0	38896	4318	64	32	10	6	0	0	0	0	1	0	0	1	0	0	0	36740	1958	29	12	5	1	0	0	1	0
ES71i	G	32	0	1	1	17848	4429	71	53	13	5	7	0	0	0	0	0	0	0	0	0	0	39037	4047	44	181	8	6	5	0	0	0	0	0	0	0	0	0	0	36824	1809	25	85	1	3	3	0	0	0
	A	33	0	0	0	22062	213	73	56	3	12	7	0	0	0	0	0	0	0	0	0	0	42566	492	221	35	6	4	4	0	0	0	0	0	0	0	0	0	0	38357	267	100	24	1	0	1	0	0	0
ES70d	G	34	6	5	-1	69	204	244	104	66	4221	17502	15	1	0	0	0	0	0	0	0	0	85	369	486	145	114	3906	38179	40	4	0	0	0	0	0	0	0	0	58	206	277	81	64	1768	36263	31	2	0
ES69i	A	35	0	1	1	17698	4630	21	33	13	11	15	0	4	1	0	0	0	0	0	0	0	38770	4487	19	26	4	11	6	1	4	0	0	0	0	0	0	0	0	36658	2057	7	12	5	3	5	0	3	0
ES68i	G	36	0	1	1	17686	4623	46	36	17	10	6	0	2	0	0	0	0	0	0	0	0	38785	4453	39	35	5	5	2	4	0	0	0	0	0	0	0	0	0	36689	2019	13	23	1	3	2	0	0	0
ES67d	G	37	1	0	-1	4646	17639	34	71	10	7	16	1	0	0	2	0	0	0	0	0	0	4688	38478	27	110	9	4	10	0	1	0	1	0	0	0	0	0	0	2154	36501	12	69	4	4	6	0	0	0
ES66i	G	38	0	2	2	17698	64	4607	16	9	1	4	4	22	1	0	0	0	0	0	0	0	38692	92	4450	13	8	6	1	3	59	3	0	1	0	0	0	0	0	36597	72	2026	7	6	0	1	1	34	6
ES65i	G	39	0	2	2	17655	126	4588	28	7	22	0	0	0	0	0	0	0	0	0	0	0	38535	329	4412	24	6	22	0	0	0	0	0	0	0	0	0	0	0	36546	166	2014	13	3	8	0	0	0	0
ES64i	A	40	0	3	3	17671	81	94	4536	10	2	32	0	0	0	0	0	0	0	0	0	0	38759	160	81	4293	9	4	17	5	0	0	0	0	0	0	0	0	0	36671	108	51	1903	6	0	10	1	0	0
	C	41	0	0	0	22213	129	57	22	3	2	0	0	0	0	0	0	0	0	0	0	0	43059	155	87	25	2	0	0	0	0	0	0	0	0	0	0	0	0	38609	87	42	10	2	0	0	0	0	0
ES63d	G	42	1	0	-1	4907	17510	8	0	0	0	1	0	0	0	0	0	0	0	0	0	0	5735	37585	6	2	0	0	0	0	0	0	0	0	0	0	0	0	0	2887	35862	1	0	0	0	0	0	0	0
ES62i	G	43	0	4	4	17628	100	87	81	4512	17	0	1	0	0	0	0	0	0	0	0	0	39169	194	90	83	3784	6	1	0	1	0	0	0	0	0	0	0	0	36964	92	59	42	1587	6	0	0	0	0
ES61i	A	44	0	4	4	17649	92	99	72	4510	4	0	0	0	0	0	0	0	0	0	0	0	38871	277	263	148	3766	2	1	0	0	0	0	0	0	0	0	0	0	36738	174	137	130	1569	2	0	0	0	0
ES60i	G	45	0	3	3	17457	59	56	4759	73	21	1	0	0	0	0	0	0	0	0	0	0	37715	199	75	5211	110	17	1	0	0	0	0	0	0	0	0	0	0	36003	131	57	2497	55	7	0	0	0	0
ES59i	A	46	0	4	4	17449	9	32	365	4561	6	4	0	0	0	0	0	0	0	0	0	0	37707	27	35	1452	4099	6	2	0	0	0	0	0	0	0	0	0	0	36029	21	31	903	1761	5	0	0	0	0
ES58i	G	47	0	1	1	17418	4579	17	27	385	0	0	0	0	0	0	0	0	0	0	0	0	37746	4123	40	49	1369	0	1	0	0	0	0	0	0	0	0	0	0	36066	1779	32	40	830	3	0	0	0	0
ES57i	A	48	0	2	2	17423	84	4582	6	331	0	0	0	0	0	0	0	0	0	0	0	0	37854	233	4076	49	1111	2	0	0	0	2	1	0	0	0	0	0	0	36175	121	1733	27	690	1	0	0	0	3
ES56i	A	49	0	2	2	17406	21	4990	4	3	0	0	2	0	0	0	0	0	0	0	0	0	37955	45	5318	6	4	0	0	0	0	0	0	0	0	0	0	0	0	36236	25	2483	4	0	0	2	0	0	0
ES55i	A	50	0	1	1	17426	4926	68	4	2	0	0	0	0	0	0	0	0	0	0	0	0	37987	5129	203	7	2	0	0	0	0	0	0	0	0	0	0	0	0	36263	2381	98	6	2	0	0	0	0	0
ES54i	G	51	0	1	1	17441	4816	155	3	10	1	0	0	0	0	0	0	0	0	0	0	0	37815	5278	211	7	15	0	0	2	0	0	0	0	0	0	0	0	0	36042	2604	92	3	8	0	1	0	0	0
	A	52	0	0	0	22287	31	90	3	1	14	0	0	0	0	0	0	0	0	0	0	0	42997	99	204	5	1	22	0	0	0	0	0	0	0	0	0	0	0	38596	56	86	1	0	9	2	0	0	0
	G	53	0	0	0	22376	23	23	0	0	3	1	0	0	0	0	0	0	0	0	0	0	43286	10	27	1	0	2	2	0	0	0	0	0	0	0	0	0	0	38729	6	14	0	1	0	0	0	0	0
ES53i	C	54	0	1	1	18597	3823	6	0	0	0	0	0	0	0	0	0	0	0	0	0	0	40550	2769	8	0	1	0	0	0	0	0	0	0	0	0	0	0	0	37565	1182	2	1	0	0	0	0	0	0
	C	55	0	0	0	22418	4	4	0	0	0	0	0	0	0	0	0	0	0	0	0	0	43290	16	22	0	0	0	0	0	0	0	0	0	0	0	0	0	0	38729	11	10	0	0	0	0	0	0	0
	G	56	0	0	0	21417	1009	0	0	0	0	0	0	0	0	0	0	0	0	0	0	0	41252	2072	3	1	0	0	0	0	0	0	0	0	0	0	0	0	0	37746	1002	2	0	0	0	0	0	0	0
ES52d	C	57	2	0	-2	5080	58	17286	2	0	0	0	0	0	0	0	0	0	0	0	0	0	6028	101	37192	4	1	1	1	0	0	0	0	0	0	0	0	0	0	3091	44	35610	3	1	0	1	0	0	0
	G	58	0	0	0	22409	16	0	0	1	0	0	0	0	0	0	0	0	0	0	0	0	43315	10	3	0	0	0	0	0	0	0	0	0	0	0	0	0	0	38747	3	0	0	0	0	0	0	0	0
	A	59	0	0	0	22361	29	14	19	1	0	2	0	0	0	0	0	0	0	0	0	0	43232	61	17	12	1	1	3	0	1	0	0	0	0	0	0	0	0	38724	18	5	2	0	0	1	0	0	0
ES51i	G	60	0	2	2	17320	189	4876	39	0	0	0	2	0	0	0	0	0	0	0	0	0	37296	510	5502	17	2	1	0	0	0	0	0	0	0	0	0	0	0	35655	317	2772	5	0	0	1	0	0	0
	C	61	0	0	0	22372	42	3	9	0	0	0	0	0	0	0	0	0	0	0	0	0	43240	77	5	4	0	0	2	0	0	0	0	0	0	0	0	0	0	38716	31	1	1	0	0	1	0	0	0
	C	62	0	0	0	22425	1	0	0	0	0	0	0	0	0	0	0	0	0	0	0	0	43320	7	1	0	0	0	0	0	0	0	0	0	0	0	0	0	0	38748	2	0	0	0	0	0	0	0	0
	C	63	0	0	0	22385	41	0	0	0	0	0	0	0	0	0	0	0	0	0	0	0	43247	79	1	0	0	0	1	0	0	0	0	0	0	0	0	0	0	38717	33	0	0	0	0	0	0	0	0
	A	64	0	0	0	22340	83	3	0	0	0	0	0	0	0	0	0	0	0	0	0	0	43227	96	1	4	0	0	0	0	0	0	0	0	0	0	0	0	0	38707	39	3	1	0	0	0	0	0	0
	G	65	0	0	0	22239	54	79	53	0	0	1	0	0	0	0	0	0	0	0	0	0	42920	73	264	65	1	2	0	0	3	0	0	0	0	0	0	0	0	38464	36	222	27	0	0	0	0	1	0
ES50i	C	66	0	2	2	18294	55	4056	9	1	11	0	0	0	0	0	0	0	0	0	0	0	38890	59	4371	4	1	3	0	0	0	0	0	0	0	0	0	0	0	36556	22	2168	4	0	0	0	0	0	0
	C	67	0	0	0	21434	973	19	0	0	0	0	0	0	0	0	0	0	0	0	0	0	41909	1403	15	1	0	0	0	0	0	0	0	0	0	0	0	0	0	38027	716	7	0	0	0	0	0	0	0
	G	68	0	0	0	21475	921	24	5	0	0	0	0	0	1	0	0	0	0	0	0	0	41887	1396	24	21	0	0	0	0	0	0	0	0	0	0	0	0	0	38027	702	11	10	0	0	0	0	0	0
	G	69	0	0	0	21396	154	822	14	14	23	0	3	0	0	0	0	0	0	0	0	0	40986	206	2093	25	7	9	0	1	0	1	0	0	0	0	0	0	0	37131	140	1453	17	2	7	0	0	0	0
ES49i	A	70	0	1	1	16963	5267	169	17	3	3	3	1	0	0	0	0	0	0	0	0	0	37102	6142	68	6	3	5	1	1	0	0	0	0	0	0	0	0	0	35621	3075	39	8	2	4	1	0	0	0
	A	71	0	0	0	21478	117	95	61	656	13	5	1	0	0	0	0	0	0	0	0	0	40906	103	156	95	2058	9	1	0	0	0	0	0	0	0	0	0	0	37118	59	76	60	1427	10	0	0	0	0
	C	72	0	0	0	22219	195	8	4	0	0	0	0	0	0	0	0	0	0	0	0	0	43032	285	8	3	0	0	0	0	0	0	0	0	0	0	0	0	0	38638	104	7	0	1	0	0	0	0	0
	C	73	0	0	0	22323	90	6	6	1	0	0	0	0	0	0	0	0	0	0	0	0	43262	59	6	1	0	0	0	0	0	0	0	0	0	0	0	0	0	38719	30	1	0	0	0	0	0	0	0
	G	74	0	0	0	22341	21	59	4	1	0	0	0	0	0	0	0	0	0	0	0	0	43063	41	222	1	1	0	0	0	0	0	0	0	0	0	0	0	0	38638	23	88	0	1	0	0	0	0	0
	A	75	0	0	0	21993	130	119	53	11	110	7	3	0	0	0	0	0	0	0	0	0	42795	159	61	24	14	273	1	1	0	0	0	0	0	0	0	0	0	38451	124	33	10	19	113	0	0	0	0
	C	76	0	0	0	22073	210	49	81	10	1	0	2	0	0	0	0	0	0	0	0	0	43090	161	37	33	6	1	0	0	0	0	0	0	0	0	0	0	0	38597	105	25	21	1	0	0	1	0	0
	G	77	0	0	0	22374	41	5	3	2	1	0	0	0	0	0	0	0	0	0	0	0	43297	23	4	4	0	0	0	0	0	0	0	0	0	0	0	0	0	38737	10	2	1	0	0	0	0	0	0
ES48i	G	78	0	1	1	16920	5259	84	146	8	7	1	1	0	0	0	0	0	0	0	0	0	37147	5937	92	149	0	2	0	0	0	0	1	0	0	0	0	0	0	35724	2935	40	47	1	2	0	1	0	0
ES47i	A	79	0	1	1	16771	5043	301	283	8	12	4	1	0	1	1	0	1	0	0	0	0	36703	5866	502	242	4	7	2	2	0	0	0	0	0	0	0	0	0	35598	2843	198	107	2	2	0	0	0	0
ES46i	G	80	0	2	2	16719	789	4839	50	8	7	4	5	0	5	0	0	0	0	0	0	0	34595	3109	5593	14	5	3	1	7	0	0	0	0	1	0	0	0	0	33874	2116	2742	13	3	0	0	2	0	0
ES45i	A	81	0	1	1	17085	5123	126	66	10	7	3	1	5	0	0	0	0	0	0	0	0	37297	5951	54	16	0	5	2	0	3	0	0	0	0	0	0	0	0	35756	2936	37	12	7	2	0	0	0	0
ES44i	G	82	0	1	1	14956	6918	272	165	21	19	74	0	1	0	0	0	0	0	0	0	0	31372	11637	219	51	9	10	30	0	0	0	0	0	0	0	0	0	0	31244	7307	124	28	7	5	34	0	0	0
	C	83	0	0	0	21884	370	83	87	1	0	0	1	0	0	0	0	0	0	0	0	0	43057	202	43	20	5	1	0	0	0	0	0	0	0	0	0	0	0	38566	151	19	11	0	2	0	0	0	0
ES43d	C	84	2	0	-2	8151	339	13920	14	2	0	0	0	0	0	0	0	0	0	0	0	0	14079	289	28956	3	1	0	0	0	0	0	0	0	0	0	0	0	0	10567	376	27804	3	0	0	0	0	0	0
ES42d	G	85	4	0	-4	8845	234	68	76	13199	4	0	0	0	0	0	0	0	0	0	0	0	16768	122	84	179	26162	11	1	1	0	0	0	0	0	0	0	0	0	14251	97	74	155	24159	13	0	0	1	0
ES41i	A	86	0	1	1	15130	6414	737	59	75	10	1	0	0	0	0	0	0	0	0	0	0	32091	10736	342	71	70	13	5	0	0	0	0	0	0	0	0	0	0	32042	6419	189	51	42	6	1	0	0	0
ES40i	A	87	0	4	4	14911	444	689	263	6078	38	2	1	0	0	0	0	0	0	0	0	0	30950	421	573	1188	10174	19	0	3	0	0	0	0	0	0	0	0	0	30941	284	360	1108	6044	13	0	0	0	0
ES39i	A	88	1	3	2	1445	14130	259	6450	120	12	3	3	3	1	0	0	0	0	0	0	0	5073	26655	319	11147	108	14	9	1	1	0	0	0	0	1	0	0	0	7040	24412	217	7012	57	10	2	0	0	0
ES38i	A	89	0	1	1	13652	6992	964	632	90	59	4	31	2	0	0	0	0	0	0	0	0	30063	11626	1094	390	49	43	11	44	8	0	0	0	0	0	0	0	0	30472	7338	614	229	39	24	5	27	2	0
ES37i	A	90	0	1	1	14295	6764	737	236	113	109	43	49	79	1	0	0	0	0	0	0	0	30121	11744	730	213	61	91	65	38	260	5	0	0	0	0	0	0	0	30504	7333	487	104	51	53	49	28	140	1
	A	91	0	0	0	19834	613	1219	474	130	50	97	2	7	0	0	0	0	0	0	0	0	40644	731	1232	272	146	32	258	6	3	4	0	0	0	0	0	0	0	37126	403	805	174	73	18	141	3	7	0
ES36i	G	92	0	4	4	13684	1531	431	877	5782	60	38	4	8	6	4	1	0	0	0	0	0	30516	1041	785	790	10130	25	24	3	4	5	5	0	0	0	0	0	0	30742	693	547	416	6306	16	17	4	6	0
ES35i	G	93	0	3	3	14621	1187	430	5919	212	47	8	1	1	0	0	0	0	0	0	0	0	31462	909	671	10005	188	80	5	5	2	0	0	0	0	1	0	0	0	31481	567	457	6072	113	50	6	2	1	1
	G	94	0	0	0	20301	1346	174	309	214	39	20	22	1	0	0	0	0	0	0	0	0	40427	2088	139	439	180	22	14	16	2	1	0	0	0	0	0	0	0	36925	1350	95	251	98	17	6	6	0	0
	A	95	0	0	0	19857	1233	863	205	56	33	25	24	23	91	15	0	1	0	0	0	0	40249	1380	936	138	64	41	48	129	42	264	29	6	2	0	0	0	0	36754	895	672	88	55	32	24	88	14	118
ES34i	G	96	0	1	1	14784	6384	711	459	27	31	15	5	1	8	0	1	0	0	0	0	0	29722	11733	1582	214	26	34	9	1	1	1	2	1	2	0	0	0	0	29154	8184	1264	96	7	31	7	1	4	1
ES33i	G	97	0	2	2	11895	644	7797	1408	386	104	100	87	3	1	1	0	0	0	0	0	0	22425	2015	17211	899	529	86	88	74	1	0	0	0	0	0	0	0	0	21294	1865	14671	503	299	52	35	28	2	0
	C	98	0	0	0	18791	2544	236	796	48	5	1	5	0	0	0	0	0	0	0	0	0	35627	6070	286	1294	32	3	1	14	1	0	0	0	0	0	0	0	0	31050	6205	226	1218	27	3	7	14	0	0
	G	99	0	0	0	19832	745	47	1788	13	1	0	0	0	0	0	0	0	0	0	0	0	38298	1317	54	3638	19	1	0	0	1	0	0	0	0	0	0	0	0	33283	1269	30	4160	6	2	0	0	0	0
ES32i	G	100	0	2	2	11225	3436	7139	122	339	20	17	7	109	9	3	0	0	0	0	0	0	20790	6759	13437	214	1593	60	34	16	390	34	1	0	0	0	0	0	0	19482	6958	10431	133	1267	48	19	15	373	22
ES31i	G	101	0	8	8	11124	2959	1036	121	342	83	137	164	6343	113	4	0	0	0	0	0	0	20749	5647	3131	234	926	196	219	351	11647	219	9	0	0	0	0	0	0	19460	6115	2658	197	754	175	187	277	8783	132
ES30i	G	102	0	2	2	11324	260	9820	412	581	21	3	2	3	0	0	0	0	0	0	0	0	20958	657	18308	738	2526	99	26	7	9	0	0	0	0	0	0	0	0	19952	887	15132	562	2085	93	19	7	10	2
ES29i	A	103	0	4	4	13338	1068	403	391	7184	23	16	2	1	0	0	0	0	0	0	0	0	25256	3425	934	664	12972	22	47	4	1	3	0	0	0	0	0	0	0	24847	2904	1062	613	9262	22	36	4	0	0
ES28i	G	104	0	2	2	11867	2809	7389	296	20	17	4	19	3	0	2	0	0	0	0	0	0	24835	4812	13356	272	16	18	3	12	1	3	0	0	0	0	0	0	0	24418	4681	9438	191	6	10	1	5	0	0
	G	105	0	0	0	18932	827	203	2364	32	64	2	2	0	0	0	0	0	0	0	0	0	38179	888	415	3797	14	29	2	4	0	0	0	0	0	0	0	0	0	34092	719	385	3518	15	20	0	1	0	0
ES27i	A	106	0	3	3	12557	574	510	8489	35	246	1	0	11	0	3	0	0	0	0	0	0	25048	519	1044	16461	29	222	1	1	3	0	0	0	0	0	0	0	0	25436	463	1077	11640	21	112	1	0	0	0
	G	107	0	0	0	18489	2665	1047	110	37	46	7	7	2	15	0	1	0	0	0	0	0	36709	3875	2582	81	27	29	5	3	4	13	0	0	0	0	0	0	0	32223	3628	2769	78	13	28	0	0	3	8
ES26i	A	108	0	2	2	11599	1520	9177	78	36	8	2	4	2	0	0	0	0	0	0	0	0	19413	3633	20133	104	37	1	0	5	2	0	0	0	0	0	0	0	0	17487	4053	17094	88	16	3	5	4	0	0
ES25i	G	109	0	1	1	9190	11868	927	330	65	13	5	4	22	1	0	1	0	0	0	0	0	16468	24539	1980	276	34	3	4	13	11	0	0	0	0	0	0	0	0	14951	21489	2132	143	24	5	0	0	6	0
ES24d	C	110	3	1	-2	1794	12472	238	7876	16	24	5	0	0	1	0	0	0	0	0	0	0	4102	25255	170	13786	7	6	1	1	0	0	0	0	0	0	0	0	0	4177	22152	138	12272	8	3	0	0	0	0
	A	111	0	0	0	22238	117	56	14	0	0	0	1	0	0	0	0	0	0	0	0	0	43166	90	56	16	0	0	0	0	0	0	0	0	0	0	0	0	0	38611	79	51	9	0	0	0	0	0	0
ES23i	A	112	0	2	2	9108	1552	11554	93	56	42	16	5	0	0	0	0	0	0	0	0	0	17958	3027	22167	94	49	22	7	4	0	0	0	0	0	0	0	0	0	16880	3147	18615	52	31	17	1	7	0	0
Es22i	A	113	0	3	3	8966	1168	475	11390	291	112	16	7	0	1	0	0	0	0	0	0	0	16305	1755	757	24147	272	80	7	2	0	1	0	1	1	0	0	0	0	14843	1840	704	21112	187	58	3	2	0	0
Es21i	A	114	0	2	2	7910	832	12323	813	128	70	219	14	101	2	0	3	9	2	0	0	0	14899	900	25680	1653	49	36	76	3	26	1	1	1	1	2	0	0	0	13568	741	22315	1973	43	26	48	7	19	0
ES20i	A	115	0	1	1	7680	12236	1116	652	425	169	64	64	11	3	0	2	1	2	1	0	0	17548	22459	2078	696	362	94	64	16	6	3	0	2	0	0	0	0	0	16583	18767	2275	660	322	73	49	10	6	1
	G	116	0	0	0	18397	1469	1141	417	385	247	49	115	146	24	2	8	18	8	0	0	0	37868	2731	1228	426	537	160	72	135	118	10	5	14	21	3	0	0	0	33734	2795	1095	300	385	111	52	124	116	4
	A	117	0	0	0	19107	1376	456	592	246	151	143	55	36	30	28	61	118	26	1	0	0	39401	2011	623	465	183	128	110	30	28	30	22	70	194	28	3	2	0	35280	2065	476	326	145	100	67	36	23	18
ES19d	G	118	3	0	-3	13030	1946	435	6531	97	187	154	15	4	5	1	6	10	5	0	0	0	28052	2524	517	11787	54	215	133	10	5	3	5	7	13	3	0	0	0	25562	2230	470	10177	53	113	101	11	1	1
	G	119	0	0	0	18607	2030	494	816	292	162	8	9	8	0	0	0	0	0	0	0	0	39500	2027	802	743	166	71	8	8	1	2	0	0	0	0	0	0	0	35532	1559	876	554	139	67	8	10	3	2
	G	120	0	0	0	18849	1421	723	1025	94	295	5	11	2	1	0	0	0	0	0	0	0	39007	2736	461	755	82	259	7	19	1	1	0	0	0	0	0	0	0	34620	2880	393	629	60	135	11	19	1	2
	G	121	1	1	0	1489	17673	1516	537	298	870	25	16	0	2	0	0	0	0	0	0	0	2418	36651	2809	551	244	586	42	24	1	1	0	1	0	0	0	0	0	2811	32040	2574	620	210	435	36	23	1	0
	G	122	0	0	0	18175	2748	772	385	95	224	19	7	0	1	0	0	0	0	0	0	0	37448	3692	1748	204	58	125	29	24	0	0	0	0	0	0	0	0	0	32845	3493	2029	183	56	121	9	13	0	1
ES18i	G	123	0	1	1	6968	14493	300	243	48	38	102	224	5	3	1	1	0	0	0	0	0	12263	29928	577	325	33	63	45	89	2	3	0	0	0	0	0	0	0	10361	27155	739	282	38	41	31	101	2	0
	G	124	0	0	0	18279	3401	125	125	318	34	18	118	3	3	1	0	1	0	0	0	0	37727	4488	139	211	436	30	25	268	4	0	0	0	0	0	0	0	0	33661	4161	124	171	326	32	22	246	5	2
ES17i	G	125	0	4	4	6885	373	3159	286	11452	110	154	4	3	0	0	0	0	0	0	0	0	10700	693	4570	1088	26112	82	76	5	2	0	0	0	0	0	0	0	0	8754	781	3899	1354	23759	97	105	0	1	0
ES16i	G	126	0	2	2	5541	667	16176	29	6	1	3	2	1	0	0	0	0	0	0	0	0	9512	1283	32502	23	3	3	0	2	0	0	0	0	0	0	0	0	0	7458	1327	29939	19	2	2	2	1	0	0
	A	127	0	0	0	17410	1899	1828	1170	3	113	2	0	0	0	0	1	0	0	0	0	0	36048	2988	1960	2035	14	270	12	1	0	0	0	0	0	0	0	0	0	32097	2237	1949	2192	12	255	4	3	0	1
ES15i	A	128	0	3	3	5162	3020	145	14065	6	13	15	0	0	0	0	0	0	0	0	0	0	8962	4792	196	29338	5	23	7	2	1	0	2	0	0	0	0	0	0	7287	3970	179	27266	11	27	9	1	0	0
	C	129	0	0	0	20936	1241	134	102	12	0	0	1	0	0	0	0	0	0	0	0	0	40899	1940	211	268	9	0	0	0	1	0	0	0	0	0	0	0	0	36952	1390	162	226	15	1	1	1	0	0
	C	130	0	0	0	21847	369	154	4	52	0	0	0	0	0	0	0	0	0	0	0	0	42253	552	353	7	162	1	0	0	0	0	0	0	0	0	0	0	0	37605	482	510	4	145	1	0	1	0	0
	C	131	0	0	0	22202	124	94	2	2	2	0	0	0	0	0	0	0	0	0	0	0	43032	181	111	1	3	0	0	0	0	0	0	0	0	0	0	0	0	38491	169	85	3	2	0	0	0	0	0
ES14d	G	132	3	0	-3	16733	1568	105	3998	5	10	4	0	3	0	0	0	0	0	0	0	0	36392	2115	129	4680	6	4	0	2	0	0	0	0	0	0	0	0	0	32914	1874	98	3849	7	5	3	0	0	0
ES13d	G	133	4	0	-4	15150	771	1263	272	4953	12	3	1	1	0	0	0	0	0	0	0	0	32310	2787	1747	419	6057	8	0	0	0	0	0	0	0	0	0	0	0	28816	3070	1355	363	5140	6	0	0	0	0
ES12i	G	134	0	1	1	5638	12187	214	4376	9	1	1	0	0	0	0	0	0	0	0	0	0	11796	24605	321	6594	5	7	0	0	0	0	0	0	0	0	0	0	0	10712	21557	297	6167	6	11	0	0	0	0
ES11d	A	135	2	1	-1	460	15094	2029	157	4664	1	19	1	1	0	0	0	0	0	0	0	0	1508	31874	2734	204	6985	6	13	3	0	1	0	0	0	0	0	0	0	1728	28183	1949	219	6650	6	10	5	0	0
	A	136	0	0	0	14249	8072	25	41	9	7	3	0	3	5	11	1	0	0	0	0	0	28077	15181	23	31	6	4	1	4	0	0	1	0	0	0	0	0	0	24494	14190	12	37	12	2	0	0	0	0
	A	137	0	0	0	17317	286	4786	19	5	4	1	8	0	0	0	0	0	0	0	0	0	35944	492	6856	19	10	1	2	4	0	0	0	0	0	0	0	0	0	31783	388	6541	22	11	2	3	0	0	0
	G	138	0	0	0	17421	145	4827	7	26	0	0	0	0	0	0	0	0	0	0	0	0	36425	247	6625	12	18	1	0	0	0	0	0	0	0	0	0	0	0	32180	184	6371	6	8	1	0	0	0	0
ES10i	A	139	0	1	1	5218	17160	27	12	7	1	0	1	0	0	0	0	0	0	0	0	0	12288	30985	36	18	1	0	0	0	0	0	0	0	0	0	0	0	0	11163	27555	17	14	1	0	0	0	0	0
ES9i	A	140	0	2	2	1849	3646	16903	18	4	2	0	1	0	1	0	1	1	0	0	0	0	3936	8853	30511	22	4	1	0	1	0	0	0	0	0	0	0	0	0	3349	8246	27130	23	2	0	0	0	0	0
ES8i	A	141	0	1	1	6733	12063	3208	341	80	1	0	0	0	0	0	0	0	0	0	0	0	10744	23893	8271	334	85	1	0	0	0	0	0	0	0	0	0	0	0	9834	20847	7714	244	111	0	0	0	0	0
	C	142	0	0	0	13582	589	8218	8	25	1	3	0	0	0	0	0	0	0	0	0	0	25583	876	16832	15	21	0	1	0	0	0	0	0	0	0	0	0	0	22095	884	15740	20	9	1	0	0	0	1
	A	143	0	0	0	22405	17	4	0	0	0	0	0	0	0	0	0	0	0	0	0	0	43299	26	3	0	0	0	0	0	0	0	0	0	0	0	0	0	0	38712	34	3	1	0	0	0	0	0	0
ES7d	C	144	1	0	-1	21336	1072	10	1	7	0	0	0	0	0	0	0	0	0	0	0	0	42054	1255	15	1	3	0	0	0	0	0	0	0	0	0	0	0	0	37861	879	7	1	2	0	0	0	0	0
	G	145	0	0	0	22372	44	10	0	0	0	0	0	0	0	0	0	0	0	0	0	0	43285	37	5	0	1	0	0	0	0	0	0	0	0	0	0	0	0	38709	38	3	0	0	0	0	0	0	0
ES6d	A	146	3	1	-2	4912	15856	982	645	31	0	0	0	0	0	0	0	0	0	0	0	0	6887	34932	638	859	10	0	1	1	0	0	0	0	0	0	0	0	0	6524	31194	480	542	7	2	1	0	0	0
ES5i	G	147	0	2	2	1425	111	20878	4	0	2	0	0	6	0	0	0	0	0	0	0	0	1446	242	41606	17	5	0	1	0	11	0	0	0	0	0	0	0	0	996	264	37462	16	1	1	1	0	9	0
ES4i	A	148	0	1	1	1342	21077	3	2	2	0	0	0	0	0	0	0	0	0	0	0	0	1300	42011	12	2	3	0	0	0	0	0	0	0	0	0	0	0	0	910	37828	8	1	2	1	0	0	0	0
	A	149	0	0	0	22410	7	5	1	1	1	1	0	0	0	0	0	0	0	0	0	0	43301	16	10	1	0	0	0	0	0	0	0	0	0	0	0	0	0	38727	9	7	7	0	0	0	0	0	0
	G	150	0	0	0	22410	5	7	3	1	0	0	0	0	0	0	0	0	0	0	0	0	43300	4	21	3	0	0	0	0	0	0	0	0	0	0	0	0	0	38726	4	19	0	1	0	0	0	0	0
ES3i	A	151	0	2	2	411	13	21999	3	0	0	0	0	0	0	0	0	0	0	0	0	0	644	24	42656	4	0	0	0	0	0	0	0	0	0	0	0	0	0	382	32	38331	5	0	0	0	0	0	0
	G	152	0	0	0
	A	153	0	0	0
ES2d	A	154	4	3	-1
	G	155	0	0	0
	A	156	0	0	0
ES1i	A	157	0	1	1
	A	158	1	1	0
	A	159	0	0	0
	G	160	0	0	0
	A	161	0	0	0
	A	162	1	1	0
3' end	G	163	1	1	0
Total
[truncated: 7 more columns]

## Sheet: RPS12_H2-RNAi Ext vs IPs R1
RPS12_KREH2-RNAi_mtRNA vs IPs_R1
						J19 - H2 RNAi 0Day Input																	J22 - H2 RNAi 0Day F1 IP																	J25 - H2 RNAi 0Day RESC6 IP
			no of Ts present before that position			# reads with indicated # Ts present before that position																	# reads with indicated # Ts present before that position																	# reads with indicated # Ts present before that position
	sequence	T-stripped	pre-edited	edited	editing events; del = -; ins = +	0	1	2	3	4	5	6	7	8	9	10	11	12	13	14	15	16	0	1	2	3	4	5	6	7	8	9	10	11	12	13	14	15	16	0	1	2	3	4	5	6	7	8	9
	C	1
5' end	A	2
	A	3
	A	4
	C	5
	A	6
	C	7
	G	8
	A	9
	A	10
	A	11
	C	12
	A	13
	A	14
	A	15
	C	16	0	0	0	40287	0	0	0	0	0	0	0	0	0	0	0	0	0	0	0	0	40051	0	0	0	0	0	0	0	0	0	0	0	0	0	0	0	0	36461	0	0	0	0	0	0	0	0	0
	A	17	1	1	0	242	40041	2	2	0	0	0	0	0	0	0	0	0	0	0	0	0	230	39817	3	0	0	1	0	0	0	0	0	0	0	0	0	0	0	293	36164	4	0	0	0	0	0	0	0
	A	18	0	0	0	40236	15	17	19	0	0	0	0	0	0	0	0	0	0	0	0	0	40013	17	9	11	1	0	0	0	0	0	0	0	0	0	0	0	0	36400	25	6	26	4	0	0	0	0	0
	A	19	0	0	0	40189	48	43	6	0	1	0	0	0	0	0	0	0	0	0	0	0	39965	49	32	4	1	0	0	0	0	0	0	0	0	0	0	0	0	36325	78	52	6	0	0	0	0	0	0
	G	20	0	0	0	40146	66	59	6	3	5	2	0	0	0	0	0	0	0	0	0	0	39958	40	44	8	0	0	1	0	0	0	0	0	0	0	0	0	0	36274	86	86	12	0	0	3	0	0	0
	A	21	1	1	0	3180	36863	176	44	12	1	2	1	2	6	0	0	0	0	0	0	0	2965	36933	121	25	4	0	0	0	0	3	0	0	0	0	0	0	0	6151	30039	213	37	10	0	5	0	0	5
	A	22	0	0	0	37273	970	1972	56	6	2	8	0	0	0	0	0	0	0	0	0	0	37384	743	1864	36	14	2	7	0	1	0	0	0	0	0	0	0	0	31225	1517	3602	76	24	4	13	0	0	0
ES76i	A	23	0	1	1	38164	1739	250	89	32	6	5	2	0	0	0	0	0	0	0	0	0	38279	1444	237	57	13	15	3	3	0	0	0	0	0	0	0	0	0	32519	3348	433	119	22	6	7	7	0	0
	A	24	0	0	0	38663	1110	114	224	39	26	38	6	64	3	0	0	0	0	0	0	0	38695	926	94	192	25	29	25	7	58	0	0	0	0	0	0	0	0	33698	2048	158	346	57	34	44	8	68	0
	A	25	0	0	0	37044	950	186	190	1597	242	46	6	2	24	0	0	0	0	0	0	0	37283	773	118	144	1436	238	28	2	4	25	0	0	0	0	0	0	0	30916	1693	202	338	2777	459	43	6	4	20
ES75i	G	26	0	4	4	35699	369	1799	152	1307	902	50	8	1	0	0	0	0	0	0	0	0	36240	257	1659	116	1031	723	23	1	1	0	0	0	0	0	0	0	0	28311	524	3230	212	2461	1664	51	5	2	1
ES74i	G	27	0	8	8	35520	317	179	111	34	1566	72	95	2190	65	11	18	87	14	6	1	0	36065	198	151	66	13	1460	80	73	1777	27	11	17	84	20	8	0	1	27987	351	209	136	48	2906	139	199	4151	87
	C	28	0	0	0	39734	364	109	50	26	0	3	1	0	0	0	0	0	0	0	0	0	39691	250	63	30	15	1	1	0	0	0	0	0	0	0	0	0	0	35870	389	126	50	15	2	7	2	0	0
	G	29	0	0	0	40163	71	29	23	1	0	0	0	0	0	0	0	0	0	0	0	0	39956	74	17	3	0	1	0	0	0	0	0	0	0	0	0	0	0	36313	87	42	15	4	0	0	0	0	0
ES73i	A	30	0	1	1	35545	4377	112	125	63	10	46	0	8	1	0	0	0	0	0	0	0	36083	3684	104	93	53	9	23	0	2	0	0	0	0	0	0	0	0	28125	7951	117	127	84	12	37	4	3	0
ES72i	G	31	0	1	1	35360	4410	277	120	60	12	9	0	0	3	10	21	4	1	0	0	0	35949	3721	200	81	51	11	1	0	0	3	8	16	9	1	0	0	0	27891	8054	258	135	61	12	3	0	3	1
ES71i	G	32	0	1	1	35517	4252	207	195	71	26	17	0	2	0	0	0	0	0	0	0	0	36026	3650	168	106	63	17	19	0	1	0	0	1	0	0	0	0	0	28064	7862	265	142	70	28	20	1	5	3
	A	33	0	0	0	39412	388	247	172	23	15	24	1	5	0	0	0	0	0	0	0	0	39438	284	170	107	21	13	13	3	1	0	0	0	1	0	0	0	0	35404	518	252	193	30	26	35	0	3	0
ES70d	G	34	6	5	-1	223	477	368	160	109	4162	34725	58	4	0	0	1	0	0	0	0	0	124	373	288	146	90	3544	35429	52	5	0	0	0	0	0	0	0	0	240	603	516	193	145	7433	27285	39	7	0
ES69i	A	35	0	1	1	35271	4693	90	68	46	30	53	7	29	0	0	0	0	0	0	0	0	35841	3975	78	57	34	21	27	0	17	0	1	0	0	0	0	0	0	27809	8340	84	70	59	23	54	7	14	0
ES68i	G	36	0	1	1	35259	4648	137	147	39	25	27	1	2	0	0	1	1	0	0	0	0	35823	3916	104	114	43	22	20	3	2	1	1	1	1	0	0	0	0	27836	8251	140	115	60	36	16	0	1	2
ES67d	G	37	1	0	-1	4728	35061	101	239	35	22	87	0	3	0	9	2	0	0	0	0	0	3939	35683	87	205	33	21	71	1	3	0	6	2	0	0	0	0	0	8342	27621	113	245	22	26	83	2	0	0
ES66i	G	38	0	2	2	35268	177	4601	36	58	8	13	22	95	3	0	0	2	4	0	0	0	35846	128	3861	37	37	8	16	19	87	1	3	3	4	0	1	0	0	27798	144	8257	60	39	9	14	15	117	1
ES65i	G	39	0	2	2	35005	485	4567	115	46	64	0	3	0	2	0	0	0	0	0	0	0	35671	383	3833	63	35	64	1	1	0	0	0	0	0	0	0	0	0	27587	506	8159	100	34	67	0	6	2	0
ES64i	A	40	0	3	3	35055	292	295	4465	46	7	91	35	1	0	0	0	0	0	0	0	0	35641	222	248	3751	34	9	123	22	1	0	0	0	0	0	0	0	0	27644	318	335	8021	26	11	84	22	0	0
	C	41	0	0	0	39369	505	329	67	17	0	0	0	0	0	0	0	0	0	0	0	0	39282	403	279	68	16	0	1	2	0	0	0	0	0	0	0	0	0	35736	422	207	75	19	2	0	0	0	0
ES63d	G	42	1	0	-1	6320	33933	24	6	2	1	1	0	0	0	0	0	0	0	0	0	0	5412	34607	23	7	1	1	0	0	0	0	0	0	0	0	0	0	0	9490	26918	33	10	2	7	1	0	0	0
ES62i	G	43	0	4	4	34846	494	225	272	4348	77	4	17	3	0	0	0	0	1	0	0	0	35526	335	167	252	3655	96	3	15	2	0	0	0	0	0	0	0	0	27551	336	232	289	7978	59	4	11	1	0
ES61i	A	44	0	4	4	34648	676	316	341	4297	6	3	0	0	0	0	0	0	0	0	0	0	35297	581	249	292	3628	4	0	0	0	0	0	0	0	0	0	0	0	27455	509	257	294	7934	8	0	3	1	0
ES60i	G	45	0	3	3	33604	882	202	5352	205	40	2	0	0	0	0	0	0	0	0	0	0	34370	760	141	4603	139	34	3	1	0	0	0	0	0	0	0	0	0	26690	628	195	8647	268	33	0	0	0	0
ES59i	A	46	0	4	4	33533	25	91	2152	4476	7	2	1	0	0	0	0	0	0	0	0	0	34295	15	98	1904	3733	5	0	0	1	0	0	0	0	0	0	0	0	26659	30	85	1624	8054	6	1	1	1	0
ES58i	G	47	0	1	1	33474	4510	36	37	2225	2	3	0	0	0	0	0	0	0	0	0	0	34254	3784	31	50	1928	1	3	0	0	0	0	0	0	0	0	0	0	26587	8083	55	53	1674	1	7	1	0	0
ES57i	A	48	0	2	2	33455	1105	4526	27	1169	1	4	0	0	0	0	0	0	0	0	0	0	34257	949	3778	15	1048	1	0	0	0	2	1	0	0	0	0	0	0	26594	801	8101	24	933	4	1	0	0	3
ES56i	A	49	0	2	2	33417	57	6785	22	4	0	1	1	0	0	0	0	0	0	0	0	0	34211	50	5761	17	11	1	0	0	0	0	0	0	0	0	0	0	0	26548	47	9832	21	8	2	3	0	0	0
ES55i	A	50	0	1	1	33406	5729	1135	5	10	1	0	0	0	1	0	0	0	0	0	0	0	34201	4852	977	11	7	3	0	0	0	0	0	0	0	0	0	0	0	26564	9107	778	11	1	0	0	0	0	0
ES54i	G	51	0	1	1	33467	6548	207	19	43	1	0	1	0	1	0	0	0	0	0	0	0	34213	5538	226	21	48	2	0	3	0	0	0	0	0	0	0	0	0	26662	9464	284	12	34	5	0	0	0	0
	A	52	0	0	0	39021	92	1095	9	1	63	6	0	0	0	0	0	0	0	0	0	0	38917	74	974	13	2	66	4	0	1	0	0	0	0	0	0	0	0	35485	137	783	6	4	42	3	0	1	0
	G	53	0	0	0	40137	62	80	3	2	2	1	0	0	0	0	0	0	0	0	0	0	39879	80	88	1	1	1	0	0	1	0	0	0	0	0	0	0	0	36335	61	60	3	1	1	0	0	0	0
ES53i	C	54	0	1	1	35427	4841	8	8	3	0	0	0	0	0	0	0	0	0	0	0	0	36133	3907	6	3	2	0	0	0	0	0	0	0	0	0	0	0	0	28838	7615	3	1	4	0	0	0	0	0
	C	55	0	0	0	40270	13	4	0	0	0	0	0	0	0	0	0	0	0	0	0	0	40031	15	5	0	0	0	0	0	0	0	0	0	0	0	0	0	0	36438	17	6	0	0	0	0	0	0	0
	G	56	0	0	0	38636	1645	6	0	0	0	0	0	0	0	0	0	0	0	0	0	0	38448	1600	3	0	0	0	0	0	0	0	0	0	0	0	0	0	0	34560	1897	4	0	0	0	0	0	0	0
ES52d	C	57	2	0	-2	7183	163	32940	1	0	0	0	0	0	0	0	0	0	0	0	0	0	6182	169	33693	2	3	2	0	0	0	0	0	0	0	0	0	0	0	10075	133	26244	7	2	0	0	0	0	0
	G	58	0	0	0	40236	50	0	0	1	0	0	0	0	0	0	0	0	0	0	0	0	39981	70	0	0	0	0	0	0	0	0	0	0	0	0	0	0	0	36407	51	3	0	0	0	0	0	0	0
	A	59	0	0	0	40076	99	40	51	1	9	1	10	0	0	0	0	0	0	0	0	0	39815	110	31	73	1	7	5	9	0	0	0	0	0	0	0	0	0	36287	72	27	60	1	10	1	3	0	0
ES51i	G	60	0	2	2	33049	432	6732	65	2	2	3	2	0	0	0	0	0	0	0	0	0	33850	471	5625	101	0	0	2	2	0	0	0	0	0	0	0	0	0	26348	391	9633	84	1	0	1	3	0	0
	C	61	0	0	0	40089	148	31	16	0	1	2	0	0	0	0	0	0	0	0	0	0	39867	140	28	14	0	1	1	0	0	0	0	0	0	0	0	0	0	36313	113	16	16	0	3	0	0	0	0
	C	62	0	0	0	40277	7	1	2	0	0	0	0	0	0	0	0	0	0	0	0	0	40041	7	3	0	0	0	0	0	0	0	0	0	0	0	0	0	0	36457	3	0	1	0	0	0	0	0	0
	C	63	0	0	0	40188	93	6	0	0	0	0	0	0	0	0	0	0	0	0	0	0	39923	122	4	1	1	0	0	0	0	0	0	0	0	0	0	0	0	36365	91	3	0	2	0	0	0	0	0
	A	64	0	0	0	40070	205	7	1	0	0	0	3	0	1	0	0	0	0	0	0	0	39783	256	8	4	0	0	0	0	0	0	0	0	0	0	0	0	0	36281	170	9	1	0	0	0	0	0	0
	G	65	0	0	0	39769	161	234	106	3	7	0	1	6	0	0	0	0	0	0	0	0	39513	153	297	82	1	1	0	0	4	0	0	0	0	0	0	0	0	36069	119	162	99	1	5	1	1	4	0
ES50i	C	66	0	2	2	34406	187	5644	26	6	18	0	0	0	0	0	0	0	0	0	0	0	35229	154	4597	28	4	38	0	0	0	1	0	0	0	0	0	0	0	28157	120	8123	37	8	15	0	0	0	1
	C	67	0	0	0	38679	1572	32	4	0	0	0	0	0	0	0	0	0	0	0	0	0	38484	1528	36	3	0	0	0	0	0	0	0	0	0	0	0	0	0	34549	1884	28	0	0	0	0	0	0	0
	G	68	0	0	0	38691	1511	42	41	2	0	0	0	0	0	0	0	0	0	0	0	0	38513	1469	37	31	1	0	0	0	0	0	0	0	0	0	0	0	0	34572	1821	35	30	3	0	0	0	0	0
	G	69	0	0	0	37231	393	2457	69	40	86	2	7	2	0	0	0	0	0	0	0	0	36609	382	2865	61	40	92	1	1	0	0	0	0	0	0	0	0	0	34337	301	1671	52	32	66	2	0	0	0
ES49i	A	70	0	1	1	31955	7960	295	45	17	5	5	5	0	0	0	0	0	0	0	0	0	32733	6897	342	37	21	11	3	7	0	0	0	0	0	0	0	0	0	25541	10561	285	40	17	7	2	8	0	0
	A	71	0	0	0	37344	346	242	151	2120	63	13	1	7	0	0	0	0	0	0	0	0	36809	344	219	166	2451	51	8	2	1	0	0	0	0	0	0	0	0	34483	278	185	115	1349	37	7	1	6	0
	C	72	0	0	0	39779	465	31	8	1	2	0	0	0	1	0	0	0	0	0	0	0	39550	451	37	10	0	3	0	0	0	0	0	0	0	0	0	0	0	35965	454	31	5	4	2	0	0	0	0
	C	73	0	0	0	40111	155	15	5	1	0	0	0	0	0	0	0	0	0	0	0	0	39834	188	23	3	0	0	0	0	3	0	0	0	0	0	0	0	0	36273	165	18	4	0	0	1	0	0	0
	G	74	0	0	0	40062	67	146	10	2	0	0	0	0	0	0	0	0	0	0	0	0	39873	61	111	4	2	0	0	0	0	0	0	0	0	0	0	0	0	36272	38	143	4	3	1	0	0	0	0
	A	75	0	0	0	39168	416	212	113	41	326	9	0	2	0	0	0	0	0	0	0	0	38934	444	273	113	29	244	14	0	0	0	0	0	0	0	0	0	0	35533	343	209	97	26	245	7	0	1	0
	C	76	0	0	0	39426	425	110	273	50	3	0	0	0	0	0	0	0	0	0	0	0	39162	494	126	236	30	0	0	1	0	2	0	0	0	0	0	0	0	35708	406	100	223	22	0	0	2	0	0
	G	77	0	0	0	40160	91	20	16	0	0	0	0	0	0	0	0	0	0	0	0	0	39920	90	26	15	0	0	0	0	0	0	0	0	0	0	0	0	0	36374	64	10	13	0	0	0	0	0	0
ES48i	G	78	0	1	1	31911	7693	232	401	28	17	1	2	2	0	0	0	0	0	0	0	0	32641	6722	235	393	36	14	5	2	2	0	1	0	0	0	0	0	0	25556	10365	192	300	33	9	2	4	0	0
ES47i	A	79	0	1	1	31346	7286	853	702	28	47	6	9	1	0	1	1	7	0	0	0	0	32147	6276	975	569	25	42	4	10	0	0	0	0	2	1	0	0	0	25069	10024	674	628	19	32	5	7	0	1
ES46i	G	80	0	2	2	31045	2140	6787	188	18	19	1	51	11	24	2	1	0	0	0	0	0	31400	2589	5723	200	21	19	9	44	5	36	3	1	1	0	0	0	0	24868	1696	9646	162	19	15	5	33	2	13
ES45i	A	81	0	1	1	32233	7655	235	82	34	27	3	3	15	0	0	0	0	0	0	0	0	33097	6519	260	104	32	25	0	2	11	1	0	0	0	0	0	0	0	25782	10295	217	106	23	22	3	0	13	0
ES44i	G	82	0	1	1	26409	12735	575	322	33	65	143	0	1	4	0	0	0	0	0	0	0	25993	12823	653	392	30	46	109	0	0	1	1	0	3	0	0	0	0	21408	13982	545	265	40	65	151	0	0	3
	C	83	0	0	0	39203	707	162	200	11	3	0	1	0	0	0	0	0	0	0	0	0	38765	802	193	266	19	2	0	3	1	0	0	0	0	0	0	0	0	35447	677	157	166	10	1	1	2	0	0
ES43d	C	84	2	0	-2	15108	692	24458	27	1	1	0	0	0	0	0	0	0	0	0	0	0	15883	847	23279	36	4	2	0	0	0	0	0	0	0	0	0	0	0	16186	705	19536	28	5	0	0	0	1	0
ES42d	G	85	4	0	-4	16392	518	98	103	23169	6	1	0	0	0	0	0	0	0	0	0	0	17661	451	140	142	21635	21	1	0	0	0	0	0	0	0	0	0	0	17391	529	96	121	18313	11	0	0	0	0
ES41i	A	86	0	1	1	27007	11837	1183	99	125	26	8	2	0	0	0	0	0	0	0	0	0	26215	11785	1701	122	189	25	11	2	1	0	0	0	0	0	0	0	0	22055	13061	1066	103	145	22	7	1	0	1
ES40i	A	87	0	4	4	26176	1033	1160	627	11209	70	5	3	4	0	0	0	0	0	0	0	0	25260	1220	1601	766	11120	74	6	3	0	0	0	1	0	0	0	0	0	21403	915	1022	583	12461	68	5	3	0	0
ES39i	A	88	1	3	2	2563	25073	530	11796	257	40	15	5	4	0	1	2	0	1	0	0	0	3249	23792	611	11936	387	51	17	1	6	0	0	0	1	0	0	0	0	2530	20194	504	12942	242	27	16	4	1	0
ES38i	A	89	0	1	1	23786	12865	2116	1083	192	122	26	86	9	1	0	0	0	1	0	0	0	22389	13106	2416	1568	324	133	29	78	8	0	0	0	0	0	0	0	0	19043	14107	1920	1006	158	139	17	70	1	0
ES37i	A	90	0	1	1	25015	12497	1184	459	299	280	113	124	310	5	0	1	0	0	0	0	0	23921	12800	1662	454	386	267	106	110	340	3	2	0	0	0	0	0	0	20277	13703	1047	416	269	320	83	90	255	1
	A	91	0	0	0	34923	1262	2706	786	291	105	194	7	7	4	1	0	1	0	0	0	0	33865	1574	2952	993	318	105	228	8	7	0	0	0	1	0	0	0	0	31415	1242	2503	751	280	77	180	5	3	2
ES36i	G	92	0	4	4	24034	2960	729	1797	10488	202	50	5	11	6	5	0	0	0	0	0	0	22415	3463	843	2175	10720	293	85	12	21	8	12	4	0	0	0	0	0	19229	2827	676	1691	11831	145	42	3	4	4
ES35i	G	93	0	3	3	26205	1859	905	10659	495	144	16	3	0	0	0	0	1	0	0	0	0	24627	2444	1142	10953	665	203	12	3	0	1	0	0	0	1	0	0	0	21412	1671	797	12024	415	116	16	8	2	0
	G	94	0	0	0	36050	2694	379	588	417	94	32	29	2	1	0	0	1	0	0	0	0	35058	3174	552	636	469	90	35	37	0	0	0	0	0	0	0	0	0	32743	2330	332	569	369	61	35	18	1	0
	A	95	0	0	0	35549	2112	1463	441	141	48	57	100	32	306	32	5	0	1	0	0	0	34115	2771	1960	570	158	80	50	80	30	203	31	2	1	0	0	0	0	32284	2042	1247	358	118	47	45	75	26	195
ES34i	G	96	0	1	1	26001	11697	1561	731	73	74	45	12	6	65	6	7	9	0	0	0	0	25047	11998	1786	942	104	51	33	13	9	55	6	5	2	0	0	0	0	21141	12993	1405	685	62	66	35	17	11	36
ES33i	G	97	0	2	2	21430	1152	13346	2806	1012	176	247	102	11	0	2	3	0	0	0	0	0	18640	1216	15594	2994	1085	190	212	106	10	4	0	0	0	0	0	0	0	16599	1141	14765	2691	829	164	200	65	5	0
	C	98	0	0	0	34809	3641	259	1503	50	12	6	6	1	0	0	0	0	0	0	0	0	31950	5398	222	2415	52	9	3	2	0	0	0	0	0	0	0	0	0	31257	3617	283	1217	62	10	11	2	1	0
	G	99	0	0	0	36267	1428	55	2508	20	6	1	0	2	0	0	0	0	0	0	0	0	33221	2326	49	4408	31	10	6	0	0	0	0	0	0	0	0	0	0	32725	1222	88	2392	28	3	3	0	0	0
ES32i	G	100	0	2	2	20378	5262	13755	225	344	39	16	29	221	16	2	0	0	0	0	0	0	17434	7971	13991	214	198	38	10	10	168	16	1	0	0	0	0	0	0	15588	5139	14745	247	481	42	23	17	153	21
ES31i	G	101	0	8	8	20264	4478	1578	125	328	87	123	296	12732	267	9	0	0	0	0	0	0	17193	7415	1220	131	215	70	131	246	13207	221	1	1	0	0	0	0	0	15462	4247	1851	182	402	124	177	321	13491	199
ES30i	G	102	0	2	2	20499	281	17985	757	707	44	3	7	4	0	0	0	0	0	0	0	0	17533	253	21135	645	448	29	4	2	1	0	1	0	0	0	0	0	0	15683	381	18609	915	810	40	9	5	9	0
ES29i	A	103	0	4	4	24006	1131	447	437	14179	30	52	1	3	1	0	0	0	0	0	0	0	23987	798	366	427	14385	39	43	3	2	0	1	0	0	0	0	0	0	18662	1505	577	547	15067	46	48	3	3	3
ES28i	G	104	0	2	2	20974	4407	14129	644	35	33	8	54	2	0	1	0	0	0	0	0	0	17670	7375	14331	568	32	25	11	33	3	0	3	0	0	0	0	0	0	16383	4083	15094	773	31	37	6	45	7	0
	G	105	0	0	0	34708	1275	262	3932	34	58	3	15	0	0	0	0	0	0	0	0	0	31542	1202	236	6952	38	55	4	22	0	0	0	0	0	0	0	0	0	31118	1517	289	3406	48	59	4	19	0	0
ES27i	A	106	0	3	3	23266	659	634	15037	64	610	5	2	6	3	1	0	0	0	0	0	0	23466	662	494	14812	60	547	7	0	3	0	0	0	0	0	0	0	0	17658	695	774	16511	88	718	9	0	8	0
	G	107	0	0	0	33901	4868	1227	164	44	42	1	6	6	27	1	0	0	0	0	0	0	30424	7682	1615	154	67	57	2	8	7	35	0	0	0	0	0	0	0	30544	4351	1229	197	63	45	6	5	1	18
ES26i	A	108	0	2	2	22319	1917	15762	205	55	6	9	10	4	0	0	0	0	0	0	0	0	21898	2467	15445	135	65	12	9	19	0	1	0	0	0	0	0	0	0	16905	1943	17312	195	76	8	13	8	1	0
ES25i	G	109	0	1	1	17950	20250	1150	731	127	37	9	6	24	3	0	0	0	0	0	0	0	14728	22910	1572	662	109	25	1	2	39	1	2	0	0	0	0	0	0	12906	21195	1229	901	146	34	6	11	32	1
ES24d	C	110	3	1	-2	2637	21254	369	15939	39	43	5	1	0	0	0	0	0	0	0	0	0	2990	23766	383	12849	29	32	0	0	0	2	0	0	0	0	0	0	0	2875	22365	410	10724	33	49	3	0	0	1
	A	111	0	0	0	40000	198	60	28	0	0	0	1	0	0	0	0	0	0	0	0	0	39758	162	93	36	2	0	0	0	0	0	0	0	0	0	0	0	0	36154	191	85	30	0	0	0	1	0	0
ES23i	A	112	0	2	2	17831	2114	19923	197	121	49	34	13	5	0	0	0	0	0	0	0	0	15037	2174	22465	168	114	51	22	20	0	0	0	0	0	0	0	0	0	12746	2265	21018	206	125	52	25	23	0	0
Es22i	A	113	0	3	3	17708	2015	733	19115	521	120	39	23	0	1	0	3	6	3	0	0	0	14435	1991	744	22096	581	127	49	19	0	0	1	1	4	3	0	0	0	12662	2253	768	20038	532	138	30	29	3	0
Es21i	A	114	0	2	2	15925	1404	20587	1297	220	154	355	24	300	11	0	5	4	0	1	0	0	12725	1477	23582	1352	221	153	242	36	242	4	1	5	11	0	0	0	0	10866	1570	21603	1323	237	147	338	33	313	10
ES20i	A	115	0	1	1	15600	20398	1976	1134	721	222	79	127	16	0	4	0	1	8	0	1	0	12412	23290	2072	1072	693	285	83	101	27	3	1	3	4	2	3	0	0	10501	21361	1923	1325	792	272	118	136	17	6
	G	116	0	0	0	33880	2287	1543	731	616	501	93	307	204	27	9	21	56	10	2	0	0	33669	2404	1620	720	550	398	79	260	197	32	14	38	60	7	3	0	0	29613	2357	1792	759	689	500	111	288	244	25
	A	117	0	0	0	35066	1981	564	924	472	282	222	95	57	60	66	131	314	44	7	0	2	34982	2066	640	900	476	220	259	69	35	42	30	100	195	35	2	0	0	30596	2269	730	1081	531	300	242	141	62	85
ES19d	G	118	3	0	-3	21313	2633	644	14696	159	393	351	21	13	17	7	14	24	2	0	0	0	24277	2561	671	11462	147	490	375	10	8	6	4	15	22	2	0	1	0	22416	3093	782	9139	198	377	362	15	12	13
	G	119	0	0	0	34486	2933	656	1469	410	293	10	10	16	3	1	0	0	0	0	0	0	34435	2564	646	1494	515	349	12	6	28	2	0	0	0	0	0	0	0	29903	3342	710	1642	446	361	22	15	16	3
	G	120	0	0	0	34776	1813	987	1965	122	572	20	25	2	5	0	0	0	0	0	0	0	34573	1978	1080	1664	109	606	14	22	1	4	0	0	0	0	0	0	0	30097	2195	1151	2151	127	680	23	28	3	6
	G	121	1	1	0	1866	33670	1885	867	393	1516	58	22	6	3	1	0	0	0	0	0	0	2022	33515	1873	891	381	1255	92	18	3	1	0	0	0	0	0	0	0	2252	28725	2318	956	449	1676	52	24	4	4
	G	122	0	0	0	33960	3994	1176	621	106	373	35	21	1	0	0	0	0	0	0	0	0	33703	3979	1203	646	125	334	29	30	2	0	0	0	0	0	0	0	0	29294	4540	1222	696	188	468	25	25	2	1
ES18i	G	123	0	1	1	14749	24030	343	518	55	123	120	336	3	10	0	0	0	0	0	0	0	11756	26848	323	446	34	107	127	404	3	2	1	0	0	0	0	0	0	9470	25302	402	610	73	92	167	339	4	2
	G	124	0	0	0	34317	4761	155	208	455	62	33	288	5	3	0	0	0	0	0	0	0	34309	4582	165	163	490	43	33	261	5	0	0	0	0	0	0	0	0	29637	5407	241	250	566	70	30	252	6	2
ES17i	G	125	0	4	4	15407	460	4151	374	19546	173	167	3	3	3	0	0	0	0	0	0	0	12263	391	4291	412	22274	208	197	4	10	1	0	0	0	0	0	0	0	10248	518	4662	386	20274	180	186	4	3	0
ES16i	G	126	0	2	2	13438	874	25929	34	5	2	3	2	0	0	0	0	0	0	0	0	0	10496	870	28623	33	16	5	2	5	1	0	0	0	0	0	0	0	0	7962	852	27582	45	8	4	1	6	1	0
	A	127	0	0	0	32948	2532	2854	1627	16	292	8	5	1	0	0	1	3	0	0	0	0	33050	2480	2638	1594	16	258	12	2	0	0	0	0	1	0	0	0	0	28303	2781	3273	1795	22	253	22	7	0	0
ES15i	A	128	0	3	3	12913	3931	201	23200	12	12	16	0	0	0	0	2	0	0	0	0	0	10064	3919	128	25904	6	8	20	1	0	0	1	0	0	0	0	0	0	7347	4386	242	24420	13	18	34	0	0	0
	C	129	0	0	0	36880	2784	264	328	21	2	2	0	0	1	3	2	0	0	0	0	0	37670	1966	140	243	24	1	1	0	0	1	5	0	0	0	0	0	0	34349	1714	176	170	32	4	4	7	0	0
	C	130	0	0	0	39365	626	141	13	139	3	0	0	0	0	0	0	0	0	0	0	0	39166	646	108	14	114	3	0	0	0	0	0	0	0	0	0	0	0	35472	676	146	22	141	3	0	0	1	0
	C	131	0	0	0	39890	283	84	26	4	0	0	0	0	0	0	0	0	0	0	0	0	39701	248	74	20	7	1	0	0	0	0	0	0	0	0	0	0	0	35976	315	140	21	7	2	0	0	0	0
ES14d	G	132	3	0	-3	27746	3237	270	8985	21	25	1	2	0	0	0	0	0	0	0	0	0	29138	2623	239	8014	13	23	1	0	0	0	0	0	0	0	0	0	0	27282	2323	269	6548	11	23	5	0	0	0
ES13d	G	133	4	0	-4	26516	1287	1785	489	10179	20	2	3	5	0	0	1	0	0	0	0	0	27701	1117	1594	376	9250	9	1	1	2	0	0	0	0	0	0	0	0	24905	960	2067	367	8144	9	6	0	1	1
ES12i	G	134	0	1	1	12418	21121	296	6422	10	14	2	1	2	0	0	1	0	0	0	0	0	10486	23341	185	6013	16	10	0	0	0	0	0	0	0	0	0	0	0	8170	21036	343	6873	19	16	4	0	0	0
ES11d	A	135	2	1	-1	760	26366	5765	619	6730	5	39	3	0	0	0	0	0	0	0	0	0	727	27299	5173	518	6299	6	27	2	0	0	0	0	0	0	0	0	0	684	24759	3244	518	7212	5	33	6	0	0
	A	136	0	0	0	26786	13231	73	112	12	5	8	2	3	5	47	3	0	0	0	0	0	28418	11480	47	79	4	7	3	0	1	1	11	0	0	0	0	0	0	24237	12004	54	92	7	5	4	0	1	12
	A	137	0	0	0	32336	983	6892	52	9	2	3	8	2	0	0	0	0	0	0	0	0	32849	670	6487	32	4	2	4	3	0	0	0	0	0	0	0	0	0	28112	911	7370	54	2	1	4	7	0	0
	G	138	0	0	0	32955	319	6931	9	69	4	0	0	0	0	0	0	0	0	0	0	0	33295	193	6501	14	47	1	0	0	0	0	0	0	0	0	0	0	0	28731	263	7383	22	57	5	0	0	0	0
ES10i	A	139	0	1	1	11574	28609	36	44	18	0	2	4	0	0	0	0	0	0	0	0	0	9842	30135	40	26	6	1	0	1	0	0	0	0	0	0	0	0	0	7254	29103	50	43	7	0	1	3	0	0
ES9i	A	140	0	2	2	5548	6507	28171	27	4	12	3	1	1	2	3	0	5	3	0	0	0	5255	5010	29766	10	3	3	0	1	1	0	1	0	1	0	0	0	0	2886	4889	28642	29	2	9	0	0	2	0
ES8i	A	141	0	1	1	11500	21210	5730	1677	163	4	1	0	0	2	0	0	0	0	0	0	0	10358	23301	4597	1680	114	1	0	0	0	0	0	0	0	0	0	0	0	10390	21252	4041	636	138	3	1	0	0	0
	C	142	0	0	0	25962	989	13242	34	55	0	5	0	0	0	0	0	0	0	0	0	0	27591	757	11618	32	48	1	4	0	0	0	0	0	0	0	0	0	0	23698	926	11764	38	34	1	0	0	0	0
	A	143	0	0	0	40244	32	6	4	1	0	0	0	0	0	0	0	0	0	0	0	0	40018	23	8	1	1	0	0	0	0	0	0	0	0	0	0	0	0	36431	24	4	1	1	0	0	0	0	0
ES7d	C	144	1	0	-1	37448	2810	19	2	8	0	0	0	0	0	0	0	0	0	0	0	0	37606	2410	19	2	11	1	0	0	2	0	0	0	0	0	0	0	0	34849	1600	5	0	5	0	0	0	2	0
	G	145	0	0	0	40160	106	19	2	0	0	0	0	0	0	0	0	0	0	0	0	0	39949	92	10	0	0	0	0	0	0	0	0	0	0	0	0	0	0	36369	76	16	0	0	0	0	0	0	0
ES6d	A	146	3	1	-2	6998	28388	2702	2115	83	1	0	0	0	0	0	0	0	0	0	0	0	6481	29074	2456	1976	62	2	0	0	0	0	0	0	0	0	0	0	0	7591	26295	1388	1140	42	2	2	0	0	0
ES5i	G	147	0	2	2	4599	131	35541	9	3	0	0	0	4	0	0	0	0	0	0	0	0	4200	88	35750	5	2	1	0	0	5	0	0	0	0	0	0	0	0	2312	131	34006	6	0	0	0	0	6	0
ES4i	A	148	0	1	1	4449	35806	22	8	1	1	0	0	0	0	0	0	0	0	0	0	0	4146	35885	14	5	1	0	0	0	0	0	0	0	0	0	0	0	0	2227	34219	11	2	0	1	0	1	0	0
	A	149	0	0	0	40261	7	13	3	0	0	1	2	0	0	0	0	0	0	0	0	0	40018	14	15	1	0	2	1	0	0	0	0	0	0	0	0	0	0	36437	13	6	2	0	0	2	1	0	0
	G	150	0	0	0	40260	11	10	4	2	0	0	0	0	0	0	0	0	0	0	0	0	40019	7	19	4	1	0	0	0	1	0	0	0	0	0	0	0	0	36432	9	16	3	0	1	0	0	0	0
ES3i	A	151	0	2	2	1580	28	38678	1	0	0	0	0	0	0	0	0	0	0	0	0	0	1646	15	38384	4	2	0	0	0	0	0	0	0	0	0	0	0	0	817	30	35607	4	2	1	0	0	0	0
	G	152	0	0	0
	A	153	0	0	0
ES2d	A	154	4	3	-1
	G	155	0	0	0
	A	156	0	0	0
ES1i	A	157	0	1	1
	A	158	1	1	0
	A	159	0	0	0
	G	160	0	0	0
	A	161	0	0	0
	A	162	1	1	0
3' end	G	163	1	1	0
Total
[truncated: 7 more columns]

## Sheet: RPS12_H2-RNAi Ext vs IPs R2
RPS12_KREH2-RNAi_mtRNA vs IPs_R2
						J28 - H2 RNAi 0Day Input - Bio Rep																	J31 - H2 RNAi 0Day F1 IP - Bio Rep																	J34 - H2 RNAi 0Day - RESC6 IP - Bio Rep
			no of Ts present before that position			# reads with indicated # Ts present before that position																	# reads with indicated # Ts present before that position																	# reads with indicated # Ts present before that position
	sequence	T-stripped	pre-edited	edited	editing events; del = -; ins = +	0	1	2	3	4	5	6	7	8	9	10	11	12	13	14	15	16	0	1	2	3	4	5	6	7	8	9	10	11	12	13	14	15	16	0	1	2	3	4	5	6	7	8	9
	C	1
5' end	A	2
	A	3
	A	4
	C	5
	A	6
	C	7
	G	8
	A	9
	A	10
	A	11
	C	12
	A	13
	A	14
	A	15
	C	16	0	0	0	29852	0	0	0	0	0	0	0	0	0	0	0	0	0	0	0	0	34959	0	0	0	0	0	0	0	0	0	0	0	0	0	0	0	0	34911	0	0	0	0	0	0	0	0	0
	A	17	1	1	0	135	29716	1	0	0	0	0	0	0	0	0	0	0	0	0	0	0	307	34647	5	0	0	0	0	0	0	0	0	0	0	0	0	0	0	312	34598	1	0	0	0	0	0	0	0
	A	18	0	0	0	29817	20	9	6	0	0	0	0	0	0	0	0	0	0	0	0	0	34902	25	20	11	1	0	0	0	0	0	0	0	0	0	0	0	0	34864	22	10	14	0	0	0	1	0	0
	A	19	0	0	0	29779	32	36	4	0	0	0	1	0	0	0	0	0	0	0	0	0	34842	62	48	7	0	0	0	0	0	0	0	0	0	0	0	0	0	34781	70	56	4	0	0	0	0	0	0
	G	20	0	0	0	29774	29	39	5	2	0	3	0	0	0	0	0	0	0	0	0	0	34802	69	72	15	0	0	1	0	0	0	0	0	0	0	0	0	0	34775	72	55	6	1	1	1	0	0	0
	A	21	1	1	0	2107	27601	117	18	3	2	1	0	0	3	0	0	0	0	0	0	0	3558	31246	111	32	3	0	3	0	0	6	0	0	0	0	0	0	0	6015	28618	220	31	9	0	3	1	4	9
	A	22	0	0	0	27888	636	1265	48	11	3	1	0	0	0	0	0	0	0	0	0	0	31822	877	2195	46	9	4	6	0	0	0	0	0	0	0	0	0	0	29677	1540	3596	73	9	5	10	1	0	0
ES76i	A	23	0	1	1	28445	1132	193	40	37	1	2	2	0	0	0	0	0	0	0	0	0	32934	1695	220	64	21	21	2	2	0	0	0	0	0	0	0	0	0	31031	3319	407	99	34	5	12	4	0	0
	A	24	0	0	0	28735	749	109	143	23	22	19	8	43	1	0	0	0	0	0	0	0	33242	1205	100	241	29	23	38	6	74	1	0	0	0	0	0	0	0	32075	2109	151	360	32	27	64	10	81	2
	A	25	0	0	0	27657	645	130	119	1087	157	30	7	2	15	2	1	0	0	0	0	0	31681	921	124	209	1649	285	46	8	7	28	0	0	1	0	0	0	0	29275	1754	212	301	2809	487	27	13	2	26
ES75i	G	26	0	4	4	26789	262	1239	107	839	584	25	3	1	3	0	0	0	0	0	0	0	30487	323	1902	137	1127	937	37	3	5	1	0	0	0	0	0	0	0	26837	484	3292	218	2338	1694	38	5	2	0
ES74i	G	27	0	8	8	26670	245	115	91	20	1078	44	66	1397	40	4	18	41	18	4	1	0	30260	257	150	84	18	1663	91	68	2149	45	13	22	86	50	3	0	0	26478	354	194	125	47	2966	158	186	4039	86
	C	28	0	0	0	29475	244	72	41	17	1	1	0	0	1	0	0	0	0	0	0	0	34533	287	95	27	9	2	5	0	0	0	0	0	1	0	0	0	0	34317	417	96	55	16	3	5	0	1	0
	G	29	0	0	0	29776	50	17	8	1	0	0	0	0	0	0	0	0	0	0	0	0	34855	76	19	9	0	0	0	0	0	0	0	0	0	0	0	0	0	34763	101	31	14	1	0	0	0	1	0
ES73i	A	30	0	1	1	26703	2889	90	81	42	8	33	2	1	0	1	0	0	0	2	0	0	30311	4324	105	86	83	13	30	2	3	0	1	0	1	0	0	0	0	26631	7911	119	152	51	13	29	2	2	0
ES72i	G	31	0	1	1	26554	2928	187	79	56	17	4	0	0	0	5	17	3	2	0	0	0	30184	4378	181	106	49	3	4	0	3	2	9	34	5	1	0	0	0	26411	7982	253	132	81	18	3	1	1	1
ES71i	G	32	0	1	1	26642	2846	167	122	55	10	8	0	1	1	0	0	0	0	0	0	0	30306	4285	178	86	67	21	12	0	2	2	0	0	0	0	0	0	0	26595	7791	206	194	89	13	19	1	1	2
	A	33	0	0	0	29230	309	154	117	10	14	13	0	5	0	0	0	0	0	0	0	0	34347	248	181	110	35	18	13	1	6	0	0	0	0	0	0	0	0	33878	511	237	203	18	24	32	4	3	1
ES70d	G	34	6	5	-1	170	365	252	131	90	2766	26048	27	2	1	0	0	0	0	0	0	0	138	385	301	137	107	4156	29684	43	7	1	0	0	0	0	0	0	0	233	595	484	187	139	7369	25875	25	4	0
ES69i	A	35	0	1	1	26464	3131	90	55	35	19	42	4	12	0	0	0	0	0	0	0	0	30071	4613	93	58	36	28	35	1	24	0	0	0	0	0	0	0	0	26350	8290	90	71	22	21	48	1	18	0
ES68i	G	36	0	1	1	26481	3091	92	94	47	19	19	2	6	1	0	0	0	0	0	0	0	30066	4563	107	139	44	18	17	2	1	1	0	1	0	0	0	0	0	26386	8221	114	105	40	19	14	7	2	1
ES67d	G	37	1	0	-1	3147	26303	94	191	27	31	54	0	0	0	3	0	2	0	0	0	0	4546	29973	106	203	31	20	72	3	3	0	1	0	1	0	0	0	0	8256	26167	88	260	21	27	81	2	0	0
ES66i	G	38	0	2	2	26468	119	3039	36	48	16	9	21	90	1	0	1	4	0	0	0	0	30085	122	4531	37	48	6	20	19	84	1	1	2	3	0	0	0	0	26331	130	8165	37	51	10	12	27	130	4
ES65i	G	39	0	2	2	26295	356	3008	91	44	46	2	9	1	0	0	0	0	0	0	0	0	29955	345	4480	82	39	48	3	7	0	0	0	0	0	0	0	0	0	26112	496	8089	101	29	76	2	6	0	0
ES64i	A	40	0	3	3	26316	235	226	2928	28	5	86	28	0	0	0	0	0	0	0	0	0	29944	245	246	4353	32	9	103	27	0	0	0	0	0	0	0	0	0	26255	252	303	7953	32	13	80	22	1	0
	C	41	0	0	0	29162	352	268	45	23	2	0	0	0	0	0	0	0	0	0	0	0	34169	393	304	67	23	0	0	3	0	0	0	0	0	0	0	0	0	34249	391	178	65	21	4	1	1	0	0
ES63d	G	42	1	0	-1	4371	25451	18	6	6	0	0	0	0	0	0	0	0	0	0	0	0	5980	28933	26	18	2	0	0	0	0	0	0	0	0	0	0	0	0	9233	25636	27	13	2	0	0	0	0	0
ES62i	G	43	0	4	4	26154	311	187	230	2881	68	5	16	0	0	0	0	0	0	0	0	0	29803	361	180	230	4264	95	3	21	2	0	0	0	0	0	0	0	0	26159	278	209	285	7931	40	3	6	0	0
ES61i	A	44	0	4	4	25995	524	227	278	2821	5	1	0	0	0	1	0	0	0	0	0	0	29654	513	246	306	4227	8	4	0	0	0	0	0	1	0	0	0	0	26137	391	211	276	7889	4	2	0	0	0
ES60i	G	45	0	3	3	25248	661	130	3613	182	15	2	1	0	0	0	0	0	0	0	0	0	28652	692	161	5265	163	22	3	0	0	0	1	0	0	0	0	0	0	25404	579	164	8477	240	42	4	1	0	0
ES59i	A	46	0	4	4	25187	11	82	1598	2965	6	1	1	1	0	0	0	0	0	0	0	0	28593	17	105	1943	4294	5	0	1	0	1	0	0	0	0	0	0	0	25392	14	65	1459	7977	4	0	0	0	0
ES58i	G	47	0	1	1	25130	3004	33	49	1629	1	5	0	1	0	0	0	0	0	0	0	0	28562	4329	43	35	1978	3	9	0	0	0	0	0	0	0	0	0	0	25332	8000	34	48	1485	2	10	0	0	0
ES57i	A	48	0	2	2	25111	875	3007	21	836	1	0	0	0	1	0	0	0	0	0	0	0	28570	884	4329	13	1154	7	0	0	0	2	0	0	0	0	0	0	0	25344	745	8000	22	792	5	1	1	0	1
ES56i	A	49	0	2	2	25093	40	4690	23	4	1	0	1	0	0	0	0	0	0	0	0	0	28523	48	6362	24	2	0	0	0	0	0	0	0	0	0	0	0	0	25314	32	9541	16	5	1	1	0	1	0
ES55i	A	50	0	1	1	25076	3861	906	5	1	1	1	1	0	0	0	0	0	0	0	0	0	28511	5530	910	4	1	3	0	0	0	0	0	0	0	0	0	0	0	25326	8851	728	1	2	3	0	0	0	0
ES54i	G	51	0	1	1	25105	4543	147	12	41	3	0	1	0	0	0	0	0	0	0	0	0	28557	6130	204	11	49	1	2	3	1	1	0	0	0	0	0	0	0	25392	9158	309	13	32	3	0	3	0	1
	A	52	0	0	0	28847	75	856	15	2	55	0	2	0	0	0	0	0	0	0	0	0	33922	81	888	7	4	56	1	0	0	0	0	0	0	0	0	0	0	33998	114	747	6	4	40	2	0	0	0
	G	53	0	0	0	29712	64	72	2	0	2	0	0	0	0	0	0	0	0	0	0	0	34830	51	71	3	0	4	0	0	0	0	0	0	0	0	0	0	0	34804	54	50	2	1	0	0	0	0	0
ES53i	C	54	0	1	1	26504	3336	9	1	0	0	2	0	0	0	0	0	0	0	0	0	0	30660	4285	4	9	0	1	0	0	0	0	0	0	0	0	0	0	0	27540	7357	5	8	1	0	0	0	0	0
	C	55	0	0	0	29833	17	2	0	0	0	0	0	0	0	0	0	0	0	0	0	0	34931	23	4	1	0	0	0	0	0	0	0	0	0	0	0	0	0	34897	13	1	0	0	0	0	0	0	0
	G	56	0	0	0	28717	1133	2	0	0	0	0	0	0	0	0	0	0	0	0	0	0	33197	1759	3	0	0	0	0	0	0	0	0	0	0	0	0	0	0	33080	1829	1	1	0	0	0	0	0	0
ES52d	C	57	2	0	-2	4988	146	24709	5	1	2	1	0	0	0	0	0	0	0	0	0	0	6677	176	28095	6	3	1	1	0	0	0	0	0	0	0	0	0	0	9784	127	24994	5	1	0	0	0	0	0
	G	58	0	0	0	29806	45	1	0	0	0	0	0	0	0	0	0	0	0	0	0	0	34911	45	2	1	0	0	0	0	0	0	0	0	0	0	0	0	0	34870	38	1	0	2	0	0	0	0	0
	A	59	0	0	0	29666	102	19	49	0	6	2	7	1	0	0	0	0	0	0	0	0	34744	114	30	49	4	9	4	4	1	0	0	0	0	0	0	0	0	34754	73	20	42	3	9	5	5	0	0
ES51i	G	60	0	2	2	24813	319	4646	68	4	0	2	0	0	0	0	0	0	0	0	0	0	28220	482	6177	72	0	0	7	1	0	0	0	0	0	0	0	0	0	25071	440	9319	72	3	1	1	4	0	0
	C	61	0	0	0	29683	130	24	12	0	0	3	0	0	0	0	0	0	0	0	0	0	34786	127	24	14	1	1	6	0	0	0	0	0	0	0	0	0	0	34776	99	22	13	1	0	0	0	0	0
	C	62	0	0	0	29846	4	1	1	0	0	0	0	0	0	0	0	0	0	0	0	0	34947	9	3	0	0	0	0	0	0	0	0	0	0	0	0	0	0	34902	7	0	2	0	0	0	0	0	0
	C	63	0	0	0	29749	100	3	0	0	0	0	0	0	0	0	0	0	0	0	0	0	34863	92	4	0	0	0	0	0	0	0	0	0	0	0	0	0	0	34802	100	8	0	1	0	0	0	0	0
	A	64	0	0	0	29675	167	6	4	0	0	0	0	0	0	0	0	0	0	0	0	0	34718	230	5	6	0	0	0	0	0	0	0	0	0	0	0	0	0	34701	199	7	4	0	0	0	0	0	0
	G	65	0	0	0	29473	125	177	67	2	0	0	0	8	0	0	0	0	0	0	0	0	34493	122	233	88	3	3	4	1	10	0	0	2	0	0	0	0	0	34538	113	170	79	3	6	1	0	1	0
ES50i	C	66	0	2	2	25742	139	3923	23	8	17	0	0	0	0	0	0	0	0	0	0	0	29768	158	4973	24	12	24	0	0	0	0	0	0	0	0	0	0	0	26856	134	7882	25	6	8	0	0	0	0
	C	67	0	0	0	28735	1098	18	1	0	0	0	0	0	0	0	0	0	0	0	0	0	33244	1690	25	0	0	0	0	0	0	0	0	0	0	0	0	0	0	33012	1863	35	0	1	0	0	0	0	0
	G	68	0	0	0	28727	1067	24	33	1	0	0	0	0	0	0	0	0	0	0	0	0	33266	1629	26	38	0	0	0	0	0	0	0	0	0	0	0	0	0	33034	1805	40	32	0	0	0	0	0	0
	G	69	0	0	0	27755	278	1689	49	19	59	1	2	0	0	0	0	0	0	0	0	0	31725	390	2646	69	22	99	1	7	0	0	0	0	0	0	0	0	0	32947	265	1598	33	20	46	0	2	0	0
ES49i	A	70	0	1	1	23944	5618	219	37	12	9	7	5	1	0	0	0	0	0	0	0	0	27241	7344	288	34	26	9	8	9	0	0	0	0	0	0	0	0	0	24370	10255	220	31	16	5	4	10	0	0
	A	71	0	0	0	27862	242	163	113	1417	46	6	1	2	0	0	0	0	0	0	0	0	31964	324	203	143	2259	50	13	0	3	0	0	0	0	0	0	0	0	33105	233	168	74	1291	32	6	0	2	0
	C	72	0	0	0	29463	361	19	3	2	3	0	0	0	1	0	0	0	0	0	0	0	34493	406	44	12	0	4	0	0	0	0	0	0	0	0	0	0	0	34488	386	33	3	0	1	0	0	0	0
	C	73	0	0	0	29729	100	20	3	0	0	0	0	0	0	0	0	0	0	0	0	0	34754	174	26	4	1	0	0	0	0	0	0	0	0	0	0	0	0	34765	126	10	6	2	2	0	0	0	0
	G	74	0	0	0	29685	52	113	2	0	0	0	0	0	0	0	0	0	0	0	0	0	34776	60	112	8	3	0	0	0	0	0	0	0	0	0	0	0	0	34728	36	139	7	1	0	0	0	0	0
	A	75	0	0	0	29064	316	161	61	22	221	7	0	0	0	0	0	0	0	0	0	0	33926	381	229	115	26	265	15	0	2	0	0	0	0	0	0	0	0	34076	330	167	79	22	229	4	2	2	0
	C	76	0	0	0	29220	328	65	204	32	2	1	0	0	0	0	0	0	0	0	0	0	34175	412	100	235	28	3	0	5	0	1	0	0	0	0	0	0	0	34227	353	88	222	18	2	0	0	1	0
	G	77	0	0	0	29766	60	18	7	0	0	0	1	0	0	0	0	0	0	0	0	0	34843	92	13	10	0	0	1	0	0	0	0	0	0	0	0	0	0	34800	92	8	10	1	0	0	0	0	0
ES48i	G	78	0	1	1	24044	5318	171	290	16	12	0	0	1	0	0	0	0	0	0	0	0	27108	7127	267	392	28	29	2	1	0	3	0	2	0	0	0	0	0	24360	10058	185	279	19	6	3	1	0	0
ES47i	A	79	0	1	1	23574	5067	623	523	13	34	4	8	0	0	0	2	1	3	0	0	0	26771	6672	888	534	23	49	5	3	1	1	0	4	5	3	0	0	0	23922	9711	656	553	19	33	3	7	1	2
ES46i	G	80	0	2	2	23361	1554	4706	145	13	6	4	40	5	18	0	0	0	0	0	0	0	26005	2414	6198	220	19	19	1	54	5	20	1	0	1	1	0	1	0	23756	1532	9379	144	22	14	5	42	4	11
ES45i	A	81	0	1	1	24268	5274	178	76	18	24	1	3	10	0	0	0	0	0	0	0	0	27633	6945	215	99	29	21	1	3	12	0	0	0	1	0	0	0	0	24563	9967	225	87	26	29	4	4	6	0
ES44i	G	82	0	1	1	20003	9017	401	234	24	55	117	0	0	0	0	1	0	0	0	0	0	21038	12783	615	329	26	81	80	2	0	1	0	2	2	0	0	0	0	20452	13446	526	264	38	52	130	0	0	2
	C	83	0	0	0	29053	548	116	122	12	0	0	0	1	0	0	0	0	0	0	0	0	33943	623	179	195	14	3	1	0	0	0	0	0	0	1	0	0	0	34040	600	129	133	5	1	1	2	0	0
ES43d	C	84	2	0	-2	10745	591	18481	31	2	0	0	0	0	1	0	0	0	1	0	0	0	15362	719	18839	38	1	0	0	0	0	0	0	0	0	0	0	0	0	15568	631	18681	25	6	0	0	0	0	0
ES42d	G	85	4	0	-4	11740	424	64	92	17519	8	1	4	0	0	0	0	0	0	0	0	0	17001	438	108	122	17277	12	0	1	0	0	0	0	0	0	0	0	0	16673	452	93	99	17578	12	2	2	0	0
ES41i	A	86	0	1	1	20381	8387	906	66	90	15	6	0	0	1	0	0	0	0	0	0	0	21572	11729	1366	100	164	19	7	1	0	1	0	0	0	0	0	0	0	21037	12593	1044	85	123	13	12	2	2	0
ES40i	A	87	0	4	4	19767	715	882	449	7985	49	3	1	0	0	0	0	0	1	0	0	0	20545	1048	1234	779	11272	72	8	0	1	0	0	0	0	0	0	0	0	20401	896	972	553	12030	51	7	1	0	0
ES39i	A	88	1	3	2	1861	18890	439	8398	208	38	15	0	3	0	0	0	0	0	0	0	0	2817	19299	542	11952	279	36	17	4	7	1	1	0	1	2	1	0	0	2363	19261	529	12485	224	36	12	1	0	0
ES38i	A	89	0	1	1	17998	9192	1551	813	123	101	13	53	7	0	0	0	1	0	0	0	0	17910	13184	2115	1283	209	131	21	96	9	1	0	0	0	0	0	0	0	18204	13584	1801	981	142	123	30	45	0	1
ES37i	A	90	0	1	1	18983	8851	875	305	188	224	85	79	255	6	1	0	0	0	0	0	0	19262	12704	1321	489	340	273	124	121	321	4	0	0	0	0	0	0	0	19348	13224	1014	363	274	256	85	95	248	4
	A	91	0	0	0	25884	887	2061	557	236	74	140	4	4	5	0	0	0	0	0	0	0	29447	1353	2666	835	314	87	251	3	3	0	0	0	0	0	0	0	0	30210	1176	2388	669	246	76	135	1	10	0
ES36i	G	92	0	4	4	18196	2182	549	1330	7384	149	26	6	9	5	15	1	0	0	0	0	0	17996	3021	785	1974	10884	215	46	7	14	9	7	0	1	0	0	0	0	18330	2662	699	1575	11427	161	44	2	4	2
ES35i	G	93	0	3	3	19772	1379	639	7554	364	126	10	4	3	0	1	0	0	0	0	0	0	20157	2046	936	11087	565	134	13	14	4	0	1	1	1	0	0	0	0	20313	1604	804	11685	400	95	6	1	2	0
	G	94	0	0	0	26867	1895	287	418	273	63	24	20	2	2	0	0	1	0	0	0	0	30519	2769	410	634	479	79	33	29	6	1	0	0	0	0	0	0	0	31398	2143	342	558	344	67	19	37	1	2
	A	95	0	0	0	26440	1597	1003	335	98	37	27	96	23	167	21	6	0	2	0	0	0	29847	2421	1650	429	100	49	45	89	36	263	27	2	1	0	0	0	0	30903	1942	1219	349	103	64	40	68	37	161
ES34i	G	96	0	1	1	19742	8318	1112	481	42	52	29	17	13	39	4	1	2	0	0	0	0	20276	11926	1682	776	90	47	45	20	17	70	2	3	5	0	0	0	0	20221	12619	1273	586	64	51	37	9	8	36
ES33i	G	97	0	2	2	16313	850	9455	2111	729	123	179	78	10	0	1	1	1	1	0	0	0	14359	1121	15109	2666	1132	194	266	106	4	1	1	0	0	0	0	0	0	15740	1095	14301	2547	817	140	198	66	3	4
	C	98	0	0	0	25866	2687	208	1043	42	4	0	1	1	0	0	0	0	0	0	0	0	27904	4826	250	1908	64	2	1	3	1	0	0	0	0	0	0	0	0	29722	3560	292	1264	56	11	2	3	1	0
	G	99	0	0	0	26930	1047	43	1815	16	0	1	0	0	0	0	0	0	0	0	0	0	29228	1821	50	3828	28	4	0	0	0	0	0	0	0	0	0	0	0	31166	1292	87	2327	29	4	4	1	0	1
ES32i	G	100	0	2	2	15564	3843	9842	147	257	27	14	7	137	13	0	1	0	0	0	0	0	13259	6935	14132	184	178	34	25	5	186	18	1	2	0	0	0	0	0	14831	5032	14102	269	389	46	29	23	174	15
ES31i	G	101	0	8	8	15426	3222	1242	108	247	45	130	220	8988	215	6	2	1	0	0	0	0	13131	6230	1213	107	238	58	114	276	13363	218	10	1	0	0	0	0	0	14738	4206	1760	157	398	112	131	277	12861	257
ES30i	G	102	0	2	2	15646	218	12862	574	509	32	8	0	3	0	0	0	0	0	0	0	0	13386	220	20223	661	437	20	3	5	2	0	0	2	0	0	0	0	0	14911	362	17967	820	793	40	7	8	3	0
ES29i	A	103	0	4	4	18140	924	311	309	10103	28	35	1	1	0	0	0	0	0	0	0	0	18797	651	368	364	14693	41	40	1	2	1	1	0	0	0	0	0	0	17946	1445	555	501	14377	38	44	3	2	0
ES28i	G	104	0	2	2	15983	3195	10080	506	23	21	7	28	5	1	3	0	0	0	0	0	0	13508	6184	14532	650	26	17	7	26	6	2	1	0	0	0	0	0	0	15548	4039	14519	685	28	31	1	46	13	0
	G	105	0	0	0	25782	945	177	2842	37	52	6	11	0	0	0	0	0	0	0	0	0	27624	1237	196	5787	43	53	4	14	1	0	0	0	0	0	0	0	0	29648	1434	272	3424	55	56	7	14	0	1
ES27i	A	106	0	3	3	17596	492	455	10772	46	475	8	2	5	0	0	1	0	0	0	0	0	18307	568	471	14911	80	605	11	0	5	0	1	0	0	0	0	0	0	16855	682	830	15785	82	654	16	2	5	0
	G	107	0	0	0	25130	3502	965	140	49	37	6	4	5	14	0	0	0	0	0	0	0	26798	6578	1272	157	53	55	7	6	1	31	1	0	0	0	0	0	0	29118	4311	1163	182	57	41	6	2	7	21
ES26i	A	108	0	2	2	16882	1464	11287	135	50	12	7	12	3	0	0	0	0	0	0	0	0	17247	1954	15492	144	94	7	5	15	1	0	0	0	0	0	0	0	0	16159	1873	16596	172	66	11	16	17	1	0
ES25i	G	109	0	1	1	13635	14532	957	581	73	22	8	8	35	1	0	0	0	0	0	0	0	11146	21760	1177	680	93	30	8	9	55	1	0	0	0	0	0	0	0	12257	20369	1225	833	132	36	6	13	38	1
ES24d	C	110	3	1	-2	2018	15270	293	12209	23	32	5	1	0	1	0	0	0	0	0	0	0	2427	22703	300	9448	29	44	6	1	0	1	0	0	0	0	0	0	0	2862	21496	389	10082	41	35	4	1	0	0
	A	111	0	0	0	29653	133	49	17	0	0	0	0	0	0	0	0	0	0	0	0	0	34688	172	73	21	3	2	0	0	0	0	0	0	0	0	0	0	0	34573	214	85	36	1	2	0	0	0	0
ES23i	A	112	0	2	2	13670	1487	14426	135	81	29	15	6	2	1	0	0	0	0	0	0	0	11291	1831	21466	201	106	27	13	19	4	1	0	0	0	0	0	0	0	11786	2264	20390	245	138	54	20	11	3	0
Es22i	A	113	0	3	3	13541	1489	544	13794	353	86	20	14	0	1	1	3	3	3	0	0	0	10819	1819	692	20866	570	130	35	19	2	0	2	1	3	1	0	0	0	11878	2111	846	19309	532	154	43	28	4	0
Es21i	A	114	0	2	2	12225	987	14875	983	144	109	259	29	220	5	3	4	9	0	0	0	0	9398	1344	22201	1170	208	132	257	29	194	5	2	8	11	0	0	0	0	10249	1632	20817	1189	218	158	325	21	275	13
ES20i	A	115	0	1	1	11958	14705	1425	896	543	160	64	87	6	2	2	0	2	0	2	0	0	9156	21948	1800	1047	560	217	84	121	15	2	0	2	6	0	0	1	0	9712	20718	1814	1310	827	240	148	114	14	2
	G	116	0	0	0	25202	1670	1123	525	434	371	61	237	146	18	1	19	39	4	2	0	0	29272	2077	1422	713	514	373	64	242	163	27	0	26	57	8	1	0	0	28086	2356	1833	840	638	459	107	276	210	23
	A	117	0	0	0	26058	1491	393	641	347	188	166	55	35	55	47	74	241	49	11	0	1	30486	1763	485	871	454	210	190	46	31	31	27	85	230	48	2	0	0	29092	2273	773	999	536	379	214	117	73	64
ES19d	G	118	3	0	-3	15484	1971	510	11153	113	285	261	14	6	9	12	10	22	2	0	0	0	22816	2337	547	8224	136	436	393	10	8	12	4	8	23	4	1	0	0	21657	3082	848	8340	178	367	338	17	16	21
	G	119	0	0	0	25582	2147	474	1100	307	209	7	9	12	5	0	0	0	0	0	0	0	29853	2354	517	1459	389	331	13	10	29	4	0	0	0	0	0	0	0	28274	3365	771	1640	486	331	9	12	18	5
	G	120	0	0	0	25674	1470	733	1426	110	414	9	14	0	1	0	1	0	0	0	0	0	30082	1668	1001	1502	99	573	9	22	1	2	0	0	0	0	0	0	0	28598	2243	1224	2030	166	611	11	17	0	9
	G	121	1	1	0	1512	24836	1412	641	269	1107	47	21	3	0	0	2	1	1	0	0	0	1654	29155	1800	777	395	1094	62	20	1	1	0	0	0	0	0	0	0	2289	27066	2362	977	512	1595	70	32	5	3
	G	122	0	0	0	25092	3091	840	432	99	265	24	9	0	0	0	0	0	0	0	0	0	29497	3404	1014	616	97	276	27	27	0	0	1	0	0	0	0	0	0	27705	4495	1286	737	166	462	34	21	1	4
ES18i	G	123	0	1	1	11435	17357	266	360	60	57	72	240	2	1	2	0	0	0	0	0	0	8591	25058	280	403	49	111	125	335	5	1	1	0	0	0	0	0	0	8602	24510	426	611	84	126	160	379	10	3
	G	124	0	0	0	25346	3549	138	175	374	41	32	190	4	3	0	0	0	0	0	0	0	29881	3998	138	164	437	51	31	256	2	1	0	0	0	0	0	0	0	28156	5383	231	247	537	68	29	251	8	1
ES17i	G	125	0	4	4	11717	344	3178	309	14047	121	129	0	7	0	0	0	0	0	0	0	0	9001	340	3877	289	21083	183	172	4	10	0	0	0	0	0	0	0	0	9313	624	4747	375	19502	178	163	0	6	2
ES16i	G	126	0	2	2	10316	637	18852	33	4	1	5	4	0	0	0	0	0	0	0	0	0	7495	665	26764	28	1	4	1	1	0	0	0	0	0	0	0	0	0	7082	918	26852	46	2	2	5	4	0	0
	A	127	0	0	0	24414	1940	2087	1186	12	199	9	1	1	0	0	1	2	0	0	0	0	28707	2139	2312	1515	8	258	11	3	0	0	3	0	3	0	0	0	0	26664	2852	3207	1892	13	253	18	6	1	0
ES15i	A	128	0	3	3	9824	3006	140	16830	11	19	21	1	0	0	0	0	0	0	0	0	0	7132	3561	127	24102	12	9	16	0	0	0	0	0	0	0	0	0	0	6525	4542	224	23566	19	14	20	0	0	0
	C	129	0	0	0	27266	2214	168	173	21	5	2	0	0	0	3	0	0	0	0	0	0	33112	1475	123	210	30	3	1	1	0	1	3	0	0	0	0	0	0	33016	1521	161	158	42	2	6	3	0	0
	C	130	0	0	0	29175	487	82	10	96	2	0	0	0	0	0	0	0	0	0	0	0	34116	611	86	25	120	1	0	0	0	0	0	0	0	0	0	0	0	33832	735	168	31	140	4	0	0	0	1
	C	131	0	0	0	29532	214	84	17	3	1	1	0	0	0	0	0	0	0	0	0	0	34589	257	97	6	10	0	0	0	0	0	0	0	0	0	0	0	0	34440	337	102	21	10	1	0	0	0	0
ES14d	G	132	3	0	-3	20408	2427	249	6738	6	21	0	1	0	1	1	0	0	0	0	0	0	26693	2168	177	5895	9	15	1	0	1	0	0	0	0	0	0	0	0	26364	2205	240	6067	6	19	3	5	2	0
ES13d	G	133	4	0	-4	19504	946	1418	370	7592	11	6	2	1	0	2	0	0	0	0	0	0	24999	1009	1467	292	7180	5	1	3	3	0	0	0	0	0	0	0	0	23753	985	2157	340	7648	13	10	3	2	0
ES12i	G	134	0	1	1	9270	15532	240	4783	11	14	2	0	0	0	0	0	0	0	0	0	0	7705	21402	170	5664	3	14	0	0	1	0	0	0	0	0	0	0	0	7410	20186	336	6948	18	12	0	0	1	0
ES11d	A	135	2	1	-1	617	19412	4323	453	4995	8	38	6	0	0	0	0	0	0	0	0	0	511	24722	3402	400	5893	6	25	0	0	0	0	0	0	0	0	0	0	673	23553	2775	506	7344	5	46	7	2	0
	A	136	0	0	0	19829	9815	68	83	10	7	6	2	2	1	25	4	0	0	0	0	0	24716	10105	47	58	8	4	6	0	1	5	9	0	0	0	0	0	0	22928	11760	51	85	11	4	7	4	3	10
	A	137	0	0	0	23912	755	5137	33	8	1	4	2	0	0	0	0	0	0	0	0	0	28343	556	6016	33	2	1	5	3	0	0	0	0	0	0	0	0	0	26489	879	7483	37	8	4	3	6	2	0
	G	138	0	0	0	24415	223	5153	10	49	1	1	0	0	0	0	0	0	0	0	0	0	28744	137	6047	4	26	1	0	0	0	0	0	0	0	0	0	0	0	27049	259	7535	11	50	6	0	0	0	1
ES10i	A	139	0	1	1	8667	21112	36	25	11	0	1	0	0	0	0	0	0	0	0	0	0	7239	27657	35	24	4	0	0	0	0	0	0	0	0	0	0	0	0	6494	28326	42	33	11	1	0	4	0	0
ES9i	A	140	0	2	2	4224	4825	20772	20	4	1	2	1	0	0	0	0	2	1	0	0	0	3451	4106	27382	13	4	1	0	0	0	0	1	0	0	1	0	0	0	2519	4373	27975	27	7	4	0	0	1	1
ES8i	A	141	0	1	1	8673	15589	4249	1210	126	4	0	1	0	0	0	0	0	0	0	0	0	8818	21300	3768	981	89	1	2	0	0	0	0	0	0	0	0	0	0	10079	20457	3648	574	152	0	0	1	0	0
	C	142	0	0	0	19176	804	9805	25	38	1	3	0	0	0	0	0	0	0	0	0	0	24242	606	10056	19	30	1	5	0	0	0	0	0	0	0	0	0	0	22608	827	11425	24	22	2	3	0	0	0
	A	143	0	0	0	29826	18	8	0	0	0	0	0	0	0	0	0	0	0	0	0	0	34921	32	5	0	1	0	0	0	0	0	0	0	0	0	0	0	0	34890	17	4	0	0	0	0	0	0	0
ES7d	C	144	1	0	-1	27657	2177	13	0	5	0	0	0	0	0	0	0	0	0	0	0	0	33077	1869	8	2	3	0	0	0	0	0	0	0	0	0	0	0	0	33500	1397	8	1	5	0	0	0	0	0
	G	145	0	0	0	29758	75	19	0	0	0	0	0	0	0	0	0	0	0	0	0	0	34897	56	6	0	0	0	0	0	0	0	0	0	0	0	0	0	0	34837	64	9	0	1	0	0	0	0	0
ES6d	A	146	3	1	-2	5177	20946	2004	1670	53	0	2	0	0	0	0	0	0	0	0	0	0	6045	25817	1518	1545	34	0	0	0	0	0	0	0	0	0	0	0	0	7664	24943	1263	1003	36	0	1	1	0	0
ES5i	G	147	0	2	2	3481	100	26256	9	1	0	0	0	5	0	0	0	0	0	0	0	0	2853	72	32030	3	1	0	0	0	0	0	0	0	0	0	0	0	0	2039	126	32734	6	3	0	0	0	3	0
ES4i	A	148	0	1	1	3368	26465	16	2	0	0	0	0	1	0	0	0	0	0	0	0	0	2802	32146	8	3	0	0	0	0	0	0	0	0	0	0	0	0	0	1971	32927	11	1	0	1	0	0	0	0
	A	149	0	0	0	29830	9	8	4	0	1	0	0	0	0	0	0	0	0	0	0	0	34950	4	4	0	0	0	1	0	0	0	0	0	0	0	0	0	0	34892	8	6	4	0	1	0	0	0	0
	G	150	0	0	0	29831	8	5	4	4	0	0	0	0	0	0	0	0	0	0	0	0	34943	6	6	4	0	0	0	0	0	0	0	0	0	0	0	0	0	34895	3	7	3	2	1	0	0	0	0
ES3i	A	151	0	2	2	1262	20	28568	1	1	0	0	0	0	0	0	0	0	0	0	0	0	1311	16	33629	3	0	0	0	0	0	0	0	0	0	0	0	0	0	707	29	34170	4	1	0	0	0	0	0
	G	152	0	0	0
	A	153	0	0	0
ES2d	A	154	4	3	-1
	G	155	0	0	0
	A	156	0	0	0
ES1i	A	157	0	1	1
	A	158	1	1	0
	A	159	0	0	0
	G	160	0	0	0
	A	161	0	0	0
	A	162	1	1	0
3' end	G	163	1	1	0
Total
[truncated: 7 more columns]

## Sheet: RPS12_H2RNAi RESC6-IP 0-4Day R1
RPS12_KREH2-RNAi_RESC6-IP_0-4 Day_R1
						J25 - H2 RNAi 0Day RESC6 IP																	J26 - H2 RNAi 3Day RESC6 IP																	J27 - H2 RNAi 4Day RESC6 IP
			no of Ts present before that position			# reads with indicated # Ts present before that position																	# reads with indicated # Ts present before that position																	# reads with indicated # Ts present before that position
	sequence	T-stripped	pre-edited	edited	editing events; del = -; ins = +	0	1	2	3	4	5	6	7	8	9	10	11	12	13	14	15	16	0	1	2	3	4	5	6	7	8	9	10	11	12	13	14	15	16	0	1	2	3	4	5	6	7	8	9
	C	1
5' end	A	2
	A	3
	A	4
	C	5
	A	6
	C	7
	G	8
	A	9
	A	10
	A	11
	C	12
	A	13
	A	14
	A	15
	C	16	0	0	0	36461	0	0	0	0	0	0	0	0	0	0	0	0	0	0	0	0	26010	0	0	0	0	0	0	0	0	0	0	0	0	0	0	0	0	21759	0	0	0	0	0	0	0	0	0
	A	17	1	1	0	293	36164	4	0	0	0	0	0	0	0	0	0	0	0	0	0	0	290	25720	0	0	0	0	0	0	0	0	0	0	0	0	0	0	0	184	21575	0	0	0	0	0	0	0	0
	A	18	0	0	0	36400	25	6	26	4	0	0	0	0	0	0	0	0	0	0	0	0	25990	13	2	5	0	0	0	0	0	0	0	0	0	0	0	0	0	21742	11	5	1	0	0	0	0	0	0
	A	19	0	0	0	36325	78	52	6	0	0	0	0	0	0	0	0	0	0	0	0	0	25916	51	40	3	0	0	0	0	0	0	0	0	0	0	0	0	0	21695	35	28	1	0	0	0	0	0	0
	G	20	0	0	0	36274	86	86	12	0	0	3	0	0	0	0	0	0	0	0	0	0	25955	27	23	3	1	0	1	0	0	0	0	0	0	0	0	0	0	21730	18	10	1	0	0	0	0	0	0
	A	21	1	1	0	6151	30039	213	37	10	0	5	0	0	5	1	0	0	0	0	0	0	3392	22524	86	6	1	0	1	0	0	0	0	0	0	0	0	0	0	2013	19704	36	3	0	0	2	0	0	1
	A	22	0	0	0	31225	1517	3602	76	24	4	13	0	0	0	0	0	0	0	0	0	0	23625	761	1594	21	0	2	7	0	0	0	0	0	0	0	0	0	0	20370	482	891	11	3	1	1	0	0	0
ES76i	A	23	0	1	1	32519	3348	433	119	22	6	7	7	0	0	0	0	0	0	0	0	0	23855	1906	208	33	5	0	3	0	0	0	0	0	0	0	0	0	0	20517	1105	118	9	9	0	0	1	0	0
	A	24	0	0	0	33698	2048	158	346	57	34	44	8	68	0	0	0	0	0	0	0	0	24869	880	50	166	10	9	12	0	14	0	0	0	0	0	0	0	0	21114	486	41	98	5	6	3	0	6	0
	A	25	0	0	0	30916	1693	202	338	2777	459	43	6	4	20	2	1	0	0	0	0	0	23575	746	50	118	1305	197	10	3	0	6	0	0	0	0	0	0	0	20383	408	34	89	731	100	7	1	1	5
ES75i	G	26	0	4	4	28311	524	3230	212	2461	1664	51	5	2	1	0	0	0	0	0	0	0	22048	248	1499	78	1410	715	11	0	1	0	0	0	0	0	0	0	0	19442	145	896	45	838	388	5	0	0	0
ES74i	G	27	0	8	8	27987	351	209	136	48	2906	139	199	4151	87	24	40	120	44	16	2	0	21864	265	84	71	25	1307	65	79	2057	58	9	19	78	22	7	0	0	19346	190	47	37	10	753	26	47	1186	25
	C	28	0	0	0	35870	389	126	50	15	2	7	2	0	0	0	0	0	0	0	0	0	25738	215	31	14	7	0	4	1	0	0	0	0	0	0	0	0	0	21567	166	15	9	1	0	1	0	0	0
	G	29	0	0	0	36313	87	42	15	4	0	0	0	0	0	0	0	0	0	0	0	0	25975	22	8	4	0	0	1	0	0	0	0	0	0	0	0	0	0	21730	15	10	3	0	1	0	0	0	0
ES73i	A	30	0	1	1	28125	7951	117	127	84	12	37	4	3	0	0	0	0	1	0	0	0	22091	3819	31	39	18	2	8	0	1	0	0	0	1	0	0	0	0	19516	2184	22	21	11	0	4	0	1	0
ES72i	G	31	0	1	1	27891	8054	258	135	61	12	3	0	3	1	9	27	4	3	0	0	0	21940	3909	100	37	12	1	1	0	0	1	4	5	0	0	0	0	0	19393	2255	59	25	20	2	1	0	0	0
ES71i	G	32	0	1	1	28064	7862	265	142	70	28	20	1	5	3	0	0	1	0	0	0	0	22055	3733	75	117	15	8	5	2	0	0	0	0	0	0	0	0	0	19442	2120	50	117	15	4	5	1	4	0
	A	33	0	0	0	35404	518	252	193	30	26	35	0	3	0	0	0	0	0	0	0	0	25409	365	158	53	12	6	5	0	2	0	0	0	0	0	0	0	0	21298	267	134	46	7	4	3	0	0	0
ES70d	G	34	6	5	-1	240	603	516	193	145	7433	27285	39	7	0	0	0	0	0	0	0	0	114	300	335	96	82	3596	21466	18	3	0	0	0	0	0	0	0	0	84	279	243	60	66	2029	18979	17	2	0
ES69i	A	35	0	1	1	27809	8340	84	70	59	23	54	7	14	0	1	0	0	0	0	0	0	21808	4113	27	15	17	8	10	0	12	0	0	0	0	0	0	0	0	19267	2432	12	14	11	3	15	1	4	0
ES68i	G	36	0	1	1	27836	8251	140	115	60	36	16	0	1	2	2	2	0	0	0	0	0	21817	4075	39	51	17	5	3	0	2	0	0	1	0	0	0	0	0	19284	2392	27	29	9	8	8	1	1	0
ES67d	G	37	1	0	-1	8342	27621	113	245	22	26	83	2	0	0	6	1	0	0	0	0	0	4222	21591	40	110	7	6	32	0	0	2	0	0	0	0	0	0	0	2514	19068	25	108	10	7	25	0	0	0
ES66i	G	38	0	2	2	27798	144	8257	60	39	9	14	15	117	1	1	2	4	0	0	0	0	21748	73	4056	27	15	4	5	6	75	0	0	1	0	0	0	0	0	19205	60	2366	20	10	6	2	6	81	2
ES65i	G	39	0	2	2	27587	506	8159	100	34	67	0	6	2	0	0	0	0	0	0	0	0	21625	290	4035	32	4	23	0	1	0	0	0	0	0	0	0	0	0	19082	267	2349	25	2	34	0	0	0	0
ES64i	A	40	0	3	3	27644	318	335	8021	26	11	84	22	0	0	0	0	0	0	0	0	0	21766	125	108	3961	13	0	30	7	0	0	0	0	0	0	0	0	0	19258	145	78	2246	11	4	13	4	0	0
	C	41	0	0	0	35736	422	207	75	19	2	0	0	0	0	0	0	0	0	0	0	0	25655	219	114	17	4	1	0	0	0	0	0	0	0	0	0	0	0	21499	149	76	29	6	0	0	0	0	0
ES63d	G	42	1	0	-1	9490	26918	33	10	2	7	1	0	0	0	0	0	0	0	0	0	0	5614	20384	8	1	3	0	0	0	0	0	0	0	0	0	0	0	0	3970	17787	1	0	0	1	0	0	0	0
ES62i	G	43	0	4	4	27551	336	232	289	7978	59	4	11	1	0	0	0	0	0	0	0	0	21956	164	89	95	3684	18	0	2	2	0	0	0	0	0	0	0	0	19519	113	79	90	1953	4	0	1	0	0
ES61i	A	44	0	4	4	27455	509	257	294	7934	8	0	3	1	0	0	0	0	0	0	0	0	21657	338	199	151	3660	4	1	0	0	0	0	0	0	0	0	0	0	19228	272	195	127	1933	4	0	0	0	0
ES60i	G	45	0	3	3	26690	628	195	8647	268	33	0	0	0	0	0	0	0	0	0	0	0	20421	614	92	4758	117	7	1	0	0	0	0	0	0	0	0	0	0	17899	500	70	3136	143	6	5	0	0	0
ES59i	A	46	0	4	4	26659	30	85	1624	8054	6	1	1	1	0	0	0	0	0	0	0	0	20416	22	32	1696	3840	4	0	0	0	0	0	0	0	0	0	0	0	17927	43	35	1621	2126	4	2	0	1	0
ES58i	G	47	0	1	1	26587	8083	55	53	1674	1	7	1	0	0	0	0	0	0	0	0	0	20427	3864	39	45	1635	0	0	0	0	0	0	0	0	0	0	0	0	17948	2158	48	61	1538	3	3	0	0	0
ES57i	A	48	0	2	2	26594	801	8101	24	933	4	1	0	0	3	0	0	0	0	0	0	0	20505	636	3854	26	989	0	0	0	0	0	0	0	0	0	0	0	0	18102	465	2132	41	1017	1	1	0	0	0
ES56i	A	49	0	2	2	26548	47	9832	21	8	2	3	0	0	0	0	0	0	0	0	0	0	20586	64	5346	9	5	0	0	0	0	0	0	0	0	0	0	0	0	18230	64	3457	5	1	1	1	0	0	0
ES55i	A	50	0	1	1	26564	9107	778	11	1	0	0	0	0	0	0	0	0	0	0	0	0	20650	4777	573	8	1	1	0	0	0	0	0	0	0	0	0	0	0	18299	3033	416	10	1	0	0	0	0	0
ES54i	G	51	0	1	1	26662	9464	284	12	34	5	0	0	0	0	0	0	0	0	0	0	0	20508	5315	160	6	18	1	1	1	0	0	0	0	0	0	0	0	0	18012	3630	102	2	12	1	0	0	0	0
	A	52	0	0	0	35485	137	783	6	4	42	3	0	1	0	0	0	0	0	0	0	0	25316	122	547	3	0	22	0	0	0	0	0	0	0	0	0	0	0	21259	102	383	1	0	14	0	0	0	0
	G	53	0	0	0	36335	61	60	3	1	1	0	0	0	0	0	0	0	0	0	0	0	25959	19	27	2	0	3	0	0	0	0	0	0	0	0	0	0	0	21728	5	24	1	0	1	0	0	0	0
ES53i	C	54	0	1	1	28838	7615	3	1	4	0	0	0	0	0	0	0	0	0	0	0	0	22621	3376	6	4	3	0	0	0	0	0	0	0	0	0	0	0	0	19875	1878	4	1	1	0	0	0	0	0
	C	55	0	0	0	36438	17	6	0	0	0	0	0	0	0	0	0	0	0	0	0	0	25992	8	10	0	0	0	0	0	0	0	0	0	0	0	0	0	0	21743	7	8	1	0	0	0	0	0	0
	G	56	0	0	0	34560	1897	4	0	0	0	0	0	0	0	0	0	0	0	0	0	0	24554	1456	0	0	0	0	0	0	0	0	0	0	0	0	0	0	0	20651	1108	0	0	0	0	0	0	0	0
ES52d	C	57	2	0	-2	10075	133	26244	7	2	0	0	0	0	0	0	0	0	0	0	0	0	5901	94	20014	1	0	0	0	0	0	0	0	0	0	0	0	0	0	4109	86	17562	1	0	1	0	0	0	0
	G	58	0	0	0	36407	51	3	0	0	0	0	0	0	0	0	0	0	0	0	0	0	25988	20	2	0	0	0	0	0	0	0	0	0	0	0	0	0	0	21752	5	2	0	0	0	0	0	0	0
	A	59	0	0	0	36287	72	27	60	1	10	1	3	0	0	0	0	0	0	0	0	0	25904	64	15	20	1	3	1	0	2	0	0	0	0	0	0	0	0	21681	70	4	4	0	0	0	0	0	0
ES51i	G	60	0	2	2	26348	391	9633	84	1	0	1	3	0	0	0	0	0	0	0	0	0	20084	368	5531	24	0	0	3	0	0	0	0	0	0	0	0	0	0	17632	266	3854	5	0	0	1	1	0	0
	C	61	0	0	0	36313	113	16	16	0	3	0	0	0	0	0	0	0	0	0	0	0	25914	84	6	5	0	0	1	0	0	0	0	0	0	0	0	0	0	21671	82	1	4	0	0	1	0	0	0
	C	62	0	0	0	36457	3	0	1	0	0	0	0	0	0	0	0	0	0	0	0	0	26009	1	0	0	0	0	0	0	0	0	0	0	0	0	0	0	0	21757	1	0	1	0	0	0	0	0	0
	C	63	0	0	0	36365	91	3	0	2	0	0	0	0	0	0	0	0	0	0	0	0	25933	76	1	0	0	0	0	0	0	0	0	0	0	0	0	0	0	21679	80	0	0	0	0	0	0	0	0
	A	64	0	0	0	36281	170	9	1	0	0	0	0	0	0	0	0	0	0	0	0	0	25888	118	3	1	0	0	0	0	0	0	0	0	0	0	0	0	0	21664	90	3	2	0	0	0	0	0	0
	G	65	0	0	0	36069	119	162	99	1	5	1	1	4	0	0	0	0	0	0	0	0	25752	60	139	53	1	0	0	0	5	0	0	0	0	0	0	0	0	21610	25	85	37	0	1	0	0	1	0
ES50i	C	66	0	2	2	28157	120	8123	37	8	15	0	0	0	1	0	0	0	0	0	0	0	21572	74	4344	10	2	7	0	0	0	1	0	0	0	0	0	0	0	18811	40	2902	2	2	2	0	0	0	0
	C	67	0	0	0	34549	1884	28	0	0	0	0	0	0	0	0	0	0	0	0	0	0	24498	1491	20	1	0	0	0	0	0	0	0	0	0	0	0	0	0	20563	1191	5	0	0	0	0	0	0	0
	G	68	0	0	0	34572	1821	35	30	3	0	0	0	0	0	0	0	0	0	0	0	0	24476	1489	19	26	0	0	0	0	0	0	0	0	0	0	0	0	0	20545	1189	15	10	0	0	0	0	0	0
	G	69	0	0	0	34337	301	1671	52	32	66	2	0	0	0	0	0	0	0	0	0	0	24377	172	1419	13	5	24	0	0	0	0	0	0	0	0	0	0	0	20756	90	879	11	3	20	0	0	0	0
ES49i	A	70	0	1	1	25541	10561	285	40	17	7	2	8	0	0	0	0	0	0	0	0	0	19624	6294	68	9	6	7	0	2	0	0	0	0	0	0	0	0	0	17323	4396	30	2	3	3	0	2	0	0
	A	71	0	0	0	34483	278	185	115	1349	37	7	1	6	0	0	0	0	0	0	0	0	24488	110	102	67	1229	13	1	0	0	0	0	0	0	0	0	0	0	20846	63	55	22	760	8	4	0	1	0
	C	72	0	0	0	35965	454	31	5	4	2	0	0	0	0	0	0	0	0	0	0	0	25731	262	12	5	0	0	0	0	0	0	0	0	0	0	0	0	0	21594	153	10	2	0	0	0	0	0	0
	C	73	0	0	0	36273	165	18	4	0	0	1	0	0	0	0	0	0	0	0	0	0	25966	40	4	0	0	0	0	0	0	0	0	0	0	0	0	0	0	21726	31	2	0	0	0	0	0	0	0
	G	74	0	0	0	36272	38	143	4	3	1	0	0	0	0	0	0	0	0	0	0	0	25795	32	179	1	3	0	0	0	0	0	0	0	0	0	0	0	0	21606	29	119	3	2	0	0	0	0	0
	A	75	0	0	0	35533	343	209	97	26	245	7	0	1	0	0	0	0	0	0	0	0	25529	150	67	32	11	218	3	0	0	0	0	0	0	0	0	0	0	21448	92	47	15	11	146	0	0	0	0
	C	76	0	0	0	35708	406	100	223	22	0	0	2	0	0	0	0	0	0	0	0	0	25735	157	42	70	6	0	0	0	0	0	0	0	0	0	0	0	0	21610	96	18	31	3	0	1	0	0	0
	G	77	0	0	0	36374	64	10	13	0	0	0	0	0	0	0	0	0	0	0	0	0	25969	38	3	0	0	0	0	0	0	0	0	0	0	0	0	0	0	21740	16	2	1	0	0	0	0	0	0
ES48i	G	78	0	1	1	25556	10365	192	300	33	9	2	4	0	0	0	0	0	0	0	0	0	19795	5980	83	143	7	0	2	0	0	0	0	0	0	0	0	0	0	17493	4108	56	98	2	1	1	0	0	0
ES47i	A	79	0	1	1	25069	10024	674	628	19	32	5	7	0	1	0	2	0	0	0	0	0	19416	5882	376	315	6	7	0	7	1	0	0	0	0	0	0	0	0	17331	4056	174	189	1	6	0	2	0	0
ES46i	G	80	0	2	2	24868	1696	9646	162	19	15	5	33	2	13	2	0	0	0	0	0	0	18303	1989	5667	30	4	5	1	7	1	2	0	0	0	1	0	0	0	16544	1246	3946	19	1	2	0	1	0	0
ES45i	A	81	0	1	1	25782	10295	217	106	23	22	3	0	13	0	0	0	0	0	0	0	0	19815	6067	95	26	4	2	1	0	0	0	0	0	0	0	0	0	0	17499	4201	44	12	1	0	1	0	1	0
ES44i	G	82	0	1	1	21408	13982	545	265	40	65	151	0	0	3	0	2	0	0	0	0	0	15767	9853	227	79	10	12	59	2	1	0	0	0	0	0	0	0	0	14844	6684	148	37	7	5	34	0	0	0
	C	83	0	0	0	35447	677	157	166	10	1	1	2	0	0	0	0	0	0	0	0	0	25691	222	51	41	2	2	1	0	0	0	0	0	0	0	0	0	0	21550	160	25	22	0	2	0	0	0	0
ES43d	C	84	2	0	-2	16186	705	19536	28	5	0	0	0	1	0	0	0	0	0	0	0	0	11131	245	14621	10	2	0	0	1	0	0	0	0	0	0	0	0	0	7787	219	13742	6	4	1	0	0	0	0
ES42d	G	85	4	0	-4	17391	529	96	121	18313	11	0	0	0	0	0	0	0	0	0	0	0	12077	183	57	117	13563	9	0	2	0	2	0	0	0	0	0	0	0	8858	107	38	71	12674	10	0	1	0	0
ES41i	A	86	0	1	1	22055	13061	1066	103	145	22	7	1	0	1	0	0	0	0	0	0	0	16438	9122	330	38	67	13	1	0	0	0	0	0	1	0	0	0	0	15369	6123	202	23	38	4	0	0	0	0
ES40i	A	87	0	4	4	21403	915	1022	583	12461	68	5	3	0	0	0	1	0	0	0	0	0	15614	437	515	690	8735	18	1	0	0	0	0	0	0	0	0	0	0	14738	284	311	549	5864	11	1	0	1	0
ES39i	A	88	1	3	2	2530	20194	504	12942	242	27	16	4	1	0	0	0	1	0	0	0	0	2222	14192	240	9197	147	7	2	2	0	0	0	1	0	0	0	0	0	2179	13050	148	6289	81	9	2	0	1	0
ES38i	A	89	0	1	1	19043	14107	1920	1006	158	139	17	70	1	0	0	0	0	0	0	0	0	14778	9635	1025	436	54	56	4	18	4	0	0	0	0	0	0	0	0	14255	6562	632	249	28	15	1	16	1	0
ES37i	A	90	0	1	1	20277	13703	1047	416	269	320	83	90	255	1	0	0	0	0	0	0	0	14975	9633	568	219	90	100	32	49	339	5	0	0	0	0	0	0	0	14354	6594	300	120	47	48	30	37	226	3
	A	91	0	0	0	31415	1242	2503	751	280	77	180	5	3	2	0	1	2	0	0	0	0	23571	635	1278	247	123	29	117	2	7	0	1	0	0	0	0	0	0	20303	384	782	145	54	16	68	1	3	3
ES36i	G	92	0	4	4	19229	2827	676	1691	11831	145	42	3	4	4	5	2	2	0	0	0	0	14979	1040	498	899	8542	33	8	2	1	1	4	3	0	0	0	0	0	14302	567	360	546	5956	11	14	1	1	0
ES35i	G	93	0	3	3	21412	1671	797	12024	415	116	16	8	2	0	0	0	0	0	0	0	0	15968	688	472	8572	224	74	7	5	0	0	0	0	0	0	0	0	0	14913	428	305	5931	132	42	7	1	0	0
	G	94	0	0	0	32743	2330	332	569	369	61	35	18	1	0	2	0	1	0	0	0	0	24003	1310	135	348	167	13	11	21	0	2	0	0	0	0	0	0	0	20592	733	71	221	118	8	9	7	0	0
	A	95	0	0	0	32284	2042	1247	358	118	47	45	75	26	195	19	5	0	0	0	0	0	23840	1063	669	106	50	40	20	80	9	117	16	0	0	0	0	0	0	20570	602	344	67	28	14	8	56	12	55
ES34i	G	96	0	1	1	21141	12993	1405	685	62	66	35	17	11	36	5	0	4	1	0	0	0	15180	9459	1094	163	25	34	24	5	2	22	1	1	0	0	0	0	0	14206	6708	712	83	14	23	5	1	2	5
ES33i	G	97	0	2	2	16599	1141	14765	2691	829	164	200	65	5	0	1	0	1	0	0	0	0	11467	1088	11825	1023	476	57	43	30	1	0	0	0	0	0	0	0	0	11479	870	8525	533	269	38	31	12	1	0
	C	98	0	0	0	31257	3617	283	1217	62	10	11	2	1	0	1	0	0	0	0	0	0	22205	2870	170	726	22	6	0	11	0	0	0	0	0	0	0	0	0	19229	1973	96	425	24	4	2	5	1	0
	G	99	0	0	0	32725	1222	88	2392	28	3	3	0	0	0	0	0	0	0	0	0	0	23672	731	26	1561	20	0	0	0	0	0	0	0	0	0	0	0	0	20083	477	24	1167	7	1	0	0	0	0
ES32i	G	100	0	2	2	15588	5139	14745	247	481	42	23	17	153	21	4	1	0	0	0	0	0	10681	3207	10398	134	1352	21	17	10	169	20	1	0	0	0	0	0	0	10817	2120	7693	74	868	17	13	6	139	12
ES31i	G	101	0	8	8	15462	4247	1851	182	402	124	177	321	13491	199	3	2	0	0	0	0	0	10660	2653	2228	110	315	85	74	204	9533	141	7	0	0	0	0	0	0	10770	1860	1425	35	157	44	72	146	7136	106
ES30i	G	102	0	2	2	15683	381	18609	915	810	40	9	5	9	0	0	0	0	0	0	0	0	10658	377	12888	642	1364	52	20	5	4	0	0	0	0	0	0	0	0	10815	235	9370	332	938	46	13	8	1	1
ES29i	A	103	0	4	4	18662	1505	577	547	15067	46	48	3	3	3	0	0	0	0	0	0	0	12614	2132	440	339	10442	19	24	0	0	0	0	0	0	0	0	0	0	12322	1197	334	243	7615	19	27	0	1	1
ES28i	G	104	0	2	2	16383	4083	15094	773	31	37	6	45	7	0	2	0	0	0	0	0	0	12655	2389	10564	333	25	7	6	23	5	1	2	0	0	0	0	0	0	12232	1645	7665	181	9	11	6	3	3	1
	G	105	0	0	0	31118	1517	289	3406	48	59	4	19	0	0	1	0	0	0	0	0	0	23184	642	161	1948	31	26	2	14	2	0	0	0	0	0	0	0	0	19907	387	107	1328	10	17	1	2	0	0
ES27i	A	106	0	3	3	17658	695	774	16511	88	718	9	0	8	0	0	0	0	0	0	0	0	12228	299	483	12666	33	290	4	2	4	0	1	0	0	0	0	0	0	12239	184	352	8802	23	154	2	0	2	1
	G	107	0	0	0	30544	4351	1229	197	63	45	6	5	1	18	1	1	0	0	0	0	0	22885	2265	721	78	35	11	0	2	0	13	0	0	0	0	0	0	0	19660	1434	583	41	24	7	0	0	1	9
ES26i	A	108	0	2	2	16905	1943	17312	195	76	8	13	8	1	0	0	0	0	0	0	0	0	10993	1205	13659	103	25	3	7	14	1	0	0	0	0	0	0	0	0	10781	960	9930	57	20	3	2	5	1	0
ES25i	G	109	0	1	1	12906	21195	1229	901	146	34	6	11	32	1	0	0	0	0	0	0	0	9215	15779	611	346	32	14	2	3	8	0	0	0	0	0	0	0	0	9642	11368	524	195	16	5	0	1	8	0
ES24d	C	110	3	1	-2	2875	22365	410	10724	33	49	3	0	0	1	0	1	0	0	0	0	0	2373	16337	152	7137	7	4	0	0	0	0	0	0	0	0	0	0	0	1874	11728	93	8062	0	2	0	0	0	0
	A	111	0	0	0	36154	191	85	30	0	0	0	1	0	0	0	0	0	0	0	0	0	25858	98	44	10	0	0	0	0	0	0	0	0	0	0	0	0	0	21674	47	30	6	2	0	0	0	0	0
ES23i	A	112	0	2	2	12746	2265	21018	206	125	52	25	23	0	0	0	1	0	0	0	0	0	9262	1335	15239	81	56	17	14	6	0	0	0	0	0	0	0	0	0	10125	968	10570	43	24	16	8	5	0	0
Es22i	A	113	0	3	3	12662	2253	768	20038	532	138	30	29	3	0	0	1	5	1	1	0	0	8872	1223	487	15098	250	52	13	10	0	0	0	2	2	1	0	0	0	9379	995	391	10813	140	29	8	2	0	0
Es21i	A	114	0	2	2	10866	1570	21603	1323	237	147	338	33	313	10	2	2	15	1	1	0	0	7990	773	16139	748	69	50	125	7	96	1	2	5	4	1	0	0	0	8874	436	11568	756	30	32	35	3	21	0
ES20i	A	115	0	1	1	10501	21361	1923	1325	792	272	118	136	17	6	0	1	7	0	1	1	0	8646	14974	1093	623	438	114	70	40	6	2	0	0	4	0	0	0	0	9559	10518	914	453	204	58	27	14	7	2
	G	116	0	0	0	29613	2357	1792	759	689	500	111	288	244	25	14	30	32	7	0	0	0	22076	1457	928	400	486	211	76	152	138	14	9	13	45	5	0	0	0	18956	1368	612	238	257	92	42	97	65	2
	A	117	0	0	0	30596	2269	730	1081	531	300	242	141	62	85	54	101	216	46	6	1	0	22665	1447	408	516	221	169	111	42	24	34	24	82	222	44	1	0	0	19659	1150	245	263	81	103	48	26	16	14
ES19d	G	118	3	0	-3	22416	3093	782	9139	198	377	362	15	12	13	6	13	31	4	0	0	0	16999	1812	423	6278	100	181	175	6	6	10	1	2	14	3	0	0	0	12978	1174	318	7034	55	101	81	6	0	2
	G	119	0	0	0	29903	3342	710	1642	446	361	22	15	16	3	0	1	0	0	0	0	0	22659	1775	466	840	138	108	8	11	2	3	0	0	0	0	0	0	0	19930	1004	291	423	72	29	2	7	1	0
	G	120	0	0	0	30097	2195	1151	2151	127	680	23	28	3	6	0	0	0	0	0	0	0	22227	1810	443	1088	71	345	6	19	0	1	0	0	0	0	0	0	0	19123	1628	208	557	41	181	5	10	0	6
	G	121	1	1	0	2252	28725	2318	956	449	1676	52	24	4	4	0	1	0	0	0	0	0	1539	21079	1896	509	190	731	31	30	4	1	0	0	0	0	0	0	0	1254	17926	1760	352	110	329	17	8	0	2
	G	122	0	0	0	29294	4540	1222	696	188	468	25	25	2	1	0	0	0	0	0	0	0	21414	3000	1010	264	47	191	30	50	3	1	0	0	0	0	0	0	0	18245	2375	844	144	42	85	10	12	1	0
ES18i	G	123	0	1	1	9470	25302	402	610	73	92	167	339	4	2	0	0	0	0	0	0	0	6245	18848	269	355	47	84	38	119	3	1	1	0	0	0	0	0	0	6941	14251	232	213	15	34	26	44	3	0
	G	124	0	0	0	29637	5407	241	250	566	70	30	252	6	2	0	0	0	0	0	0	0	21931	3083	126	193	335	46	29	265	2	0	0	0	0	0	0	0	0	19004	2146	102	101	237	15	20	132	1	1
ES17i	G	125	0	4	4	10248	518	4662	386	20274	180	186	4	3	0	0	0	0	0	0	0	0	6353	388	3054	338	15763	61	51	2	0	0	0	0	0	0	0	0	0	6648	305	2563	336	11823	30	53	0	0	0
ES16i	G	126	0	2	2	7962	852	27582	45	8	4	1	6	1	0	0	0	0	0	0	0	0	5390	696	19888	26	4	1	0	4	1	0	0	0	0	0	0	0	0	6001	606	15127	18	1	2	2	1	0	0
	A	127	0	0	0	28303	2781	3273	1795	22	253	22	7	0	0	0	0	5	0	0	0	0	20597	1934	1683	1486	10	293	5	0	2	0	0	0	0	0	0	0	0	17520	1587	1095	1409	4	139	2	2	1	0
ES15i	A	128	0	3	3	7347	4386	242	24420	13	18	34	0	0	0	0	0	1	0	0	0	0	4947	3113	122	17785	6	19	16	0	2	0	0	0	0	0	0	0	0	5646	2710	98	13278	5	14	7	1	0	0
	C	129	0	0	0	34349	1714	176	170	32	4	4	7	0	0	4	1	0	0	0	0	0	24478	1188	124	178	23	0	9	6	0	2	2	0	0	0	0	0	0	19846	1607	119	168	11	1	1	3	0	1
	C	130	0	0	0	35472	676	146	22	141	3	0	0	1	0	0	0	0	0	0	0	0	25179	512	129	8	182	0	0	0	0	0	0	0	0	0	0	0	0	21196	340	122	15	83	2	0	1	0	0
	C	131	0	0	0	35976	315	140	21	7	2	0	0	0	0	0	0	0	0	0	0	0	25657	250	71	13	13	6	0	0	0	0	0	0	0	0	0	0	0	21432	234	75	9	5	4	0	0	0	0
ES14d	G	132	3	0	-3	27282	2323	269	6548	11	23	5	0	0	0	0	0	0	0	0	0	0	20989	1560	141	3293	6	19	1	0	0	1	0	0	0	0	0	0	0	17452	1479	128	2681	3	13	1	0	1	1
ES13d	G	133	4	0	-4	24905	960	2067	367	8144	9	6	0	1	1	1	0	0	0	0	0	0	18897	1039	1321	154	4594	4	0	0	0	0	1	0	0	0	0	0	0	15198	1512	1043	154	3845	4	2	0	0	0
ES12i	G	134	0	1	1	8170	21036	343	6873	19	16	4	0	0	0	0	0	0	0	0	0	0	6486	14862	190	4451	8	13	0	0	0	0	0	0	0	0	0	0	0	6614	11043	179	3908	4	10	1	0	0	0
ES11d	A	135	2	1	-1	684	24759	3244	518	7212	5	33	6	0	0	0	0	0	0	0	0	0	707	18636	1628	398	4617	4	17	3	0	0	0	0	0	0	0	0	0	971	14772	1548	442	3997	5	22	2	0	0
	A	136	0	0	0	24237	12004	54	92	7	5	4	0	1	12	42	3	0	0	0	0	0	16687	9247	22	38	7	1	1	1	0	0	6	0	0	0	0	0	0	13275	8423	22	26	6	1	1	0	0	2
	A	137	0	0	0	28112	911	7370	54	2	1	4	7	0	0	0	0	0	0	0	0	0	20691	649	4616	35	4	2	4	9	0	0	0	0	0	0	0	0	0	17165	612	3939	18	3	3	13	6	0	0
	G	138	0	0	0	28731	263	7383	22	57	5	0	0	0	0	0	0	0	0	0	0	0	21342	147	4499	6	15	1	0	0	0	0	0	0	0	0	0	0	0	17738	145	3861	7	8	0	0	0	0	0
ES10i	A	139	0	1	1	7254	29103	50	43	7	0	1	3	0	0	0	0	0	0	0	0	0	6335	19625	22	25	3	0	0	0	0	0	0	0	0	0	0	0	0	6417	15287	32	21	1	1	0	0	0	0
ES9i	A	140	0	2	2	2886	4889	28642	29	2	9	0	0	2	0	0	1	1	0	0	0	0	2152	4512	19331	10	2	1	0	0	0	0	0	0	2	0	0	0	0	2240	4418	15071	22	5	2	0	1	0	0
ES8i	A	141	0	1	1	10390	21252	4041	636	138	3	1	0	0	0	0	0	0	0	0	0	0	6684	14917	4141	213	54	0	1	0	0	0	0	0	0	0	0	0	0	6415	11168	3975	136	64	1	0	0	0	0
	C	142	0	0	0	23698	926	11764	38	34	1	0	0	0	0	0	0	0	0	0	0	0	16032	573	9363	21	20	0	0	1	0	0	0	0	0	0	0	0	0	12164	573	8993	22	6	0	0	1	0	0
	A	143	0	0	0	36431	24	4	1	1	0	0	0	0	0	0	0	0	0	0	0	0	25997	12	1	0	0	0	0	0	0	0	0	0	0	0	0	0	0	21742	15	1	0	1	0	0	0	0	0
ES7d	C	144	1	0	-1	34849	1600	5	0	5	0	0	0	2	0	0	0	0	0	0	0	0	25167	832	10	0	0	0	0	1	0	0	0	0	0	0	0	0	0	21019	736	4	0	0	0	0	0	0	0
	G	145	0	0	0	36369	76	16	0	0	0	0	0	0	0	0	0	0	0	0	0	0	25972	31	6	1	0	0	0	0	0	0	0	0	0	0	0	0	0	21725	29	4	0	1	0	0	0	0	0
ES6d	A	146	3	1	-2	7591	26295	1388	1140	42	2	2	0	0	0	0	1	0	0	0	0	0	4658	20312	465	562	13	0	0	0	0	0	0	0	0	0	0	0	0	4085	16809	386	471	8	0	0	0	0	0
ES5i	G	147	0	2	2	2312	131	34006	6	0	0	0	0	6	0	0	0	0	0	0	0	0	1003	135	24863	6	0	0	0	0	3	0	0	0	0	0	0	0	0	869	156	20727	2	0	0	0	0	5	0
ES4i	A	148	0	1	1	2227	34219	11	2	0	1	0	1	0	0	0	0	0	0	0	0	0	948	25056	2	1	3	0	0	0	0	0	0	0	0	0	0	0	0	783	20960	10	5	1	0	0	0	0	0
	A	149	0	0	0	36437	13	6	2	0	0	2	1	0	0	0	0	0	0	0	0	0	25998	4	7	0	0	0	1	0	0	0	0	0	0	0	0	0	0	21744	10	2	2	0	0	0	1	0	0
	G	150	0	0	0	36432	9	16	3	0	1	0	0	0	0	0	0	0	0	0	0	0	25988	3	14	3	2	0	0	0	0	0	0	0	0	0	0	0	0	21748	2	8	0	1	0	0	0	0	0
ES3i	A	151	0	2	2	817	30	35607	4	2	1	0	0	0	0	0	0	0	0	0	0	0	461	16	25533	0	0	0	0	0	0	0	0	0	0	0	0	0	0	375	19	21364	1	0	0	0	0	0	0
	G	152	0	0	0
	A	153	0	0	0
ES2d	A	154	4	3	-1
	G	155	0	0	0
	A	156	0	0	0
ES1i	A	157	0	1	1
	A	158	1	1	0
	A	159	0	0	0
	G	160	0	0	0
	A	161	0	0	0
	A	162	1	1	0
3' end	G	163	1	1	0
Total
[truncated: 7 more columns]

## Sheet: RPS12_H2RNAi RESC6-IP 0-4Day R2
RPS12_KREH2-RNAi_RESC6-IP_0-4 Day_R2
						J34 - H2 RNAi 0Day - RESC6 IP - Bio Rep																	J35 - H2 RNAi 3Day - RESC6 IP - Bio Rep																	J36 - H2 RNAi 4Day - RESC6 IP - Bio Rep
			no of Ts present before that position			# reads with indicated # Ts present before that position																	# reads with indicated # Ts present before that position																	# reads with indicated # Ts present before that position
	sequence	T-stripped	pre-edited	edited	editing events; del = -; ins = +	0	1	2	3	4	5	6	7	8	9	10	11	12	13	14	15	16	0	1	2	3	4	5	6	7	8	9	10	11	12	13	14	15	16	0	1	2	3	4	5	6	7	8	9
	C	1
5' end	A	2
	A	3
	A	4
	C	5
	A	6
	C	7
	G	8
	A	9
	A	10
	A	11
	C	12
	A	13
	A	14
	A	15
	C	16	0	0	0	34911	0	0	0	0	0	0	0	0	0	0	0	0	0	0	0	0	34487	0	0	0	0	0	0	0	0	0	0	0	0	0	0	0	0	41318	0	0	0	0	0	0	0	0	0
	A	17	1	1	0	312	34598	1	0	0	0	0	0	0	0	0	0	0	0	0	0	0	488	33998	1	0	0	0	0	0	0	0	0	0	0	0	0	0	0	307	41010	0	1	0	0	0	0	0	0
	A	18	0	0	0	34864	22	10	14	0	0	0	1	0	0	0	0	0	0	0	0	0	34443	20	17	7	0	0	0	0	0	0	0	0	0	0	0	0	0	41301	9	6	2	0	0	0	0	0	0
	A	19	0	0	0	34781	70	56	4	0	0	0	0	0	0	0	0	0	0	0	0	0	34316	89	76	6	0	0	0	0	0	0	0	0	0	0	0	0	0	41213	61	42	2	0	0	0	0	0	0
	G	20	0	0	0	34775	72	55	6	1	1	1	0	0	0	0	0	0	0	0	0	0	34380	55	47	4	0	0	1	0	0	0	0	0	0	0	0	0	0	41267	24	21	2	2	0	2	0	0	0
	A	21	1	1	0	6015	28618	220	31	9	0	3	1	4	9	1	0	0	0	0	0	0	5594	28703	168	13	4	1	1	0	0	3	0	0	0	0	0	0	0	3635	37597	81	3	2	0	0	0	0	0
	A	22	0	0	0	29677	1540	3596	73	9	5	10	1	0	0	0	0	0	0	0	0	0	30519	1267	2653	36	6	2	3	0	1	0	0	0	0	0	0	0	0	38901	790	1601	21	1	0	3	1	0	0
ES76i	A	23	0	1	1	31031	3319	407	99	34	5	12	4	0	0	0	0	0	0	0	0	0	30912	3131	370	53	15	5	1	0	0	0	0	0	0	0	0	0	0	39059	1963	235	39	15	4	3	0	0	0
	A	24	0	0	0	32075	2109	151	360	32	27	64	10	81	2	0	0	0	0	0	0	0	32460	1535	102	323	18	10	17	2	19	1	0	0	0	0	0	0	0	40069	916	84	203	9	11	8	1	17	0
	A	25	0	0	0	29275	1754	212	301	2809	487	27	13	2	26	2	3	0	0	0	0	0	30375	1295	99	242	2104	334	19	2	3	12	1	1	0	0	0	0	0	38737	779	70	156	1334	219	6	1	1	14
ES75i	G	26	0	4	4	26837	484	3292	218	2338	1694	38	5	2	0	0	3	0	0	0	0	0	27926	423	2503	141	2220	1247	20	5	2	0	0	0	0	0	0	0	0	37148	291	1610	93	1383	767	24	2	0	0
ES74i	G	27	0	8	8	26478	354	194	125	47	2966	158	186	4039	86	33	58	122	52	9	4	0	27629	467	135	86	47	2186	91	121	3388	84	20	41	128	54	8	1	1	36943	403	68	91	32	1314	78	82	2080	47
	C	28	0	0	0	34317	417	96	55	16	3	5	0	1	0	1	0	0	0	0	0	0	34021	363	51	34	12	0	5	0	1	0	0	0	0	0	0	0	0	40909	348	28	20	8	1	3	0	0	0
	G	29	0	0	0	34763	101	31	14	1	0	0	0	1	0	0	0	0	0	0	0	0	34398	48	26	14	1	0	0	0	0	0	0	0	0	0	0	0	0	41262	33	11	10	2	0	0	0	0	0
ES73i	A	30	0	1	1	26631	7911	119	152	51	13	29	2	2	0	0	1	0	0	0	0	0	27963	6305	68	80	32	9	28	1	1	0	0	0	0	0	0	0	0	37276	3898	59	50	23	2	7	0	3	0
ES72i	G	31	0	1	1	26411	7982	253	132	81	18	3	1	1	1	6	18	3	1	0	0	0	27735	6459	158	73	32	7	2	1	1	2	3	10	4	0	0	0	0	37048	4059	100	63	30	4	2	0	4	0
ES71i	G	32	0	1	1	26595	7791	206	194	89	13	19	1	1	2	0	0	0	0	0	0	0	27923	6187	112	206	29	10	20	0	0	0	0	0	0	0	0	0	0	37166	3808	87	226	20	6	4	1	0	0
	A	33	0	0	0	33878	511	237	203	18	24	32	4	3	1	0	0	0	0	0	0	0	33452	650	254	98	9	12	11	0	1	0	0	0	0	0	0	0	0	40436	511	243	89	14	13	11	0	1	0
ES70d	G	34	6	5	-1	233	595	484	187	139	7369	25875	25	4	0	0	0	0	0	0	0	0	169	529	533	188	150	5926	26966	23	3	0	0	0	0	0	0	0	0	178	508	466	146	99	3632	36247	40	2	0
ES69i	A	35	0	1	1	26350	8290	90	71	22	21	48	1	18	0	0	0	0	0	0	0	0	27545	6788	51	45	15	9	21	2	11	0	0	0	0	0	0	0	0	36865	4335	26	38	16	9	20	3	6	0
ES68i	G	36	0	1	1	26386	8221	114	105	40	19	14	7	2	1	1	1	0	0	0	0	0	27569	6708	59	90	29	17	12	1	1	0	0	1	0	0	0	0	0	36925	4256	47	35	19	16	16	1	3	0
ES67d	G	37	1	0	-1	8256	26167	88	260	21	27	81	2	0	0	5	2	2	0	0	0	0	6918	27183	65	225	21	16	53	0	0	0	5	0	1	0	0	0	0	4488	36514	53	202	11	13	33	0	1	1
ES66i	G	38	0	2	2	26331	130	8165	37	51	10	12	27	130	4	7	4	1	1	1	0	0	27452	120	6698	29	24	5	7	12	131	6	0	1	2	0	0	0	0	36771	123	4227	20	19	7	2	6	138	2
ES65i	G	39	0	2	2	26112	496	8089	101	29	76	2	6	0	0	0	0	0	0	0	0	0	27269	485	6618	46	22	38	4	5	0	0	0	0	0	0	0	0	0	36566	469	4179	51	12	36	0	2	1	0
ES64i	A	40	0	3	3	26255	252	303	7953	32	13	80	22	1	0	0	0	0	0	0	0	0	27520	207	198	6483	16	2	49	12	0	0	0	0	0	0	0	0	0	36850	262	159	3998	13	4	28	3	1	0
	C	41	0	0	0	34249	391	178	65	21	4	1	1	0	0	1	0	0	0	0	0	0	33919	344	181	35	8	0	0	0	0	0	0	0	0	0	0	0	0	40878	275	122	36	4	3	0	0	0	0
ES63d	G	42	1	0	-1	9233	25636	27	13	2	0	0	0	0	0	0	0	0	0	0	0	0	8680	25791	11	3	1	1	0	0	0	0	0	0	0	0	0	0	0	6198	35113	5	2	0	0	0	0	0	0
ES62i	G	43	0	4	4	26159	278	209	285	7931	40	3	6	0	0	0	0	0	0	0	0	0	27722	268	159	200	6111	23	0	3	0	1	0	0	0	0	0	0	0	37320	207	132	110	3525	15	3	5	1	0
ES61i	A	44	0	4	4	26137	391	211	276	7889	4	2	0	0	0	0	0	1	0	0	0	0	27438	455	276	258	6050	9	1	0	0	0	0	0	0	0	0	0	0	36929	375	302	214	3490	7	0	0	0	0
ES60i	G	45	0	3	3	25404	579	164	8477	240	42	4	1	0	0	0	0	0	0	0	0	0	25855	774	108	7507	227	11	4	0	1	0	0	0	0	0	0	0	0	35297	680	102	5051	170	14	3	1	0	0
ES59i	A	46	0	4	4	25392	14	65	1459	7977	4	0	0	0	0	0	0	0	0	0	0	0	25832	30	57	2244	6318	5	1	0	0	0	0	0	0	0	0	0	0	35343	67	60	2090	3748	9	1	0	0	0
ES58i	G	47	0	1	1	25332	8000	34	48	1485	2	10	0	0	0	0	0	0	0	0	0	0	25808	6347	39	73	2216	2	2	0	0	0	0	0	0	0	0	0	0	35399	3793	82	78	1963	2	1	0	0	0
ES57i	A	48	0	2	2	25344	745	8000	22	792	5	1	1	0	1	0	0	0	0	0	0	0	25918	815	6311	46	1395	0	1	0	0	0	0	0	0	1	0	0	0	35550	666	3761	40	1297	1	2	1	0	0
ES56i	A	49	0	2	2	25314	32	9541	16	5	1	1	0	1	0	0	0	0	0	0	0	0	25995	84	8379	20	9	0	0	0	0	0	0	0	0	0	0	0	0	35681	93	5535	5	4	0	0	0	0	0
ES55i	A	50	0	1	1	25326	8851	728	1	2	3	0	0	0	0	0	0	0	0	0	0	0	26069	7651	752	8	7	0	0	0	0	0	0	0	0	0	0	0	0	35733	4965	603	15	1	1	0	0	0	0
ES54i	G	51	0	1	1	25392	9158	309	13	32	3	0	3	0	1	0	0	0	0	0	0	0	25975	8218	247	13	33	0	0	1	0	0	0	0	0	0	0	0	0	35409	5698	177	2	31	1	0	0	0	0
	A	52	0	0	0	33998	114	747	6	4	40	2	0	0	0	0	0	0	0	0	0	0	33538	196	701	4	2	41	4	0	1	0	0	0	0	0	0	0	0	40566	149	564	1	1	37	0	0	0	0
	G	53	0	0	0	34804	54	50	2	1	0	0	0	0	0	0	0	0	0	0	0	0	34408	22	53	2	0	0	1	0	1	0	0	0	0	0	0	0	0	41257	17	41	1	0	1	1	0	0	0
ES53i	C	54	0	1	1	27540	7357	5	8	1	0	0	0	0	0	0	0	0	0	0	0	0	29118	5347	15	3	4	0	0	0	0	0	0	0	0	0	0	0	0	38162	3140	7	4	5	0	0	0	0	0
	C	55	0	0	0	34897	13	1	0	0	0	0	0	0	0	0	0	0	0	0	0	0	34469	7	11	0	0	0	0	0	0	0	0	0	0	0	0	0	0	41288	16	12	2	0	0	0	0	0	0
	G	56	0	0	0	33080	1829	1	1	0	0	0	0	0	0	0	0	0	0	0	0	0	32119	2363	4	1	0	0	0	0	0	0	0	0	0	0	0	0	0	39515	1802	1	0	0	0	0	0	0	0
ES52d	C	57	2	0	-2	9784	127	24994	5	1	0	0	0	0	0	0	0	0	0	0	0	0	8988	110	25386	2	0	0	1	0	0	0	0	0	0	0	0	0	0	6508	127	34680	2	0	1	0	0	0	0
	G	58	0	0	0	34870	38	1	0	2	0	0	0	0	0	0	0	0	0	0	0	0	34472	14	1	0	0	0	0	0	0	0	0	0	0	0	0	0	0	41303	13	2	0	0	0	0	0	0	0
	A	59	0	0	0	34754	73	20	42	3	9	5	5	0	0	0	0	0	0	0	0	0	34350	83	25	21	0	3	4	1	0	0	0	0	0	0	0	0	0	41196	84	11	17	3	3	2	2	0	0
ES51i	G	60	0	2	2	25071	440	9319	72	3	1	1	4	0	0	0	0	0	0	0	0	0	25470	510	8484	20	1	0	2	0	0	0	0	0	0	0	0	0	0	34788	462	6036	26	4	0	2	0	0	0
	C	61	0	0	0	34776	99	22	13	1	0	0	0	0	0	0	0	0	0	0	0	0	34362	106	8	8	0	0	2	1	0	0	0	0	0	0	0	0	0	41192	106	13	7	0	0	0	0	0	0
	C	62	0	0	0	34902	7	0	2	0	0	0	0	0	0	0	0	0	0	0	0	0	34484	2	1	0	0	0	0	0	0	0	0	0	0	0	0	0	0	41316	2	0	0	0	0	0	0	0	0
	C	63	0	0	0	34802	100	8	0	1	0	0	0	0	0	0	0	0	0	0	0	0	34381	104	1	1	0	0	0	0	0	0	0	0	0	0	0	0	0	41222	92	3	1	0	0	0	0	0	0
	A	64	0	0	0	34701	199	7	4	0	0	0	0	0	0	0	0	0	0	0	0	0	34342	139	1	5	0	0	0	0	0	0	0	0	0	0	0	0	0	41192	117	8	0	1	0	0	0	0	0
	G	65	0	0	0	34538	113	170	79	3	6	1	0	1	0	0	0	0	0	0	0	0	34186	74	131	86	1	0	0	1	8	0	0	0	0	0	0	0	0	40967	72	203	71	1	1	0	0	3	0
ES50i	C	66	0	2	2	26856	134	7882	25	6	8	0	0	0	0	0	0	0	0	0	0	0	27584	86	6799	10	3	4	0	0	0	0	1	0	0	0	0	0	0	36599	79	4627	6	1	5	0	1	0	0
	C	67	0	0	0	33012	1863	35	0	1	0	0	0	0	0	0	0	0	0	0	0	0	32349	2108	30	0	0	0	0	0	0	0	0	0	0	0	0	0	0	39572	1726	19	1	0	0	0	0	0	0
	G	68	0	0	0	33034	1805	40	32	0	0	0	0	0	0	0	0	0	0	0	0	0	32323	2114	28	20	2	0	0	0	0	0	0	0	0	0	0	0	0	39563	1717	18	20	0	0	0	0	0	0
	G	69	0	0	0	32947	265	1598	33	20	46	0	2	0	0	0	0	0	0	0	0	0	32527	235	1661	13	13	36	1	0	1	0	0	0	0	0	0	0	0	39219	234	1774	19	19	49	2	2	0	0
ES49i	A	70	0	1	1	24370	10255	220	31	16	5	4	10	0	0	0	0	0	0	0	0	0	24822	9544	84	9	5	16	1	6	0	0	0	0	0	0	0	0	0	34207	6978	96	18	9	8	1	1	0	0
	A	71	0	0	0	33105	233	168	74	1291	32	6	0	2	0	0	0	0	0	0	0	0	32683	136	125	65	1456	16	3	0	3	0	0	0	0	0	0	0	0	39418	156	123	51	1544	24	1	0	1	0
	C	72	0	0	0	34488	386	33	3	0	1	0	0	0	0	0	0	0	0	0	0	0	34055	411	14	5	0	0	0	0	0	2	0	0	0	0	0	0	0	40920	378	17	2	1	0	0	0	0	0
	C	73	0	0	0	34765	126	10	6	2	2	0	0	0	0	0	0	0	0	0	0	0	34424	62	1	0	0	0	0	0	0	0	0	0	0	0	0	0	0	41236	73	9	0	0	0	0	0	0	0
	G	74	0	0	0	34728	36	139	7	1	0	0	0	0	0	0	0	0	0	0	0	0	34146	33	301	2	5	0	0	0	0	0	0	0	0	0	0	0	0	40993	39	283	3	0	0	0	0	0	0
	A	75	0	0	0	34076	330	167	79	22	229	4	2	2	0	0	0	0	0	0	0	0	33759	203	88	41	31	361	4	0	0	0	0	0	0	0	0	0	0	40601	208	81	52	23	346	4	2	0	0
	C	76	0	0	0	34227	353	88	222	18	2	0	0	1	0	0	0	0	0	0	0	0	34129	231	47	76	4	0	0	0	0	0	0	0	0	0	0	0	0	40977	209	51	71	9	1	0	0	0	0
	G	77	0	0	0	34800	92	8	10	1	0	0	0	0	0	0	0	0	0	0	0	0	34438	31	14	4	0	0	0	0	0	0	0	0	0	0	0	0	0	41280	23	7	8	0	0	0	0	0	0
ES48i	G	78	0	1	1	24360	10058	185	279	19	6	3	1	0	0	0	0	0	0	0	0	0	24957	9106	138	268	8	7	0	1	2	0	0	0	0	0	0	0	0	34462	6506	118	221	3	4	0	4	0	0
ES47i	A	79	0	1	1	23922	9711	656	553	19	33	3	7	1	2	0	1	3	0	0	0	0	24488	8991	517	470	6	8	2	3	0	0	0	0	2	0	0	0	0	34207	6340	375	377	4	7	0	5	0	0
ES46i	G	80	0	2	2	23756	1532	9379	144	22	14	5	42	4	11	1	0	0	0	1	0	0	23242	2416	8754	47	4	7	0	11	1	5	0	0	0	0	0	0	0	32499	2649	6127	29	4	1	0	5	0	3
ES45i	A	81	0	1	1	24563	9967	225	87	26	29	4	4	6	0	0	0	0	0	0	0	0	25038	9280	115	43	5	4	0	1	1	0	0	0	0	0	0	0	0	34560	6634	84	26	7	5	1	0	1	0
ES44i	G	82	0	1	1	20452	13446	526	264	38	52	130	0	0	2	0	1	0	0	0	0	0	20326	13659	313	96	12	14	67	0	0	0	0	0	0	0	0	0	0	29174	11724	241	85	10	12	68	4	0	0
	C	83	0	0	0	34040	600	129	133	5	1	1	2	0	0	0	0	0	0	0	0	0	34090	286	62	42	1	4	1	1	0	0	0	0	0	0	0	0	0	40962	257	57	35	4	3	0	0	0	0
ES43d	C	84	2	0	-2	15568	631	18681	25	6	0	0	0	0	0	0	0	0	0	0	0	0	15282	320	18865	14	6	0	0	0	0	0	0	0	0	0	0	0	0	14684	424	26198	11	1	0	0	0	0	0
ES42d	G	85	4	0	-4	16673	452	93	99	17578	12	2	2	0	0	0	0	0	0	0	0	0	16517	213	74	121	17549	13	0	0	0	0	0	0	0	0	0	0	0	17115	220	80	123	23768	12	0	0	0	0
ES41i	A	86	0	1	1	21037	12593	1044	85	123	13	12	2	2	0	0	0	0	0	0	0	0	21135	12714	474	64	86	10	4	0	0	0	0	0	0	0	0	0	0	30225	10475	452	61	80	19	4	1	1	0
ES40i	A	87	0	4	4	20401	896	972	553	12030	51	7	1	0	0	0	0	0	0	0	0	0	20208	609	667	831	12138	31	2	1	0	0	0	0	0	0	0	0	0	28929	563	688	1218	9885	31	3	1	0	0
ES39i	A	88	1	3	2	2363	19261	529	12485	224	36	12	1	0	0	0	0	0	0	0	0	0	2870	18362	341	12713	179	18	4	0	0	0	0	0	0	0	0	0	0	5338	24540	353	10901	167	11	6	1	1	0
ES38i	A	89	0	1	1	18204	13584	1801	981	142	123	30	45	0	1	0	0	0	0	0	0	0	19119	13281	1348	552	70	54	10	42	11	0	0	0	0	0	0	0	0	27768	11527	1257	576	85	57	11	28	8	1
ES37i	A	90	0	1	1	19348	13224	1014	363	274	256	85	95	248	4	0	0	0	0	0	0	0	19394	13247	721	307	99	128	68	74	445	3	1	0	0	0	0	0	0	28211	11434	768	191	99	93	45	66	404	7
	A	91	0	0	0	30210	1176	2388	669	246	76	135	1	10	0	0	0	0	0	0	0	0	31298	813	1653	364	137	34	167	6	14	0	0	1	0	0	0	0	0	38281	803	1595	275	146	32	169	4	12	1
ES36i	G	92	0	4	4	18330	2662	699	1575	11427	161	44	2	4	2	4	1	0	0	0	0	0	19342	1409	623	1200	11828	41	18	13	4	4	5	0	0	0	0	0	0	28168	1351	679	967	10083	43	16	1	2	2
ES35i	G	93	0	3	3	20313	1604	804	11685	400	95	6	1	2	0	0	0	0	1	0	0	0	20607	872	658	11980	272	90	5	3	0	0	0	0	0	0	0	0	0	29370	889	595	10072	275	109	5	1	1	0
	G	94	0	0	0	31398	2143	342	558	344	67	19	37	1	2	0	0	0	0	0	0	0	31926	1661	134	475	227	32	18	14	0	0	0	0	0	0	0	0	0	38847	1659	157	434	175	14	17	11	1	0
	A	95	0	0	0	30903	1942	1219	349	103	64	40	68	37	161	22	3	0	0	0	0	0	31727	1367	854	154	55	23	15	124	25	128	15	0	0	0	0	0	0	38778	1197	845	138	52	39	13	134	17	93
ES34i	G	96	0	1	1	20221	12619	1273	586	64	51	37	9	8	36	3	2	2	0	0	0	0	19752	12986	1388	248	25	28	21	5	3	29	1	0	1	0	0	0	0	27939	11723	1338	189	19	70	13	6	1	17
ES33i	G	97	0	2	2	15740	1095	14301	2547	817	140	198	66	3	4	0	0	0	0	0	0	0	15427	1248	15673	1340	623	53	88	32	2	1	0	0	0	0	0	0	0	21326	1825	16354	1158	520	47	54	31	2	1
	C	98	0	0	0	29722	3560	292	1264	56	11	2	3	1	0	0	0	0	0	0	0	0	29838	3549	193	855	30	12	2	7	0	0	1	0	0	0	0	0	0	34989	4986	239	1058	26	4	3	11	0	1
	G	99	0	0	0	31166	1292	87	2327	29	4	4	1	0	1	0	0	0	0	0	0	0	31577	866	37	1986	16	5	0	0	0	0	0	0	0	0	0	0	0	36909	1084	49	3258	13	2	1	2	0	0
ES32i	G	100	0	2	2	14831	5032	14102	269	389	46	29	23	174	15	0	1	0	0	0	0	0	14459	3926	14230	130	1433	35	14	5	227	27	1	0	0	0	0	0	0	19995	5387	13632	132	1834	34	16	9	257	22
ES31i	G	101	0	8	8	14738	4206	1760	157	398	112	131	277	12861	257	14	0	0	0	0	0	0	14381	3322	2455	127	402	115	97	300	13120	159	8	1	0	0	0	0	0	19807	4837	2992	136	395	96	125	318	12360	238
ES30i	G	102	0	2	2	14911	362	17967	820	793	40	7	8	3	0	0	0	0	0	0	0	0	14452	411	17272	730	1521	75	12	8	4	2	0	0	0	0	0	0	0	19935	505	17966	832	1959	79	28	10	3	0
ES29i	A	103	0	4	4	17946	1445	555	501	14377	38	44	3	2	0	0	0	0	0	0	0	0	16814	2478	515	403	14224	25	25	1	0	1	1	0	0	0	0	0	0	23948	2624	772	478	13422	24	41	1	7	1
ES28i	G	104	0	2	2	15548	4039	14519	685	28	31	1	46	13	0	0	1	0	0	0	0	0	16607	2989	14438	382	20	9	7	24	6	1	4	0	0	0	0	0	0	23136	4222	13442	430	27	26	6	26	1	1
	G	105	0	0	0	29648	1434	272	3424	55	56	7	14	0	1	0	0	0	0	0	0	0	30901	818	228	2467	25	29	3	16	0	0	0	0	0	0	0	0	0	36663	922	258	3414	21	32	1	4	0	1
ES27i	A	106	0	3	3	16855	682	830	15785	82	654	16	2	5	0	0	0	0	0	0	0	0	16289	368	569	16874	44	331	5	0	7	0	0	0	0	0	0	0	0	23717	457	777	15951	42	365	1	3	4	1
	G	107	0	0	0	29118	4311	1163	182	57	41	6	2	7	21	3	0	0	0	0	0	0	30511	2795	1003	95	38	20	2	3	0	20	0	0	0	0	0	0	0	36181	3691	1284	85	38	20	3	3	3	9
ES26i	A	108	0	2	2	16159	1873	16596	172	66	11	16	17	1	0	0	0	0	0	0	0	0	14563	1642	18127	111	28	4	4	8	0	0	0	0	0	0	0	0	0	20537	2299	18309	113	39	8	4	8	0	1
ES25i	G	109	0	1	1	12257	20369	1225	833	132	36	6	13	38	1	1	0	0	0	0	0	0	12367	20813	830	393	47	14	4	7	12	0	0	0	0	0	0	0	0	17694	22001	1130	416	44	8	5	5	15	0
ES24d	C	110	3	1	-2	2862	21496	389	10082	41	35	4	1	0	0	1	0	0	0	0	0	0	2829	21505	194	9936	13	10	0	0	0	0	0	0	0	0	0	0	0	4065	22936	218	14088	3	6	0	0	1	1
	A	111	0	0	0	34573	214	85	36	1	2	0	0	0	0	0	0	0	0	0	0	0	34317	101	51	18	0	0	0	0	0	0	0	0	0	0	0	0	0	41134	116	49	15	2	2	0	0	0	0
ES23i	A	112	0	2	2	11786	2264	20390	245	138	54	20	11	3	0	0	0	0	0	0	0	0	12625	1581	20095	86	47	32	14	7	0	0	0	0	0	0	0	0	0	18244	2093	20765	83	68	44	12	9	0	0
Es22i	A	113	0	3	3	11878	2111	846	19309	532	154	43	28	4	0	0	2	2	2	0	0	0	11889	1531	628	19998	334	74	21	8	1	0	0	0	1	2	0	0	0	17009	1961	946	21061	275	36	17	4	3	0
Es21i	A	114	0	2	2	10249	1632	20817	1189	218	158	325	21	275	13	2	4	8	0	0	0	0	10872	963	21373	900	78	62	137	8	88	2	2	0	1	0	1	0	0	15892	1019	22794	1304	70	63	81	7	78	2
ES20i	A	115	0	1	1	9712	20718	1814	1310	827	240	148	114	14	2	2	6	4	0	0	0	0	11807	19891	1402	716	430	115	89	25	7	1	0	2	1	0	1	0	0	17292	20472	1764	1021	550	110	66	33	8	0
	G	116	0	0	0	28086	2356	1833	840	638	459	107	276	210	23	8	19	40	15	1	0	0	29711	1975	1139	484	498	225	81	166	128	18	8	12	32	10	0	0	0	35310	2707	1360	593	587	212	101	200	172	10
	A	117	0	0	0	29092	2273	773	999	536	379	214	117	73	64	57	97	208	26	3	0	0	30613	1880	472	583	216	156	117	63	38	26	20	66	193	40	4	0	0	36535	2552	568	633	232	195	111	58	23	35
ES19d	G	118	3	0	-3	21657	3082	848	8340	178	367	338	17	16	21	7	16	17	7	0	0	0	22659	2288	491	8458	116	231	190	14	3	5	5	7	16	4	0	0	0	25526	2598	651	11956	110	230	192	12	1	5
	G	119	0	0	0	28274	3365	771	1640	486	331	9	12	18	5	0	0	0	0	0	0	0	30584	2037	579	958	186	115	10	13	3	1	1	0	0	0	0	0	0	37081	2166	649	1067	217	100	18	10	4	6
	G	120	0	0	0	28598	2243	1224	2030	166	611	11	17	0	9	0	2	0	0	0	0	0	30123	2246	527	1104	76	370	8	27	1	4	1	0	0	0	0	0	0	35358	3577	614	1265	72	379	12	26	1	11
	G	121	1	1	0	2289	27066	2362	977	512	1595	70	32	5	3	0	0	0	0	0	0	0	1914	28349	2589	604	248	714	33	32	3	0	1	0	0	0	0	0	0	2699	32795	3914	870	261	697	45	30	4	2
	G	122	0	0	0	27705	4495	1286	737	166	462	34	21	1	4	0	0	0	0	0	0	0	29086	3680	1071	304	82	194	29	41	0	0	0	0	0	0	0	0	0	33598	5114	1917	339	78	216	20	35	0	1
ES18i	G	123	0	1	1	8602	24510	426	611	84	126	160	379	10	3	0	0	0	0	0	0	0	8787	24563	362	461	48	88	52	118	4	4	0	0	0	0	0	0	0	11652	28298	540	481	59	86	45	154	2	1
	G	124	0	0	0	28156	5383	231	247	537	68	29	251	8	1	0	0	0	0	0	0	0	29485	3817	178	199	423	41	36	303	4	1	0	0	0	0	0	0	0	35567	4521	228	177	442	54	34	286	6	2
ES17i	G	125	0	4	4	9313	624	4747	375	19502	178	163	0	6	2	0	1	0	0	0	0	0	8386	487	4078	393	21013	61	65	2	2	0	0	0	0	0	0	0	0	11370	596	5459	604	23067	95	125	1	1	0
ES16i	G	126	0	2	2	7082	918	26852	46	2	2	5	4	0	0	0	0	0	0	0	0	0	7416	973	26053	28	6	4	3	4	0	0	0	0	0	0	0	0	0	9724	1176	30368	41	5	3	0	1	0	0
	A	127	0	0	0	26664	2852	3207	1892	13	253	18	6	1	0	1	1	2	1	0	0	0	27810	2724	1763	1842	21	318	4	3	0	0	1	0	0	0	1	0	0	32353	3014	2394	3227	17	300	10	2	0	0
ES15i	A	128	0	3	3	6525	4542	224	23566	19	14	20	0	0	0	0	0	1	0	0	0	0	6901	4191	142	23210	10	18	13	1	1	0	0	0	0	0	0	0	0	9180	5625	161	26290	7	35	19	1	0	0
	C	129	0	0	0	33016	1521	161	158	42	2	6	3	0	0	2	0	0	0	0	0	0	32330	1703	158	252	27	2	0	10	0	1	4	0	0	0	0	0	0	37828	2881	203	341	47	4	2	9	1	0
	C	130	0	0	0	33832	735	168	31	140	4	0	0	0	1	0	0	0	0	0	0	0	33506	637	158	15	165	4	0	2	0	0	0	0	0	0	0	0	0	40058	810	249	30	166	4	1	0	0	0
	C	131	0	0	0	34440	337	102	21	10	1	0	0	0	0	0	0	0	0	0	0	0	34012	371	81	11	8	4	0	0	0	0	0	0	0	0	0	0	0	40649	488	145	17	13	6	0	0	0	0
ES14d	G	132	3	0	-3	26364	2205	240	6067	6	19	3	5	2	0	0	0	0	0	0	0	0	28200	2019	200	4034	8	22	2	0	1	0	1	0	0	0	0	0	0	33537	2971	268	4498	9	34	1	0	0	0
ES13d	G	133	4	0	-4	23753	985	2157	340	7648	13	10	3	2	0	0	0	0	0	0	0	0	25373	1408	1832	230	5635	3	2	1	1	1	1	0	0	0	0	0	0	28704	2832	2191	286	7290	8	2	3	1	0
ES12i	G	134	0	1	1	7410	20186	336	6948	18	12	0	0	1	0	0	0	0	0	0	0	0	8706	20046	260	5450	7	18	0	0	0	0	0	0	0	0	0	0	0	11462	21165	382	8266	9	32	2	0	0	0
ES11d	A	135	2	1	-1	673	23553	2775	506	7344	5	46	7	2	0	0	0	0	0	0	0	0	1042	24984	2266	512	5648	10	21	2	2	0	0	0	0	0	0	0	0	1518	28190	2197	842	8522	15	30	2	2	0
	A	136	0	0	0	22928	11760	51	85	11	4	7	4	3	10	44	4	0	0	0	0	0	22630	11730	25	63	10	3	0	0	2	1	21	2	0	0	0	0	0	24336	16842	39	73	8	2	0	0	3	1
	A	137	0	0	0	26489	879	7483	37	8	4	3	6	2	0	0	0	0	0	0	0	0	27862	913	5646	41	9	1	5	9	1	0	0	0	0	0	0	0	0	31590	1197	8441	47	10	2	20	10	1	0
	G	138	0	0	0	27049	259	7535	11	50	6	0	0	0	1	0	0	0	0	0	0	0	28720	209	5528	6	21	2	0	0	0	1	0	0	0	0	0	0	0	32722	300	8252	18	23	3	0	0	0	0
ES10i	A	139	0	1	1	6494	28326	42	33	11	1	0	4	0	0	0	0	0	0	0	0	0	8476	25932	36	39	1	0	0	3	0	0	0	0	0	0	0	0	0	11047	30170	45	46	7	2	0	1	0	0
ES9i	A	140	0	2	2	2519	4373	27975	27	7	4	0	0	1	1	0	0	4	0	0	0	0	2920	6029	25514	19	0	2	1	0	0	0	1	1	0	0	0	0	0	3241	8301	29740	30	2	1	0	1	0	0
ES8i	A	141	0	1	1	10079	20457	3648	574	152	0	0	1	0	0	0	0	0	0	0	0	0	8581	20066	5424	331	81	2	1	1	0	0	0	0	0	0	0	0	0	12067	21423	7486	228	114	0	0	0	0	0
	C	142	0	0	0	22608	827	11425	24	22	2	3	0	0	0	0	0	0	0	0	0	0	21648	829	11959	31	19	1	0	0	0	0	0	0	0	0	0	0	0	22773	994	17485	51	14	0	0	1	0	0
	A	143	0	0	0	34890	17	4	0	0	0	0	0	0	0	0	0	0	0	0	0	0	34462	20	5	0	0	0	0	0	0	0	0	0	0	0	0	0	0	41294	20	2	2	0	0	0	0	0	0
ES7d	C	144	1	0	-1	33500	1397	8	1	5	0	0	0	0	0	0	0	0	0	0	0	0	33317	1162	6	1	1	0	0	0	0	0	0	0	0	0	0	0	0	40355	947	11	4	1	0	0	0	0	0
	G	145	0	0	0	34837	64	9	0	1	0	0	0	0	0	0	0	0	0	0	0	0	34419	57	9	2	0	0	0	0	0	0	0	0	0	0	0	0	0	41259	47	11	1	0	0	0	0	0	0
ES6d	A	146	3	1	-2	7664	24943	1263	1003	36	0	1	1	0	0	0	0	0	0	0	0	0	5686	27284	664	840	11	1	1	0	0	0	0	0	0	0	0	0	0	8541	31675	423	672	7	0	0	0	0	0
ES5i	G	147	0	2	2	2039	126	32734	6	3	0	0	0	3	0	0	0	0	0	0	0	0	1465	214	32787	7	1	2	0	1	10	0	0	0	0	0	0	0	0	1114	246	39940	3	5	0	0	1	9	0
ES4i	A	148	0	1	1	1971	32927	11	1	0	1	0	0	0	0	0	0	0	0	0	0	0	1378	33105	2	1	1	0	0	0	0	0	0	0	0	0	0	0	0	1055	40246	10	5	2	0	0	0	0	0
	A	149	0	0	0	34892	8	6	4	0	1	0	0	0	0	0	0	0	0	0	0	0	34471	8	6	0	1	0	1	0	0	0	0	0	0	0	0	0	0	41298	8	8	1	3	0	0	0	0	0
	G	150	0	0	0	34895	3	7	3	2	1	0	0	0	0	0	0	0	0	0	0	0	34455	7	21	1	3	0	0	0	0	0	0	0	0	0	0	0	0	41286	4	24	4	0	0	0	0	0	0
ES3i	A	151	0	2	2	707	29	34170	4	1	0	0	0	0	0	0	0	0	0	0	0	0	696	19	33770	2	0	0	0	0	0	0	0	0	0	0	0	0	0	584	33	40694	4	3	0	0	0	0	0
	G	152	0	0	0
	A	153	0	0	0
ES2d	A	154	4	3	-1
	G	155	0	0	0
	A	156	0	0	0
ES1i	A	157	0	1	1
	A	158	1	1	0
	A	159	0	0	0
	G	160	0	0	0
	A	161	0	0	0
	A	162	1	1	0
3' end	G	163	1	1	0
Total
[truncated: 7 more columns]

## Sheet: RPS12_F1-RNAi mtRNA 0-4 Day R1
RPS12_KH2F1-RNAi_mtRNA_0-4 Day_R1
						J01 - F1 RNAi 0Day mtRNA																	J02 - F1 RNAi 3Day mtRNA																	J03 - F1 RNAi 4Day mtRNA
			no of Ts present before that position			# reads with indicated # Ts present before that position																	# reads with indicated # Ts present before that position																	# reads with indicated # Ts present before that position
	sequence	T-stripped	pre-edited	edited	editing events; del = -; ins = +	0	1	2	3	4	5	6	7	8	9	10	11	12	13	14	15	16	0	1	2	3	4	5	6	7	8	9	10	11	12	13	14	15	16	0	1	2	3	4	5	6	7	8	9
	C	1
5' end	A	2
	A	3
	A	4
	C	5
	A	6
	C	7
	G	8
	A	9
	A	10
	A	11
	C	12
	A	13
	A	14
	A	15
	C	16	0	0	0	33945	0	0	0	0	0	0	0	0	0	0	0	0	0	0	0	0	24059	0	0	0	0	0	0	0	0	0	0	0	0	0	0	0	0	29512	0	0	0	0	0	0	0	0	0
	A	17	1	1	0	95	33848	2	0	0	0	0	0	0	0	0	0	0	0	0	0	0	29	24030	0	0	0	0	0	0	0	0	0	0	0	0	0	0	0	32	29480	0	0	0	0	0	0	0	0
	A	18	0	0	0	33927	11	2	5	0	0	0	0	0	0	0	0	0	0	0	0	0	24056	3	0	0	0	0	0	0	0	0	0	0	0	0	0	0	0	29510	0	2	0	0	0	0	0	0	0
	A	19	0	0	0	33901	21	23	0	0	0	0	0	0	0	0	0	0	0	0	0	0	24053	0	6	0	0	0	0	0	0	0	0	0	0	0	0	0	0	29507	2	3	0	0	0	0	0	0	0
	G	20	0	0	0	33896	23	22	0	3	1	0	0	0	0	0	0	0	0	0	0	0	24056	1	2	0	0	0	0	0	0	0	0	0	0	0	0	0	0	29506	5	1	0	0	0	0	0	0	0
	A	21	1	1	0	1787	32069	79	6	1	0	1	0	0	2	0	0	0	0	0	0	0	241	23815	3	0	0	0	0	0	0	0	0	0	0	0	0	0	0	337	29163	9	3	0	0	0	0	0	0
	A	22	0	0	0	32212	527	1175	24	2	4	1	0	0	0	0	0	0	0	0	0	0	23898	52	107	0	0	0	2	0	0	0	0	0	0	0	0	0	0	29310	63	138	1	0	0	0	0	0	0
ES76i	A	23	0	1	1	32783	936	168	50	6	0	2	0	0	0	0	0	0	0	0	0	0	23918	119	16	5	1	0	0	0	0	0	0	0	0	0	0	0	0	29286	187	30	8	1	0	0	0	0	0
	A	24	0	0	0	33204	503	35	144	17	3	24	3	12	0	0	0	0	0	0	0	0	23986	56	5	10	0	1	0	0	1	0	0	0	0	0	0	0	0	29405	69	11	24	0	2	1	0	0	0
	A	25	0	0	0	32238	424	63	104	958	144	6	3	2	3	0	0	0	0	0	0	0	23880	57	5	11	97	8	1	0	0	0	0	0	0	0	0	0	0	29298	73	7	9	113	12	0	0	0	0
ES75i	G	26	0	4	4	31431	173	1089	58	785	392	16	1	0	0	0	0	0	0	0	0	0	23765	22	114	9	90	55	4	0	0	0	0	0	0	0	0	0	0	29128	21	145	14	128	72	4	0	0	0
ES74i	G	27	0	8	8	31275	113	46	44	7	1005	58	59	1192	33	6	18	59	25	4	1	0	23751	39	5	4	1	88	10	10	144	0	0	1	3	2	1	0	0	29095	55	9	7	1	103	9	13	195	4
	C	28	0	0	0	33767	116	41	10	10	0	0	0	0	1	0	0	0	0	0	0	0	24025	28	3	0	2	0	1	0	0	0	0	0	0	0	0	0	0	29450	57	2	1	1	0	1	0	0	0
	G	29	0	0	0	33911	24	5	4	1	0	0	0	0	0	0	0	0	0	0	0	0	24056	3	0	0	0	0	0	0	0	0	0	0	0	0	0	0	0	29504	5	0	3	0	0	0	0	0	0
ES73i	A	30	0	1	1	31266	2556	40	48	21	6	8	0	0	0	0	0	0	0	0	0	0	23785	262	5	5	1	0	1	0	0	0	0	0	0	0	0	0	0	29142	357	6	4	0	0	3	0	0	0
ES72i	G	31	0	1	1	31219	2582	65	36	11	7	1	1	0	0	5	15	3	0	0	0	0	23754	283	15	2	2	2	1	0	0	0	0	0	0	0	0	0	0	29095	391	11	8	5	1	1	0	0	0
ES71i	G	32	0	1	1	31271	2521	87	37	18	6	4	1	0	0	0	0	0	0	0	0	0	23774	256	8	20	1	0	0	0	0	0	0	0	0	0	0	0	0	29125	333	8	44	2	0	0	0	0	0
	A	33	0	0	0	33603	189	85	44	3	7	13	0	1	0	0	0	0	0	0	0	0	23938	82	23	10	3	1	1	0	1	0	0	0	0	0	0	0	0	29375	79	47	9	2	0	0	0	0	0
ES70d	G	34	6	5	-1	61	174	217	88	80	2465	30829	31	0	0	0	0	0	0	0	0	0	19	72	83	24	23	307	23489	40	2	0	0	0	0	0	0	0	0	31	80	107	39	27	388	28811	29	0	0
ES69i	A	35	0	1	1	31092	2758	37	20	12	13	9	0	4	0	0	0	0	0	0	0	0	23707	338	2	5	3	2	1	1	0	0	0	0	0	0	0	0	0	29050	444	6	4	2	1	5	0	0	0
ES68i	G	36	0	1	1	31084	2733	45	51	20	5	6	0	0	0	0	1	0	0	0	0	0	23700	343	7	6	3	0	0	0	0	0	0	0	0	0	0	0	0	29051	440	11	4	2	4	0	0	0	0
ES67d	G	37	1	0	-1	2772	30967	58	114	8	8	15	2	0	1	0	0	0	0	0	0	0	409	23616	5	23	1	1	3	0	1	0	0	0	0	0	0	0	0	544	28922	8	31	2	1	2	0	0	0
ES66i	G	38	0	2	2	31059	53	2723	27	7	0	8	10	57	0	0	0	1	0	0	0	0	23669	26	343	4	0	1	0	7	9	0	0	0	0	0	0	0	0	29009	32	436	7	0	3	0	2	23	0
ES65i	G	39	0	2	2	30945	202	2718	39	15	24	2	0	0	0	0	0	0	0	0	0	0	23643	70	335	3	3	5	0	0	0	0	0	0	0	0	0	0	0	28971	91	431	8	1	8	1	1	0	0
ES64i	A	40	0	3	3	30998	119	126	2655	10	5	32	0	0	0	0	0	0	0	0	0	0	23678	44	27	302	2	0	6	0	0	0	0	0	0	0	0	0	0	29008	66	26	406	3	0	3	0	0	0
	C	41	0	0	0	33523	202	186	27	4	3	0	0	0	0	0	0	0	0	0	0	0	23935	58	62	3	0	1	0	0	0	0	0	0	0	0	0	0	0	29395	58	50	7	2	0	0	0	0	0
ES63d	G	42	1	0	-1	3730	30186	18	11	0	0	0	0	0	0	0	0	0	0	0	0	0	1047	23009	2	0	1	0	0	0	0	0	0	0	0	0	0	0	0	1386	28124	2	0	0	0	0	0	0	0
ES62i	G	43	0	4	4	30698	271	135	194	2622	21	0	4	0	0	0	0	0	0	0	0	0	23693	64	29	19	253	1	0	0	0	0	0	0	0	0	0	0	0	29093	57	33	26	303	0	0	0	0	0
ES61i	A	44	0	4	4	30649	236	186	264	2600	7	2	0	1	0	0	0	0	0	0	0	0	23559	127	68	54	251	0	0	0	0	0	0	0	0	0	0	0	0	28931	107	112	69	292	1	0	0	0	0
ES60i	G	45	0	3	3	30030	156	130	3419	194	15	1	0	0	0	0	0	0	0	0	0	0	23056	104	22	849	26	2	0	0	0	0	0	0	0	0	0	0	0	28249	129	27	1069	37	1	0	0	0	0
ES59i	A	46	0	4	4	29926	17	113	1098	2784	5	1	0	0	1	0	0	0	0	0	0	0	23059	11	9	616	361	3	0	0	0	0	0	0	0	0	0	0	0	28277	24	26	786	399	0	0	0	0	0
ES58i	G	47	0	1	1	29887	2850	28	31	1146	0	3	0	0	0	0	0	0	0	0	0	0	23074	387	11	10	577	0	0	0	0	0	0	0	0	0	0	0	0	28324	445	22	19	700	2	0	0	0	0
ES57i	A	48	0	2	2	29869	211	2859	29	974	3	0	0	0	0	0	0	0	0	0	0	0	23138	128	367	20	406	0	0	0	0	0	0	0	0	0	0	0	0	28425	112	414	29	532	0	0	0	0	0
ES56i	A	49	0	2	2	29823	42	4047	23	8	1	0	0	1	0	0	0	0	0	0	0	0	23228	19	809	2	1	0	0	0	0	0	0	0	0	0	0	0	0	28524	28	959	1	0	0	0	0	0	0
ES55i	A	50	0	1	1	29832	3854	248	2	8	0	0	1	0	0	0	0	0	0	0	0	0	23256	700	91	9	3	0	0	0	0	0	0	0	0	0	0	0	0	28547	866	97	2	0	0	0	0	0	0
ES54i	G	51	0	1	1	29839	3910	127	17	52	0	0	0	0	0	0	0	0	0	0	0	0	23099	928	23	3	6	0	0	0	0	0	0	0	0	0	0	0	0	28249	1241	17	0	5	0	0	0	0	0
	A	52	0	0	0	33590	39	222	16	2	69	6	0	1	0	0	0	0	0	0	0	0	23952	12	83	1	0	9	2	0	0	0	0	0	0	0	0	0	0	29419	13	76	0	0	4	0	0	0	0
	G	53	0	0	0	33798	43	96	5	1	1	1	0	0	0	0	0	0	0	0	0	0	24046	2	11	0	0	0	0	0	0	0	0	0	0	0	0	0	0	29502	3	7	0	0	0	0	0	0	0
ES53i	C	54	0	1	1	31444	2491	6	3	1	0	0	0	0	0	0	0	0	0	0	0	0	23738	321	0	0	0	0	0	0	0	0	0	0	0	0	0	0	0	29182	329	0	0	1	0	0	0	0	0
	C	55	0	0	0	33919	15	11	0	0	0	0	0	0	0	0	0	0	0	0	0	0	24046	4	9	0	0	0	0	0	0	0	0	0	0	0	0	0	0	29505	4	3	0	0	0	0	0	0	0
	G	56	0	0	0	32564	1372	7	1	1	0	0	0	0	0	0	0	0	0	0	0	0	23774	283	2	0	0	0	0	0	0	0	0	0	0	0	0	0	0	29117	395	0	0	0	0	0	0	0	0
ES52d	C	57	2	0	-2	4414	184	29345	1	0	0	1	0	0	0	0	0	0	0	0	0	0	1164	46	22848	1	0	0	0	0	0	0	0	0	0	0	0	0	0	1524	47	27941	0	0	0	0	0	0	0
	G	58	0	0	0	33914	30	1	0	0	0	0	0	0	0	0	0	0	0	0	0	0	24058	1	0	0	0	0	0	0	0	0	0	0	0	0	0	0	0	29510	1	1	0	0	0	0	0	0	0
	A	59	0	0	0	33742	111	34	39	1	10	6	1	1	0	0	0	0	0	0	0	0	24031	23	2	2	1	0	0	0	0	0	0	0	0	0	0	0	0	29472	30	8	1	1	0	0	0	0	0
ES51i	G	60	0	2	2	29473	397	4020	48	1	0	4	2	0	0	0	0	0	0	0	0	0	22883	120	1054	2	0	0	0	0	0	0	0	0	0	0	0	0	0	27981	155	1370	3	0	0	3	0	0	0
	C	61	0	0	0	33751	153	25	14	1	1	0	0	0	0	0	0	0	0	0	0	0	24033	23	3	0	0	0	0	0	0	0	0	0	0	0	0	0	0	29466	38	4	4	0	0	0	0	0	0
	C	62	0	0	0	33934	9	2	0	0	0	0	0	0	0	0	0	0	0	0	0	0	24058	1	0	0	0	0	0	0	0	0	0	0	0	0	0	0	0	29509	2	1	0	0	0	0	0	0	0
	C	63	0	0	0	33834	108	2	0	0	0	0	1	0	0	0	0	0	0	0	0	0	24044	15	0	0	0	0	0	0	0	0	0	0	0	0	0	0	0	29480	32	0	0	0	0	0	0	0	0
	A	64	0	0	0	33748	183	6	8	0	0	0	0	0	0	0	0	0	0	0	0	0	24029	29	1	0	0	0	0	0	0	0	0	0	0	0	0	0	0	29466	44	2	0	0	0	0	0	0	0
	G	65	0	0	0	33407	148	252	124	5	6	1	0	1	0	0	0	0	1	0	0	0	23933	22	87	16	0	1	0	0	0	0	0	0	0	0	0	0	0	29363	17	111	18	0	2	0	0	1	0
ES50i	C	66	0	2	2	30366	154	3388	22	3	9	0	0	0	2	1	0	0	0	0	0	0	23324	18	714	3	0	0	0	0	0	0	0	0	0	0	0	0	0	28557	12	939	2	0	2	0	0	0	0
	C	67	0	0	0	32808	1114	23	0	0	0	0	0	0	0	0	0	0	0	0	0	0	23661	394	4	0	0	0	0	0	0	0	0	0	0	0	0	0	0	29000	507	5	0	0	0	0	0	0	0
	G	68	0	0	0	32872	1010	34	29	0	0	0	0	0	0	0	0	0	0	0	0	0	23654	392	10	3	0	0	0	0	0	0	0	0	0	0	0	0	0	29004	502	2	4	0	0	0	0	0	0
	G	69	0	0	0	31091	442	2193	83	48	85	1	2	0	0	0	0	0	0	0	0	0	22969	86	988	7	5	4	0	0	0	0	0	0	0	0	0	0	0	28475	75	949	4	3	6	0	0	0	0
ES49i	A	70	0	1	1	28368	5138	351	51	20	11	4	2	0	0	0	0	0	0	0	0	0	22776	1252	22	1	0	6	2	0	0	0	0	0	0	0	0	0	0	27925	1561	19	4	3	0	0	0	0	0
	A	71	0	0	0	31180	329	229	216	1931	45	13	1	1	0	0	0	0	0	0	0	0	22962	31	42	41	974	9	0	0	0	0	0	0	0	0	0	0	0	28413	37	74	23	960	5	0	0	0	0
	C	72	0	0	0	33487	417	29	7	0	5	0	0	0	0	0	0	0	0	0	0	0	23986	65	7	0	0	0	1	0	0	0	0	0	0	0	0	0	0	29439	68	4	1	0	0	0	0	0	0
	C	73	0	0	0	33778	142	20	2	0	3	0	0	0	0	0	0	0	0	0	0	0	24049	9	1	0	0	0	0	0	0	0	0	0	0	0	0	0	0	29492	18	0	2	0	0	0	0	0	0
	G	74	0	0	0	33793	53	93	4	2	0	0	0	0	0	0	0	0	0	0	0	0	23992	16	51	0	0	0	0	0	0	0	0	0	0	0	0	0	0	29441	15	56	0	0	0	0	0	0	0
	A	75	0	0	0	32957	387	183	103	34	269	11	1	0	0	0	0	0	0	0	0	0	23905	56	11	11	7	67	0	0	2	0	0	0	0	0	0	0	0	29341	54	18	8	6	82	2	0	1	0
	C	76	0	0	0	33099	451	107	255	28	2	0	3	0	0	0	0	0	0	0	0	0	23982	43	21	11	2	0	0	0	0	0	0	0	0	0	0	0	0	29433	54	12	12	1	0	0	0	0	0
	G	77	0	0	0	33806	108	14	16	0	0	0	1	0	0	0	0	0	0	0	0	0	24052	4	3	0	0	0	0	0	0	0	0	0	0	0	0	0	0	29503	8	0	1	0	0	0	0	0	0
ES48i	G	78	0	1	1	28306	4959	252	375	22	23	5	0	2	0	1	0	0	0	0	0	0	22798	1184	32	44	0	1	0	0	0	0	0	0	0	0	0	0	0	27939	1492	27	53	1	0	0	0	0	0
ES47i	A	79	0	1	1	27825	4458	856	700	24	51	11	10	1	0	2	2	4	1	0	0	0	22625	1169	187	71	4	2	0	1	0	0	0	0	0	0	0	0	0	27851	1422	164	70	2	3	0	0	0	0
ES46i	G	80	0	2	2	27431	2174	4088	153	19	19	2	43	2	13	1	0	0	0	0	0	0	21616	1350	1079	11	1	1	0	0	1	0	0	0	0	0	0	0	0	26809	1332	1361	9	0	0	0	1	0	0
ES45i	A	81	0	1	1	28588	4878	263	122	40	31	11	2	10	0	0	0	0	0	0	0	0	22839	1194	21	3	2	0	0	0	0	0	0	0	0	0	0	0	0	27991	1500	12	6	2	1	0	0	0	0
ES44i	G	82	0	1	1	22714	9949	601	368	48	60	199	4	1	1	0	0	0	0	0	0	0	20289	3685	57	11	1	4	11	1	0	0	0	0	0	0	0	0	0	25246	4165	66	16	4	3	11	1	0	0
	C	83	0	0	0	32690	830	165	249	7	1	1	2	0	0	0	0	0	0	0	0	0	23958	76	8	16	1	0	0	0	0	0	0	0	0	0	0	0	0	29400	90	14	7	0	1	0	0	0	0
ES43d	C	84	2	0	-2	12490	884	20537	27	7	0	0	0	0	0	0	0	0	0	0	0	0	4439	106	19511	3	0	0	0	0	0	0	0	0	0	0	0	0	0	5390	171	23948	3	0	0	0	0	0	0
ES42d	G	85	4	0	-4	13947	635	118	132	19099	12	1	1	0	0	0	0	0	0	0	0	0	5478	37	35	81	18420	7	0	1	0	0	0	0	0	0	0	0	0	6970	60	35	87	22345	13	0	2	0	0
ES41i	A	86	0	1	1	23006	9155	1493	105	163	19	2	1	1	0	0	0	0	0	0	0	0	20548	3342	113	32	20	4	0	0	0	0	0	0	0	0	0	0	0	25607	3770	98	21	10	4	2	0	0	0
ES40i	A	87	0	4	4	22236	1001	1491	547	8595	67	6	1	0	1	0	0	0	0	0	0	0	20093	147	203	440	3169	6	0	0	1	0	0	0	0	0	0	0	0	25039	120	197	563	3587	6	0	0	0	0
ES39i	A	88	1	3	2	2876	20917	572	9227	280	45	22	3	1	1	0	0	0	0	1	0	0	1760	18592	120	3535	48	1	1	2	0	0	0	0	0	0	0	0	0	2811	22471	109	4078	36	4	3	0	0	0
ES38i	A	89	0	1	1	19727	10391	2025	1366	193	135	23	75	8	2	0	0	0	0	0	0	0	19685	3740	456	140	12	15	2	8	1	0	0	0	0	0	0	0	0	24770	4250	323	124	19	6	8	11	1	0
ES37i	A	90	0	1	1	20920	9961	1540	450	332	278	110	99	248	4	1	1	1	0	0	0	0	19699	3838	272	55	24	22	23	15	110	0	1	0	0	0	0	0	0	24770	4265	257	50	20	40	13	15	80	2
	A	91	0	0	0	28553	1298	2542	899	287	93	260	11	1	1	0	0	0	0	0	0	0	23060	242	491	112	42	10	98	2	2	0	0	0	0	0	0	0	0	28721	209	380	69	39	14	76	2	1	1
ES36i	G	92	0	4	4	19836	3165	827	1841	8006	153	69	7	10	8	16	5	2	0	0	0	0	19844	400	306	283	3214	2	7	1	1	0	1	0	0	0	0	0	0	24833	349	317	229	3776	3	0	3	0	0
ES35i	G	93	0	3	3	21787	2418	863	8163	529	155	16	10	1	1	1	0	1	0	0	0	0	20232	310	234	3171	71	33	4	2	1	1	0	0	0	0	0	0	0	25194	328	237	3644	70	33	3	1	2	0
	G	94	0	0	0	29291	3050	431	610	404	73	44	39	1	2	0	0	0	0	0	0	0	22961	825	53	147	50	8	4	10	1	0	0	0	0	0	0	0	0	28584	663	75	130	45	11	1	3	0	0
	A	95	0	0	0	28516	2548	1644	411	150	81	61	88	60	349	33	4	0	0	0	0	0	22907	488	349	51	11	17	23	59	19	116	14	5	0	0	0	0	0	28543	465	269	55	15	17	22	40	8	77
ES34i	G	96	0	1	1	21915	9306	1681	849	87	40	40	9	7	9	1	1	0	0	0	0	0	19429	3916	621	68	6	11	5	0	0	3	0	0	0	0	0	0	0	23954	4836	640	51	4	22	4	0	0	1
ES33i	G	97	0	2	2	16675	1446	11430	2853	959	172	221	175	8	3	1	2	0	0	0	0	0	16855	792	5841	299	181	35	34	20	2	0	0	0	0	0	0	0	0	21017	892	7124	259	164	22	16	17	1	0
	C	98	0	0	0	27053	4659	320	1797	71	20	7	17	0	1	0	0	0	0	0	0	0	21369	2026	96	549	13	3	1	1	0	1	0	0	0	0	0	0	0	26731	2137	105	510	18	4	1	6	0	0
	G	99	0	0	0	29136	1720	55	2992	33	8	1	0	0	0	0	0	0	0	0	0	0	22329	545	21	1152	8	3	0	0	0	0	1	0	0	0	0	0	0	27735	520	14	1241	2	0	0	0	0	0
ES32i	G	100	0	2	2	15433	6240	11111	259	497	62	26	13	266	34	2	1	1	0	0	0	0	16114	2399	4802	59	491	19	7	6	150	9	3	0	0	0	0	0	0	20017	2445	6204	63	560	20	9	12	171	11
ES31i	G	101	0	8	8	15242	5273	1958	201	516	119	216	275	9923	208	10	2	2	0	0	0	0	16067	2078	1062	86	280	67	67	117	4153	82	0	0	0	0	0	0	0	20021	2093	1168	67	326	82	85	173	5390	101
ES30i	G	102	0	2	2	15684	321	16069	827	978	48	8	6	2	2	0	0	0	0	0	0	0	16117	290	6502	222	888	30	7	2	1	0	0	0	0	0	0	0	0	20328	406	7625	226	874	41	7	2	3	0
ES29i	A	103	0	4	4	19591	1513	614	592	11527	42	56	6	3	1	0	0	0	0	0	0	0	17706	1157	380	224	4558	20	12	2	0	0	0	0	0	0	0	0	0	22061	1197	432	270	5530	9	13	0	0	0
ES28i	G	104	0	2	2	16434	5078	11589	711	35	29	10	44	11	1	1	1	1	0	0	0	0	17450	1804	4673	111	10	2	0	8	1	0	0	0	0	0	0	0	0	22308	1658	5447	86	5	2	2	3	1	0
	G	105	0	0	0	27535	1415	320	4526	62	63	3	21	0	0	0	0	0	0	0	0	0	22083	343	190	1423	9	9	0	2	0	0	0	0	0	0	0	0	0	27820	267	218	1191	5	8	1	2	0	0
ES27i	A	106	0	3	3	18918	729	752	12790	89	649	14	1	3	0	0	0	0	0	0	0	0	17790	197	363	5624	11	73	1	0	0	0	0	0	0	0	0	0	0	22712	227	396	6113	6	55	2	0	1	0
	G	107	0	0	0	26700	5430	1429	191	71	64	13	9	9	27	2	0	0	0	0	0	0	20963	1599	1438	33	17	6	0	1	0	2	0	0	0	0	0	0	0	26060	1467	1931	30	13	6	2	1	0	2
ES26i	A	108	0	2	2	17936	2085	13625	184	79	12	7	15	1	1	0	0	0	0	0	0	0	14767	2004	7237	34	12	1	3	1	0	0	0	0	0	0	0	0	0	17888	2807	8764	38	9	3	1	2	0	0
ES25i	G	109	0	1	1	12851	18729	1362	783	142	25	10	7	36	0	0	0	0	0	0	0	0	13620	9121	1208	82	14	5	2	2	5	0	0	0	0	0	0	0	0	16978	10646	1797	70	12	2	0	3	4	0
ES24d	C	110	3	1	-2	2954	19690	406	10829	32	24	8	1	0	0	1	0	0	0	0	0	0	2165	9452	81	12356	3	1	0	0	1	0	0	0	0	0	0	0	0	2722	10931	61	15794	1	1	1	0	0	1
	A	111	0	0	0	33601	228	79	35	0	2	0	0	0	0	0	0	0	0	0	0	0	23997	30	30	2	0	0	0	0	0	0	0	0	0	0	0	0	0	29442	26	39	4	0	0	0	0	1	0
ES23i	A	112	0	2	2	12630	2428	18470	205	120	51	26	14	1	0	0	0	0	0	0	0	0	14920	1122	7956	34	16	10	0	0	1	0	0	0	0	0	0	0	0	19284	1302	8871	26	13	8	3	5	0	0
Es22i	A	113	0	3	3	12510	1981	774	17855	613	139	40	21	2	1	0	2	5	2	0	0	0	13472	1009	335	9124	86	30	3	0	0	0	0	0	0	0	0	0	0	16896	1400	365	10727	86	35	3	0	0	0
Es21i	A	114	0	2	2	10840	1402	19425	1230	270	129	370	33	225	6	0	7	8	0	0	0	0	12779	328	9896	963	25	25	25	4	10	1	0	1	2	0	0	0	0	16287	322	11357	1487	17	15	16	5	6	0
ES20i	A	115	0	1	1	10439	18999	1926	1220	801	262	138	139	11	1	2	1	4	2	0	0	0	13663	8781	1123	280	151	26	22	4	3	3	0	2	1	0	0	0	0	17338	10126	1560	287	145	33	14	3	2	0
	G	116	0	0	0	27305	2235	1793	687	718	426	79	281	281	39	18	24	54	4	1	0	0	21538	1478	504	126	184	80	32	49	41	2	4	4	12	3	1	1	0	26774	1772	490	129	156	56	25	52	41	6
	A	117	0	0	0	28368	2084	671	1027	552	279	279	106	55	57	61	125	238	40	3	0	0	22345	964	224	181	109	50	31	13	9	15	17	25	62	14	0	0	0	27989	868	217	167	76	58	27	12	6	1
ES19d	G	118	3	0	-3	20012	2882	640	9369	147	409	409	25	15	11	5	9	9	3	0	0	0	11299	1009	229	11360	28	54	64	1	2	2	3	5	3	0	0	0	0	13506	961	229	14652	35	47	55	6	2	4
	G	119	0	0	0	27738	3194	637	1471	447	413	20	4	18	3	0	0	0	0	0	0	0	22546	799	338	260	69	38	4	4	0	1	0	0	0	0	0	0	0	28160	692	319	237	63	30	6	3	2	0
	G	120	0	0	0	28017	2099	1075	1909	165	626	14	33	1	4	0	2	0	0	0	0	0	22266	1156	195	293	33	99	6	10	0	1	0	0	0	0	0	0	0	27703	1258	179	248	32	73	5	14	0	0
	G	121	1	1	0	2018	26822	2107	907	451	1522	69	32	8	8	1	0	0	0	0	0	0	1108	21038	1340	234	111	197	15	15	0	1	0	0	0	0	0	0	0	1417	26333	1185	290	94	166	15	8	3	1
	G	122	0	0	0	27108	4222	1364	644	144	411	29	18	3	1	1	0	0	0	0	0	0	21431	1684	737	108	16	50	13	19	0	1	0	0	0	0	0	0	0	26840	1702	782	85	16	68	9	10	0	0
ES18i	G	123	0	1	1	9607	22963	369	401	82	77	127	313	5	1	0	0	0	0	0	0	0	11570	11955	233	179	11	16	35	59	0	1	0	0	0	0	0	0	0	14803	14201	256	164	14	20	14	39	0	1
	G	124	0	0	0	27713	5168	180	137	415	59	18	245	6	4	0	0	0	0	0	0	0	21564	2016	51	78	145	10	11	182	0	2	0	0	0	0	0	0	0	27160	1911	76	79	120	9	13	141	3	0
ES17i	G	125	0	4	4	10395	430	4471	422	17789	207	221	6	3	0	0	0	1	0	0	0	0	10543	309	2100	554	10468	55	29	0	1	0	0	0	0	0	0	0	0	13476	300	1971	1026	12635	56	46	2	0	0
ES16i	G	126	0	2	2	7977	730	25189	37	5	0	1	6	0	0	0	0	0	0	0	0	0	10064	606	13363	21	2	2	0	1	0	0	0	0	0	0	0	0	0	12911	687	15893	17	2	0	1	1	0	0
	A	127	0	0	0	26350	2241	3231	1853	5	254	6	3	0	0	0	0	2	0	0	0	0	20794	1345	791	930	11	183	2	2	0	0	0	1	0	0	0	0	0	26400	1160	823	968	10	147	3	0	1	0
ES15i	A	128	0	3	3	7488	4154	156	22077	14	22	33	1	0	0	0	0	0	0	0	0	0	9847	2215	104	11869	5	12	6	1	0	0	0	0	0	0	0	0	0	12638	2068	108	14681	1	14	2	0	0	0
	C	129	0	0	0	31654	1904	177	195	13	1	0	0	0	0	1	0	0	0	0	0	0	21379	2163	207	306	2	1	0	0	0	0	1	0	0	0	0	0	0	26129	2726	270	378	9	0	0	0	0	0
	C	130	0	0	0	33076	649	124	1	95	0	0	0	0	0	0	0	0	0	0	0	0	23550	285	137	3	83	1	0	0	0	0	0	0	0	0	0	0	0	29014	267	154	2	75	0	0	0	0	0
	C	131	0	0	0	33663	153	119	9	1	0	0	0	0	0	0	0	0	0	0	0	0	23955	67	34	0	3	0	0	0	0	0	0	0	0	0	0	0	0	29409	76	25	2	0	0	0	0	0	0
ES14d	G	132	3	0	-3	24944	2548	142	6293	6	5	1	2	2	1	0	0	1	0	0	0	0	18005	1653	99	4295	5	1	1	0	0	0	0	0	0	0	0	0	0	22705	1768	105	4925	7	2	0	0	0	0
ES13d	G	133	4	0	-4	23074	1040	1472	425	7914	17	1	0	0	2	0	0	0	0	0	0	0	15722	2359	865	436	4672	5	0	0	0	0	0	0	0	0	0	0	0	19873	3334	742	502	5057	1	2	1	0	0
ES12i	G	134	0	1	1	8516	18234	243	6937	8	7	0	0	0	0	0	0	0	0	0	0	0	9502	10490	152	3906	5	4	0	0	0	0	0	0	0	0	0	0	0	12340	12661	154	4347	6	4	0	0	0	0
ES11d	A	135	2	1	-1	527	22922	2966	172	7332	7	14	3	2	0	0	0	0	0	0	0	0	1177	15605	3103	129	4036	2	3	3	1	0	0	0	0	0	0	0	0	2460	19151	3292	207	4395	1	5	1	0	0
	A	136	0	0	0	21158	12646	49	54	5	7	6	0	0	3	17	0	0	0	0	0	0	14539	9457	21	28	6	1	1	0	2	1	2	1	0	0	0	0	0	18261	11187	20	34	7	2	0	1	0	0
	A	137	0	0	0	26130	293	7491	23	3	1	1	3	0	0	0	0	0	0	0	0	0	19902	222	3901	17	11	2	0	3	0	0	1	0	0	0	0	0	0	25058	260	4165	14	12	2	0	0	1	0
	G	138	0	0	0	26209	175	7512	6	37	6	0	0	0	0	0	0	0	0	0	0	0	20135	189	3714	10	11	0	0	0	0	0	0	0	0	0	0	0	0	25319	226	3940	6	20	1	0	0	0	0
ES10i	A	139	0	1	1	8092	25782	39	22	5	0	1	4	0	0	0	0	0	0	0	0	0	10095	13936	12	11	3	1	0	1	0	0	0	0	0	0	0	0	0	13290	16176	30	11	4	0	0	0	1	0
ES9i	A	140	0	2	2	2840	5576	25502	12	4	5	0	0	1	2	1	1	1	0	0	0	0	4616	5761	13659	17	5	1	0	0	0	0	0	0	0	0	0	0	0	6207	7438	15853	11	1	1	0	0	0	0
ES8i	A	141	0	1	1	9865	17976	5131	864	107	1	1	0	0	0	0	0	0	0	0	0	0	8243	10026	5382	352	56	0	0	0	0	0	0	0	0	0	0	0	0	10278	11979	6852	337	65	1	0	0	0	0
	C	142	0	0	0	20411	706	12768	16	38	3	3	0	0	0	0	0	0	0	0	0	0	12004	428	11592	18	15	1	1	0	0	0	0	0	0	0	0	0	0	13952	679	14847	22	11	1	0	0	0	0
	A	143	0	0	0	33917	18	9	1	0	0	0	0	0	0	0	0	0	0	0	0	0	24047	6	5	0	1	0	0	0	0	0	0	0	0	0	0	0	0	29486	24	2	0	0	0	0	0	0	0
ES7d	C	144	1	0	-1	32439	1476	22	0	8	0	0	0	0	0	0	0	0	0	0	0	0	22481	1564	10	1	3	0	0	0	0	0	0	0	0	0	0	0	0	27967	1531	10	1	3	0	0	0	0	0
	G	145	0	0	0	33856	76	13	0	0	0	0	0	0	0	0	0	0	0	0	0	0	24019	31	7	0	1	0	0	1	0	0	0	0	0	0	0	0	0	29466	42	4	0	0	0	0	0	0	0
ES6d	A	146	3	1	-2	7523	23808	1518	1055	39	0	2	0	0	0	0	0	0	0	0	0	0	3711	18433	590	1304	21	0	0	0	0	0	0	0	0	0	0	0	0	4054	23664	578	1195	21	0	0	0	0	0
ES5i	G	147	0	2	2	2302	78	31559	1	0	1	0	0	4	0	0	0	0	0	0	0	0	1869	136	22037	5	0	1	0	1	10	0	0	0	0	0	0	0	0	1756	227	27511	3	1	0	0	0	14	0
ES4i	A	148	0	1	1	2227	31708	10	0	0	0	0	0	0	0	0	0	0	0	0	0	0	1749	22301	6	2	1	0	0	0	0	0	0	0	0	0	0	0	0	1633	27864	9	5	1	0	0	0	0	0
	A	149	0	0	0	33929	8	8	0	0	0	0	0	0	0	0	0	0	0	0	0	0	24048	8	3	0	0	0	0	0	0	0	0	0	0	0	0	0	0	29496	9	7	0	0	0	0	0	0	0
	G	150	0	0	0	33931	1	10	1	2	0	0	0	0	0	0	0	0	0	0	0	0	24052	0	5	2	0	0	0	0	0	0	0	0	0	0	0	0	0	29485	8	18	0	1	0	0	0	0	0
ES3i	A	151	0	2	2	696	8	33241	0	0	0	0	0	0	0	0	0	0	0	0	0	0	1040	13	23005	1	0	0	0	0	0	0	0	0	0	0	0	0	0	927	15	28569	1	0	0	0	0	0	0
	G	152	0	0	0
	A	153	0	0	0
ES2d	A	154	4	3	-1
	G	155	0	0	0
	A	156	0	0	0
ES1i	A	157	0	1	1
	A	158	1	1	0
	A	159	0	0	0
	G	160	0	0	0
	A	161	0	0	0
	A	162	1	1	0
3' end	G	163	1	1	0
Total
[truncated: 7 more columns]

## Sheet: RPS12_F1-RNAi mtRNA 0-4 Day R2
RPS12_KH2F1-RNAi_mtRNA_0-4 Day_R2
						J10 - F1 RNAi 0Day mtRNA - Bio Rep																	J11 - F1 RNAi 3Day mtRNA - Bio Rep																	J12 - F1 RNAi 4Day mtRNA - Bio Rep
			no of Ts present before that position			# reads with indicated # Ts present before that position																	# reads with indicated # Ts present before that position																	# reads with indicated # Ts present before that position
	sequence	T-stripped	pre-edited	edited	editing events; del = -; ins = +	0	1	2	3	4	5	6	7	8	9	10	11	12	13	14	15	16	0	1	2	3	4	5	6	7	8	9	10	11	12	13	14	15	16	0	1	2	3	4	5	6	7	8	9
	C	1
5' end	A	2
	A	3
	A	4
	C	5
	A	6
	C	7
	G	8
	A	9
	A	10
	A	11
	C	12
	A	13
	A	14
	A	15
	C	16	0	0	0	40794	0	0	0	0	0	0	0	0	0	0	0	0	0	0	0	0	41488	0	0	0	0	0	0	0	0	0	0	0	0	0	0	0	0	46759	0	0	0	0	0	0	0	0	0
	A	17	1	1	0	101	40691	0	0	0	2	0	0	0	0	0	0	0	0	0	0	0	79	41409	0	0	0	0	0	0	0	0	0	0	0	0	0	0	0	36	46723	0	0	0	0	0	0	0	0
	A	18	0	0	0	40778	3	8	4	1	0	0	0	0	0	0	0	0	0	0	0	0	41483	2	2	0	0	1	0	0	0	0	0	0	0	0	0	0	0	46757	0	1	1	0	0	0	0	0	0
	A	19	0	0	0	40751	22	18	2	0	1	0	0	0	0	0	0	0	0	0	0	0	41477	5	6	0	0	0	0	0	0	0	0	0	0	0	0	0	0	46753	1	5	0	0	0	0	0	0	0
	G	20	0	0	0	40759	17	18	0	0	0	0	0	0	0	0	0	0	0	0	0	0	41475	6	4	2	0	0	0	0	0	1	0	0	0	0	0	0	0	46753	5	1	0	0	0	0	0	0	0
	A	21	1	1	0	1480	39200	100	7	2	0	3	0	1	1	0	0	0	0	0	0	0	705	40755	21	6	0	0	0	0	1	0	0	0	0	0	0	0	0	379	46358	21	1	0	0	0	0	0	0
	A	22	0	0	0	39345	461	964	17	2	3	2	0	0	0	0	0	0	0	0	0	0	40948	181	355	2	0	0	1	0	1	0	0	0	0	0	0	0	0	46523	91	142	2	0	0	1	0	0	0
ES76i	A	23	0	1	1	39723	859	159	43	7	3	0	0	0	0	0	0	0	0	0	0	0	41037	374	56	19	1	1	0	0	0	0	0	0	0	0	0	0	0	46527	197	27	8	0	0	0	0	0	0
	A	24	0	0	0	40081	463	41	149	10	10	16	2	22	0	0	0	0	0	0	0	0	41251	161	21	51	2	0	0	0	2	0	0	0	0	0	0	0	0	46629	94	7	25	4	0	0	0	0	0
	A	25	0	0	0	39366	372	56	71	803	106	11	3	0	5	1	0	0	0	0	0	0	40978	129	13	28	301	37	1	0	0	0	1	0	0	0	0	0	0	46520	75	6	15	126	11	2	1	1	2
ES75i	G	26	0	4	4	38634	124	850	81	739	347	14	3	1	0	0	0	0	0	1	0	0	40623	59	350	28	304	116	8	0	0	0	0	0	0	0	0	0	0	46311	29	172	7	172	67	1	0	0	0
ES74i	G	27	0	8	8	38451	113	56	43	12	751	48	52	1106	35	17	16	59	27	5	2	1	40546	107	22	21	8	267	20	23	417	13	2	8	17	12	3	1	1	46266	85	13	21	2	117	5	15	208	4
	C	28	0	0	0	40611	112	39	18	10	1	3	0	0	0	0	0	0	0	0	0	0	41376	88	14	0	6	3	1	0	0	0	0	0	0	0	0	0	0	46676	70	9	2	2	0	0	0	0	0
	G	29	0	0	0	40757	22	8	7	0	0	0	0	0	0	0	0	0	0	0	0	0	41472	5	9	2	0	0	0	0	0	0	0	0	0	0	0	0	0	46747	7	5	0	0	0	0	0	0	0
ES73i	A	30	0	1	1	38453	2202	44	46	29	6	12	1	0	0	0	0	1	0	0	0	0	40645	811	13	13	4	1	1	0	0	0	0	0	0	0	0	0	0	46339	404	7	3	5	0	1	0	0	0
ES72i	G	31	0	1	1	38385	2234	84	35	28	3	0	3	2	2	0	14	3	1	0	0	0	40568	867	29	17	4	0	1	0	0	1	1	0	0	0	0	0	0	46276	447	20	9	3	1	2	0	0	0
ES71i	G	32	0	1	1	38435	2184	76	61	20	6	12	0	0	0	0	0	0	0	0	0	0	40606	781	25	59	9	1	7	0	0	0	0	0	0	0	0	0	0	46298	385	13	59	0	2	2	0	0	0
	A	33	0	0	0	40419	210	98	56	2	0	7	0	1	0	0	0	1	0	0	0	0	41186	208	63	20	4	3	4	0	0	0	0	0	0	0	0	0	0	46542	141	56	13	5	2	0	0	0	0
ES70d	G	34	6	5	-1	70	227	202	81	67	2157	37944	45	1	0	0	0	0	0	0	0	0	45	158	204	68	51	847	40067	45	2	1	0	0	0	0	0	0	0	50	121	163	67	45	467	45800	45	0	1
ES69i	A	35	0	1	1	38257	2442	33	26	14	12	9	0	1	0	0	0	0	0	0	0	0	40434	1023	11	7	2	2	7	1	1	0	0	0	0	0	0	0	0	46197	537	4	8	3	2	7	1	0	0
ES68i	G	36	0	1	1	38291	2380	41	51	13	9	4	3	1	1	0	0	0	0	0	0	0	40437	998	27	17	3	5	1	0	0	0	0	0	0	0	0	0	0	46189	550	12	3	1	0	4	0	0	0
ES67d	G	37	1	0	-1	2419	38147	38	144	10	10	24	0	1	1	0	0	0	0	0	0	0	1114	40251	23	79	9	3	8	0	0	0	1	0	0	0	0	0	0	678	46013	14	46	6	2	0	0	0	0
ES66i	G	38	0	2	2	38233	62	2371	25	9	2	7	7	74	3	1	0	0	0	0	0	0	40360	56	993	10	9	0	5	1	50	3	0	0	1	0	0	0	0	46132	51	531	5	5	0	2	2	31	0
ES65i	G	39	0	2	2	38134	210	2386	29	4	28	1	2	0	0	0	0	0	0	0	0	0	40277	180	996	15	3	13	2	2	0	0	0	0	0	0	0	0	0	46072	134	535	8	1	9	0	0	0	0
ES64i	A	40	0	3	3	38160	102	136	2321	18	1	52	2	0	0	1	1	0	0	0	0	0	40379	86	48	946	5	3	21	0	0	0	0	0	0	0	0	0	0	46138	99	25	482	9	0	6	0	0	0
	C	41	0	0	0	40431	199	126	31	4	2	0	0	0	1	0	0	0	0	0	0	0	41196	142	125	18	5	2	0	0	0	0	0	0	0	0	0	0	0	46576	105	66	11	1	0	0	0	0	0
ES63d	G	42	1	0	-1	3223	37548	17	6	0	0	0	0	0	0	0	0	0	0	0	0	0	2855	38628	4	0	1	0	0	0	0	0	0	0	0	0	0	0	0	2181	44577	1	0	0	0	0	0	0	0
ES62i	G	43	0	4	4	37955	222	112	162	2310	27	2	4	0	0	0	0	0	0	0	0	0	40418	161	71	57	772	7	0	0	2	0	0	0	0	0	0	0	0	46234	107	43	28	345	2	0	0	0	0
ES61i	A	44	0	4	4	37976	184	133	198	2297	6	0	0	0	0	0	0	0	0	0	0	0	40067	294	191	158	768	8	0	1	0	0	0	0	1	0	0	0	0	45947	177	179	119	334	3	0	0	0	0
ES60i	G	45	0	3	3	37417	117	121	2920	192	26	1	0	0	0	0	0	0	0	0	0	0	38736	277	76	2296	91	10	2	0	0	0	0	0	0	0	0	0	0	44848	215	62	1589	38	6	1	0	0	0
ES59i	A	46	0	4	4	37355	18	81	923	2403	8	5	0	0	1	0	0	0	0	0	0	0	38736	39	43	1657	1006	5	0	1	1	0	0	0	0	0	0	0	0	44896	46	49	1242	521	5	0	0	0	0
ES58i	G	47	0	1	1	37325	2440	17	34	973	0	5	0	0	0	0	0	0	0	0	0	0	38784	1081	46	37	1538	1	1	0	0	0	0	0	0	0	0	0	0	44995	594	49	37	1084	0	0	0	0	0
ES57i	A	48	0	2	2	37321	191	2452	17	806	5	2	0	0	0	0	0	0	0	0	0	0	38929	320	1046	50	1137	1	2	0	2	1	0	0	0	0	0	0	0	45213	183	530	50	783	0	0	0	0	0
ES56i	A	49	0	2	2	37292	36	3439	19	6	0	2	0	0	0	0	0	0	0	0	0	0	39117	60	2297	14	0	0	0	0	0	0	0	0	0	0	0	0	0	45393	46	1312	3	5	0	0	0	0	0
ES55i	A	50	0	1	1	37283	3283	219	4	2	1	2	0	0	0	0	0	0	0	0	0	0	39198	2015	263	12	0	0	0	0	0	0	0	0	0	0	0	0	0	45417	1197	138	5	2	0	0	0	0	0
ES54i	G	51	0	1	1	37291	3316	129	8	49	1	0	0	0	0	0	0	0	0	0	0	0	38814	2560	92	2	18	0	2	0	0	0	0	0	0	0	0	0	0	44840	1858	48	1	12	0	0	0	0	0
	A	52	0	0	0	40491	33	202	6	0	62	0	0	0	0	0	0	0	0	0	0	0	41223	32	203	4	2	24	0	0	0	0	0	0	0	0	0	0	0	46623	14	106	0	2	14	0	0	0	0
	G	53	0	0	0	40685	35	72	1	1	0	0	0	0	0	0	0	0	0	0	0	0	41444	14	28	0	0	0	0	0	2	0	0	0	0	0	0	0	0	46733	5	20	1	0	0	0	0	0	0
ES53i	C	54	0	1	1	38673	2110	6	3	2	0	0	0	0	0	0	0	0	0	0	0	0	40623	853	4	6	2	0	0	0	0	0	0	0	0	0	0	0	0	46327	427	5	0	0	0	0	0	0	0
	C	55	0	0	0	40779	10	3	2	0	0	0	0	0	0	0	0	0	0	0	0	0	41461	11	15	1	0	0	0	0	0	0	0	0	0	0	0	0	0	46739	6	14	0	0	0	0	0	0	0
	G	56	0	0	0	39630	1164	0	0	0	0	0	0	0	0	0	0	0	0	0	0	0	40630	856	1	0	1	0	0	0	0	0	0	0	0	0	0	0	0	46197	561	0	1	0	0	0	0	0	0
ES52d	C	57	2	0	-2	3712	178	36900	1	2	0	0	0	0	0	1	0	0	0	0	0	0	3322	102	38062	1	0	0	1	0	0	0	0	0	0	0	0	0	0	2447	77	44234	0	0	1	0	0	0	0
	G	58	0	0	0	40769	23	2	0	0	0	0	0	0	0	0	0	0	0	0	0	0	41476	6	6	0	0	0	0	0	0	0	0	0	0	0	0	0	0	46756	2	1	0	0	0	0	0	0	0
	A	59	0	0	0	40630	96	32	27	5	2	2	0	0	0	0	0	0	0	0	0	0	41403	61	12	8	0	2	1	1	0	0	0	0	0	0	0	0	0	46712	34	9	3	0	0	0	1	0	0
ES51i	G	60	0	2	2	37040	286	3421	40	1	2	1	3	0	0	0	0	0	0	0	0	0	38150	391	2939	4	1	0	3	0	0	0	0	0	0	0	0	0	0	44296	280	2177	3	3	0	0	0	0	0
	C	61	0	0	0	40632	138	14	9	1	0	0	0	0	0	0	0	0	0	0	0	0	41394	78	8	5	1	0	2	0	0	0	0	0	0	0	0	0	0	46694	57	5	1	2	0	0	0	0	0
	C	62	0	0	0	40789	2	2	1	0	0	0	0	0	0	0	0	0	0	0	0	0	41486	2	0	0	0	0	0	0	0	0	0	0	0	0	0	0	0	46752	5	2	0	0	0	0	0	0	0
	C	63	0	0	0	40686	107	1	0	0	0	0	0	0	0	0	0	0	0	0	0	0	41421	66	0	0	0	0	0	1	0	0	0	0	0	0	0	0	0	46722	35	0	0	0	0	0	2	0	0
	A	64	0	0	0	40614	174	4	2	0	0	0	0	0	0	0	0	0	0	0	0	0	41386	101	1	0	0	0	0	0	0	0	0	0	0	0	0	0	0	46703	50	2	4	0	0	0	0	0	0
	G	65	0	0	0	40444	83	180	78	2	3	0	0	4	0	0	0	0	0	0	0	0	41073	74	279	53	3	2	0	0	4	0	0	0	0	0	0	0	0	46476	38	223	20	1	1	0	0	0	0
ES50i	C	66	0	2	2	37786	104	2872	12	3	15	0	1	1	0	0	0	0	0	0	0	0	39394	73	2019	2	0	0	0	0	0	0	0	0	0	0	0	0	0	45284	30	1442	0	2	1	0	0	0	0
	C	67	0	0	0	39839	933	19	3	0	0	0	0	0	0	0	0	0	0	0	0	0	40363	1119	4	2	0	0	0	0	0	0	0	0	0	0	0	0	0	45903	848	6	2	0	0	0	0	0	0
	G	68	0	0	0	39855	864	35	40	0	0	0	0	0	0	0	0	0	0	0	0	0	40339	1117	8	24	0	0	0	0	0	0	0	0	0	0	0	0	0	45893	842	8	15	1	0	0	0	0	0
	G	69	0	0	0	38566	341	1760	51	15	56	1	3	1	0	0	0	0	0	0	0	0	38593	221	2615	37	7	13	0	1	1	0	0	0	0	0	0	0	0	44567	132	2024	24	2	10	0	0	0	0
ES49i	A	70	0	1	1	36190	4286	261	37	9	5	1	3	2	0	0	0	0	0	0	0	0	37922	3482	64	8	6	6	0	0	0	0	0	0	0	0	0	0	0	44195	2516	29	6	9	2	2	0	0	0
	A	71	0	0	0	38652	195	181	151	1544	55	11	1	4	0	0	0	0	0	0	0	0	38525	105	136	109	2595	17	1	0	0	0	0	0	0	0	0	0	0	44515	71	90	76	1997	10	0	0	0	0
	C	72	0	0	0	40474	294	18	6	1	0	0	0	0	1	0	0	0	0	0	0	0	41263	206	18	1	0	0	0	0	0	0	0	0	0	0	0	0	0	46643	106	9	1	0	0	0	0	0	0
	C	73	0	0	0	40662	112	14	5	1	0	0	0	0	0	0	0	0	0	0	0	0	41447	39	1	1	0	0	0	0	0	0	0	0	0	0	0	0	0	46732	26	1	0	0	0	0	0	0	0
	G	74	0	0	0	40664	42	81	5	2	0	0	0	0	0	0	0	0	0	0	0	0	41281	47	156	2	2	0	0	0	0	0	0	0	0	0	0	0	0	46653	20	86	0	0	0	0	0	0	0
	A	75	0	0	0	40065	250	136	80	25	231	6	0	1	0	0	0	0	0	0	0	0	41023	144	58	19	17	224	3	0	0	0	0	0	0	0	0	0	0	46478	98	31	18	13	118	2	0	0	1
	C	76	0	0	0	40170	317	90	170	39	6	0	2	0	0	0	0	0	0	0	0	0	41285	126	35	35	6	0	0	0	0	1	0	0	0	0	0	0	0	46628	79	24	23	5	0	0	0	0	0
	G	77	0	0	0	40701	80	3	10	0	0	0	0	0	0	0	0	0	0	0	0	0	41463	20	2	2	1	0	0	0	0	0	0	0	0	0	0	0	0	46749	10	0	0	0	0	0	0	0	0
ES48i	G	78	0	1	1	36126	4141	203	279	21	15	2	5	1	1	0	0	0	0	0	0	0	37924	3347	65	142	3	3	0	3	0	0	0	1	0	0	0	0	0	44294	2360	41	64	0	0	0	0	0	0
ES47i	A	79	0	1	1	35754	3770	673	499	31	41	8	8	0	0	1	2	5	2	0	0	0	37442	3236	568	232	1	6	0	2	0	0	0	0	0	0	1	0	0	44091	2284	269	104	2	8	0	1	0	0
ES46i	G	80	0	2	2	35393	1720	3479	121	9	15	6	35	1	14	1	0	0	0	0	0	0	34937	3514	2996	17	4	9	1	2	3	4	1	0	0	0	0	0	0	41850	2711	2186	4	3	2	0	2	0	1
ES45i	A	81	0	1	1	36352	4135	169	77	27	22	3	1	7	0	0	1	0	0	0	0	0	38008	3400	48	25	3	2	0	0	2	0	0	0	0	0	0	0	0	44337	2382	31	6	2	1	0	0	0	0
ES44i	G	82	0	1	1	31699	8138	485	269	21	39	136	4	0	1	1	0	1	0	0	0	0	31263	9973	154	40	7	7	42	2	0	0	0	0	0	0	0	0	0	38723	7828	118	47	4	5	34	0	0	0
	C	83	0	0	0	39796	654	151	183	8	2	0	0	0	0	0	0	0	0	0	0	0	41211	206	46	22	2	0	1	0	0	0	0	0	0	0	0	0	0	46531	177	23	23	5	0	0	0	0	0
ES43d	C	84	2	0	-2	10295	703	29759	30	5	0	2	0	0	0	0	0	0	0	0	0	0	11642	343	29498	4	1	0	0	0	0	0	0	0	0	0	0	0	0	10359	351	36042	6	1	0	0	0	0	0
ES42d	G	85	4	0	-4	11701	446	126	145	28355	18	1	2	0	0	0	0	0	0	0	0	0	13763	135	95	145	27336	12	0	2	0	0	0	0	0	0	0	0	0	13461	120	63	165	32933	15	0	0	2	0
ES41i	A	86	0	1	1	31835	7492	1238	89	121	13	5	0	1	0	0	0	0	0	0	0	0	32033	9065	291	48	41	7	3	0	0	0	0	0	0	0	0	0	0	39448	7028	205	42	25	9	2	0	0	0
ES40i	A	87	0	4	4	31214	836	1205	523	6957	48	9	2	0	0	0	0	0	0	0	0	0	30824	384	505	1130	8615	24	4	2	0	0	0	0	0	0	0	0	0	38342	217	347	1186	6659	8	0	0	0	0
ES39i	A	88	1	3	2	2453	29962	489	7565	258	46	14	1	3	1	0	1	0	1	0	0	0	3710	27741	271	9637	108	10	7	2	1	0	0	0	0	1	0	0	0	5583	33169	222	7716	55	6	6	0	1	0
ES38i	A	89	0	1	1	29036	8579	1730	1106	163	88	26	64	2	0	0	0	0	0	0	0	0	29887	10112	1014	357	53	34	9	19	3	0	0	0	0	0	0	0	0	37688	8053	676	263	36	21	4	16	2	0
ES37i	A	90	0	1	1	30046	8175	1302	384	256	226	111	86	204	3	0	1	0	0	0	0	0	29977	10181	675	160	58	90	51	29	260	6	0	1	0	0	0	0	0	37699	8092	504	93	54	51	50	23	189	4
	A	91	0	0	0	36149	1123	2232	722	239	73	242	7	5	1	0	0	1	0	0	0	0	39060	566	1225	246	104	43	232	3	7	2	0	0	0	0	0	0	0	45058	400	871	172	80	21	150	4	3	0
ES36i	G	92	0	4	4	28948	2849	679	1557	6554	114	61	8	4	9	8	1	1	0	0	1	0	30195	1012	715	668	8831	24	15	9	7	2	9	0	1	0	0	0	0	37749	715	623	480	7153	13	9	3	8	1
ES35i	G	93	0	3	3	30798	2050	698	6688	436	107	7	5	3	1	0	0	0	0	1	0	0	31202	756	584	8673	166	99	6	2	0	0	0	0	0	0	0	0	0	38658	609	460	6869	99	55	6	1	2	0
	G	94	0	0	0	36877	2549	365	475	384	76	32	32	4	0	0	0	0	0	0	0	0	38748	2018	166	388	109	20	15	22	2	0	0	0	0	0	0	0	0	44895	1377	116	240	106	9	1	12	1	0
	A	95	0	0	0	36172	2110	1488	335	130	80	43	63	27	314	29	3	0	0	0	0	0	38660	1198	806	151	58	43	71	153	51	269	25	3	0	0	0	0	0	44712	949	596	97	47	38	30	79	22	164
ES34i	G	96	0	1	1	30983	7555	1347	740	68	43	26	11	6	12	0	1	2	0	0	0	0	29369	10352	1540	150	23	27	14	4	2	7	0	0	0	0	0	0	0	36318	9034	1235	107	11	41	5	1	5	2
ES33i	G	97	0	2	2	25903	1242	10000	2369	775	155	211	128	7	2	1	0	1	0	0	0	0	23873	1939	14314	753	392	56	69	88	3	1	0	0	0	0	0	0	0	30078	1874	13881	496	303	32	47	45	2	1
	C	98	0	0	0	34428	4300	276	1700	63	12	6	8	1	0	0	0	0	0	0	0	0	35714	4462	204	1072	25	3	3	5	0	0	0	0	0	0	0	0	0	40763	4572	195	1181	30	7	2	9	0	0
	G	99	0	0	0	36208	1586	66	2908	18	5	3	0	0	0	0	0	0	0	0	0	0	38056	1102	41	2277	6	5	1	0	0	0	0	0	0	0	0	0	0	42888	1161	50	2655	3	2	0	0	0	0
ES32i	G	100	0	2	2	24723	5870	9258	222	413	38	29	13	202	23	1	2	0	0	0	0	0	22305	4844	12325	152	1368	48	25	17	374	26	1	2	1	0	0	0	0	27971	5230	11681	120	1199	51	21	18	438	26
ES31i	G	101	0	8	8	24521	5238	1575	126	439	84	196	189	8222	195	8	0	1	0	0	0	0	22202	3980	2664	186	795	164	184	263	10821	219	9	1	0	0	0	0	0	27958	4503	2495	186	672	163	191	308	10059	210
ES30i	G	102	0	2	2	24869	321	14120	602	826	47	5	4	0	0	0	0	0	0	0	0	0	22402	537	15682	541	2189	107	19	6	3	2	0	0	0	0	0	0	0	28635	867	14782	451	1910	86	14	6	6	0
ES29i	A	103	0	4	4	28754	1374	514	621	9434	34	57	2	3	0	1	0	0	0	0	0	0	25545	2792	709	539	11836	16	49	2	0	0	0	0	0	0	0	0	0	32418	2537	1007	566	10186	12	27	5	1	0
ES28i	G	104	0	2	2	25497	5085	9618	501	26	17	7	40	3	0	0	0	0	0	0	0	0	25579	3563	12055	246	6	13	1	22	2	0	1	0	0	0	0	0	0	32784	3645	10133	149	14	13	6	13	0	0
	G	105	0	0	0	34443	1337	343	4516	52	82	4	16	0	0	1	0	0	0	0	0	0	37586	714	377	2770	16	21	0	4	0	0	0	0	0	0	0	0	0	43091	587	357	2697	9	18	0	0	0	0
ES27i	A	106	0	3	3	27894	898	657	10843	50	440	4	3	3	0	2	0	0	0	0	0	0	25815	448	787	14224	31	178	3	0	2	0	0	0	0	0	0	0	0	33841	453	865	11492	20	86	1	0	1	0
	G	107	0	0	0	33089	5258	2011	206	90	73	3	11	10	38	5	0	0	0	0	0	0	36083	3041	2229	69	25	22	4	1	0	14	0	0	0	0	0	0	0	39806	3228	3596	62	24	22	8	1	1	11
ES26i	A	108	0	2	2	25867	2853	11793	159	80	11	11	18	2	0	0	0	0	0	0	0	0	21026	3204	17117	99	29	1	1	9	2	0	0	0	0	0	0	0	0	25000	5286	16375	68	13	6	1	10	0	0
ES25i	G	109	0	1	1	20972	17152	1935	551	103	25	7	8	41	0	0	0	0	0	0	0	0	18841	20400	1942	231	45	9	4	10	5	0	1	0	0	0	0	0	0	22874	20454	3282	110	23	6	3	1	6	0
ES24d	C	110	3	1	-2	3231	18074	362	19075	33	17	1	0	0	1	0	0	0	0	0	0	0	3815	20982	176	16505	6	3	0	0	0	1	0	0	0	0	0	0	0	5173	21031	139	20411	5	0	0	0	0	0
	A	111	0	0	0	40511	168	88	27	0	0	0	0	0	0	0	0	0	0	0	0	0	41303	98	73	13	0	1	0	0	0	0	0	0	0	0	0	0	0	46612	79	61	6	1	0	0	0	0	0
ES23i	A	112	0	2	2	21572	2502	16307	192	128	63	13	17	0	0	0	0	0	0	0	0	0	20671	1992	18667	69	57	23	7	1	1	0	0	0	0	0	0	0	0	26923	2383	17328	50	34	25	13	3	0	0
Es22i	A	113	0	3	3	20484	2100	730	16749	520	162	31	13	2	1	0	0	2	0	0	0	0	18357	1901	623	20280	222	87	12	2	2	0	0	1	1	0	0	0	0	22522	2603	785	20613	164	65	6	1	0	0
Es21i	A	114	0	2	2	18884	1369	18283	1425	203	133	267	26	182	5	2	9	5	1	0	0	0	17301	844	21432	1644	66	51	90	8	40	2	2	4	4	0	0	0	0	21488	736	21742	2639	54	43	32	4	18	2
ES20i	A	115	0	1	1	18663	17956	2110	967	651	222	87	101	19	2	0	4	10	2	0	0	0	18916	19510	1949	538	378	87	64	26	14	0	1	1	2	1	1	0	0	23325	19476	2800	644	365	75	51	10	10	0
	G	116	0	0	0	34076	2763	1830	607	542	351	78	236	205	27	5	22	44	7	1	0	0	36731	2453	891	363	493	152	49	167	124	12	4	14	31	4	0	0	0	41344	3280	980	287	397	117	76	125	120	5
	A	117	0	0	0	35750	2340	619	797	402	230	218	63	38	42	26	73	166	28	2	0	0	38205	1562	481	426	215	146	104	34	22	26	21	63	152	28	3	0	0	43585	1788	493	302	145	88	65	36	19	16
ES19d	G	118	3	0	-3	19620	3046	683	16574	147	362	303	15	12	6	1	10	11	4	0	0	0	23645	1828	442	15052	77	189	207	11	4	10	0	6	16	1	0	0	0	25637	1769	504	18515	58	106	133	7	4	2
	G	119	0	0	0	35106	2935	787	1238	412	273	12	10	19	2	0	0	0	0	0	0	0	38322	1637	571	670	163	105	9	7	2	2	0	0	0	0	0	0	0	44020	1391	601	457	180	86	9	13	1	1
	G	120	0	0	0	35648	2104	990	1437	144	435	8	25	1	2	0	0	0	0	0	0	0	37982	2065	414	692	77	229	5	23	1	0	0	0	0	0	0	0	0	43059	2507	386	566	70	129	11	24	0	7
	G	121	1	1	0	2150	33529	2713	774	408	1104	83	26	3	4	0	0	0	0	0	0	0	1738	36327	2143	494	233	487	33	30	2	1	0	0	0	0	0	0	0	2412	40809	2314	602	170	401	34	15	2	0
	G	122	0	0	0	34586	3961	1243	530	116	306	22	25	3	2	0	0	0	0	0	0	0	36611	2991	1410	196	50	159	28	40	2	1	0	0	0	0	0	0	0	41343	3278	1748	170	46	121	22	30	0	1
ES18i	G	123	0	1	1	17582	21755	434	442	63	80	121	309	5	3	0	0	0	0	0	0	0	15165	25313	355	415	27	53	50	106	2	2	0	0	0	0	0	0	0	18396	27161	520	448	28	59	28	111	3	3
	G	124	0	0	0	34362	5236	188	181	405	41	22	347	7	4	1	0	0	0	0	0	0	37126	3428	99	113	263	21	17	417	3	0	0	1	0	0	0	0	0	42197	3600	99	127	245	33	35	418	5	0
ES17i	G	125	0	4	4	16758	587	5211	454	17355	221	203	3	2	0	0	0	0	0	0	0	0	14407	425	3477	1098	21942	70	62	4	2	0	0	0	1	0	0	0	0	16838	545	3608	1815	23765	93	85	6	1	3
ES16i	G	126	0	2	2	15206	1078	24461	31	4	4	3	7	0	0	0	0	0	0	0	0	0	13389	882	27190	17	5	0	1	3	0	1	0	0	0	0	0	0	0	15718	1082	29921	28	6	2	0	2	0	0
	A	127	0	0	0	32933	3160	2467	1863	18	337	12	4	0	0	0	0	0	0	0	0	0	35717	1950	1687	1675	15	429	10	5	0	0	0	0	0	0	0	0	0	40616	1919	1792	1980	14	433	4	1	0	0
ES15i	A	128	0	3	3	14573	5037	228	20892	17	22	24	1	0	0	0	0	0	0	0	0	0	12972	3560	175	24752	6	15	7	0	0	0	0	0	1	0	0	0	0	15458	3604	180	27469	14	21	10	3	0	0
	C	129	0	0	0	36829	3277	296	363	21	2	3	1	0	0	2	0	0	0	0	0	0	37719	2927	375	453	11	1	0	1	0	1	0	0	0	0	0	0	0	42636	3197	364	550	10	0	0	0	1	0
	C	130	0	0	0	39768	702	186	14	119	3	0	2	0	0	0	0	0	0	0	0	0	40525	542	193	8	219	1	0	0	0	0	0	0	0	0	0	0	0	45698	522	314	3	219	1	0	2	0	0
	C	131	0	0	0	40525	140	124	3	1	1	0	0	0	0	0	0	0	0	0	0	0	41299	115	69	4	1	0	0	0	0	0	0	0	0	0	0	0	0	46542	129	81	4	3	0	0	0	0	0
ES14d	G	132	3	0	-3	27548	3581	217	9419	10	10	2	2	2	3	0	0	0	0	0	0	0	32855	2490	135	5995	6	4	0	1	2	0	0	0	0	0	0	0	0	37523	2465	143	6610	7	7	3	0	1	0
ES13d	G	133	4	0	-4	25558	1728	2091	635	10752	19	5	0	3	2	1	0	0	0	0	0	0	29638	3166	1229	538	6910	4	1	0	0	1	1	0	0	0	0	0	0	32810	4820	1129	583	7407	4	5	0	1	0
ES12i	G	134	0	1	1	13646	19427	357	7334	17	9	3	0	1	0	0	0	0	0	0	0	0	13874	21229	198	6167	7	11	0	1	1	0	0	0	0	0	0	0	0	16456	22772	220	7300	6	3	2	0	0	0
ES11d	A	135	2	1	-1	865	25402	6365	296	7819	12	31	4	0	0	0	0	0	0	0	0	0	1580	29369	3976	171	6374	6	9	2	1	0	0	0	0	0	0	0	0	3024	31814	4187	307	7408	2	12	5	0	0
	A	136	0	0	0	25770	14758	70	119	24	11	9	2	2	3	24	2	0	0	0	0	0	26342	15051	26	47	10	3	0	1	0	0	7	1	0	0	0	0	0	29610	17071	22	43	5	0	2	0	0	1
	A	137	0	0	0	32197	448	8070	53	15	1	5	5	0	0	0	0	0	0	0	0	0	34866	369	6216	17	13	2	1	4	0	0	0	0	0	0	0	0	0	39229	364	7118	18	17	2	5	6	0	0
	G	138	0	0	0	32289	282	8136	13	67	6	0	0	1	0	0	0	0	0	0	0	0	35272	301	5885	10	18	2	0	0	0	0	0	0	0	0	0	0	0	39643	331	6763	6	16	0	0	0	0	0
ES10i	A	139	0	1	1	13025	27675	54	30	8	2	0	0	0	0	0	0	0	0	0	0	0	14732	26707	26	21	1	0	1	0	0	0	0	0	0	0	0	0	0	17848	28869	21	18	2	1	0	0	0	0
ES9i	A	140	0	2	2	6120	7427	27206	16	5	10	1	1	1	0	1	2	3	1	0	0	0	5921	9280	26262	17	7	1	0	0	0	0	0	0	0	0	0	0	0	7801	10537	28404	13	3	0	0	0	0	0
ES8i	A	141	0	1	1	12960	19053	6731	1854	190	6	0	0	0	0	0	0	0	0	0	0	0	11724	20429	8746	505	84	0	0	0	0	0	0	0	0	0	0	0	0	14573	21741	9918	434	92	1	0	0	0	0
	C	142	0	0	0	24200	980	15504	24	75	2	9	0	0	0	0	0	0	0	0	0	0	23062	663	17713	27	22	0	1	0	0	0	0	0	0	0	0	0	0	24369	857	21488	27	16	1	1	0	0	0
	A	143	0	0	0	40747	33	11	2	1	0	0	0	0	0	0	0	0	0	0	0	0	41469	18	1	0	0	0	0	0	0	0	0	0	0	0	0	0	0	46723	33	1	0	2	0	0	0	0	0
ES7d	C	144	1	0	-1	37640	3102	27	3	21	0	1	0	0	0	0	0	0	0	0	0	0	39459	2017	9	2	1	0	0	0	0	0	0	0	0	0	0	0	0	44682	2056	19	0	1	1	0	0	0	0
	G	145	0	0	0	40655	126	13	0	0	0	0	0	0	0	0	0	0	0	0	0	0	41414	64	7	2	1	0	0	0	0	0	0	0	0	0	0	0	0	46704	47	7	1	0	0	0	0	0	0
ES6d	A	146	3	1	-2	8151	27242	2936	2342	123	0	0	0	0	0	0	0	0	0	0	0	0	5801	33188	795	1692	11	1	0	0	0	0	0	0	0	0	0	0	0	6772	37583	705	1678	21	0	0	0	0	0
ES5i	G	147	0	2	2	4939	152	35683	6	7	3	0	0	4	0	0	0	0	0	0	0	0	2446	167	38854	10	3	0	0	0	8	0	0	0	0	0	0	0	0	2358	275	44099	14	0	0	0	0	13	0
ES4i	A	148	0	1	1	4755	36000	27	8	0	3	0	1	0	0	0	0	0	0	0	0	0	2292	39170	19	3	4	0	0	0	0	0	0	0	0	0	0	0	0	2187	44551	15	2	3	1	0	0	0	0
	A	149	0	0	0	40764	9	15	2	0	1	1	2	0	0	0	0	0	0	0	0	0	41456	22	7	2	1	0	0	0	0	0	0	0	0	0	0	0	0	46745	8	3	1	0	0	1	1	0	0
	G	150	0	0	0	40769	3	12	7	3	0	0	0	0	0	0	0	0	0	0	0	0	41463	1	11	6	7	0	0	0	0	0	0	0	0	0	0	0	0	46738	2	13	5	1	0	0	0	0	0
ES3i	A	151	0	2	2	1569	19	39203	3	0	0	0	0	0	0	0	0	0	0	0	0	0	1385	22	40079	1	0	0	1	0	0	0	0	0	0	0	0	0	0	1401	17	45338	3	0	0	0	0	0	0
	G	152	0	0	0
	A	153	0	0	0
ES2d	A	154	4	3	-1
	G	155	0	0	0
	A	156	0	0	0
ES1i	A	157	0	1	1
	A	158	1	1	0
	A	159	0	0	0
	G	160	0	0	0
	A	161	0	0	0
	A	162	1	1	0
3' end	G	163	1	1	0
Total
[truncated: 7 more columns]

[truncated: 8 more sheets: RPS12_H2-RNAi mtRNA 0-4 Day R1, RPS12_H2-RNAi mtRNA 0-4 Day R2, A6_F1-RNAi Ext vs IPs R1, A6_F1-RNAi Ext vs IPs R2, A6_F1-RNAi RESC6-IP 0-4 Day R1, A6_F1-RNAi RESC6-IP 0-4 Day R2, A6_F1-RNAi mtRNA 0-4 Day R1, A6_F1-RNAi mtRNA 0-4 Day R2]
