# Supplementary material
Source: HighWire-hosted journal article supplement (doi:10.1101/rna.076513.120)
Supplement: Supplemental_Table_S3.xlsx [file Supplemental_Table_S3.xlsx]

## Sheet: RPS12_CorInc ratio_mtRNA vs IPs
Supplementary Table S3. RPS12 Cor, Inc, and Ratio values: mtRNA vs IPs
Notes: See the suplementary table legend for additional details.
						Ext vs IPs (KH2F1-RNAi samples at day 0)																			Ext vs IPs (KREH2-RNAi samples at day 0)
F1=	KH2F1
H2=	KREH2
						J01 - 0 Day mtRNA			J04 - 0 Day H2-IP			J07 - 0 Day RESC6-IP			J10 - 0 Day mtRNA - Bio Rep			J13 - 0 Day H2-IP - Bio Rep			J16 - 0 Day RESC6-IP - Bio Rep				J19 - 0 Day mtRNA			J22 - 0 Day F1-IP			J25 - 0 Day RESC6-IP			J28 - 0 Day mtRNA - Bio Rep			J31 - 0 Day F1-IP - Bio Rep			J34 - 0 Day RESC6-IP - Bio Rep
			Ts present before each T-stripped position			37560 Reads			24023 Reads			28777 Reads			44940 Reads			32064 Reads			24612 Reads				44178 Reads			44644 Reads			40477 Reads			32620 Reads			38504 Reads			38909 Reads
Canonical Editing Site (ES)	Sequence	T-stripped Position	pre-edited	edited	editing events: Ins (+), Del (-)	Correct %	Incorrect %	Ratio	Correct %	Incorrect %	Ratio	Correct %	Incorrect %	Ratio	Correct %	Incorrect %	Ratio	Correct %	Incorrect %	Ratio	Correct %	Incorrect %	Ratio		Correct %	Incorrect %	Ratio	Correct %	Incorrect %	Ratio	Correct %	Incorrect %	Ratio	Correct %	Incorrect %	Ratio	Correct %	Incorrect %	Ratio	Correct %	Incorrect %	Ratio
	C	1
	A	2
	A	3
	A	4
	C	5
	A	6
	C	7
	G	8
	A	9
	A	10
	A	11
	C	12
	A	13
	A	14
	A	15
	C	16	0	0	0
	A	17	1	1	0	5' UTR "Form B"
	A	18	0	0	0
	A	19	0	0	0
	G	20	0	0	0
	A	21	1	1	0
	A	22	0	0	0
ES76i	A	23	0	1	1
	A	24	0	0	0
	A	25	0	0	0
ES75i	G	26	0	4	4
ES74i	G	27	0	8	8
	C	28	0	0	0
	G	29	0	0	0
ES73i	A	30	0	1	1
ES72i	G	31	0	1	1	7.71299	0.43131	0.0559199	12.3299	0.649378	0.0526671	27.8903	0.792299	0.0284077	5.6186	0.431687	0.0768317	13.7101	0.70484	0.0514104	20.5388	0.609459	0.0296736		11.0326	1.30382	0.118178	9.45928	0.972135	0.102771	22.4844	1.4255	0.0633996	9.97854	1.27529	0.127803	12.6766	1.14014	0.0899406	23.19	1.50094	0.0647235
ES71i	G	32	0	1	1	7.5426	0.460596	0.061066	12.0676	0.715981	0.0593308	27.3587	0.809674	0.0295948	5.48064	0.427236	0.0779537	13.5604	0.689247	0.050828	20.0918	0.666342	0.0331648		10.641	1.29703	0.121889	9.27784	0.943016	0.101642	21.9829	1.44774	0.0658575	9.71183	1.25077	0.128788	12.4429	1.03366	0.0830724	22.6529	1.54977	0.0684139
	A	33	0	0	0	98.951	1.04899	0.0106011	98.5847	1.41531	0.0143563	97.8594	2.1406	0.0218742	99.0832	0.916778	0.00925261	98.5997	1.40032	0.0142021	98.3748	1.62522	0.0165207		97.8134	2.18661	0.0223549	98.4141	1.58588	0.0161143	97.1243	2.87571	0.0296085	97.897	2.103	0.0214818	98.2755	1.7245	0.0175476	96.9853	3.01473	0.0310844
ES70d	G	34	6	5	-1	7.34558	1.97817	0.2693	11.6264	2.57253	0.221267	26.2571	3.614	0.137639	5.41389	1.69559	0.313194	13.0739	2.48565	0.190124	19.1695	3.11637	0.162569		10.4464	3.51306	0.336295	9.01801	2.70361	0.299801	20.8069	4.74343	0.227974	9.44819	3.49172	0.369565	12.0715	3.17889	0.263339	21.3935	4.85749	0.227054
ES69i	A	35	0	1	1	8.25346	0.290202	0.0351613	12.8169	0.42043	0.0328029	28.4776	0.503875	0.0176937	6.11704	0.23587	0.0385595	14.234	0.50524	0.0354952	20.9898	0.426621	0.0203252		11.7638	0.826203	0.0702328	10.1066	0.595825	0.0589539	23.2502	0.8721	0.0375093	10.6898	0.8645	0.0808718	13.3856	0.773946	0.0578192	24.087	0.791591	0.0328638
ES68i	G	36	0	1	1	8.17359	0.399361	0.0488599	12.7295	0.432918	0.0340092	28.3768	0.54905	0.0193485	5.94571	0.311526	0.0523952	14.128	0.533308	0.0377483	20.9694	0.499756	0.0238326		11.6529	0.952963	0.0817793	9.94535	0.79742	0.0801802	23.0551	1.02527	0.0444706	10.5702	0.953403	0.0901972	13.2402	0.945356	0.0714005	23.8865	0.914955	0.0383043
ES67d	G	37	1	0	-1	8.30138	0.615016	0.074086	12.8086	0.641052	0.0500487	28.4602	0.729749	0.025641	6.05696	0.571874	0.0944159	14.1405	0.789047	0.0558006	21.0507	0.633837	0.03011		11.8113	1.25175	0.105979	10.0058	1.07517	0.107455	23.2848	1.36374	0.0585676	10.7572	1.34273	0.124822	13.1882	1.25701	0.0953131	23.9996	1.42127	0.0592204
ES66i	G	38	0	2	2	8.1656	0.479233	0.0586893	12.6504	0.536985	0.0424482	28.2865	0.5699	0.0201474	5.94793	0.465065	0.0781893	14.0095	0.636228	0.0454141	20.8882	0.548513	0.0262595		11.4944	1.06388	0.0925561	9.82663	0.846698	0.0861637	23.0501	1.09445	0.0474812	10.3955	1.168	0.112356	13.1311	1.00249	0.0763449	23.7246	1.1951	0.0503737
ES65i	G	39	0	2	2	8.13898	0.846645	0.104024	12.5588	0.924114	0.073583	28.1649	1.0425	0.0370142	5.98353	0.678683	0.113425	13.9908	0.976173	0.0697726	20.7988	0.812612	0.0390701		11.4061	1.84481	0.161738	9.76167	1.35741	0.139055	22.771	1.96655	0.0863622	10.2728	1.86695	0.181737	13.0116	1.48037	0.113772	23.501	2.03552	0.0866142
ES64i	A	40	0	3	3	7.9606	0.881257	0.110702	12.3423	1.04899	0.0849916	27.8764	1.17802	0.0422588	5.81219	0.772141	0.132848	13.76	1.14147	0.0829556	20.5713	0.971071	0.0472052		11.1662	1.94667	0.174336	9.5332	1.66652	0.174812	22.4152	2.18643	0.0975422	10.0092	2.06009	0.205819	12.6325	1.88552	0.14926	23.1283	2.05865	0.0890099
	C	41	0	0	0	98.7327	1.26731	0.0128357	98.9302	1.06981	0.0108138	99.0757	0.924349	0.00932973	99.1077	0.892301	0.00900335	98.9396	1.06038	0.0107174	99.0614	0.938567	0.00947459		97.6889	2.31111	0.0236578	98.058	1.94203	0.0198049	98.0285	1.97149	0.0201114	97.6426	2.35745	0.0241437	97.7587	2.24133	0.0229271	98.1033	1.89673	0.019334
ES63d	G	42	1	0	-1	11.1262	0.0878594	0.00789663	14.7026	0.0582775	0.00396376	29.8051	0.066025	0.00221523	8.03961	0.0600801	0.00747301	16.0367	0.0873253	0.00544535	22.2737	0.0365675	0.00164174		15.8337	0.0814885	0.00514653	13.6972	0.0806379	0.00588716	26.3952	0.148232	0.00561587	14.9724	0.0980993	0.00655201	17.2761	0.12726	0.00736621	26.855	0.123365	0.00459374
ES62i	G	43	0	4	4	7.86475	1.8344	0.233243	12.3007	1.46526	0.11912	27.8174	1.36915	0.0492192	5.79217	1.31286	0.226662	13.7101	1.48141	0.108053	20.4575	1.30424	0.0637537		10.8697	2.77061	0.254894	9.29576	2.16378	0.232771	22.2941	2.51254	0.112699	9.86511	2.77437	0.281231	12.3753	2.56597	0.207345	23.0461	2.37477	0.103044
ES61i	A	44	0	4	4	7.80618	2.03408	0.260573	12.2216	1.59014	0.130109	27.7027	1.36915	0.049423	5.76101	1.28393	0.222866	13.6259	1.62176	0.11902	20.4534	1.19454	0.0584029		10.7429	3.37951	0.314581	9.20616	2.84249	0.308759	22.1681	2.95723	0.1334	9.66278	3.52851	0.365165	12.2663	3.10098	0.252805	22.9073	2.62407	0.114552
ES60i	G	45	0	3	3	10.2423	1.44569	0.141149	13.9991	0.969904	0.0692834	29.044	1.10505	0.0380474	7.31197	1.10147	0.150639	15.31	1.08845	0.0710939	21.5667	0.975134	0.0452148		13.4207	3.33198	0.248271	11.6634	2.70809	0.232187	24.1372	3.0437	0.1261	12.3391	3.40282	0.275776	15.214	2.98411	0.196142	24.6832	2.98389	0.120887
ES59i	A	46	0	4	4	8.33333	3.6475	0.4377	12.538	2.57253	0.205179	28.0398	2.13712	0.0762176	6.01691	2.55674	0.424926	13.9752	2.55115	0.182549	20.685	1.89339	0.0915341		11.2183	5.72457	0.510291	9.48616	5.06003	0.533412	22.4943	4.7879	0.21285	10.1196	5.83078	0.576189	12.4558	5.90328	0.473937	23.1874	4.54394	0.195965
ES58i	G	47	0	1	1	8.52503	3.57029	0.418801	12.5546	2.60584	0.20756	28.0849	2.18925	0.077951	6.11037	2.53004	0.414057	14.0407	2.61352	0.186139	20.7622	1.94621	0.0937378		11.293	5.797	0.513329	9.60487	5.04659	0.52542	22.5733	4.89414	0.216811	10.2299	5.90435	0.577165	12.5493	5.90328	0.470406	23.2491	4.63646	0.199425
ES57i	A	48	0	2	2	8.54366	3.6049	0.421938	12.5921	2.61416	0.207603	28.1127	2.1267	0.0756489	6.13262	2.51669	0.410377	14.0407	2.56362	0.182586	20.7907	1.89745	0.0912644		11.3405	5.79021	0.510579	9.58919	5.05331	0.52698	22.6351	4.81261	0.212617	10.2606	5.92275	0.577233	12.5571	5.87212	0.467632	23.2388	4.60819	0.198297
ES56i	A	49	0	2	2	12.0634	0.22098	0.0183183	15.1105	0.245598	0.0162534	30.1282	0.211975	0.00703576	8.57365	0.149088	0.017389	16.5388	0.215195	0.0130115	22.6272	0.134081	0.00592566		17.0198	0.208248	0.0122357	14.5663	0.194875	0.0133784	27.3439	0.219878	0.0080412	16.0178	0.22992	0.0143541	18.3487	0.215562	0.0117481	27.7879	0.154206	0.00554939
ES55i	A	50	0	1	1	11.5096	0.756124	0.0656951	14.7567	0.561961	0.0380818	29.8641	0.434375	0.014545	8.19315	0.542946	0.0662683	16.1334	0.564496	0.0349894	22.3468	0.329108	0.0147273		14.4099	2.84757	0.197612	12.2973	2.48186	0.201821	25.37	2.16172	0.0852079	13.1852	3.11465	0.236224	15.9983	2.59454	0.162175	25.7447	2.15888	0.0838574
ES54i	G	51	0	1	1	11.6427	0.625666	0.0537389	14.6235	0.674354	0.0461144	29.1483	0.948674	0.0325465	8.26435	0.456164	0.0551966	15.9244	0.757859	0.0475911	21.8227	0.788233	0.0361199		16.4471	0.660962	0.0401872	14.0198	0.741421	0.0528838	26.3137	0.948687	0.036053	15.5365	0.68363	0.0440016	17.6969	0.758363	0.0428529	26.6648	1.03318	0.038747
	A	52	0	0	0	98.9457	1.05431	0.0106555	99.1425	0.857512	0.00864928	99.2286	0.771449	0.00777447	99.2679	0.732087	0.00737486	99.0956	0.904441	0.00912696	99.3987	0.601333	0.00604971		96.8695	3.13052	0.0323169	97.1665	2.83353	0.0291616	97.3145	2.68548	0.0275958	96.5757	3.42428	0.0354569	97.0549	2.94515	0.0303452	97.3168	2.68318	0.0275716
	G	53	0	0	0	99.5607	0.439297	0.00441235	99.6753	0.324689	0.00325747	99.8193	0.1807	0.00181027	99.733	0.267023	0.00267738	99.6413	0.358658	0.00359949	99.7847	0.215342	0.00215807		99.6356	0.364435	0.00365768	99.5655	0.434549	0.00436445	99.6541	0.345875	0.00347076	99.5371	0.462906	0.00465059	99.6156	0.384376	0.00385859	99.6916	0.308412	0.00309366
ES53i	C	54	0	1	1	7.42013	0.0319489	0.00430571	10.6689	0.0374641	0.00351151	23.3798	0.031275	0.00133769	5.28037	0.0267023	0.00505689	11.4989	0.0311876	0.00271223	17.3533	0.0325045	0.0018731		12.1237	0.0497985	0.00410754	9.89159	0.0291193	0.00294384	21.1824	0.0296465	0.00139958	11.4071	0.0398529	0.00349368	12.4455	0.038957	0.00313022	21.4141	0.0385515	0.00180029
	C	55	0	0	0	99.9228	0.0772098	0.000772695	99.9126	0.0874162	0.000874927	99.9757	0.024325	0.000243309	99.9644	0.035603	0.000356157	99.9407	0.0592565	0.000592916	99.9634	0.0365675	0.000365809		99.9525	0.047535	0.000475576	99.9485	0.0515187	0.000515452	99.9284	0.0716456	0.00071697	99.9295	0.0705089	0.000705586	99.9091	0.0908996	0.000909823	99.9589	0.0411216	0.000411385
	G	56	0	0	0	95.9079	4.09212	0.0426672	96.0788	3.92124	0.0408128	94.0404	5.95962	0.063373	97.1228	2.87717	0.029624	95.5433	4.45671	0.046646	95.425	4.575	0.0479435		95.8033	4.19666	0.0438049	95.9681	4.0319	0.0420129	94.676	5.32401	0.056234	96.1067	3.89332	0.0405104	94.959	5.04103	0.0530865	94.6439	5.35609	0.056592
ES52d	C	57	2	0	-2	13.1523	0.559105	0.0425101	15.8765	0.520335	0.032774	30.6669	0.260625	0.00849858	9.23899	0.447263	0.0484104	17.2748	0.499002	0.0288861	23.0335	0.268162	0.0116423		18.0067	0.414233	0.0230044	15.6326	0.459188	0.0293738	28.048	0.380463	0.0135647	17.0325	0.524218	0.0307775	19.2733	0.532412	0.0276243	28.4793	0.377805	0.013266
	G	58	0	0	0	99.9068	0.0931842	0.000932712	99.8959	0.104067	0.00104175	99.9375	0.06255	0.000625891	99.9399	0.0600801	0.000601162	99.9064	0.0935629	0.000936505	99.9269	0.0731351	0.000731886		99.8732	0.12676	0.00126921	99.823	0.176955	0.00177269	99.8493	0.150703	0.0015093	99.8529	0.147149	0.00147366	99.8468	0.153231	0.00153466	99.8869	0.113084	0.00113212
	A	59	0	0	0	99.3983	0.601704	0.00605346	99.4589	0.541148	0.00544092	99.6734	0.32665	0.0032772	99.5928	0.40721	0.00408875	99.5384	0.461577	0.00463717	99.7115	0.288477	0.00289312		99.4681	0.531939	0.00534784	99.3975	0.602545	0.00606197	99.5133	0.486696	0.00489076	99.3807	0.619252	0.00623111	99.3819	0.618118	0.00621962	99.5605	0.439487	0.00441427
ES51i	G	60	0	2	2	12.0101	1.30458	0.108623	14.8608	1.13225	0.0761905	29.4854	1.17802	0.0399529	8.50467	0.834446	0.0981162	16.1365	1.23503	0.0765365	22.1559	0.98326	0.0443792		16.8885	1.26307	0.0747889	14.2371	1.44924	0.101794	26.8004	1.34397	0.0501475	15.8921	1.30595	0.0821759	17.8293	1.60503	0.0900218	27.1325	1.51636	0.0558871
	C	61	0	0	0	99.4249	0.57508	0.00578406	99.5629	0.437081	0.00439	99.7012	0.29885	0.00299746	99.5906	0.409435	0.00411118	99.5228	0.477171	0.00479458	99.7562	0.243784	0.00244379		99.5065	0.493458	0.00495905	99.5386	0.461428	0.00463567	99.6022	0.397757	0.00399345	99.4237	0.576334	0.00579674	99.5195	0.48047	0.00482789	99.6222	0.377805	0.00379237
	C	62	0	0	0	99.9681	0.0319489	0.000319591	99.9833	0.0166507	0.000166535	99.9896	0.010425	0.000104261	99.9889	0.0111259	0.000111272	99.9657	0.0343064	0.000343182	99.9959	0.00406306	4.06322e-05		99.9728	0.0271628	0.000271702	99.9754	0.0246394	0.000246454	99.9876	0.0123527	0.000123542	99.9816	0.0183936	0.00018397	99.9662	0.0337627	0.000337741	99.9743	0.025701	0.000257076
	C	63	0	0	0	99.6672	0.332801	0.00333912	99.6337	0.366316	0.00367662	99.7811	0.218925	0.00219405	99.7308	0.269248	0.00269975	99.7006	0.299401	0.003003	99.8253	0.174712	0.00175017		99.7555	0.244466	0.00245065	99.6797	0.320312	0.00321341	99.7332	0.266818	0.00267532	99.6505	0.349479	0.00350704	99.7325	0.267505	0.00268222	99.7019	0.298132	0.00299023
	A	64	0	0	0	99.4116	0.588392	0.00591874	99.3964	0.603588	0.00607254	99.5795	0.420475	0.0042225	99.5572	0.442813	0.00444782	99.3669	0.633109	0.00637143	99.6262	0.373801	0.00375204		99.4703	0.529675	0.00532496	99.3325	0.667503	0.00671988	99.5059	0.494108	0.00496561	99.4145	0.58553	0.00588979	99.3118	0.68824	0.0069301	99.4166	0.583413	0.00586836
	G	65	0	0	0	98.3706	1.62939	0.0165638	98.6888	1.31124	0.0132867	99.1869	0.813149	0.00819816	99.1144	0.885625	0.00893539	98.5903	1.40968	0.0142984	99.1549	0.845116	0.00852319		98.6962	1.30382	0.0132104	98.6224	1.37756	0.0139681	98.8858	1.11421	0.0112677	98.737	1.26303	0.0127919	98.6599	1.34012	0.0135832	98.9591	1.04089	0.0105184
ES50i	C	66	0	2	2	10.1251	0.57508	0.0567973	12.2674	0.416268	0.0339328	24.7142	0.364875	0.0147638	7.12283	0.329328	0.0462356	13.367	0.414795	0.0310313	18.5235	0.329108	0.0177671		14.1292	0.597583	0.0422941	11.5648	0.577905	0.0499709	22.6548	0.518813	0.0229008	13.4304	0.619252	0.0461082	14.2505	0.649283	0.0455622	22.9767	0.503739	0.0219239
	C	67	0	0	0	96.64	3.35996	0.0347678	96.2827	3.71727	0.0386079	94.2593	5.7407	0.0609032	97.6012	2.39875	0.0245771	96.0267	3.9733	0.0413771	95.5794	4.42061	0.0462506		95.9482	4.05179	0.0422289	95.9838	4.01622	0.0418427	94.7649	5.23507	0.0552427	96.1925	3.80748	0.0395819	94.9823	5.01766	0.0528273	94.5128	5.48716	0.0580573
	G	68	0	0	0	96.8397	3.16028	0.0326341	96.4617	3.53828	0.0366806	94.3566	5.6434	0.0598092	97.6547	2.34535	0.0240168	96.2762	3.7238	0.0386783	95.7663	4.23371	0.0442087		95.989	4.01105	0.0417865	96.0756	3.92438	0.0408468	94.8218	5.17825	0.0546104	96.1649	3.83507	0.0398801	95.0706	4.92936	0.0518494	94.5565	5.44347	0.0575684
	G	69	0	0	0	91.5202	8.47977	0.0926545	92.9484	7.05158	0.0758655	95.8787	4.12135	0.042985	94.506	5.49399	0.0581338	92.9329	7.06712	0.0760454	95.4372	4.56281	0.0478096		92.3921	7.60786	0.0823431	91.3426	8.65738	0.0947792	94.2189	5.78106	0.0613577	92.851	7.14899	0.0769942	90.6218	9.37825	0.103488	94.3715	5.62852	0.0596421
ES49i	A	70	0	1	1	15.3168	1.3099	0.0855206	17.2876	1.02818	0.0594751	31.2993	0.747124	0.0238703	10.652	0.796618	0.0747859	18.5598	1.1134	0.0599899	23.8989	0.877621	0.0367222		19.9285	0.950699	0.0477056	17.382	1.09981	0.0632732	29.3673	0.983274	0.033482	19.1937	0.977928	0.0509503	21.1225	1.11157	0.0526251	29.8543	0.837852	0.0280647
	A	71	0	0	0	91.7891	8.21086	0.0894535	93.2898	6.71024	0.071929	96.2818	3.71825	0.0386184	94.6996	5.3004	0.0559707	93.3976	6.60242	0.0706916	95.7785	4.22152	0.0440758		92.7022	7.29775	0.0787225	91.8533	8.14667	0.0886922	94.5747	5.4253	0.0573653	93.2158	6.78418	0.0727793	91.3282	8.67183	0.0949524	94.8264	5.17361	0.0545588
	C	72	0	0	0	98.6555	1.34452	0.0136284	98.9219	1.07813	0.0108988	98.9714	1.0286	0.0103929	99.2034	0.796618	0.00803015	98.8461	1.15394	0.0116741	99.0655	0.934503	0.00943319		98.746	1.25402	0.0126994	98.7076	1.29245	0.0130937	98.6041	1.39585	0.0141561	98.7247	1.27529	0.0129176	98.6469	1.35311	0.0137167	98.8178	1.18225	0.0119639
	C	73	0	0	0	99.4835	0.516507	0.00519189	99.5255	0.474545	0.00476808	99.5795	0.420475	0.0042225	99.6751	0.324878	0.00325937	99.4573	0.542665	0.00545626	99.5571	0.442873	0.00444843		99.5518	0.448187	0.00450205	99.4535	0.546546	0.0054955	99.4812	0.518813	0.00521519	99.5861	0.413857	0.00415576	99.3975	0.602535	0.00606187	99.5836	0.416356	0.00418097
	G	74	0	0	0	99.5341	0.465921	0.00468102	99.6004	0.399617	0.0040122	99.5517	0.448275	0.00450293	99.6862	0.313752	0.00314739	99.554	0.445983	0.00447981	99.6099	0.390054	0.00391581		99.4318	0.568156	0.00571403	99.5587	0.441269	0.00443225	99.4491	0.55093	0.00553982	99.4543	0.545677	0.00548671	99.4832	0.516829	0.00519514	99.4834	0.51659	0.00519273
	A	75	0	0	0	97.0607	2.9393	0.0302831	97.519	2.48096	0.0254407	98.1513	1.8487	0.0188352	98.2109	1.78905	0.0182164	97.4364	2.56362	0.0263107	98.0497	1.95027	0.0198906		97.1819	2.81814	0.0289987	97.1396	2.86041	0.0294464	97.4257	2.5743	0.0264232	97.3544	2.64562	0.0271751	97.0185	2.98151	0.0307313	97.6227	2.37734	0.0243524
	C	76	0	0	0	97.4654	2.53461	0.0260052	98.0893	1.91067	0.0194789	98.5926	1.40737	0.0142746	98.4646	1.53538	0.0155932	98.1974	1.80264	0.0183574	98.452	1.54803	0.0157237		97.8021	2.19793	0.0224732	97.7511	2.2489	0.0230064	97.9124	2.08761	0.0213212	97.9001	2.09994	0.0214498	97.7327	2.2673	0.023199	98.0313	1.9687	0.0200823
	G	77	0	0	0	99.5927	0.407348	0.00409014	99.7502	0.249761	0.00250386	99.7741	0.225875	0.00226386	99.773	0.226969	0.00227486	99.7255	0.274451	0.00275206	99.7725	0.227531	0.0022805		99.6695	0.330481	0.00331577	99.6573	0.342711	0.0034389	99.7554	0.244583	0.00245183	99.7026	0.297364	0.0029825	99.6624	0.337627	0.00338771	99.6864	0.313552	0.00314538
ES48i	G	78	0	1	1	14.7897	2.03674	0.137714	17.0836	1.75665	0.102827	31.2785	1.24752	0.0398845	10.2581	1.31509	0.1282	18.2604	1.8619	0.101964	23.8055	1.11328	0.0467657		19.3037	1.73616	0.089939	16.9474	1.75835	0.103754	28.8337	1.5095	0.052352	18.1668	1.67075	0.0919676	20.5537	2.0803	0.101213	29.258	1.41355	0.0483134
ES47i	A	79	0	1	1	13.2801	4.96539	0.373897	15.993	3.94206	0.246486	30.3819	2.59582	0.0854398	9.36137	3.14642	0.336106	17.069	3.65831	0.214325	22.8466	2.79945	0.122532		18.2625	4.13781	0.226574	15.861	4.10581	0.258862	27.9196	3.78734	0.135652	17.2869	4.08952	0.236567	19.2837	4.36838	0.226532	28.2942	3.6187	0.127895
ES46i	G	80	0	2	2	12.1965	7.2311	0.592884	14.9024	6.27315	0.42095	29.5583	3.80512	0.128733	8.63596	4.83756	0.560165	15.9993	6.10342	0.381481	21.9568	3.88428	0.176906		17.0153	6.17728	0.363044	14.479	7.32909	0.506188	26.8375	5.31413	0.198012	16.0944	6.06376	0.376762	17.8916	7.92125	0.442735	27.315	5.0631	0.185359
ES45i	A	81	0	1	1	14.5714	1.39244	0.09556	16.7465	1.22799	0.0733284	30.8927	1.01122	0.0327334	10.2781	0.747664	0.072743	17.9204	1.12587	0.0628263	23.2366	0.971071	0.0417905		19.1543	1.0254	0.0535334	16.5039	1.09981	0.0666395	28.6558	1.08951	0.0380205	18.0625	1.0607	0.0587237	20.0057	1.09339	0.054654	28.9984	1.09743	0.0378445
ES44i	G	82	0	1	1	29.566	3.80192	0.128591	29.401	3.14698	0.107037	37.8983	2.66532	0.0703283	20.1802	2.34312	0.11611	29.937	3.24663	0.108449	31.2937	2.48253	0.07933		31.862	2.84757	0.089372	32.2821	3.06648	0.0949903	38.7529	2.98194	0.0769476	30.7174	2.82649	0.092016	36.7702	3.24901	0.0883599	38.9036	2.94533	0.0757085
	C	83	0	0	0	96.262	3.73802	0.0388317	96.8239	3.17612	0.0328031	97.8803	2.11975	0.0216565	97.5323	2.46773	0.0253017	97.2025	2.79753	0.0287804	97.5906	2.40939	0.0246888		97.3086	2.69138	0.0276582	96.7879	3.21208	0.0331868	97.1836	2.81641	0.0289803	97.29	2.70999	0.0278548	97.0678	2.93216	0.0302074	97.489	2.51099	0.0257566
ES43d	C	84	2	0	-2	37.09	2.72364	0.0734334	36.6399	2.20206	0.0601	43.0761	1.63672	0.0379961	25.4339	1.85358	0.0728784	37.3129	1.80576	0.0483952	36.7666	1.62116	0.0440933		37.779	1.82217	0.0482325	39.862	2.22874	0.0559114	44.8008	2.01843	0.0450535	36.5941	2.09074	0.0571333	44.1746	2.19717	0.0497384	44.9973	1.90701	0.0423806
ES42d	G	85	4	0	-4	41.4723	2.68104	0.0646466	40.6985	1.92732	0.047356	45.7449	1.5568	0.0340322	28.9341	1.8202	0.0629086	40.8433	1.86502	0.0456628	39.7977	1.76743	0.0444104		40.9593	1.86971	0.045648	44.3733	1.91067	0.0430591	48.0841	2.09502	0.0435699	39.9326	1.95586	0.048979	48.93	1.95564	0.0399682	48.1534	1.91472	0.039763
ES41i	A	86	0	1	1	27.1725	5.3967	0.198609	26.7286	5.86105	0.21928	35.8307	3.74952	0.104646	18.5158	3.65376	0.197332	27.6603	5.52957	0.19991	28.9859	3.87209	0.133586		29.6233	3.6285	0.122488	29.6344	5.11155	0.172487	36.1835	3.71322	0.102622	28.504	3.6634	0.128522	33.7783	4.76314	0.141012	36.5006	3.6701	0.100549
ES40i	A	87	0	4	4	25.5378	9.28914	0.363741	25.538	8.87067	0.347351	34.6561	6.33492	0.182794	17.1985	6.4664	0.375987	26.0697	8.82922	0.338677	27.5435	6.35056	0.230565		28.0773	7.27285	0.259029	27.9634	9.19496	0.328821	34.5085	7.18927	0.208333	27.1245	7.15819	0.263901	32.4512	9.02504	0.278111	34.8685	7.17315	0.20572
ES39i	A	88	1	3	2	27.4175	11.2859	0.411633	27.3488	10.7938	0.394673	36.0322	7.43649	0.206384	18.6894	8.14197	0.435647	27.8849	10.4822	0.375909	29.1606	8.25207	0.282987		29.5735	8.42727	0.28496	30.0376	10.81	0.359881	35.8945	9.15829	0.255145	28.5622	8.59289	0.300848	34.438	10.6197	0.308371	36.1819	9.11357	0.251882
ES38i	A	89	0	1	1	30.852	11.4297	0.370469	29.8963	10.5108	0.351573	38.152	7.30097	0.191365	21.1949	7.9061	0.373018	30.2988	10.3106	0.340299	31.5578	7.93922	0.251577		32.2468	9.03391	0.280149	32.9316	11.4259	0.34696	39.0913	9.0817	0.23232	31.2876	8.96076	0.2864	37.8818	11.1261	0.293706	39.2608	8.99535	0.229118
ES37i	A	90	0	1	1	29.5927	9.13738	0.308772	29.2719	8.48354	0.289818	37.3249	5.9353	0.159017	20.2381	6.32176	0.312369	29.7842	8.48303	0.284817	30.5461	6.09052	0.199388		31.235	6.89936	0.220886	32.1387	8.39531	0.261221	37.9648	6.7841	0.178695	30.0981	6.76579	0.224791	36.5339	8.6095	0.235658	38.2893	6.72081	0.175527
	A	91	0	0	0	83.967	16.033	0.190944	86.3547	13.6453	0.158014	89.2345	10.7655	0.120643	88.4579	11.5421	0.130481	86.8544	13.1456	0.151352	88.3878	11.6122	0.131378		86.6449	13.3551	0.154136	84.4391	15.5609	0.184285	86.1007	13.8993	0.16143	86.6033	13.3967	0.15469	84.09	15.91	0.189203	86.4916	13.5084	0.156182
ES36i	G	92	0	4	4	23.8072	18.099	0.760233	24.5556	16.1554	0.657908	33.36	11.954	0.358333	16.1727	13.0797	0.808751	24.9439	15.4815	0.620655	26.1986	13.2456	0.505583		26.3095	14.3624	0.5459	26.9398	17.3708	0.644799	32.8285	14.7788	0.450181	25.1042	14.4482	0.575528	31.2747	17.5436	0.560953	33.0438	14.8243	0.448627
ES35i	G	93	0	3	3	24.2545	11.8717	0.489462	25.1134	11.1601	0.444389	33.8082	7.82917	0.231576	16.5176	8.16199	0.49414	25.3399	10.9936	0.433846	26.8162	8.38615	0.312727		26.8143	8.51102	0.317407	27.5222	11.2692	0.409457	33.3498	8.3183	0.249426	25.699	8.50092	0.330789	31.9032	10.656	0.334012	33.7891	8.42736	0.249411
	G	94	0	0	0	86.1688	13.8312	0.160513	88.1114	11.8886	0.134927	90.8642	9.13577	0.100543	90.2982	9.70182	0.107442	87.762	12.238	0.139446	90.6184	9.3816	0.103529		89.4835	10.5165	0.117525	87.3824	12.6176	0.144395	89.7547	10.2453	0.114148	89.9663	10.0337	0.111528	87.1572	12.8428	0.147352	89.8455	10.1545	0.113021
	A	95	0	0	0	83.8818	16.1182	0.192154	85.4639	14.5361	0.170084	89.5403	10.4597	0.116816	88.6493	11.3507	0.12804	85.1516	14.8484	0.174376	88.7209	11.2791	0.12713		88.1932	11.8068	0.133874	85.0618	14.9382	0.175616	88.5219	11.4781	0.129664	88.5561	11.4439	0.129228	85.3288	14.6712	0.171937	88.4628	11.5372	0.130418
ES34i	G	96	0	1	1	27.6757	8.05911	0.291198	27.4945	6.7144	0.244209	36.0322	5.24725	0.145626	18.676	5.60525	0.300131	27.573	6.87063	0.24918	28.9005	5.58671	0.193308		29.3427	6.36063	0.216771	30.125	7.50381	0.249089	36.0254	6.37646	0.176999	28.3017	6.05763	0.214038	34.3445	7.97839	0.232305	36.4826	5.98576	0.164072
ES33i	G	97	0	2	2	33.8951	17.4255	0.514099	35.4077	13.8367	0.390783	40.0389	11.4883	0.286929	24.7508	12.0694	0.487638	35.6007	13.7537	0.386334	35.0561	12.2664	0.349907		33.4216	13.724	0.410633	39.1139	14.5663	0.372409	40.8998	13.8844	0.339474	32.0907	13.8044	0.430168	43.328	15.7906	0.364443	41.2964	13.9916	0.33881
	C	98	0	0	0	79.6778	20.3222	0.255054	80.2689	19.7311	0.245812	86.6525	13.3475	0.154034	84.2434	15.7566	0.187036	80.3113	19.6887	0.245156	83.9347	16.0653	0.191403		86.3575	13.6425	0.157978	79.7106	20.2894	0.254538	85.7944	14.2056	0.165577	86.683	13.317	0.153629	79.8203	20.1797	0.252814	85.1834	14.8166	0.173938
	G	99	0	0	0	85.8706	14.1294	0.164543	84.315	15.685	0.186028	90.5828	9.41724	0.103963	88.6538	11.3462	0.127984	84.6214	15.3786	0.181734	88.5381	11.4619	0.129457		89.9701	10.0299	0.11148	82.8913	17.1087	0.206399	89.8362	10.1638	0.113137	90.2023	9.79767	0.108619	83.5446	16.4554	0.196966	89.2107	10.7893	0.120941
ES32i	G	100	0	2	2	33.0857	21.8051	0.659049	31.3824	20.855	0.664544	38.7879	15.4186	0.397509	22.9484	16.8046	0.73228	31.275	20.8365	0.666235	32.2851	17.979	0.556884		34.447	15.3153	0.444605	35.1604	21.5751	0.61362	40.8528	16.7478	0.409954	33.4733	14.9264	0.44592	40.588	21.6757	0.534041	40.7849	17.1631	0.42082
ES31i	G	101	0	8	8	29.566	25.9318	0.877082	28.9847	23.8397	0.82249	35.4623	19.109	0.538854	20.3694	19.8865	0.976295	29.0232	23.6371	0.814421	28.7461	21.9446	0.763392		31.8394	18.19	0.571307	33.178	24.1399	0.727586	37.4385	20.4857	0.547182	30.6499	18.2036	0.593919	38.3597	24.317	0.63392	37.2407	20.9463	0.562457
ES30i	G	102	0	2	2	47.6651	6.46699	0.135676	47.8333	3.98368	0.0832826	48.5805	5.2542	0.108155	34.9399	4.46818	0.127882	47.5705	4.05127	0.0851636	44.1573	5.68422	0.128727		45.0088	4.44792	0.0988232	53.0015	3.48983	0.065844	51.3773	5.96141	0.116032	43.6082	4.54936	0.104323	58.0927	3.82817	0.0658977	51.8389	5.85469	0.11294
ES29i	A	103	0	4	4	34.3823	8.29073	0.241134	32.5355	5.16588	0.158777	39.3474	7.46082	0.189614	23.3378	6.48643	0.277937	32.6566	5.06487	0.155095	32.476	8.43897	0.259852		35.4566	5.22432	0.147344	36.1392	4.17749	0.115594	41.7793	7.48326	0.179114	34.393	5.33415	0.155094	42.193	4.19956	0.0995322	41.5971	7.37876	0.177386
ES28i	G	104	0	2	2	34.5181	17.476	0.506286	32.5813	18.2742	0.560879	40.1015	11.3841	0.283882	23.7984	13.9942	0.588032	32.5692	18.2822	0.561333	33.3536	14.0338	0.420758		35.323	12.9386	0.366293	36.0183	20.1012	0.558085	41.8089	13.6423	0.326301	34.2367	12.7315	0.371866	41.7593	19.8135	0.47447	41.944	13.9428	0.332414
	G	105	0	0	0	81.065	18.935	0.233579	80.5561	19.4439	0.24137	87.3892	12.6108	0.144306	84.3547	15.6453	0.18547	80.461	19.539	0.242839	84.4629	15.5371	0.183952		86.0881	13.9119	0.161601	78.7676	21.2324	0.269558	85.4041	14.5959	0.170905	86.309	13.691	0.158628	79.0074	20.9926	0.265705	84.9084	15.0916	0.17774
ES27i	A	106	0	3	3	38.0458	6.59478	0.173338	34.4295	4.47488	0.129972	44.056	5.21945	0.118473	26.8046	5.11348	0.190769	34.4998	4.71245	0.136594	38.1724	6.16772	0.161575		37.5662	4.90742	0.130634	37.2458	4.43061	0.118956	45.6605	6.37893	0.139703	36.5788	4.94175	0.135099	42.8631	4.91378	0.114639	45.5576	6.51777	0.143067
	G	107	0	0	0	78.6182	21.3818	0.27197	77.6131	22.3869	0.288442	85.7873	14.2127	0.165674	80.988	19.012	0.234751	77.7383	22.2617	0.286368	82.4963	17.5037	0.212175		84.078	15.922	0.189371	76.0461	23.9539	0.314993	83.8081	16.1919	0.193202	84.2244	15.7756	0.187304	76.7323	23.2677	0.303232	83.4563	16.5437	0.198232
ES26i	A	108	0	2	2	40.4925	7.02077	0.173384	36.4068	6.68526	0.183627	46.704	5.8519	0.125298	29.1455	7.79261	0.267369	36.3118	6.45272	0.177703	41.2847	7.31757	0.177246		39.3431	5.50274	0.139865	38.8115	6.68175	0.172159	47.8617	6.11952	0.127858	38.2649	5.61312	0.146691	44.5045	6.26688	0.140815	47.8553	6.11684	0.12782
ES25i	G	109	0	1	1	55.5165	7.00479	0.126175	53.3114	5.99426	0.112439	56.3749	5.09087	0.0903039	42.3899	6.60214	0.155748	52.888	6.01609	0.113752	53.2504	6.05802	0.113765		50.5885	5.14509	0.101705	57.459	5.96945	0.103891	58.4702	6.45552	0.110407	49.0895	5.61619	0.114407	62.4247	5.83576	0.0934848	58.66	6.52805	0.111286
ES24d	C	110	3	1	-2	58.3839	10.0506	0.172146	55.3511	7.54277	0.136271	58.651	7.47472	0.127444	44.6173	9.05429	0.202933	55.2364	7.34157	0.132912	55.9849	9.07687	0.162131		53.0807	7.66218	0.14435	59.569	8.53866	0.143341	61.6498	9.27687	0.150477	51.6186	7.94605	0.153938	65.1153	7.96021	0.122248	61.9188	9.45283	0.152665
	A	111	0	0	0	98.9963	1.00373	0.010139	99.2632	0.736794	0.00742263	99.2876	0.712374	0.00717486	99.2857	0.714286	0.00719424	99.4106	0.589446	0.00592941	99.1874	0.812612	0.00819269		99.2734	0.726606	0.00731924	99.2922	0.707822	0.00712868	99.1378	0.862218	0.00869717	99.3194	0.680564	0.00685227	99.2364	0.763557	0.00769432	99.0259	0.974068	0.00983649
ES23i	A	112	0	2	2	54.803	8.24281	0.150408	51.7296	5.99009	0.115796	54.9779	6.95694	0.126541	40.3182	7.15843	0.177548	51.5095	6.15956	0.119581	51.8121	7.83764	0.15127		49.7872	6.27914	0.12612	56.3099	6.33232	0.112455	57.991	7.45362	0.128531	48.7922	5.91968	0.121324	61.578	6.25649	0.101603	58.8064	7.73857	0.131594
Es22i	A	113	0	3	3	52.886	10.5485	0.199456	52.0002	7.45536	0.143372	53.991	7.91257	0.146553	41.3462	8.77392	0.212206	51.55	7.77196	0.150765	51.028	9.20283	0.180349		47.7704	8.58119	0.179634	55.3221	8.83881	0.15977	55.1647	10.3738	0.188051	46.5849	8.52544	0.183009	59.8431	9.34189	0.156106	55.6632	10.6582	0.191477
Es21i	A	114	0	2	2	57.5399	10.804	0.187766	55.3803	7.66349	0.138379	57.4521	8.58324	0.149398	45.1936	8.91633	0.197292	55.3081	7.75636	0.140239	55.2088	9.7229	0.176111		51.374	9.40513	0.183072	59.0225	9.43016	0.159772	59.498	11.0063	0.184985	50.2575	9.27652	0.18458	63.6272	9.62757	0.151312	59.9373	11.0232	0.183911
ES20i	A	115	0	1	1	56.2993	13.3014	0.236262	54.6435	8.93727	0.163556	56.8093	10.279	0.18094	44.328	10.2359	0.230912	54.0357	9.35629	0.17315	54.8107	11.1653	0.203706		50.9281	10.6592	0.209298	58.234	10.9399	0.187861	58.7964	12.6813	0.215681	49.6475	10.7235	0.215993	62.9052	10.9911	0.174724	59.6546	12.8376	0.2152
	G	116	0	0	0	80.4526	19.5474	0.242968	86.0509	13.9491	0.162103	84.4911	15.5089	0.183557	83.4513	16.5487	0.198304	85.9687	14.0313	0.163214	82.1144	17.8856	0.217813		84.1211	15.8789	0.188763	83.9755	16.0245	0.190824	81.1671	18.8329	0.232027	84.298	15.702	0.186268	83.7809	16.2191	0.193589	80.5495	19.4505	0.241473
	A	117	0	0	0	83.5224	16.4776	0.197284	89.1729	10.8271	0.121417	87.3128	12.6872	0.145308	87.5745	12.4255	0.141884	88.9876	11.0124	0.123751	85.3364	14.6636	0.171833		87.0343	12.9657	0.148973	87.2413	12.7587	0.146246	83.8995	16.1005	0.191902	87.1766	12.8234	0.147097	87.2507	12.7493	0.146123	83.4357	16.5643	0.198528
ES19d	G	118	3	0	-3	59.2146	13.4425	0.227013	57.4449	9.23282	0.160725	59.829	10.8246	0.180926	48.4468	11.2617	0.232455	57.0203	9.96133	0.174698	58.3374	12.693	0.217579		53.2052	10.6139	0.199489	60.745	10.8055	0.177883	61.6424	13.4867	0.218789	52.1827	10.9258	0.209376	65.3932	11.1443	0.17042	62.3249	14.0045	0.224701
	G	119	0	0	0	81.7386	18.2614	0.223413	87.9865	12.0135	0.136538	85.6239	14.3761	0.167898	86.0214	13.9786	0.162502	87.2349	12.7651	0.14633	83.0327	16.9673	0.204345		85.6286	14.3714	0.167834	85.9354	14.0646	0.163665	81.9379	18.0621	0.220437	85.5395	14.4605	0.16905	85.4846	14.5154	0.169801	81.1021	18.8979	0.233014
	G	120	0	0	0	82.4681	17.5319	0.212591	88.0989	11.9011	0.135088	86.0444	13.9556	0.162191	87.3387	12.6613	0.144968	87.8555	12.1445	0.138232	84.0484	15.9516	0.18979		86.2601	13.7399	0.159284	86.2781	13.7219	0.159043	82.3702	17.6298	0.214031	85.9013	14.0987	0.164127	86.0742	13.9258	0.161789	81.9913	18.0087	0.219641
	G	121	1	1	0	79.0761	20.9239	0.264604	85.031	14.969	0.176042	82.2636	17.7364	0.215604	82.1273	17.8727	0.217622	84.4623	15.5377	0.18396	78.9452	21.0548	0.266701		83.5484	16.4516	0.196911	83.626	16.374	0.1958	78.7608	21.2392	0.269668	83.1453	16.8547	0.202714	83.4485	16.5515	0.198344	77.7378	22.2622	0.286376
	G	122	0	0	0	79.7977	20.2023	0.25317	86.2757	13.7243	0.159076	83.247	16.753	0.201244	84.7441	15.2559	0.180023	85.6007	14.3993	0.168215	81.119	18.881	0.232757		84.2478	15.7522	0.186974	84.121	15.879	0.188763	80.2085	19.7915	0.24675	83.97	16.03	0.190902	84.4172	15.5828	0.184593	79.4546	20.5454	0.25858
ES18i	G	123	0	1	1	67.9899	4.0229	0.059169	61.8033	2.94718	0.0476864	66.2995	3.60357	0.054353	53.607	3.62483	0.0676186	61.9573	3.00961	0.0485755	64.8952	4.29872	0.0662409		59.9325	3.70094	0.0617517	67.2319	3.59287	0.0534399	69.684	4.59767	0.0659789	58.6082	3.55917	0.0607281	71.8549	3.72948	0.051903	70.485	5.06567	0.0718687
	G	124	0	0	0	81.6001	18.3999	0.225489	86.5046	13.4954	0.156008	84.0463	15.9537	0.189821	84.2012	15.7988	0.187632	86.056	13.944	0.162034	81.574	18.426	0.22588		85.1283	14.8717	0.174697	85.6464	14.3536	0.167591	81.2659	18.7341	0.230528	84.8743	15.1257	0.178213	85.5599	14.4401	0.168771	80.7577	19.2423	0.238273
ES17i	G	125	0	4	4	52.6038	16.8983	0.321237	51.9169	14.0407	0.270446	54.3281	14.8556	0.273442	42.8616	16.3485	0.381425	51.3504	14.942	0.290981	51.3367	18.1578	0.3537		48.8094	13.2192	0.270834	55.7925	13.695	0.245463	55.7724	16.2636	0.291606	47.3973	13.7983	0.29112	60.5392	13.8609	0.228958	56.2029	17.307	0.307939
ES16i	G	126	0	2	2	74.4595	2.28967	0.0307505	67.0649	2.31861	0.0345727	72.2313	2.7105	0.0375253	60.2581	2.71028	0.0449778	66.9255	2.60729	0.038958	72.2534	3.157	0.0436934		64.6295	2.28394	0.035339	71.6647	2.30042	0.0320998	75.8406	2.4903	0.032836	63.6757	2.27161	0.0356747	76.6959	2.00758	0.0261759	77.1595	2.72431	0.0353074
	A	127	0	0	0	77.5905	22.4095	0.288817	84.1777	15.8223	0.187964	80.9744	19.0256	0.234958	80.7766	19.2234	0.237982	83.009	16.991	0.204689	77.6816	22.3184	0.287306		81.7964	18.2036	0.222548	82.4568	17.5432	0.212757	77.5107	22.4893	0.290145	81.7106	18.2894	0.223831	82.1863	17.8137	0.216748	76.4707	23.5293	0.30769
ES15i	A	128	0	3	3	65.394	12.7982	0.195709	60.2464	10.569	0.17543	64.8817	11.6065	0.178887	51.5354	12.9973	0.252202	59.3064	11.686	0.197045	62.9043	14.237	0.226327		57.8976	10.3264	0.178356	64.8419	10.2164	0.157558	67.1517	12.8962	0.192046	56.7811	10.748	0.189288	69.159	10.5651	0.152766	67.7478	13.7603	0.203111
	C	129	0	0	0	93.2801	6.71991	0.0720402	92.503	7.49698	0.0810458	93.3176	6.68242	0.0716094	90.287	9.71295	0.107579	92.9235	7.07647	0.0761537	93.3813	6.61872	0.0708785		91.6565	8.34352	0.0910303	94.0978	5.90225	0.0627247	94.2733	5.72671	0.0607458	91.4991	8.50092	0.0929072	94.8083	5.19167	0.0547596	94.6542	5.34581	0.0564772
	C	130	0	0	0	97.492	2.50799	0.0257251	98.2891	1.71086	0.0174064	98.1027	1.89735	0.0193404	97.4989	2.50111	0.0256527	98.0851	1.91492	0.0195231	97.4606	2.53941	0.0260558		97.7138	2.28621	0.023397	97.7869	2.21306	0.0226315	97.2577	2.7423	0.0281962	97.756	2.24402	0.0229553	97.5821	2.41793	0.0247784	96.9133	3.08669	0.03185
	C	131	0	0	0	99.1747	0.825346	0.00832215	99.3839	0.616076	0.00619895	99.093	0.906974	0.00915276	99.3502	0.649755	0.00654005	99.448	0.552021	0.00555085	98.9842	1.01576	0.0102619		99.004	0.995971	0.0100599	99.0861	0.913897	0.00922326	98.7054	1.29456	0.0131154	98.9454	1.05457	0.0106581	98.9534	1.04664	0.0105772	98.661	1.33902	0.0135719
ES14d	G	132	3	0	-3	73.5676	7.90735	0.107484	72.0185	8.10057	0.112479	75.4248	6.49477	0.0861092	67.7704	9.33467	0.13774	71.6099	8.63585	0.120596	74.6546	7.56948	0.101393		69.0593	8.76681	0.126946	72.8273	7.22829	0.0992526	74.887	7.23374	0.0965954	68.5408	8.98835	0.131139	76.4804	6.68762	0.0874423	75.6329	7.07034	0.0934824
ES13d	G	133	4	0	-4	68.1763	8.55964	0.125552	69.1088	8.47937	0.122696	70.0733	8.69444	0.124076	62.9105	10.9657	0.174307	68.0358	9.06312	0.133211	67.7109	10.1861	0.150435		66.0442	8.81887	0.13353	69.1896	7.73452	0.111787	68.3969	9.29664	0.135922	65.4414	9.13243	0.139551	71.6081	7.95242	0.111055	68.1976	9.96685	0.146147
ES12i	G	134	0	1	1	53.8924	21.1475	0.392402	55.7591	15.2854	0.274132	56.705	17.5974	0.310332	47.866	18.9074	0.395007	55.0462	16.0523	0.291615	54.5588	20.4534	0.374888		52.6665	16.6961	0.317016	58.2363	15.6079	0.26801	57.781	19.9397	0.345091	52.3023	16.9988	0.32501	61.2897	16.6632	0.271876	57.984	20.8795	0.36009
ES11d	A	135	2	1	-1	67.721	23.6502	0.349229	68.4719	18.1867	0.265609	69.6494	20.6311	0.296213	62.5567	22.0672	0.352755	67.3965	19.118	0.283665	67.4955	23.4845	0.347941		65.6707	20.1797	0.307287	68.1883	18.9813	0.278365	68.0016	23.2428	0.341798	65.1533	20.466	0.31412	70.8082	19.4967	0.275345	67.6759	24.4596	0.361423
	A	136	0	0	0	62.4201	37.5799	0.602047	69.2378	30.7622	0.444297	66.5949	33.4051	0.501618	63.2221	36.7779	0.581726	68.541	31.459	0.45898	63.7209	36.2791	0.569343		66.5309	33.4691	0.503062	70.8203	29.1797	0.412025	66.4081	33.5919	0.505841	66.6094	33.3906	0.501289	70.7433	29.2567	0.413561	65.7688	34.2312	0.520477
	A	137	0	0	0	77.0527	22.9473	0.297813	83.1453	16.8547	0.202714	80.3836	19.6164	0.244034	78.9809	21.0191	0.266129	82.3416	17.6584	0.214453	77.381	22.619	0.292308		80.325	19.675	0.244942	81.9505	18.0495	0.220248	77.0586	22.9414	0.297714	80.1073	19.8927	0.248326	81.1474	18.8526	0.232325	75.9619	24.0381	0.31645
	G	138	0	0	0	77.2817	22.7183	0.293968	83.2202	16.7798	0.201631	80.6894	19.3106	0.23932	79.2056	20.7944	0.262537	82.4944	17.5056	0.212204	77.8848	22.1152	0.283948		81.8416	18.1584	0.221872	83.075	16.925	0.203732	78.7163	21.2837	0.270385	81.7167	18.2833	0.223739	82.272	17.728	0.215481	77.6093	22.3907	0.288505
ES10i	A	139	0	1	1	76.0517	0.205005	0.00269561	71.802	0.120718	0.00168126	75.8279	0.225875	0.00297878	68.004	0.224744	0.00330487	71.769	0.193363	0.00269425	76.5968	0.223468	0.00291746		71.178	0.267101	0.00375258	75.2486	0.183675	0.00244091	79.9689	0.266818	0.00333653	71.0423	0.239117	0.00336584	79.0931	0.184396	0.00233139	81.2537	0.25958	0.00319469
ES9i	A	140	0	2	2	75.229	16.4617	0.218821	70.8155	15.7557	0.22249	74.9522	16.4889	0.219992	66.8825	18.3311	0.274079	70.8115	15.6687	0.221273	75.4469	16.3376	0.216544		70.1209	16.2796	0.232165	74.3504	12.6131	0.169644	78.7114	13.504	0.171563	69.9111	16.027	0.229248	78.3191	11.8196	0.150915	80.2462	12.6063	0.157096
ES8i	A	141	0	1	1	53.123	17.9286	0.337493	54.631	19.3814	0.35477	56.3158	16.6313	0.295323	46.9381	21.4642	0.457286	53.7768	18.9995	0.353303	54.0021	16.2238	0.300429		52.8815	18.7899	0.355321	58.1108	16.0581	0.276337	58.3838	13.1334	0.224949	52.4923	18.4427	0.35134	61.0352	13.8401	0.226756	58.7705	12.501	0.212708
	C	142	0	0	0	60.2157	39.7843	0.660698	65.8369	34.1631	0.518905	63.5369	36.4631	0.57389	59.3814	40.6186	0.684029	65.4004	34.5996	0.529041	60.7834	39.2166	0.645187		64.5231	35.4769	0.549833	68.7573	31.2427	0.454391	64.99	35.01	0.538698	64.4329	35.5671	0.552003	69.4447	30.5553	0.439994	64.9079	35.0921	0.540645
	A	143	0	0	0	99.9201	0.0798722	0.000799361	99.9209	0.0790909	0.000791535	99.8784	0.121625	0.00121773	99.8732	0.126836	0.00126997	99.9283	0.0717315	0.00071783	99.9065	0.0934503	0.000935378		99.8959	0.104124	0.00104233	99.9171	0.0828779	0.000829466	99.9086	0.0914099	0.000914936	99.908	0.0919681	0.000920528	99.8987	0.101288	0.00101391	99.9332	0.0668226	0.000668673
ES7d	C	144	1	0	-1	95.6257	0.0878594	0.000918785	93.3064	0.0749282	0.000803034	95.0377	0.11815	0.00124319	92.3765	0.126836	0.00137303	92.8799	0.0842066	0.000906618	95.1731	0.0771981	0.000811134		93.0576	0.0656435	0.000705407	94.0059	0.0895977	0.000953107	95.6766	0.0370581	0.000387327	92.6395	0.0674433	0.000728019	94.6109	0.0363599	0.000384309	95.9984	0.0359814	0.000374813
	G	145	0	0	0	99.7391	0.260916	0.00261598	99.7336	0.266411	0.00267123	99.7394	0.260625	0.00261306	99.6551	0.344904	0.00346098	99.6819	0.318114	0.00319129	99.7725	0.227531	0.0022805		99.6876	0.312373	0.00313351	99.7536	0.246394	0.00247002	99.7455	0.254465	0.00255115	99.6873	0.312692	0.00313672	99.826	0.174008	0.00174311	99.7995	0.200468	0.0020087
ES6d	A	146	3	1	-2	70.229	26.672	0.379786	71.8894	22.774	0.316792	73.2981	23.4111	0.319395	67.016	27.3364	0.407909	70.9425	23.2597	0.327867	70.8191	26.3327	0.37183		70.5894	24.2474	0.343498	72.5921	22.5473	0.310602	72.1471	24.7647	0.343252	70.1717	24.2213	0.345173	73.9404	21.6185	0.292378	71.5927	25.5494	0.356871
ES5i	G	147	0	2	2	93.0059	0.260916	0.00280537	88.5401	0.283062	0.00319699	92.7755	0.406575	0.00438235	87.6324	0.413885	0.00472297	88.3888	0.308757	0.00349317	93.0725	0.552576	0.00593705		88.372	0.353117	0.0039958	89.3625	0.259833	0.00290763	93.3691	0.390345	0.00418067	88.0411	0.3832	0.00435252	91.6346	0.220756	0.00240909	93.8009	0.390655	0.00416473
ES4i	A	148	0	1	1	93.4665	0.0292865	0.000313337	89.0313	0.0749282	0.000841593	93.4462	0.059075	0.000632182	88.4112	0.0912328	0.00103191	88.9315	0.0436627	0.00049097	93.9664	0.0325045	0.000345916		89.0126	0.0769614	0.000864612	89.7007	0.0447989	0.000499426	93.9521	0.0395286	0.000420732	88.7431	0.0613121	0.000690894	91.9645	0.0311656	0.000338887	94.3663	0.0334113	0.000354059
	A	149	0	0	0	99.9547	0.0452609	0.000452814	99.9126	0.0874162	0.000874927	99.9305	0.0694999	0.000695483	99.9332	0.0667557	0.000668003	99.9532	0.0467814	0.000468033	99.9309	0.069072	0.000691197		99.9389	0.0611164	0.000611538	99.9238	0.0761581	0.000762161	99.9358	0.064234	0.000642753	99.9295	0.0705089	0.000705586	99.9662	0.0337627	0.000337741	99.946	0.0539721	0.000540012
	G	150	0	0	0	99.9521	0.0479233	0.000479463	99.9625	0.0374641	0.000374781	99.9409	0.059075	0.000591099	99.9444	0.0556297	0.000556607	99.947	0.053019	0.000530471	99.9309	0.069072	0.000691197		99.9366	0.06338	0.000634202	99.9216	0.078398	0.000784595	99.9185	0.0815278	0.000815943	99.9326	0.0674433	0.000674888	99.9558	0.0441513	0.000441708	99.9486	0.051402	0.000514284
ES3i	A	151	0	2	2	97.9073	0.0266241	0.000271931	95.9414	0.0457895	0.000477265	97.7135	0.0938249	0.000960205	96.1571	0.0578549	0.000601671	95.5371	0.053019	0.000554957	98.1107	0.0731351	0.000745434		96.0772	0.0679071	0.000706797	95.9166	0.0492787	0.000513767	97.7024	0.103763	0.00106203	95.7174	0.0705089	0.000736636	96.177	0.0493455	0.00051307	97.8694	0.0950937	0.000971639
	G	152	0	0	0
	A	153	0	0	0
ES2d	A	154	4	3	-1
	G	155	0	0	0
	A	156	0	0	0
ES1i	A	157	0	1	1
	A	158	1	1	0
	A	159	0	0	0
	G	160	0	0	0
	A	161	0	0	0
	A	162	1	1	0
	G	163	1	1	0

## Sheet: RPS12_CorInc ratio_RNAi_RESC6IP
Supplementary Table S3. RPS12 Cor, Inc, and Ratio values: RESC6-IP libraries
Notes: See the suplementary table legend for additional details.
						KH2F1-RNAi - 0-4 Day - RESC6-IP																			KREH2-RNAi - 0-4 Day - RESC6-IP
						J07 - F1-RNAi 0 Day - RESC6-IP			J08 - F1-RNAi 3 Day - RESC6-IP			J09 - F1-RNAi 4 Day - RESC6-IP			J16 - F1-RNAi 0 Day - RESC6-IP - Bio Rep			J17 - F1-RNAi 3 Day - RESC6-IP - Bio Rep			J18 - F1-RNAi 4 Day - RESC6-IP - Bio Rep				J25 - H2-RNAi 0 Day - RESC6-IP			J26 - H2-RNAi 3 Day - RESC6-IP			J27 - H2-RNAi 4 Day - RESC6-IP			J34 - H2-RNAi 0 Day - RESC6-IP - Bio Rep			J35 - H2-RNAi 3 Day - RESC6-IP - Bio Rep			J36 - H2-RNAi 4 Day - RESC6-IP - Bio Rep
			Ts present before each T-stripped position			28777 Reads			21292 Reads			50858 Reads			24612 Reads			47424 Reads			42623 Reads				40477 Reads			28778 Reads			24045 Reads			38909 Reads			38006 Reads			45605 Reads
Canonical Editing Site (ES)	Sequence	T-stripped Position	pre-edited	edited	editing events: Ins (+), Del (-)	Correct %	Incorrect %	Ratio	Correct %	Incorrect %	Ratio	Correct %	Incorrect %	Ratio	Correct %	Incorrect %	Ratio	Correct %	Incorrect %	Ratio	Correct %	Incorrect %	Ratio		Correct %	Incorrect %	Ratio	Correct %	Incorrect %	Ratio	Correct %	Incorrect %	Ratio	Correct %	Incorrect %	Ratio	Correct %	Incorrect %	Ratio	Correct %	Incorrect %	Ratio
	C	1
	A	2
	A	3
	A	4
	C	5
	A	6
	C	7
	G	8
	A	9
	A	10
	A	11
	C	12
	A	13
	A	14
	A	15
	C	16	0	0	0
	A	17	1	1	0	5' UTR "Form B"
	A	18	0	0	0
	A	19	0	0	0
	G	20	0	0	0
	A	21	1	1	0
	A	22	0	0	0
ES76i	A	23	0	1	1
	A	24	0	0	0
	A	25	0	0	0
ES75i	G	26	0	4	4
ES74i	G	27	0	8	8
	C	28	0	0	0
	G	29	0	0	0
ES73i	A	30	0	1	1
ES72i	G	31	0	1	1	27.8903	0.792299	0.0284077	16.1892	0.413301	0.0255294	4.92351	0.141571	0.028754	20.5388	0.609459	0.0296736	10.1004	0.255145	0.025261	5.21549	0.140769	0.0269906		22.4844	1.4255	0.0633996	15.3103	0.635902	0.0415343	10.5136	0.499064	0.0474684	23.19	1.50094	0.0647235	19.1917	0.884071	0.0460653	10.0011	0.513102	0.0513045
ES71i	G	32	0	1	1	27.3587	0.809674	0.0295948	15.4894	0.817208	0.0527592	4.58335	0.344095	0.0750751	20.0918	0.666342	0.0331648	9.47621	0.558789	0.0589675	4.82134	0.31673	0.0656934		21.9829	1.44774	0.0658575	14.6258	0.861769	0.0589214	9.89811	0.856727	0.0865546	22.6529	1.54977	0.0684139	18.3839	1.11824	0.0608273	9.39151	0.820086	0.087322
	A	33	0	0	0	97.8594	2.1406	0.0218742	97.4967	2.50329	0.0256756	98.9146	1.08537	0.0109728	98.3748	1.62522	0.0165207	98.2562	1.74384	0.0177479	98.9865	1.01354	0.0102392		97.1243	2.87571	0.0296085	97.6614	2.33859	0.0239459	97.9455	2.05448	0.0209758	96.9853	3.01473	0.0310844	96.9505	3.04952	0.0314544	97.8336	2.16643	0.022144
ES70d	G	34	6	5	-1	26.2571	3.614	0.137639	14.6675	3.8606	0.263208	4.47717	1.90334	0.425121	19.1695	3.11637	0.162569	9.13251	2.8572	0.312861	4.71576	1.83704	0.389552		20.8069	4.74343	0.227974	14.0733	3.67642	0.261235	9.47806	3.42691	0.361562	21.3935	4.85749	0.227054	17.6235	4.66505	0.264706	8.95516	3.51935	0.392997
ES69i	A	35	0	1	1	28.4776	0.503875	0.0176937	16.9031	0.305279	0.0180606	5.18306	0.117976	0.0227618	20.9898	0.426621	0.0203252	10.4757	0.166582	0.0159018	5.4548	0.0914999	0.0167742		23.2502	0.8721	0.0375093	16.1026	0.347488	0.0215796	11.3412	0.270326	0.0238357	24.087	0.791591	0.0328638	20.1705	0.436773	0.0216541	10.6743	0.293827	0.0275267
ES68i	G	36	0	1	1	28.3768	0.54905	0.0193485	16.7434	0.314672	0.0187938	5.14767	0.135672	0.026356	20.9694	0.499756	0.0238326	10.3935	0.206646	0.0198823	5.35626	0.119654	0.022339		23.0551	1.02527	0.0444706	15.974	0.462159	0.0289319	11.1083	0.386775	0.0348184	23.8865	0.914955	0.0383043	19.9442	0.623586	0.0312665	10.4901	0.350839	0.0334448
ES67d	G	37	1	0	-1	28.4602	0.729749	0.025641	17.3586	0.577682	0.0332792	5.52126	0.22612	0.0409544	21.0507	0.633837	0.03011	10.9354	0.373229	0.0341304	5.70349	0.253384	0.0444262		23.2848	1.36374	0.0585676	16.5126	0.771423	0.0467172	11.6906	0.827615	0.0707933	23.9996	1.42127	0.0592204	20.531	1.14719	0.0558759	11.0624	0.763074	0.0689792
ES66i	G	38	0	2	2	28.2865	0.5699	0.0201474	16.781	0.568289	0.0338651	5.12604	0.296905	0.057921	20.8882	0.548513	0.0262595	10.3787	0.436488	0.0420561	5.38676	0.319077	0.0592334		23.0501	1.09445	0.0474812	15.908	0.778372	0.0489297	11.0002	0.885839	0.0805293	23.7246	1.1951	0.0503737	19.8995	1.00247	0.0503768	10.4133	0.789387	0.0758054
ES65i	G	39	0	2	2	28.1649	1.0425	0.0370142	16.6541	1.17415	0.070502	5.13194	0.493531	0.0961686	20.7988	0.812612	0.0390701	10.288	0.894062	0.0869031	5.34219	0.497384	0.093105		22.771	1.96655	0.0863622	15.8281	1.35173	0.0854007	10.9129	1.49719	0.137195	23.501	2.03552	0.0866142	19.6653	1.77867	0.0904469	10.2927	1.38143	0.134214
ES64i	A	40	0	3	3	27.8764	1.17802	0.0422588	16.2221	1.16006	0.0715113	4.88615	0.424712	0.0869215	20.5713	0.971071	0.0472052	10.0224	0.628374	0.0626972	5.05126	0.462192	0.0915002		22.4152	2.18643	0.0975422	15.4979	1.13281	0.0730942	10.4596	1.1936	0.114115	23.1283	2.05865	0.0890099	19.2759	1.42872	0.0741196	9.85418	1.15996	0.117713
	C	41	0	0	0	99.0757	0.924349	0.00932973	99.1452	0.854781	0.00862151	99.6107	0.389319	0.00390841	99.0614	0.938567	0.00947459	99.3927	0.607287	0.00610998	99.6387	0.361307	0.00362617		98.0285	1.97149	0.0201114	98.6135	1.38648	0.0140597	98.7939	1.20607	0.012208	98.1033	1.89673	0.019334	98.274	1.72604	0.0175636	98.9058	1.09418	0.0110628
ES63d	G	42	1	0	-1	29.8051	0.066025	0.00221523	20.4114	0.0328762	0.00161068	7.38134	0.0137638	0.00186468	22.2737	0.0365675	0.00164174	13.3624	0.0189777	0.00142023	7.58511	0.0046923	0.00061862		26.3952	0.148232	0.00561587	21.916	0.0451734	0.0020612	18.4321	0.0124766	0.000676895	26.855	0.123365	0.00459374	25.8012	0.0447298	0.00173363	15.2571	0.0175419	0.00114976
ES62i	G	43	0	4	4	27.8174	1.36915	0.0492192	14.536	1.30096	0.0894992	4.05246	0.464037	0.114508	20.4575	1.30424	0.0637537	8.84995	0.877193	0.0991184	4.22073	0.523192	0.123958		22.2941	2.51254	0.112699	14.3999	1.43512	0.0996622	9.13288	1.29341	0.141621	23.0461	2.37477	0.103044	18.1866	1.93127	0.106192	8.67229	1.18189	0.136283
ES61i	A	44	0	4	4	27.7027	1.36915	0.049423	14.4233	2.42345	0.168023	4.021	1.06178	0.264059	20.4534	1.19454	0.0584029	8.81199	1.61522	0.183297	4.18084	1.14492	0.27385		22.1681	2.95723	0.1334	14.2956	2.73125	0.191055	9.03722	2.70326	0.299126	22.9073	2.62407	0.114552	18.0156	2.99953	0.166496	8.57581	2.21028	0.257735
ES60i	G	45	0	3	3	29.044	1.10505	0.0380474	18.9038	1.35262	0.0715528	6.41984	0.639034	0.0995406	21.5667	0.975134	0.0452148	12.1352	0.938343	0.0773241	6.59268	0.65223	0.0989324		24.1372	3.0437	0.1261	18.5871	3.26291	0.175547	14.6309	3.30214	0.225696	24.6832	2.98389	0.120887	22.3202	3.33895	0.149593	12.4241	2.37693	0.191317
ES59i	A	46	0	4	4	28.0398	2.13712	0.0762176	15.4706	4.81871	0.311475	4.45948	2.53058	0.56746	20.685	1.89339	0.0915341	9.5458	3.55094	0.37199	4.68761	2.4963	0.532533		22.4943	4.7879	0.21285	15.0288	6.86288	0.456647	9.89395	7.90601	0.799075	23.1874	4.54394	0.195965	18.8049	6.92259	0.368126	9.2139	5.48186	0.594955
ES58i	G	47	0	1	1	28.0849	2.18925	0.077951	15.4988	4.73417	0.305455	4.4988	2.3949	0.532343	20.7622	1.94621	0.0937378	9.61328	3.39491	0.353148	4.73688	2.35319	0.496781		22.5733	4.89414	0.216811	15.1296	6.70999	0.4435	10.0354	7.64816	0.762122	23.2491	4.63646	0.199425	18.8996	6.88575	0.364332	9.3367	5.20996	0.558008
ES57i	A	48	0	2	2	28.1127	2.1267	0.0756489	15.3344	4.66372	0.304135	4.40835	2.18845	0.496432	20.7907	1.89745	0.0912644	9.50995	3.24098	0.340798	4.61488	2.19365	0.475343		22.6351	4.81261	0.212617	15.074	6.43895	0.427155	9.93138	7.06592	0.711474	23.2388	4.60819	0.198297	18.7839	6.68579	0.355932	9.25556	4.91613	0.531154
ES56i	A	49	0	2	2	30.1282	0.211975	0.00703576	19.6318	0.216044	0.0110048	6.31366	0.0983129	0.0155715	22.6272	0.134081	0.00592566	12.3925	0.126518	0.0102093	6.57157	0.0750768	0.0114245		27.3439	0.219878	0.0080412	20.9222	0.298839	0.0142833	16.0408	0.320233	0.0199637	27.7879	0.154206	0.00554939	24.904	0.331527	0.0133122	13.6016	0.245587	0.0180558
ES55i	A	50	0	1	1	29.8641	0.434375	0.014545	18.9649	0.765546	0.0403665	5.99709	0.344095	0.057377	22.3468	0.329108	0.0147273	11.9496	0.491312	0.0411152	6.29707	0.28623	0.0454545		25.37	2.16172	0.0852079	18.7053	2.26214	0.120936	14.1194	1.94219	0.137555	25.7447	2.15888	0.0838574	22.7517	2.26543	0.0995721	12.2245	1.49326	0.122152
ES54i	G	51	0	1	1	29.1483	0.948674	0.0325465	19.0964	0.887657	0.046483	6.64202	0.298871	0.044997	21.8227	0.788233	0.0361199	12.3081	0.537702	0.0436868	6.85311	0.2745	0.0400548		26.3137	0.948687	0.036053	20.7554	0.757523	0.0364976	16.8725	0.55313	0.0327828	26.6648	1.03318	0.038747	24.4488	0.863022	0.0352992	13.9897	0.506523	0.0362069
	A	52	0	0	0	99.2286	0.771449	0.00777447	98.8352	1.16476	0.0117848	99.5537	0.446341	0.00448342	99.3987	0.601333	0.00604971	99.2367	0.763327	0.00769198	99.5894	0.410576	0.00412269		97.3145	2.68548	0.0275958	97.2965	2.70345	0.0277857	97.7334	2.26658	0.0231915	97.3168	2.68318	0.0275716	97.2031	2.79693	0.0287741	98.1581	1.8419	0.0187647
	G	53	0	0	0	99.8193	0.1807	0.00181027	99.8544	0.145595	0.00145807	99.9292	0.0707853	0.000708355	99.7847	0.215342	0.00215807	99.8925	0.10754	0.00107656	99.946	0.0539615	0.000539906		99.6541	0.345875	0.00347076	99.7846	0.215442	0.00215908	99.8586	0.141402	0.00141602	99.6916	0.308412	0.00309366	99.7632	0.236805	0.00237367	99.8553	0.144721	0.00144931
ES53i	C	54	0	1	1	23.3798	0.031275	0.00133769	10.0742	0.023483	0.002331	2.99461	0.0137638	0.00459619	17.3533	0.0325045	0.0018731	6.47352	0.023195	0.00358306	3.15088	0.00703845	0.0022338		21.1824	0.0296465	0.00139958	13.135	0.0486483	0.0037037	8.71699	0.033271	0.00381679	21.4141	0.0385515	0.00180029	15.8764	0.0631479	0.00397746	7.74038	0.0394694	0.00509915
	C	55	0	0	0	99.9757	0.024325	0.000243309	99.9483	0.0516626	0.000516893	99.9371	0.0629203	0.000629599	99.9634	0.0365675	0.000365809	99.9072	0.09278	0.000928662	99.9484	0.0516153	0.00051642		99.9284	0.0716456	0.00071697	99.9375	0.0625478	0.000625869	99.9335	0.0665419	0.000665862	99.9589	0.0411216	0.000411385	99.9421	0.0578856	0.000579191	99.9298	0.0701677	0.00070217
	G	56	0	0	0	94.0404	5.95962	0.063373	92.0627	7.93725	0.0862157	97.3141	2.68591	0.0276004	95.425	4.575	0.0479435	95.1775	4.82245	0.050668	97.323	2.67696	0.0275059		94.676	5.32401	0.056234	94.2699	5.73007	0.0607837	94.8555	5.14452	0.0542354	94.6439	5.35609	0.056592	92.9853	7.01468	0.0754386	95.5729	4.42715	0.0463222
ES52d	C	57	2	0	-2	30.6669	0.260625	0.00849858	21.0971	0.258313	0.012244	7.88273	0.157301	0.0199551	23.0335	0.268162	0.0116423	14.0372	0.259362	0.0184768	8.13176	0.129038	0.0158684		28.048	0.380463	0.0135647	23.0628	0.385711	0.0167244	19.0809	0.407569	0.0213601	28.4793	0.377805	0.013266	26.6984	0.33942	0.0127131	15.9807	0.328911	0.0205818
	G	58	0	0	0	99.9375	0.06255	0.000625891	99.9812	0.0187864	0.000187899	99.9902	0.00983129	9.83226e-05	99.9269	0.0731351	0.000731886	99.9705	0.0295209	0.000295296	99.993	0.00703845	7.03895e-05		99.8493	0.150703	0.0015093	99.9236	0.0764473	0.000765058	99.9709	0.0291121	0.000291206	99.8869	0.113084	0.00113212	99.95	0.0499921	0.000500171	99.9649	0.0350839	0.000350962
	A	59	0	0	0	99.6734	0.32665	0.0032772	99.7793	0.22074	0.00221229	99.882	0.117976	0.00118115	99.7115	0.288477	0.00289312	99.768	0.23195	0.00232489	99.9296	0.0703845	0.000704341		99.5133	0.486696	0.00489076	99.5934	0.406561	0.0040822	99.6299	0.370139	0.00371514	99.5605	0.439487	0.00441427	99.6001	0.399937	0.00401543	99.6974	0.302598	0.00303517
ES51i	G	60	0	2	2	29.4854	1.17802	0.0399529	19.5566	1.50761	0.0770893	7.00971	0.83566	0.119215	22.1559	0.98326	0.0443792	12.7931	1.26096	0.098566	7.31295	0.830538	0.113571		26.8004	1.34397	0.0501475	21.6276	1.54979	0.0716581	17.8332	1.30588	0.0732276	27.1325	1.51636	0.0558871	25.225	1.59185	0.0631063	14.8427	1.19285	0.0803664
	C	61	0	0	0	99.7012	0.29885	0.00299746	99.7464	0.253616	0.00254261	99.8781	0.121908	0.00122057	99.7562	0.243784	0.00244379	99.806	0.193995	0.00194372	99.9062	0.093846	0.000939342		99.6022	0.397757	0.00399345	99.6212	0.378762	0.00380202	99.6091	0.390934	0.00392468	99.6222	0.377805	0.00379237	99.6369	0.363101	0.00364424	99.6777	0.322333	0.00323375
	C	62	0	0	0	99.9896	0.010425	0.000104261	100	0	0	100	0	0	99.9959	0.00406306	4.06322e-05	99.9831	0.0168691	0.000168719	99.9953	0.0046923	4.69252e-05		99.9876	0.0123527	0.000123542	99.9931	0.00694975	6.95024e-05	99.9875	0.0124766	0.000124782	99.9743	0.025701	0.000257076	99.9921	0.00789349	7.89411e-05	99.9956	0.00438548	4.38568e-05
	C	63	0	0	0	99.7811	0.218925	0.00219405	99.7417	0.258313	0.00258982	99.9017	0.0983129	0.000984097	99.8253	0.174712	0.00175017	99.8208	0.179234	0.00179556	99.9108	0.0891537	0.000892333		99.7332	0.266818	0.00267532	99.7012	0.298839	0.00299735	99.634	0.36598	0.00367325	99.7019	0.298132	0.00299023	99.6948	0.305215	0.00306149	99.75	0.249973	0.00250599
	A	64	0	0	0	99.5795	0.420475	0.0042225	99.629	0.371031	0.00372413	99.8643	0.135672	0.00135856	99.6262	0.373801	0.00375204	99.7617	0.238276	0.00238845	99.8803	0.119654	0.00119797		99.5059	0.494108	0.00496561	99.5448	0.455209	0.0045729	99.5508	0.449158	0.00451184	99.4166	0.583413	0.00586836	99.5843	0.415724	0.00417459	99.6711	0.328911	0.00329997
	G	65	0	0	0	99.1869	0.813149	0.00819816	99.1499	0.850085	0.00857373	99.3059	0.694089	0.00698941	99.1549	0.845116	0.00852319	99.0406	0.95943	0.00968724	99.2586	0.741384	0.00746921		98.8858	1.11421	0.0112677	98.9714	1.02856	0.0103925	99.3221	0.677896	0.00682522	98.9591	1.04089	0.0105184	99.1343	0.865653	0.00873212	99.1755	0.824471	0.00831325
ES50i	C	66	0	2	2	24.7142	0.364875	0.0147638	15.9497	0.187864	0.0117786	5.56255	0.0707853	0.0127253	18.5235	0.329108	0.0177671	10.1447	0.158148	0.0155893	5.74103	0.0727307	0.0126686		22.6548	0.518813	0.0229008	17.0373	0.378762	0.0222313	13.4955	0.232897	0.0172573	22.9767	0.503739	0.0219239	20.1731	0.307846	0.0152602	11.3562	0.217081	0.0191157
	C	67	0	0	0	94.2593	5.7407	0.0609032	95.3222	4.67781	0.0490737	98.1458	1.85418	0.0188921	95.5794	4.42061	0.0462506	96.6662	3.33376	0.0344873	98.1348	1.86519	0.0190064		94.7649	5.23507	0.0552427	94.1275	5.87254	0.0623892	94.5269	5.47307	0.0578996	94.5128	5.48716	0.0580573	93.6194	6.38057	0.0681544	95.6891	4.31093	0.0450514
	G	68	0	0	0	94.3566	5.6434	0.0598092	95.3222	4.67781	0.0490737	98.1163	1.88368	0.0191984	95.7663	4.23371	0.0442087	96.6241	3.37593	0.0349388	98.1325	1.86754	0.0190308		94.8218	5.17825	0.0546104	94.0441	5.95594	0.0633314	94.4354	5.56457	0.0589246	94.5565	5.44347	0.0575684	93.5405	6.45951	0.0690557	95.6496	4.3504	0.0454827
	G	69	0	0	0	95.8787	4.12135	0.042985	95.2799	4.72008	0.0495391	96.0262	3.97381	0.0413826	95.4372	4.56281	0.0478096	94.5386	5.46137	0.0577687	95.8192	4.18084	0.0436326		94.2189	5.78106	0.0613577	93.7174	6.28258	0.0670374	95.3753	4.62466	0.0484891	94.3715	5.62852	0.0596421	94.2509	5.74909	0.0609977	94.9523	5.04769	0.0531603
ES49i	A	70	0	1	1	31.2993	0.747124	0.0238703	21.4071	0.225437	0.0105309	7.89453	0.135672	0.0171856	23.8989	0.877621	0.0367222	14.2902	0.193995	0.0135753	8.08249	0.138423	0.0171263		29.3673	0.983274	0.033482	24.6056	0.375287	0.0152521	20.3826	0.212102	0.010406	29.8543	0.837852	0.0280647	28.3087	0.360469	0.0127335	17.1626	0.306984	0.0178868
	A	71	0	0	0	96.2818	3.71825	0.0386184	95.3175	4.68251	0.0491254	95.9357	4.06426	0.0423644	95.7785	4.22152	0.0440758	94.3952	5.60476	0.0593754	95.7535	4.24653	0.0443486		94.5747	5.4253	0.0573653	94.1622	5.83779	0.0619972	95.8037	4.1963	0.043801	94.8264	5.17361	0.0545588	94.6719	5.32811	0.0562797	95.4303	4.56967	0.0478849
	C	72	0	0	0	98.9714	1.0286	0.0103929	99.272	0.727973	0.00733311	99.5891	0.410948	0.00412644	99.0655	0.934503	0.00943319	99.3063	0.693742	0.00698588	99.6809	0.319077	0.00320098		98.6041	1.39585	0.0141561	98.888	1.11196	0.0112446	99.2057	0.794344	0.00800704	98.8178	1.18225	0.0119639	98.7476	1.25243	0.0126832	99.0242	0.97577	0.00985385
	C	73	0	0	0	99.5795	0.420475	0.0042225	99.8591	0.140898	0.00141097	99.9194	0.0806166	0.000806817	99.5571	0.442873	0.00444843	99.8419	0.158148	0.00158398	99.9179	0.0821153	0.000821828		99.4812	0.518813	0.00521519	99.8193	0.180694	0.00181021	99.8336	0.166355	0.00166632	99.5836	0.416356	0.00418097	99.8027	0.197337	0.00197727	99.8136	0.186383	0.00186731
	G	74	0	0	0	99.5517	0.448275	0.00450293	99.3566	0.643434	0.00647601	99.6461	0.353927	0.00355184	99.6099	0.390054	0.00391581	99.3822	0.617831	0.00621672	99.6927	0.307346	0.00308293		99.4491	0.55093	0.00553982	99.1382	0.861769	0.0086926	99.2972	0.702849	0.00707824	99.4834	0.51659	0.00519273	99.0081	0.991949	0.0100189	99.1996	0.800351	0.00806808
	A	75	0	0	0	98.1513	1.8487	0.0188352	98.8165	1.18354	0.0119772	99.1938	0.806166	0.00812718	98.0497	1.95027	0.0198906	98.7475	1.25253	0.0126842	99.2023	0.797691	0.00804106		97.4257	2.5743	0.0264232	98.1062	1.89381	0.0193037	98.5194	1.48056	0.0150281	97.6227	2.37734	0.0243524	97.8714	2.12861	0.0217491	98.2787	1.7213	0.0175145
	C	76	0	0	0	98.5926	1.40737	0.0142746	99.4505	0.549502	0.00552538	99.6146	0.385387	0.00386878	98.452	1.54803	0.0157237	99.4581	0.54192	0.00544872	99.6152	0.384769	0.00386255		97.9124	2.08761	0.0213212	98.9089	1.09111	0.0110315	99.2847	0.715325	0.00720479	98.0313	1.9687	0.0200823	98.9607	1.03931	0.0105022	99.1799	0.820086	0.00826867
	G	77	0	0	0	99.7741	0.225875	0.00226386	99.8873	0.112718	0.00112846	99.9587	0.0412914	0.000413085	99.7725	0.227531	0.0022805	99.9325	0.0674764	0.000675219	99.9578	0.0422307	0.000422486		99.7554	0.244583	0.00245183	99.8436	0.156369	0.00156614	99.9127	0.0873362	0.000874126	99.6864	0.313552	0.00314538	99.8579	0.142083	0.00142285	99.9057	0.0942879	0.000943769
ES48i	G	78	0	1	1	31.2785	1.24752	0.0398845	20.8059	0.572985	0.0275395	7.55633	0.292973	0.0387718	23.8055	1.11328	0.0467657	13.8327	0.590418	0.0426829	7.70945	0.246346	0.0319537		28.8337	1.5095	0.052352	23.3407	0.97644	0.0418342	19.0643	0.752755	0.0394852	29.258	1.41355	0.0483134	27.0326	1.22086	0.0451625	15.9566	0.855169	0.0535935
ES47i	A	79	0	1	1	30.3819	2.59582	0.0854398	20.5805	1.66729	0.0810132	7.35381	0.843525	0.114706	22.8466	2.79945	0.122532	13.6471	1.7586	0.128863	7.4983	0.825845	0.110138		27.9196	3.78734	0.135652	22.9828	2.76253	0.1202	18.8522	1.73425	0.0919921	28.2942	3.6187	0.127895	26.6721	2.96532	0.111177	15.5729	1.87479	0.120389
ES46i	G	80	0	2	2	29.5583	3.80512	0.128733	20.1061	5.92241	0.294557	7.07853	5.53109	0.781389	21.9568	3.88428	0.176906	13.0082	7.3486	0.564921	7.2238	5.54865	0.768107		26.8375	5.31413	0.198012	22.1106	7.94009	0.359107	18.2949	5.88064	0.321437	27.315	5.0631	0.185359	25.9854	7.27517	0.279972	15.0619	6.49709	0.431358
ES45i	A	81	0	1	1	30.8927	1.01122	0.0327334	20.9327	0.26301	0.0125645	7.5465	0.119942	0.0158937	23.2366	0.971071	0.0417905	13.839	0.193995	0.014018	7.70945	0.166577	0.0216068		28.6558	1.08951	0.0380205	23.6813	0.500382	0.0211299	19.5009	0.282803	0.014502	28.9984	1.09743	0.0378445	27.5009	0.476241	0.0173173	16.3206	0.293827	0.0180035
ES44i	G	82	0	1	1	37.8983	2.66532	0.0703283	32.1529	0.897051	0.0278995	18.9606	0.509261	0.0268589	31.2937	2.48253	0.07933	27.1424	0.72748	0.0268024	19.1071	0.518499	0.0271365		38.7529	2.98194	0.0769476	38.307	1.5081	0.0393687	31.0543	1.08131	0.0348199	38.9036	2.94533	0.0757085	40.2594	1.48661	0.0369257	28.6241	1.0284	0.0359277
	C	83	0	0	0	97.8803	2.11975	0.0216565	99.2251	0.774939	0.00780991	99.5242	0.475835	0.0047811	97.5906	2.40939	0.0246888	99.3822	0.617831	0.00621672	99.5097	0.490346	0.00492762		97.1836	2.81641	0.0289803	98.7803	1.21968	0.0123474	99.006	0.99397	0.0100395	97.489	2.51099	0.0257566	98.7976	1.20244	0.0121708	99.1383	0.861748	0.00869238
ES43d	C	84	2	0	-2	43.0761	1.63672	0.0379961	37.2299	0.756153	0.0203103	27.0734	0.894648	0.0330452	36.7666	1.62116	0.0440933	32.7324	0.672655	0.0205502	27.4758	0.990076	0.0360345		44.8008	2.01843	0.0450535	43.1997	0.98339	0.0227638	36.1115	1.06467	0.0294829	44.9973	1.90701	0.0423806	44.9929	0.999842	0.0222222	35.7702	1.07664	0.0300987
ES42d	G	85	4	0	-4	45.7449	1.5568	0.0340322	42.5794	1.07552	0.0252592	35.9373	0.880884	0.0245117	39.7977	1.76743	0.0444104	38.9613	0.936235	0.0240299	36.973	0.882153	0.0238594		48.0841	2.09502	0.0435699	46.8448	1.44555	0.0308582	41.0148	1.06051	0.0258568	48.1534	1.91472	0.039763	48.5265	1.24454	0.0256466	41.6643	1.06567	0.0255776
ES41i	A	86	0	1	1	35.8307	3.74952	0.104646	30.1663	1.31505	0.0435933	16.552	0.766841	0.0463293	28.9859	3.87209	0.133586	25	1.16397	0.0465587	16.7679	0.741384	0.0442144		36.1835	3.71322	0.102622	35.4159	1.77566	0.0501374	28.4883	1.22687	0.0430657	36.5006	3.6701	0.100549	37.4993	1.84971	0.0493264	25.5783	1.46914	0.0574368
ES40i	A	87	0	4	4	34.6561	6.33492	0.182794	28.87	5.10051	0.176672	15.6318	4.6502	0.297484	27.5435	6.35056	0.230565	23.6863	5.13031	0.216594	15.7966	4.59142	0.290658		34.5085	7.18927	0.208333	33.8766	6.50149	0.191917	27.2198	5.38158	0.197708	34.8685	7.17315	0.20572	35.8601	6.17797	0.17228	24.1311	6.12214	0.253703
ES39i	A	88	1	3	2	36.0322	7.43649	0.206384	30.9224	11.7321	0.379405	18.1702	17.9893	0.990044	29.1606	8.25207	0.282987	25.9447	12.7952	0.493173	18.3211	18.856	1.0292		35.8945	9.15829	0.255145	35.7078	10.1883	0.285325	29.2327	11.0667	0.378574	36.1819	9.11357	0.251882	37.5546	9.87739	0.263014	26.655	14.2068	0.532988
ES38i	A	89	0	1	1	38.152	7.30097	0.191365	32.1388	3.66804	0.114131	19.0314	2.60529	0.136894	31.5578	7.93922	0.251577	27.0327	3.82718	0.141576	19.154	2.42357	0.126531		39.0913	9.0817	0.23232	37.4036	6.23045	0.166574	30.4845	4.37513	0.14352	39.2608	8.99535	0.229118	39.1754	6.0622	0.154745	28.1636	4.93148	0.175101
ES37i	A	90	0	1	1	37.3249	5.9353	0.159017	32.2234	3.56942	0.110771	19.0413	2.51485	0.132074	30.5461	6.09052	0.199388	27.3047	3.42232	0.125338	19.161	2.37196	0.123791		37.9648	6.7841	0.178695	37.4348	5.41733	0.144714	30.6509	3.75962	0.122659	38.2893	6.72081	0.175527	39.1149	5.29653	0.13541	27.9421	4.09823	0.146669
	A	91	0	0	0	89.2345	10.7655	0.120643	93.8334	6.16664	0.065719	95.5877	4.41229	0.0461595	88.3878	11.6122	0.131378	93.7184	6.28163	0.0670267	95.8027	4.19726	0.0438115		86.1007	13.8993	0.16143	90.531	9.46904	0.104594	93.2086	6.79143	0.0728628	86.4916	13.5084	0.156182	90.7646	9.23538	0.101751	92.5798	7.42024	0.0801497
ES36i	G	92	0	4	4	33.36	11.954	0.358333	28.8324	6.19951	0.215019	16.4143	4.85666	0.295879	26.1986	13.2456	0.505583	23.545	6.24578	0.26527	16.4864	4.39434	0.266543		32.8285	14.7788	0.450181	33.1607	9.64973	0.290999	27.6315	7.03681	0.254666	33.0438	14.8243	0.448627	34.9103	9.5827	0.274495	24.7166	7.42243	0.300302
ES35i	G	93	0	3	3	33.8082	7.82917	0.231576	28.5459	4.37723	0.15334	15.7733	3.33084	0.211169	26.8162	8.38615	0.312727	23.2836	4.28053	0.183844	15.8952	3.13211	0.197048		33.3498	8.3183	0.249426	33.3345	5.71965	0.171583	27.5691	4.16719	0.151154	33.7891	8.42736	0.249411	35.3576	5.52807	0.156348	24.6289	4.57625	0.185808
	G	94	0	0	0	90.8642	9.13577	0.100543	93.2698	6.73023	0.0721587	95.1355	4.86452	0.0511326	90.6184	9.3816	0.103529	93.2692	6.73077	0.0721649	95.2842	4.71576	0.0494915		89.7547	10.2453	0.114148	92.2267	7.7733	0.0842847	94.6766	5.32335	0.0562267	89.8455	10.1545	0.113021	92.5512	7.44882	0.0804833	93.9722	6.02785	0.064145
	A	95	0	0	0	89.5403	10.4597	0.116816	93.1664	6.83355	0.0733478	94.699	5.30103	0.0559777	88.7209	11.2791	0.12713	92.9023	7.09767	0.0763993	94.8549	5.14511	0.0542419		88.5219	11.4781	0.129664	91.629	8.37098	0.0913573	94.5269	5.47307	0.0578996	88.4628	11.5372	0.130418	92.0591	7.94085	0.0862581	93.7704	6.22958	0.0664344
ES34i	G	96	0	1	1	36.0322	5.24725	0.145626	32.059	4.08135	0.127307	21.6131	3.81847	0.176674	28.9005	5.58671	0.193308	27.3511	4.36277	0.15951	21.3547	3.62011	0.169523		36.0254	6.37646	0.176999	36.7746	5.30266	0.144194	31.1083	3.90934	0.125668	36.4826	5.98576	0.164072	38.2255	5.0913	0.133191	28.6613	4.04561	0.141152
ES33i	G	97	0	2	2	40.0389	11.4883	0.286929	43.8005	8.09224	0.184752	36.9499	7.58189	0.205194	35.0561	12.2664	0.349907	39.9502	8.65174	0.216563	38.0546	7.20034	0.189211		40.8998	13.8844	0.339474	45.8267	10.4768	0.228617	39.2847	8.20961	0.208977	41.2964	13.9916	0.33881	46.048	9.80108	0.212845	39.7851	8.88061	0.223214
	C	98	0	0	0	86.6525	13.3475	0.154034	83.4961	16.5039	0.19766	81.4267	18.5733	0.228098	83.9347	16.0653	0.191403	82.2453	17.7547	0.215875	80.1703	19.8297	0.247344		85.7944	14.2056	0.165577	85.3464	14.6536	0.171695	88.4758	11.5242	0.130253	85.1834	14.8166	0.173938	86.6074	13.3926	0.154636	84.6749	15.3251	0.180987
	G	99	0	0	0	90.5828	9.41724	0.103963	88.9771	11.0229	0.123885	87.1859	12.8141	0.146975	88.5381	11.4619	0.129457	88.3941	11.6059	0.131298	85.9325	14.0675	0.163704		89.8362	10.1638	0.113137	91.0279	8.97213	0.0985647	92.4267	7.5733	0.0819384	89.2107	10.7893	0.120941	91.604	8.39604	0.0916559	89.3542	10.6458	0.119141
ES32i	G	100	0	2	2	38.7879	15.4186	0.397509	36.1169	19.3735	0.536411	27.7655	21.6367	0.779265	32.2851	17.979	0.556884	31.2837	21.0505	0.67289	27.1497	22.8234	0.84065		40.8528	16.7478	0.409954	40.4163	18.9033	0.467716	35.6415	14.8388	0.416336	40.7849	17.1631	0.42082	41.8644	16.7631	0.400415	33.2091	18.658	0.561836
ES31i	G	101	0	8	8	35.4623	19.109	0.538854	32.275	23.3609	0.723807	23.7092	25.758	1.08642	28.7461	21.9446	0.763392	27.1192	25.3606	0.935153	22.8844	27.1637	1.187		37.4385	20.4857	0.547182	37.0387	22.3643	0.603809	33.1088	17.5629	0.530461	37.2407	20.9463	0.562457	38.6623	20.2152	0.522866	30.1283	22.1971	0.736754
ES30i	G	102	0	2	2	48.5805	5.2542	0.108155	46.8063	8.48206	0.181216	39.0361	9.02513	0.231199	44.1573	5.68422	0.128727	42.5396	9.45513	0.222266	39.3285	9.46203	0.240589		51.3773	5.96141	0.116032	49.8923	9.50726	0.190556	43.273	7.17405	0.165786	51.8389	5.85469	0.11294	50.6788	7.94874	0.156845	43.6465	8.34119	0.191108
ES29i	A	103	0	4	4	39.3474	7.46082	0.189614	35.3184	10.6519	0.301596	24.9322	11.5911	0.464905	32.476	8.43897	0.259852	30.2864	11.7999	0.389612	24.1137	12.0029	0.497762		41.7793	7.48326	0.179114	40.5449	11.3281	0.279397	35.3587	8.27615	0.234063	41.5971	7.37876	0.177386	41.8513	9.95106	0.237772	32.7245	9.5779	0.292683
ES28i	G	104	0	2	2	40.1015	11.3841	0.283882	36.2155	11.037	0.304759	25.3411	11.772	0.464541	33.3536	14.0338	0.420758	31.1361	11.8295	0.379927	24.5407	12.7255	0.518547		41.8089	13.6423	0.326301	41.0035	10.7096	0.261186	35.5126	8.49657	0.239255	41.944	13.9428	0.332414	42.467	9.92212	0.233643	32.7771	11.4658	0.349813
	G	105	0	0	0	87.3892	12.6108	0.144306	88.7657	11.2343	0.126561	89.0007	10.9993	0.123586	84.4629	15.5371	0.183952	88.1389	11.8611	0.134573	87.9009	12.0991	0.137645		85.4041	14.5959	0.170905	89.1028	10.8972	0.122299	91.5409	8.45914	0.0924083	84.9084	15.0916	0.17774	89.6411	10.3589	0.11556	88.7008	11.2992	0.127386
ES27i	A	106	0	3	3	44.056	5.21945	0.118473	42.2224	4.04377	0.0957731	30.479	3.93645	0.129153	38.1724	6.16772	0.161575	38.3203	4.21938	0.110108	30.2114	4.34976	0.143978		45.6605	6.37893	0.139703	49.0548	4.25325	0.086704	40.6488	3.34789	0.0823614	45.5576	6.51777	0.143067	49.4843	3.82308	0.0772585	38.8532	3.9864	0.102602
	G	107	0	0	0	85.7873	14.2127	0.165674	86.0464	13.9536	0.162164	83.627	16.373	0.195787	82.4963	17.5037	0.212175	84.7672	15.2328	0.179701	83.0608	16.9392	0.203938		83.8081	16.1919	0.193202	87.9874	12.0126	0.136527	90.4096	9.59035	0.106077	83.4563	16.5437	0.198232	88.4729	11.5271	0.13029	87.5452	12.4548	0.142267
ES26i	A	108	0	2	2	46.704	5.8519	0.125298	50.1503	7.99831	0.159487	43.8849	10.5254	0.23984	41.2847	7.31757	0.177246	46.8265	8.65595	0.184852	44.171	10.7665	0.243746		47.8617	6.11952	0.127858	52.8529	5.22969	0.0989481	45.8474	4.79933	0.104681	47.8553	6.11684	0.12782	53.089	5.14919	0.0969916	44.5368	6.01469	0.13505
ES25i	G	109	0	1	1	56.3749	5.09087	0.0903039	59.5858	4.74826	0.0796879	54.6738	5.98333	0.109437	53.2504	6.05802	0.113765	56.9922	5.29479	0.0929037	55.5921	6.00849	0.108082		58.4702	6.45552	0.110407	61.0049	3.94051	0.0645933	52.3602	3.51009	0.0670373	58.66	6.52805	0.111286	60.8115	3.75993	0.0618294	53.4876	3.92282	0.0733407
ES24d	C	110	3	1	-2	58.651	7.47472	0.127444	61.2624	8.93293	0.145814	56.1898	10.6964	0.190363	55.9849	9.07687	0.162131	58.5927	9.86842	0.168424	57.3141	11.1653	0.194809		61.6498	9.27687	0.150477	63.135	9.7505	0.154439	54.0403	9.05386	0.167539	61.9188	9.45283	0.152665	62.8111	8.7723	0.139662	55.7439	10.3541	0.185745
	A	111	0	0	0	99.2876	0.712374	0.00717486	99.6008	0.399211	0.00400811	99.6638	0.33623	0.00337365	99.1874	0.812612	0.00819269	99.6141	0.385881	0.00387375	99.6387	0.361307	0.00362617		99.1378	0.862218	0.00869717	99.4371	0.56293	0.00566117	99.6049	0.395093	0.0039666	99.0259	0.974068	0.00983649	99.5159	0.484134	0.00486489	99.5549	0.445127	0.00447117
ES23i	A	112	0	2	2	54.9779	6.95694	0.126541	54.7248	6.74432	0.123241	47.5894	7.95155	0.167087	51.8121	7.83764	0.15127	51.5224	7.37812	0.143202	48.2275	8.37107	0.173575		57.991	7.45362	0.128531	59.0312	5.77177	0.0977749	48.7544	4.87419	0.0999744	58.8064	7.73857	0.131594	58.6539	5.12551	0.0873856	50.512	5.50159	0.108916
Es22i	A	113	0	3	3	53.991	7.91257	0.146553	58.623	6.28875	0.107274	54.1468	7.0805	0.130765	51.028	9.20283	0.180349	55.978	6.63377	0.118507	54.6395	7.20972	0.131951		55.1647	10.3738	0.188051	58.4023	7.8706	0.134765	49.8316	7.16989	0.143882	55.6632	10.6582	0.191477	58.4329	7.5146	0.128602	51.2751	7.80616	0.152241
Es21i	A	114	0	2	2	57.4521	8.58324	0.149398	62.0703	5.91302	0.0952633	57.2437	6.76393	0.11816	55.2088	9.7229	0.176111	59.4846	6.41026	0.107763	57.7787	7.38334	0.127787		59.498	11.0063	0.184985	62.3949	7.19647	0.115337	53.35	6.03036	0.113034	59.9373	11.0232	0.183911	62.3849	6.47529	0.103796	55.4106	6.34141	0.114444
ES20i	A	115	0	1	1	56.8093	10.279	0.18094	55.3259	6.96975	0.125976	48.3326	8.25632	0.170823	54.8107	11.1653	0.203706	52.1234	7.70496	0.147822	48.5747	8.78868	0.180931		58.7964	12.6813	0.215681	57.9644	9.2258	0.159163	48.4092	7.82283	0.161598	59.6546	12.8376	0.2152	58.1382	8.06978	0.138803	49.9024	8.52538	0.170841
	G	116	0	0	0	84.4911	15.5089	0.183557	88.08	11.92	0.135331	87.5654	12.4346	0.142004	82.1144	17.8856	0.217813	87.3587	12.6413	0.144705	87.0962	12.9038	0.148156		81.1671	18.8329	0.232027	84.8252	15.1748	0.178895	87.1533	12.8467	0.147404	80.5495	19.4505	0.241473	86.2837	13.7163	0.158967	85.5323	14.4677	0.169149
	A	117	0	0	0	87.3128	12.6872	0.145308	91.4945	8.50554	0.0929624	91.5589	8.44115	0.0921937	85.3364	14.6636	0.171833	90.916	9.08401	0.0999165	90.9837	9.01626	0.0990975		83.8995	16.1005	0.191902	87.2298	12.7702	0.146397	90.3182	9.68185	0.107197	83.4357	16.5643	0.198528	88.8807	11.1193	0.125104	88.4552	11.5448	0.130516
ES19d	G	118	3	0	-3	59.829	10.8246	0.180926	66.795	7.76348	0.116228	64.7253	6.77966	0.104745	58.3374	12.693	0.217579	65.0325	8.01704	0.123277	66.1052	7.74699	0.117192		61.6424	13.4867	0.218789	65.6335	10.4907	0.159837	59.7297	8.03493	0.134522	62.3249	14.0045	0.224701	66.0869	9.69321	0.146674	61.9976	9.24241	0.149077
	G	119	0	0	0	85.6239	14.3761	0.167898	91.5039	8.49615	0.0928502	92.483	7.51701	0.0812799	83.0327	16.9673	0.204345	91.1374	8.8626	0.0972444	91.7251	8.27488	0.0902138		81.9379	18.0621	0.220437	87.1082	12.8918	0.147997	91.5367	8.4633	0.092458	81.1021	18.8979	0.233014	88.7755	11.2245	0.126437	89.738	10.262	0.114356
	G	120	0	0	0	86.0444	13.9556	0.162191	90.3579	9.64212	0.10671	90.2592	9.74085	0.107921	84.0484	15.9516	0.18979	89.984	10.016	0.111309	89.2945	10.7055	0.11989		82.3702	17.6298	0.214031	85.4924	14.5076	0.169695	87.8603	12.1397	0.138171	81.9913	18.0087	0.219641	87.4388	12.5612	0.143657	85.6244	14.3756	0.167892
	G	121	1	1	0	82.2636	17.7364	0.215604	85.1681	14.8319	0.174148	84.1775	15.8225	0.187966	78.9452	21.0548	0.266701	84.5816	15.4184	0.18229	82.7675	17.2325	0.208203		78.7608	21.2392	0.269668	81.1905	18.8095	0.231671	82.3789	17.6211	0.213903	77.7378	22.2622	0.286376	82.4238	17.5762	0.213241	79.4825	20.5175	0.258138
	G	122	0	0	0	83.247	16.753	0.201244	87.0984	12.9016	0.148126	86.5193	13.4807	0.155811	81.119	18.881	0.232757	86.3866	13.6134	0.157586	84.7359	15.2641	0.180137		80.2085	19.7915	0.24675	82.3997	17.6003	0.213596	83.8511	16.1489	0.19259	79.4546	20.5454	0.25858	84.463	15.537	0.183951	81.3025	18.6975	0.229975
ES18i	G	123	0	1	1	66.2995	3.60357	0.054353	70.7026	2.56904	0.0363359	68.6146	2.71147	0.0395174	64.8952	4.29872	0.0662409	69.4079	2.64634	0.0381274	70.2156	3.19546	0.0455092		69.684	4.59767	0.0659789	72.816	3.48183	0.0478168	65.6436	2.58682	0.039407	70.485	5.06567	0.0718687	71.5966	3.26527	0.0456066	68.6876	3.31543	0.0482682
	G	124	0	0	0	84.0463	15.9537	0.189821	87.817	12.183	0.138731	88.4443	11.5557	0.130655	81.574	18.426	0.22588	87.1036	12.8964	0.148058	86.9577	13.0423	0.149984		81.2659	18.7341	0.230528	84.4256	15.5744	0.184475	87.3695	12.6305	0.144564	80.7577	19.2423	0.238273	85.6207	14.3793	0.167942	86.0871	13.9129	0.161615
ES17i	G	125	0	4	4	54.3281	14.8556	0.273442	62.6151	14.0898	0.225023	61.3905	14.5051	0.236276	51.3367	18.1578	0.3537	60.52	14.9397	0.246856	61.4246	16.0758	0.261717		55.7724	16.2636	0.291606	61.0154	14.7925	0.24244	54.4895	15.0884	0.276904	56.2029	17.307	0.307939	61.3061	14.6082	0.238283	56.0311	16.6429	0.29703
ES16i	G	126	0	2	2	72.2313	2.7105	0.0375253	76.4137	2.86023	0.0374309	76.049	2.98085	0.0391964	72.2534	3.157	0.0436934	75.2256	3.01324	0.0400561	77.4253	3.42303	0.0442108		75.8406	2.4903	0.032836	76.833	2.79728	0.0364072	69.7068	2.87378	0.0412267	77.1595	2.72431	0.0353074	75.8722	2.91533	0.0384242	73.6652	2.98213	0.0404822
	A	127	0	0	0	80.9744	19.0256	0.234958	84.5012	15.4988	0.183415	84.8893	15.1107	0.178005	77.6816	22.3184	0.287306	83.2321	16.7679	0.201459	82.8684	17.1316	0.206733		77.5107	22.4893	0.290145	79.3419	20.6581	0.260369	80.4991	19.5009	0.24225	76.4707	23.5293	0.30769	80.8241	19.1759	0.237255	78.3467	21.6533	0.276378
ES15i	A	128	0	3	3	64.8817	11.6065	0.178887	69.5801	10.6472	0.153021	70.0283	9.69169	0.138397	62.9043	14.237	0.226327	67.9803	11.4963	0.169112	70.5159	10.797	0.153114		67.1517	12.8962	0.192046	68.8234	12.4157	0.1804	61.1437	13.0422	0.213304	67.7478	13.7603	0.203111	67.7077	12.5243	0.184976	63.8833	14.073	0.220292
	C	129	0	0	0	93.3176	6.68242	0.0716094	94.458	5.54199	0.0586714	94.7363	5.26368	0.0555613	93.3813	6.61872	0.0708785	94.4416	5.55837	0.0588551	95.4109	4.58907	0.048098		94.2733	5.72671	0.0607458	94.1101	5.88992	0.0625854	91.2289	8.77105	0.0961433	94.6542	5.34581	0.0564772	93.7957	6.20428	0.0661468	91.6566	8.34338	0.0910287
	C	130	0	0	0	98.1027	1.89735	0.0193404	97.647	2.353	0.024097	97.6012	2.39884	0.0245779	97.4606	2.53941	0.0260558	97.4928	2.50717	0.0257164	97.0368	2.96319	0.0305368		97.2577	2.7423	0.0281962	96.8101	3.18994	0.0329505	97.4257	2.57434	0.0264236	96.9133	3.08669	0.03185	97.1899	2.81008	0.0289133	96.9828	3.01721	0.0311108
	C	131	0	0	0	99.093	0.906974	0.00915276	99.4082	0.591772	0.00595294	99.3669	0.633135	0.0063717	98.9842	1.01576	0.0102619	99.3147	0.685307	0.00690036	99.3126	0.687422	0.0069218		98.7054	1.29456	0.0131154	98.6483	1.35173	0.0137025	98.5028	1.49719	0.0151995	98.661	1.33902	0.0135719	98.6318	1.36821	0.0138718	98.4015	1.59851	0.0162448
ES14d	G	132	3	0	-3	75.4248	6.49477	0.0861092	85.1963	4.80462	0.0563947	85.3455	4.69149	0.0549706	74.6546	7.56948	0.101393	84.0967	5.14718	0.0612056	84.9987	5.06299	0.0595655		74.887	7.23374	0.0965954	80.9542	6.51887	0.0805254	80.1955	7.4818	0.0932946	75.6329	7.07034	0.0934824	81.8713	6.49371	0.0793161	81.274	7.8259	0.0962903
ES13d	G	133	4	0	-4	70.0733	8.69444	0.124076	76.3714	10.7552	0.140828	75.3824	11.8211	0.156816	67.7109	10.1861	0.150435	74.7259	11.3297	0.151617	74.4363	12.2985	0.165222		68.3969	9.29664	0.135922	72.9099	9.59066	0.131541	69.8565	12.4392	0.178068	68.1976	9.96685	0.146147	73.841	9.97211	0.135048	69.6678	12.7464	0.18296
ES12i	G	134	0	1	1	56.705	17.5974	0.310332	58.2754	14.8272	0.254433	55.8398	15.7025	0.281207	54.5588	20.4534	0.374888	56.9669	15.9286	0.279612	55.7516	16.7093	0.29971		57.781	19.9397	0.345091	57.3667	17.8609	0.311345	50.9711	18.8937	0.370676	57.984	20.8795	0.36009	58.425	16.5079	0.282549	51.4088	20.9122	0.406782
ES11d	A	135	2	1	-1	69.6494	20.6311	0.296213	75.5918	18.6173	0.246288	73.7209	21.0606	0.28568	67.4955	23.4845	0.347941	73.6589	20.0763	0.272558	72.8456	22.1547	0.304132		68.0016	23.2428	0.341798	71.9438	21.9508	0.30511	67.9892	24.9366	0.366773	67.6759	24.4596	0.361423	72.7622	20.7888	0.285709	68.3872	26.3348	0.385084
	A	136	0	0	0	66.5949	33.4051	0.501618	65.6772	34.3228	0.522597	64.0784	35.9216	0.560588	63.7209	36.2791	0.569343	64.9439	35.0561	0.53979	63.2569	36.7431	0.580855		66.4081	33.5919	0.505841	64.2887	35.7113	0.555483	61.1146	38.8854	0.636271	65.7688	34.2312	0.520477	65.7975	34.2025	0.519814	59.0286	40.9714	0.694094
	A	137	0	0	0	80.3836	19.6164	0.244034	84.3087	15.6913	0.186118	83.7115	16.2885	0.194579	77.381	22.619	0.292308	82.9875	17.0125	0.205001	82.0402	17.9598	0.218914		77.0586	22.9414	0.297714	79.6824	20.3176	0.254982	78.8605	21.1395	0.268062	75.9619	24.0381	0.31645	80.9241	19.0759	0.235726	76.5684	23.4316	0.306023
	G	138	0	0	0	80.6894	19.3106	0.23932	85.3513	14.6487	0.171628	84.6121	15.3879	0.181865	77.8848	22.1152	0.283948	84.1177	15.8823	0.18881	83.0303	16.9697	0.20438		78.7163	21.2837	0.270385	82.1044	17.8956	0.217962	81.4722	18.5278	0.227412	77.6093	22.3907	0.288505	83.3974	16.6026	0.199079	79.3071	20.6929	0.260921
ES10i	A	139	0	1	1	75.8279	0.225875	0.00297878	71.6748	0.192561	0.00268659	69.2536	0.104212	0.00150478	76.5968	0.223468	0.00291746	71.6367	0.130735	0.00182498	71.2221	0.0961922	0.00135059		79.9689	0.266818	0.00333653	75.6064	0.198068	0.00261973	70.4762	0.245373	0.00348165	81.2537	0.25958	0.00319469	75.4355	0.223649	0.00296477	73.0665	0.252165	0.00345117
ES9i	A	140	0	2	2	74.9522	16.4889	0.219992	70.6322	21.1159	0.298956	68.2135	22.3485	0.327626	75.4469	16.3376	0.216544	70.5297	20.5086	0.29078	70.164	21.3359	0.304086		78.7114	13.504	0.171563	74.4597	17.3987	0.233666	69.4822	20.2953	0.292093	80.2462	12.6063	0.157096	74.2093	17.4657	0.235357	72.0447	20.1776	0.280071
ES8i	A	141	0	1	1	56.3158	16.6313	0.295323	56.4954	20.4866	0.362624	53.7064	21.794	0.405799	54.0021	16.2238	0.300429	55.3264	20.0447	0.362299	53.9192	20.8057	0.385867		58.3838	13.1334	0.224949	57.5752	16.947	0.294345	51.4535	19.11	0.371403	58.7705	12.501	0.212708	58.5302	16.8131	0.287256	52.014	18.9541	0.364403
	C	142	0	0	0	63.5369	36.4631	0.57389	60.0319	39.9681	0.66578	56.8229	43.1771	0.759853	60.7834	39.2166	0.645187	59.1599	40.8401	0.690334	57.1569	42.8431	0.749569		64.99	35.01	0.538698	61.7312	38.2688	0.619927	56.0283	43.9717	0.784813	64.9079	35.0921	0.540645	63.0269	36.9731	0.586624	55.2944	44.7056	0.808502
	A	143	0	0	0	99.8784	0.121625	0.00121773	99.9483	0.0516626	0.000516893	99.9213	0.0786504	0.000787123	99.9065	0.0934503	0.000935378	99.9325	0.0674764	0.000675219	99.9038	0.0961922	0.000962848		99.9086	0.0914099	0.000914936	99.9514	0.0486483	0.00048672	99.921	0.0790185	0.00079081	99.9332	0.0668226	0.000668673	99.929	0.0710414	0.000710919	99.9408	0.059204	0.000592391
ES7d	C	144	1	0	-1	95.0377	0.11815	0.00124319	97.3042	0.0187864	0.000193069	97.8941	0.0235951	0.000241027	95.1731	0.0771981	0.000811134	97.0943	0.0400641	0.000412631	97.6914	0.0305	0.000312207		95.6766	0.0370581	0.000387327	96.8587	0.0382236	0.000394633	96.6396	0.0207943	0.000215174	95.9984	0.0359814	0.000374813	96.6742	0.0236805	0.000244951	97.6735	0.0394694	0.000404095
	G	145	0	0	0	99.7394	0.260625	0.00261306	99.8638	0.136201	0.00136387	99.9056	0.0943804	0.000944696	99.7725	0.227531	0.0022805	99.9009	0.0991059	0.000992043	99.8991	0.100884	0.00100986		99.7455	0.254465	0.00255115	99.861	0.138995	0.00139189	99.842	0.158037	0.00158287	99.7995	0.200468	0.0020087	99.8158	0.184181	0.00184521	99.864	0.13595	0.00136135
ES6d	A	146	3	1	-2	73.2981	23.4111	0.319395	82.1341	15.9731	0.194476	82.3961	16.2551	0.19728	70.8191	26.3327	0.37183	80.7039	17.314	0.214538	80.4753	18.0959	0.224862		72.1471	24.7647	0.343252	78.3168	19.5636	0.2498	77.251	20.6114	0.26681	71.5927	25.5494	0.356871	79.3296	18.284	0.230481	76.7767	21.5854	0.281145
ES5i	G	147	0	2	2	92.7755	0.406575	0.00438235	96.2756	0.601165	0.00624421	96.8736	0.733415	0.00757084	93.0725	0.552576	0.00593705	96.0674	0.630482	0.00656292	96.7037	0.753115	0.00778786		93.3691	0.390345	0.00418067	95.6946	0.535131	0.00559207	95.2797	0.752755	0.00790048	93.8009	0.390655	0.00416473	95.1744	0.665684	0.00699436	96.6583	0.65563	0.00678297
ES4i	A	148	0	1	1	93.4462	0.059075	0.000632182	97.1163	0.023483	0.000241803	97.8076	0.0353927	0.00036186	93.9664	0.0325045	0.000345916	96.9973	0.0379555	0.000391304	97.6421	0.0281538	0.000288337		93.9521	0.0395286	0.000420732	96.4105	0.0208493	0.000216255	96.3402	0.0831774	0.000863371	94.3663	0.0334113	0.000354059	96.069	0.0131558	0.000136941	97.4104	0.0394694	0.000405186
	A	149	0	0	0	99.9305	0.0694999	0.000695483	99.9671	0.0328762	0.00032887	99.9666	0.0334264	0.000334376	99.9309	0.069072	0.000691197	99.9388	0.0611505	0.000611879	99.946	0.0539615	0.000539906		99.9358	0.064234	0.000642753	99.9514	0.0486483	0.00048672	99.9376	0.062383	0.00062422	99.946	0.0539721	0.000540012	99.9579	0.0420986	0.000421163	99.9496	0.0504331	0.000504585
	G	150	0	0	0	99.9409	0.059075	0.000591099	99.9389	0.0610558	0.000610931	99.9489	0.0511227	0.000511489	99.9309	0.069072	0.000691197	99.9325	0.0674764	0.000675219	99.9413	0.0586538	0.000586882		99.9185	0.0815278	0.000815943	99.9201	0.0799222	0.000799861	99.9376	0.062383	0.00062422	99.9486	0.051402	0.000514284	99.9053	0.0947219	0.000948117	99.9189	0.0811315	0.000811973
ES3i	A	151	0	2	2	97.7135	0.0938249	0.000960205	98.3703	0.0845388	0.000859394	98.9028	0.0629203	0.000636183	98.1107	0.0731351	0.000745434	98.4628	0.0632591	0.000642467	98.902	0.100884	0.00102005		97.7024	0.103763	0.00106203	98.2	0.0625478	0.000636943	98.1909	0.095654	0.000974163	97.8694	0.0950937	0.000971639	97.9556	0.0605168	0.000617798	98.476	0.0920952	0.000935204
	G	152	0	0	0
	A	153	0	0	0
ES2d	A	154	4	3	-1
	G	155	0	0	0
	A	156	0	0	0
ES1i	A	157	0	1	1
	A	158	1	1	0
	A	159	0	0	0
	G	160	0	0	0
	A	161	0	0	0
	A	162	1	1	0
	G	163	1	1	0

## Sheet: RPS12_CorInc ratio_mtRNA
Supplementary Table S3. RPS12 Cor, Inc, and Ratio values; mtRNA libraries
Notes: See the suplementary table legend for additional details.
						KH2F1-RNAi - 0-4 Day - mtRNA																			KREH2-RNAi - 0-4 Day - mtRNA
						J01 - F1-RNAi 0 Day - mtRNA			J02 - F1-RNAi 3 Day - mtRNA			J03 - F1-RNAi 4 Day - mtRNA			J10 - F1-RNAi 0 Day - mtRNA - Bio Rep			J11 - F1-RNAi 3 Day - mtRNA - Bio Rep			J12 - F1-RNAi 4 Day - mtRNA - Bio Rep				J19 - H2-RNAi 0 Day - mtRNA			J20 - H2-RNAi 3 Day - mtRNA			J21 - H2-RNAi 4 Day - mtRNA			J28 - H2-RNAi 0 Day - mtRNA - Bio Rep			J29 - H2-RNAi 3 Day - mtRNA - Bio Rep			J30 - H2-RNAi 4 Day - mtRNA - Bio Rep
			Ts present before each T-stripped position			37560 Reads			26547 Reads			32473 Reads			44940 Reads			45718 Reads			51301 Reads				44178 Reads			28782 Reads			48729 Reads			32620 Reads			33043 Reads			44318 Reads
Canonical Editing Site (ES)	Sequence	T-stripped Position	pre-edited	edited	editing events: Ins (+), Del (-)	Correct %	Incorrect %	Ratio	Correct %	Incorrect %	Ratio	Correct %	Incorrect %	Ratio	Correct %	Incorrect %	Ratio	Correct %	Incorrect %	Ratio	Correct %	Incorrect %	Ratio		Correct %	Incorrect %	Ratio	Correct %	Incorrect %	Ratio	Correct %	Incorrect %	Ratio	Correct %	Incorrect %	Ratio	Correct %	Incorrect %	Ratio	Correct %	Incorrect %	Ratio
	C	1
	A	2
	A	3
	A	4
	C	5
	A	6
	C	7
	G	8
	A	9
	A	10
	A	11
	C	12
	A	13
	A	14
	A	15
	C	16	0	0	0
	A	17	1	1	0
	A	18	0	0	0
	A	19	0	0	0
	G	20	0	0	0
	A	21	1	1	0
	A	22	0	0	0
ES76i	A	23	0	1	1
	A	24	0	0	0
	A	25	0	0	0
ES75i	G	26	0	4	4
ES74i	G	27	0	8	8
	C	28	0	0	0
	G	29	0	0	0
ES73i	A	30	0	1	1
ES72i	G	31	0	1	1	7.71299	0.43131	0.0559199	1.19034	0.0828719	0.0696203	1.29954	0.0923844	0.07109	5.6186	0.431687	0.0768317	2.13045	0.124677	0.0585216	0.994133	0.0799205	0.0803922		11.0326	1.30382	0.118178	5.14905	0.448197	0.0870445	3.56461	0.287303	0.0805987	9.97854	1.27529	0.127803	5.85298	0.481191	0.082213	2.70545	0.241437	0.089241
ES71i	G	32	0	1	1	7.5426	0.460596	0.061066	1.06603	0.124308	0.116608	1.12401	0.17553	0.156164	5.48064	0.427236	0.0779537	1.93141	0.234043	0.121178	0.853785	0.163739	0.191781		10.641	1.29703	0.121889	4.65569	0.677507	0.145522	3.32246	0.435059	0.130945	9.71183	1.25077	0.128788	5.4535	0.662773	0.121532	2.42114	0.354258	0.146319
	A	33	0	0	0	98.951	1.04899	0.0106011	99.4877	0.512299	0.00514937	99.5442	0.455763	0.0045785	99.0832	0.916778	0.00925261	99.2869	0.713067	0.00718188	99.5263	0.473675	0.00475929		97.8134	2.18661	0.0223549	98.4087	1.59127	0.01617	98.8118	1.1882	0.0120249	97.897	2.103	0.0214818	98.4596	1.54042	0.0156452	98.9846	1.01539	0.010258
ES70d	G	34	6	5	-1	7.34558	1.97817	0.2693	1.27698	1.08864	0.852507	1.29646	1.05318	0.812352	5.41389	1.69559	0.313194	2.08889	1.35614	0.649215	1.03507	1.05456	1.01883		10.4464	3.51306	0.336295	4.64526	2.68918	0.578908	3.28552	2.30869	0.702686	9.44819	3.49172	0.369565	5.33245	2.63899	0.494892	2.53847	2.05109	0.808
ES69i	A	35	0	1	1	8.25346	0.290202	0.0351613	1.41259	0.0602705	0.0426667	1.47507	0.0646691	0.0438413	6.11704	0.23587	0.0385595	2.50011	0.0721816	0.0288714	1.18711	0.0506813	0.0426929		11.7638	0.826203	0.0702328	5.73622	0.295323	0.0514839	4.22746	0.233947	0.0553398	10.6898	0.8645	0.0808718	6.5672	0.308689	0.0470046	3.23796	0.157949	0.0487805
ES68i	G	36	0	1	1	8.17359	0.399361	0.0488599	1.42389	0.0678043	0.047619	1.45352	0.0862255	0.059322	5.94571	0.311526	0.0523952	2.44761	0.120303	0.049151	1.2222	0.0467827	0.0382775		11.6529	0.952963	0.0817793	5.65284	0.354388	0.0626921	4.13511	0.260625	0.0630273	10.5702	0.953403	0.0901972	6.30391	0.429743	0.0681709	3.11837	0.173744	0.0557164
ES67d	G	37	1	0	-1	8.30138	0.615016	0.074086	1.70264	0.146909	0.0862832	1.81689	0.166292	0.0915254	6.05696	0.571874	0.0944159	2.72103	0.286539	0.105305	1.50484	0.146196	0.0971503		11.8113	1.25175	0.105979	6.11841	0.740046	0.120954	4.58659	0.605389	0.131991	10.7572	1.34273	0.124822	6.81839	0.850407	0.124723	3.53581	0.512207	0.144863
ES66i	G	38	0	2	2	8.1656	0.479233	0.0586893	1.43142	0.188345	0.131579	1.45352	0.243279	0.167373	5.94793	0.465065	0.0781893	2.43668	0.325911	0.133752	1.18516	0.214421	0.180921		11.4944	1.06388	0.0925561	5.47217	0.736571	0.134603	4.04277	0.625911	0.154822	10.3955	1.168	0.112356	6.33417	0.811064	0.128046	3.00781	0.568618	0.189047
ES65i	G	39	0	2	2	8.13898	0.846645	0.104024	1.40129	0.339021	0.241935	1.4258	0.388015	0.272138	5.98353	0.678683	0.113425	2.44543	0.505271	0.206619	1.18126	0.335276	0.283828		11.4061	1.84481	0.161738	5.4687	1.16045	0.212198	4.01609	1.01787	0.253449	10.2728	1.86695	0.181737	6.2797	1.30739	0.208193	2.97622	0.88226	0.296437
ES64i	A	40	0	3	3	7.9606	0.881257	0.110702	1.26191	0.335254	0.265672	1.34265	0.341822	0.254587	5.81219	0.772141	0.132848	2.32731	0.398093	0.171053	1.06431	0.307986	0.289377		11.1662	1.94667	0.174336	5.25676	0.882496	0.167878	3.78419	0.853701	0.225597	10.0092	2.06009	0.205819	6.02548	1.07738	0.178805	2.7957	0.676926	0.242131
	C	41	0	0	0	98.7327	1.26731	0.0128357	99.4613	0.538667	0.00541585	99.5812	0.418809	0.00420571	99.1077	0.892301	0.00900335	99.2804	0.719629	0.00724845	99.5868	0.413247	0.00414962		97.6889	2.31111	0.0236578	98.645	1.35501	0.0137363	98.8631	1.1369	0.0114997	97.6426	2.35745	0.0241437	98.3779	1.62213	0.0164888	99.12	0.880004	0.00887816
ES63d	G	42	1	0	-1	11.1262	0.0878594	0.00789663	4.50145	0.0150676	0.00334728	4.74856	0.00615896	0.00129702	8.03961	0.0600801	0.00747301	7.00162	0.0109366	0.00156201	4.79133	0.00194928	0.000406835		15.8337	0.0814885	0.00514653	12.5043	0.0138976	0.00111142	11.9251	0.0287303	0.00240922	14.9724	0.0980993	0.00655201	14.0756	0.0514481	0.00365513	9.39347	0.0203078	0.0021619
ES62i	G	43	0	4	4	7.86475	1.8344	0.233243	1.0472	0.478397	0.456835	1.00391	0.406492	0.404908	5.79217	1.31286	0.226662	1.91609	0.724004	0.377854	0.773864	0.385957	0.498741		10.8697	2.77061	0.254894	4.68696	1.45577	0.3106	3.1275	1.01377	0.324147	9.86511	2.77437	0.281231	5.34758	1.64029	0.306735	2.28801	0.936414	0.40927
ES61i	A	44	0	4	4	7.80618	2.03408	0.260573	1.0472	1.07733	1.02878	0.970037	1.00083	1.03175	5.76101	1.28393	0.222866	1.90516	1.59893	0.839265	0.746574	1.05261	1.40992		10.7429	3.37951	0.314581	4.59662	2.71003	0.589569	3.05362	2.23276	0.731183	9.66278	3.52851	0.365165	5.21442	3.00518	0.57632	2.24288	1.68555	0.751509
ES60i	G	45	0	3	3	10.2423	1.44569	0.141149	3.63506	0.674276	0.185492	3.68306	0.65593	0.178094	7.31197	1.10147	0.150639	5.64548	1.09147	0.193336	3.5126	0.695893	0.198113		13.4207	3.33198	0.248271	8.99868	3.25898	0.362162	8.20251	3.14392	0.383287	12.3391	3.40282	0.275776	10.2896	3.6619	0.355882	6.31346	2.38729	0.378127
ES59i	A	46	0	4	4	8.33333	3.6475	0.4377	1.5143	2.78751	1.8408	1.34265	2.89471	2.15596	6.01691	2.55674	0.424926	2.47824	4.26528	1.72109	1.15397	2.95316	2.55912		11.2183	5.72457	0.510291	5.31582	7.04607	1.32549	3.67953	7.56428	2.05577	10.1196	5.83078	0.576189	6.07088	7.97748	1.31406	2.73929	5.87572	2.14498
ES58i	G	47	0	1	1	8.52503	3.57029	0.418801	1.61977	2.6067	1.6093	1.48431	2.58676	1.74274	6.11037	2.53004	0.414057	2.65541	3.9678	1.49423	1.32356	2.5711	1.94256		11.293	5.797	0.513329	5.47217	6.8793	1.25714	3.97299	7.0102	1.76446	10.2299	5.90435	0.577165	6.23733	7.75051	1.2426	2.9717	5.46956	1.84055
ES57i	A	48	0	2	2	8.54366	3.6049	0.421938	1.55196	2.40328	1.54854	1.39808	2.34656	1.67841	6.13262	2.51669	0.410377	2.56354	3.69657	1.44198	1.17931	2.24947	1.90744		11.3405	5.79021	0.510579	5.35057	6.67431	1.2474	3.81703	6.42738	1.68387	10.2606	5.92275	0.577233	6.24035	7.54169	1.20854	2.87017	4.89869	1.70676
ES56i	A	49	0	2	2	12.0634	0.22098	0.0183183	3.47685	0.0866388	0.0249187	3.29505	0.104702	0.0317757	8.57365	0.149088	0.017389	5.63235	0.183735	0.0326214	2.90053	0.115008	0.0396505		17.0198	0.208248	0.0122357	11.4203	0.264054	0.0231214	9.17729	0.250364	0.0272809	16.0178	0.22992	0.0143541	13.0012	0.3329	0.0256052	6.86403	0.207591	0.0302433
ES55i	A	50	0	1	1	11.5096	0.756124	0.0656951	3.01352	0.42566	0.14125	2.96862	0.351061	0.118257	8.19315	0.542946	0.0662683	4.9696	0.651822	0.131162	2.64712	0.315783	0.119293		14.4099	2.84757	0.197612	9.03342	2.35216	0.260385	7.33444	1.87978	0.256295	13.1852	3.11465	0.236224	10.3774	2.62991	0.253427	5.47859	1.4757	0.269357
ES54i	G	51	0	1	1	11.6427	0.625666	0.0537389	4.01552	0.135609	0.0337711	4.23737	0.083146	0.0196221	8.26435	0.456164	0.0551966	6.27324	0.273415	0.0435844	4.07399	0.13645	0.0334928		16.4471	0.660962	0.0401872	11.7435	0.503787	0.0428994	10.6836	0.299616	0.0280446	15.5365	0.68363	0.0440016	13.4673	0.472112	0.0350562	8.31491	0.279796	0.0336499
	A	52	0	0	0	98.9457	1.05431	0.0106555	99.5555	0.444495	0.00446479	99.6705	0.329505	0.00330594	99.2679	0.732087	0.00737486	99.3569	0.643073	0.00647235	99.7018	0.29824	0.00299132		96.8695	3.13052	0.0323169	97.6131	2.38691	0.0244527	98.0894	1.91057	0.0194778	96.5757	3.42428	0.0354569	97.3943	2.6057	0.0267541	98.522	1.47795	0.0150013
	G	53	0	0	0	99.5607	0.439297	0.00441235	99.9473	0.0527367	0.000527645	99.9661	0.0338743	0.000338858	99.733	0.267023	0.00267738	99.8928	0.107179	0.00107294	99.9454	0.0545798	0.000546096		99.6356	0.364435	0.00365768	99.7985	0.201515	0.00201922	99.842	0.158017	0.00158267	99.5371	0.462906	0.00465059	99.767	0.23303	0.00233574	99.8353	0.164719	0.0016499
ES53i	C	54	0	1	1	7.42013	0.0319489	0.00430571	1.33725	0	0	1.12093	0.00307948	0.00274725	5.28037	0.0267023	0.00505689	2.08452	0.0262479	0.0125918	0.927857	0.0097464	0.0105042		12.1237	0.0497985	0.00410754	5.93426	0.0416927	0.00702576	4.18642	0.0266782	0.00637255	11.4071	0.0398529	0.00349368	6.71247	0.0302636	0.00450857	3.15447	0.0315899	0.0100143
	C	55	0	0	0	99.9228	0.0772098	0.000772695	99.9473	0.0527367	0.000527645	99.9784	0.0215564	0.00021561	99.9644	0.035603	0.000356157	99.9366	0.0634323	0.000634726	99.9591	0.0409349	0.000409516		99.9525	0.047535	0.000475576	99.9514	0.0486415	0.000486652	99.9384	0.061565	0.000616029	99.9295	0.0705089	0.000705586	99.9425	0.0575008	0.000575339	99.9165	0.0834875	0.000835573
	G	56	0	0	0	95.9079	4.09212	0.0426672	98.7456	1.25438	0.0127031	98.6481	1.35189	0.0137042	97.1228	2.87717	0.029624	97.8849	2.11514	0.0216085	98.7564	1.24364	0.012593		95.8033	4.19666	0.0438049	96.5326	3.46744	0.03592	96.9977	3.00232	0.0309525	96.1067	3.89332	0.0405104	96.0839	3.91611	0.0407572	97.73	2.26996	0.0232268
ES52d	C	57	2	0	-2	13.1523	0.559105	0.0425101	5.03258	0.195879	0.0389222	5.20124	0.150895	0.0290112	9.23899	0.447263	0.0484104	8.1084	0.249355	0.0307526	5.37416	0.175435	0.0326442		18.0067	0.414233	0.0230044	13.5362	0.37176	0.0274641	12.8096	0.389912	0.030439	17.0325	0.524218	0.0307775	15.4405	0.378295	0.0245002	10.4044	0.361027	0.0346996
	G	58	0	0	0	99.9068	0.0931842	0.000932712	99.9962	0.0037669	3.76705e-05	99.9938	0.00615896	6.15934e-05	99.9399	0.0600801	0.000601162	99.9738	0.0262479	0.000262548	99.9942	0.00584784	5.84818e-05		99.8732	0.12676	0.00126921	99.9687	0.0312695	0.000312793	99.9569	0.0430955	0.000431141	99.8529	0.147149	0.00147366	99.9607	0.0393427	0.000393582	99.9662	0.0338463	0.000338578
	A	59	0	0	0	99.3983	0.601704	0.00605346	99.887	0.113007	0.00113135	99.8707	0.129338	0.00129506	99.5928	0.40721	0.00408875	99.801	0.199046	0.00199443	99.8947	0.105261	0.00105372		99.4681	0.531939	0.00534784	99.6699	0.330067	0.0033116	99.6286	0.371442	0.00372827	99.3807	0.619252	0.00623111	99.6399	0.360137	0.00361438	99.7179	0.282052	0.0028285
ES51i	G	60	0	2	2	12.0101	1.30458	0.108623	4.52405	0.561269	0.124063	4.69005	0.53583	0.114248	8.50467	0.834446	0.0981162	7.19629	0.971171	0.134954	4.79913	0.617922	0.128757		16.8885	1.26307	0.0747889	12.8205	0.854701	0.0666667	11.9498	1.01377	0.084836	15.8921	1.30595	0.0821759	14.4388	1.19844	0.0830015	9.72742	0.857439	0.0881466
	C	61	0	0	0	99.4249	0.57508	0.00578406	99.887	0.113007	0.00113135	99.8491	0.150895	0.00151123	99.5906	0.409435	0.00411118	99.7747	0.225294	0.00225803	99.8636	0.13645	0.00136636		99.5065	0.493458	0.00495905	99.6178	0.382183	0.0038365	99.6347	0.365286	0.00366625	99.4237	0.576334	0.00579674	99.6883	0.311715	0.0031269	99.7089	0.291078	0.00291928
	C	62	0	0	0	99.9681	0.0319489	0.000319591	99.9962	0.0037669	3.76705e-05	99.9908	0.00923844	9.2393e-05	99.9889	0.0111259	0.000111272	99.9891	0.0109366	0.000109378	99.9864	0.013645	0.000136468		99.9728	0.0271628	0.000271702	99.9826	0.017372	0.00017375	99.9897	0.0102608	0.000102619	99.9816	0.0183936	0.00018397	99.9909	0.00907908	9.0799e-05	99.9887	0.0112821	0.000112834
	C	63	0	0	0	99.6672	0.332801	0.00333912	99.9397	0.0602705	0.000603068	99.8922	0.107782	0.00107898	99.7308	0.269248	0.00269975	99.8425	0.157487	0.00157736	99.9201	0.0799205	0.000799844		99.7555	0.244466	0.00245065	99.7637	0.236259	0.00236818	99.7373	0.262677	0.00263369	99.6505	0.349479	0.00350704	99.7367	0.263293	0.00263988	99.8308	0.169231	0.00169518
	A	64	0	0	0	99.4116	0.588392	0.00591874	99.8757	0.124308	0.00124463	99.8522	0.147815	0.00148034	99.5572	0.442813	0.00444782	99.766	0.234043	0.00234593	99.883	0.116957	0.00117094		99.4703	0.529675	0.00532496	99.6526	0.347439	0.00348651	99.6162	0.383755	0.00385233	99.4145	0.58553	0.00588979	99.6187	0.381321	0.00382781	99.7631	0.236924	0.00237487
	G	65	0	0	0	98.3706	1.62939	0.0165638	99.4463	0.553735	0.00556818	99.495	0.505035	0.00507599	99.1144	0.885625	0.00893539	99.0026	0.997419	0.0100747	99.3899	0.610125	0.0061387		98.6962	1.30382	0.0132104	99.2252	0.77479	0.0078084	99.1976	0.802397	0.00808887	98.737	1.26303	0.0127919	99.1496	0.850407	0.00857701	99.2306	0.769439	0.00775405
ES50i	C	66	0	2	2	10.1251	0.57508	0.0567973	3.05496	0.0828719	0.027127	3.2273	0.0554307	0.0171756	7.12283	0.329328	0.0462356	4.92804	0.170611	0.0346205	3.14809	0.0701741	0.022291		14.1292	0.597583	0.0422941	9.49204	0.253631	0.0267204	8.05886	0.240103	0.0297937	13.4304	0.619252	0.0461082	10.5166	0.230003	0.0218705	6.15326	0.250463	0.0407041
	C	67	0	0	0	96.64	3.35996	0.0347678	98.2672	1.73278	0.0176333	98.2663	1.73375	0.0176434	97.6012	2.39875	0.0245771	97.2352	2.76478	0.0284339	98.0917	1.90834	0.0194547		95.9482	4.05179	0.0422289	95.9072	4.09284	0.042675	95.3416	4.65842	0.0488603	96.1925	3.80748	0.0395819	95.0943	4.90573	0.0515881	95.952	4.04802	0.0421879
	G	68	0	0	0	96.8397	3.16028	0.0326341	98.2409	1.75914	0.0179064	98.2755	1.72451	0.0175477	97.6547	2.34535	0.0240168	97.1849	2.81508	0.0289663	98.0741	1.92589	0.0196371		95.989	4.01105	0.0417865	95.8585	4.14148	0.0432041	95.2657	4.73435	0.0496963	96.1649	3.83507	0.0398801	94.9823	5.0177	0.0528278	95.8708	4.12925	0.043071
	G	69	0	0	0	91.5202	8.47977	0.0926545	95.5099	4.49015	0.0470124	96.4709	3.52909	0.0365819	94.506	5.49399	0.0581338	92.9284	7.07161	0.0760974	95.236	4.76404	0.0500235		92.3921	7.60786	0.0823431	93.2632	6.73685	0.0722348	93.665	6.33504	0.0676351	92.851	7.14899	0.0769942	92.885	7.11497	0.0765998	93.6617	6.33828	0.0676721
ES49i	A	70	0	1	1	15.3168	1.3099	0.0855206	5.35654	0.139375	0.0260197	5.33982	0.0923844	0.017301	10.652	0.796618	0.0747859	8.489	0.207796	0.0244782	5.52036	0.103312	0.0187147		19.9285	0.950699	0.0477056	15.1101	0.396081	0.0262129	14.2708	0.285251	0.0199885	19.1937	0.977928	0.0509503	16.9779	0.308689	0.0181818	11.7311	0.24595	0.0209656
	A	71	0	0	0	91.7891	8.21086	0.0894535	95.4684	4.53159	0.0474669	96.2615	3.73849	0.0388368	94.6996	5.3004	0.0559707	92.8168	7.18317	0.0773908	95.1229	4.8771	0.0512715		92.7022	7.29775	0.0787225	93.7079	6.29213	0.0671462	94.0385	5.96154	0.0633947	93.2158	6.78418	0.0727793	93.342	6.65799	0.071329	93.8919	6.10813	0.0650549
	C	72	0	0	0	98.6555	1.34452	0.0136284	99.6949	0.305119	0.00306053	99.7444	0.255597	0.00256252	99.2034	0.796618	0.00803015	99.4554	0.544643	0.00547626	99.7446	0.255356	0.00256009		98.746	1.25402	0.0126994	99.1766	0.823431	0.00830268	99.1832	0.816762	0.00823488	98.7247	1.27529	0.0129176	99.1678	0.832249	0.00839233	99.2983	0.701746	0.00706706
	C	73	0	0	0	99.4835	0.516507	0.00519189	99.9586	0.0414359	0.000414531	99.9353	0.0646691	0.00064711	99.6751	0.324878	0.00325937	99.895	0.104991	0.00105102	99.9376	0.062377	0.000624159		99.5518	0.448187	0.00450205	99.795	0.204989	0.0020541	99.7845	0.215477	0.00215943	99.5861	0.413857	0.00415576	99.767	0.23303	0.00233574	99.8105	0.189539	0.00189899
	G	74	0	0	0	99.5341	0.465921	0.00468102	99.7212	0.278751	0.0027953	99.7629	0.23712	0.00237684	99.6862	0.313752	0.00314739	99.51	0.48996	0.00492373	99.768	0.231964	0.00232504		99.4318	0.568156	0.00571403	99.3294	0.670558	0.00675085	99.3679	0.632067	0.00636088	99.4543	0.545677	0.00548671	99.3493	0.650667	0.00654929	99.4765	0.523489	0.00526244
	A	75	0	0	0	97.0607	2.9393	0.0302831	99.3559	0.644141	0.00648317	99.4272	0.572784	0.00576083	98.2109	1.78905	0.0182164	98.8954	1.1046	0.0111694	99.3957	0.604277	0.0060795		97.1819	2.81814	0.0289987	98.2906	1.7094	0.0173913	98.4773	1.52271	0.0154625	97.3544	2.64562	0.0271751	98.2356	1.76437	0.0179606	98.5604	1.4396	0.0146062
	C	76	0	0	0	97.4654	2.53461	0.0260052	99.676	0.323954	0.00325007	99.7321	0.267915	0.00268635	98.4646	1.53538	0.0155932	99.5057	0.494335	0.00496791	99.7076	0.292392	0.00293249		97.8021	2.19793	0.0224732	99.0411	0.958933	0.00968217	99.1668	0.833179	0.0084018	97.9001	2.09994	0.0214498	98.9166	1.08344	0.010953	99.2125	0.78749	0.00793741
	G	77	0	0	0	99.5927	0.407348	0.00409014	99.9623	0.037669	0.000376832	99.9723	0.0277153	0.00027723	99.773	0.226969	0.00227486	99.9431	0.0568704	0.000569027	99.9786	0.0214421	0.000214467		99.6695	0.330481	0.00331577	99.8819	0.118129	0.00118269	99.9118	0.0882431	0.000883211	99.7026	0.297364	0.0029825	99.8941	0.105923	0.00106035	99.9075	0.0925132	0.000925989
ES48i	G	78	0	1	1	14.7897	2.03674	0.137714	5.10039	0.31642	0.0620384	5.09346	0.264835	0.0519952	10.2581	1.31509	0.1282	8.17184	0.52277	0.0639722	5.19093	0.231964	0.0446864		19.3037	1.73616	0.089939	14.2172	1.09791	0.0772239	13.2159	0.759301	0.0574534	18.1668	1.67075	0.0919676	16.1305	0.929092	0.0575985	10.6458	0.670157	0.0629504
ES47i	A	79	0	1	1	13.2801	4.96539	0.373897	5.00998	1.09994	0.219549	4.87482	0.806824	0.165509	9.36137	3.14642	0.336106	7.90061	1.93141	0.244463	5.0116	0.83819	0.16725		18.2625	4.13781	0.226574	13.7517	2.63706	0.191764	12.7522	1.79154	0.140489	17.2869	4.08952	0.236567	15.6433	2.80846	0.179532	10.2757	1.89088	0.184014
ES46i	G	80	0	2	2	12.1965	7.2311	0.592884	4.65589	5.64659	1.21278	4.65618	4.63462	0.99537	8.63596	4.83756	0.560165	7.30128	8.65523	1.18544	4.79913	5.86343	1.22177		17.0153	6.17728	0.363044	13.0915	7.64714	0.58413	12.2822	7.17437	0.584127	16.0944	6.06376	0.376762	14.923	8.42236	0.564389	9.8425	7.7869	0.791151
ES45i	A	81	0	1	1	14.5714	1.39244	0.09556	5.12299	0.10924	0.0213235	5.13658	0.0708281	0.013789	10.2781	0.747664	0.072743	8.2812	0.196859	0.0237718	5.22212	0.0857683	0.016424		19.1543	1.0254	0.0535334	14.4118	0.347439	0.024108	13.376	0.281147	0.0210187	18.0625	1.0607	0.0587237	16.2062	0.335926	0.0207283	10.9233	0.194052	0.0177649
ES44i	G	82	0	1	1	29.566	3.80192	0.128591	15.482	0.361623	0.0233577	14.2642	0.338743	0.0237478	20.1802	2.34312	0.11611	24.3449	0.6212	0.0255166	17.0465	0.452233	0.0265294		31.862	2.84757	0.089372	28.3545	0.993677	0.0350447	26.8793	0.870118	0.0323714	30.7174	2.82649	0.092016	31.1624	1.07738	0.0345732	25.9759	0.778465	0.0299687
	C	83	0	0	0	96.262	3.73802	0.0388317	99.5781	0.421893	0.00423681	99.6243	0.375697	0.00377114	97.5323	2.46773	0.0253017	99.3001	0.699943	0.00704877	99.5088	0.491218	0.00493643		97.3086	2.69138	0.0276582	99.0272	0.97283	0.00982387	99.1525	0.847545	0.00854789	97.29	2.70999	0.0278548	99.0104	0.98962	0.00999511	99.1155	0.884516	0.0089241
ES43d	C	84	2	0	-2	37.09	2.72364	0.0734334	18.6424	0.467096	0.0250556	18.3753	0.597419	0.0325122	25.4339	1.85358	0.0728784	28.4046	0.822433	0.0289543	22.4401	0.769965	0.034312		37.779	1.82217	0.0482325	31.8532	0.813008	0.0255236	31.3633	0.886536	0.0282667	36.5941	2.09074	0.0571333	35.0089	0.853433	0.0243776	30.5587	0.821337	0.0268774
ES42d	G	85	4	0	-4	41.4723	2.68104	0.0646466	22.9141	0.704411	0.0307414	23.7428	0.677486	0.0285344	28.9341	1.8202	0.0629086	33.512	0.931799	0.027805	29.0579	0.787509	0.0271014		40.9593	1.86971	0.045648	35.0601	0.903342	0.0257655	35.9191	0.866014	0.0241102	39.9326	1.95586	0.048979	38.2744	0.947251	0.024749	34.5796	0.979286	0.0283197
ES41i	A	86	0	1	1	27.1725	5.3967	0.198609	14.0656	0.704411	0.0500803	12.8846	0.458843	0.0356119	18.5158	3.65376	0.197332	22.1423	0.949298	0.0428727	15.296	0.604277	0.0395055		29.6233	3.6285	0.122488	26.0197	1.289	0.0495393	24.7122	0.995301	0.0402757	28.504	3.6634	0.128522	28.8594	1.37094	0.0475042	23.5345	1.0718	0.0455417
ES40i	A	87	0	4	4	25.5378	9.28914	0.363741	13.3574	3.31488	0.248167	12.2471	3.02405	0.24692	17.1985	6.4664	0.375987	21.0705	4.96522	0.235648	14.4831	3.81084	0.263122		28.0773	7.27285	0.259029	24.7307	4.75992	0.19247	23.6368	4.70767	0.199167	27.1245	7.15819	0.263901	27.5822	5.11152	0.185319	22.5507	5.05664	0.224235
ES39i	A	88	1	3	2	27.4175	11.2859	0.411633	14.8906	8.01974	0.538578	13.9408	9.98984	0.716589	18.6894	8.14197	0.435647	23.54	9.90201	0.420647	16.7677	12.5553	0.748779		29.5735	8.42727	0.28496	26.183	7.95984	0.304007	25.6685	9.71701	0.378558	28.5622	8.59289	0.300848	29.3708	7.9684	0.271303	25.0102	9.06178	0.362324
ES38i	A	89	0	1	1	30.852	11.4297	0.370469	15.7419	2.6519	0.168461	14.5167	1.65984	0.11434	21.1949	7.9061	0.373018	24.7014	3.54565	0.14354	17.5123	2.19294	0.125223		32.2468	9.03391	0.280149	27.4025	5.20117	0.189806	26.7643	3.7452	0.139933	31.2876	8.96076	0.2864	30.8416	5.02981	0.163085	26.0075	3.81786	0.146799
ES37i	A	90	0	1	1	29.5927	9.13738	0.308772	16.1336	2.16597	0.134252	14.5629	1.64136	0.112709	20.2381	6.32176	0.312369	24.8305	3.2088	0.129228	17.5747	2.08573	0.118678		31.235	6.89936	0.220886	27.5311	4.18664	0.15207	26.7438	3.21164	0.120089	30.0981	6.76579	0.224791	30.5783	4.49112	0.146873	26.021	3.20637	0.123222
	A	91	0	0	0	83.967	16.033	0.190944	95.8187	4.18126	0.0436372	97.3055	2.69455	0.0276916	88.4579	11.5421	0.130481	94.1117	5.88827	0.0625668	96.3198	3.68024	0.0382086		86.6449	13.3551	0.154136	92.6273	7.37266	0.0795949	94.5187	5.48134	0.0579921	86.6033	13.3967	0.15469	92.1405	7.85946	0.0852986	94.298	5.70197	0.0604676
ES36i	G	92	0	4	4	23.8072	18.099	0.760233	13.5232	4.16996	0.308357	12.9215	3.0918	0.239276	16.1727	13.0797	0.808751	21.5954	5.95608	0.275803	15.5514	4.03306	0.259338		26.3095	14.3624	0.5459	24.3694	7.5846	0.311235	24.4331	5.62499	0.23022	25.1042	14.4482	0.575528	27.3371	8.04406	0.294254	23.4848	6.14649	0.261722
ES35i	G	93	0	3	3	24.2545	11.8717	0.489462	13.316	2.77621	0.208487	12.4627	2.32193	0.186311	16.5176	8.16199	0.49414	21.2411	3.87156	0.182268	14.9666	2.70365	0.180646		26.8143	8.51102	0.317407	24.3416	4.20749	0.172852	24.3551	3.28141	0.134732	25.699	8.50092	0.330789	27.3795	4.38822	0.160274	23.381	3.56063	0.152287
	G	94	0	0	0	86.1688	13.8312	0.160513	95.4646	4.53535	0.0475082	96.8097	3.19034	0.0329548	90.2982	9.70182	0.107442	93.4358	6.56415	0.0702531	95.9669	4.03306	0.0420255		89.4835	10.5165	0.117525	93.8191	6.18095	0.0658816	95.7192	4.28082	0.0447227	89.9663	10.0337	0.111528	93.69	6.30996	0.0673493	95.4127	4.5873	0.0480785
	A	95	0	0	0	83.8818	16.1182	0.192154	95.2424	4.7576	0.0499525	96.6618	3.33816	0.0345344	88.6493	11.3507	0.12804	93.2171	6.78289	0.0727644	95.5732	4.42681	0.0463186		88.1932	11.8068	0.133874	93.4681	6.53186	0.0698833	95.3908	4.60916	0.0483187	88.5561	11.4439	0.129228	93.1241	6.87589	0.0738358	95.2435	4.75653	0.0499408
ES34i	G	96	0	1	1	27.6757	8.05911	0.291198	16.3672	3.01729	0.18435	16.5584	2.48514	0.150084	18.676	5.60525	0.300131	25.2942	4.30684	0.17027	19.6098	3.07401	0.156759		29.3427	6.36063	0.216771	27.2914	4.07894	0.149459	27.6098	2.97975	0.107923	28.3017	6.05763	0.214038	30.1425	4.17032	0.138353	26.6619	3.22442	0.120938
ES33i	G	97	0	2	2	33.8951	17.4255	0.514099	24.3304	5.69556	0.234092	24.2448	4.71777	0.194589	24.7508	12.0694	0.487638	34.7806	7.98373	0.229545	29.9078	6.07201	0.203024		33.4216	13.724	0.410633	34.2853	7.66104	0.22345	34.6283	6.23858	0.180159	32.0907	13.8044	0.430168	36.1922	8.14999	0.225186	33.0453	6.60003	0.199727
	C	98	0	0	0	79.6778	20.3222	0.255054	88.8123	11.1877	0.12597	90.5768	9.42321	0.104036	84.2434	15.7566	0.187036	86.1214	13.8786	0.161151	87.1952	12.8048	0.146852		86.3575	13.6425	0.157978	89.278	10.722	0.120097	90.4492	9.55078	0.105593	86.683	13.317	0.153629	90.1431	9.85685	0.109347	90.9179	9.08209	0.0998933
	G	99	0	0	0	85.8706	14.1294	0.164543	92.8768	7.12322	0.0766953	94.0012	5.99883	0.0638165	88.6538	11.3462	0.127984	91.7888	8.21121	0.0894576	91.7779	8.22206	0.0895865		89.9701	10.0299	0.11148	93.0825	6.91752	0.074316	93.2053	6.79472	0.0729006	90.2023	9.79767	0.108619	93.7808	6.21917	0.066316	94.0679	5.93213	0.0630622
ES32i	G	100	0	2	2	33.0857	21.8051	0.659049	20.1266	12.9619	0.64402	21.1222	11.2124	0.530835	22.9484	16.8046	0.73228	30.0232	16.5055	0.54976	25.2939	15.1693	0.599723		34.447	15.3153	0.444605	31.3495	13.2235	0.421811	31.942	11.6563	0.364921	33.4733	14.9264	0.44592	34.0889	12.5564	0.368342	31.2334	11.4243	0.365771
ES31i	G	101	0	8	8	29.566	25.9318	0.877082	17.4483	15.8662	0.909326	18.3291	13.9839	0.762937	20.3694	19.8865	0.976295	26.366	20.4187	0.774432	21.8417	18.6858	0.855511		31.8394	18.19	0.571307	28.6881	16.0899	0.560857	29.6415	14.201	0.479092	30.6499	18.2036	0.593919	31.5377	15.3164	0.485654	28.8551	14.0507	0.486941
ES30i	G	102	0	2	2	47.6651	6.46699	0.135676	27.1518	5.94041	0.218785	25.9723	5.34598	0.205834	34.9399	4.46818	0.127882	38.0528	8.24402	0.216647	31.9409	7.16165	0.224216		45.0088	4.44792	0.0988232	38.3782	6.1879	0.161235	38.4781	4.93341	0.128213	43.6082	4.54936	0.104323	40.7953	5.94377	0.145697	36.924	5.43797	0.147275
ES29i	A	103	0	4	4	34.3823	8.29073	0.241134	19.1246	7.39443	0.386646	18.8433	6.55622	0.347933	23.3378	6.48643	0.277937	28.8464	9.94794	0.344859	22.1653	8.9199	0.402427		35.4566	5.22432	0.147344	31.2626	7.24759	0.231829	31.2627	5.87125	0.187804	34.393	5.33415	0.155094	34.0526	6.83655	0.200764	30.5993	6.45336	0.210899
ES28i	G	104	0	2	2	34.5181	17.476	0.506286	19.5804	8.01974	0.409581	18.557	5.98343	0.322436	23.7984	13.9942	0.588032	29.3604	9.248	0.314982	22.0327	8.17333	0.370963		35.323	12.9386	0.366293	31.346	8.71031	0.277876	31.2668	7.68331	0.245734	34.2367	12.7315	0.371866	34.3462	7.7838	0.226628	30.6038	6.85726	0.224065
	G	105	0	0	0	81.065	18.935	0.233579	91.8032	8.19678	0.0892864	94.2629	5.73707	0.0608625	84.3547	15.6453	0.18547	90.6492	9.3508	0.103154	92.2068	7.79322	0.084519		86.0881	13.9119	0.161601	90.9388	9.06122	0.0996409	92.3064	7.69357	0.0833482	86.309	13.691	0.158628	91.8076	8.19236	0.0892339	93.1788	6.82116	0.073205
ES27i	A	106	0	3	3	38.0458	6.59478	0.173338	23.4753	2.71594	0.115693	20.8635	2.33425	0.111882	26.8046	5.11348	0.190769	34.6297	3.51721	0.101566	24.941	3.02528	0.121297		37.5662	4.90742	0.130634	36.1059	3.48134	0.0964203	34.3307	2.71912	0.0792038	36.5788	4.94175	0.135099	38.8464	3.02939	0.0779838	33.7989	2.73252	0.0808465
	G	107	0	0	0	78.6182	21.3818	0.27197	87.1172	12.8828	0.147879	88.3041	11.6959	0.13245	80.988	19.012	0.234751	87.0139	12.9861	0.149242	85.2167	14.7833	0.173479		84.078	15.922	0.189371	89.1251	10.8749	0.122018	89.9321	10.0679	0.11195	84.2244	15.7756	0.187304	90.1371	9.86291	0.109421	90.4757	9.52435	0.10527
ES26i	A	108	0	2	2	40.4925	7.02077	0.173384	30.2369	8.56594	0.283294	29.9079	9.63878	0.322282	29.1455	7.79261	0.267369	41.5504	8.04278	0.193567	35.3833	11.4754	0.324317		39.3431	5.50274	0.139865	39.8826	5.32277	0.133461	38.9973	5.88766	0.150976	38.2649	5.61312	0.146691	42.2389	4.91481	0.116357	38.6434	5.97049	0.154502
ES25i	G	109	0	1	1	55.5165	7.00479	0.126175	38.0005	5.54865	0.146015	36.3009	6.38992	0.176026	42.3899	6.60214	0.155748	49.4904	5.35456	0.108194	44.0479	7.31955	0.166173		50.5885	5.14509	0.101705	47.1475	3.85658	0.0817981	45.6997	4.04892	0.0885985	49.0895	5.61619	0.114407	48.9635	3.42887	0.0700291	44.5711	4.08863	0.0917329
ES24d	C	110	3	1	-2	58.3839	10.0506	0.172146	39.4621	9.35322	0.237018	37.2802	9.42629	0.25285	44.6173	9.05429	0.202933	50.8727	9.54985	0.18772	45.2428	11.4033	0.252047		53.0807	7.66218	0.14435	48.9577	8.5748	0.175147	47.4584	9.50563	0.200294	51.6186	7.94605	0.153938	50.4585	7.78682	0.154321	46.2837	9.60332	0.207488
	A	111	0	0	0	98.9963	1.00373	0.010139	99.725	0.274984	0.00275742	99.7598	0.2402	0.00240778	99.2857	0.714286	0.00719424	99.5691	0.430902	0.00432767	99.6823	0.317733	0.00318745		99.2734	0.726606	0.00731924	99.5518	0.448197	0.00450215	99.6388	0.361181	0.0036249	99.3194	0.680564	0.00685227	99.6732	0.326847	0.00327919	99.6864	0.313642	0.00314629
ES23i	A	112	0	2	2	54.803	8.24281	0.150408	33.1638	4.93464	0.148796	30.2682	4.533	0.149761	40.3182	7.15843	0.177548	45.2885	5.18833	0.114562	37.3618	5.35662	0.143371		49.7872	6.27914	0.12612	44.4583	4.53756	0.102063	42.2377	4.16384	0.0985813	48.7922	5.91968	0.121324	46.7209	4.0523	0.086734	41.051	4.16761	0.101523
Es22i	A	113	0	3	3	52.886	10.5485	0.199456	38.0382	6.10992	0.160626	36.4826	6.49771	0.178104	41.3462	8.77392	0.212206	49.1273	6.84194	0.13927	44.3325	7.77958	0.175483		47.7704	8.58119	0.179634	45.0038	7.18157	0.159577	44.021	7.02046	0.15948	46.5849	8.52544	0.183009	46.9055	6.42799	0.137041	42.7479	7.22506	0.169016
Es21i	A	114	0	2	2	57.5399	10.804	0.187766	41.2627	5.76713	0.139766	38.5951	6.40224	0.165882	45.1936	8.91633	0.197292	51.9183	6.59696	0.127064	46.7515	7.62168	0.163025		51.374	9.40513	0.183072	48.3983	6.63957	0.137186	47.1649	6.09699	0.129269	50.2575	9.27652	0.18458	49.938	6.14654	0.123083	45.6586	6.61131	0.144799
ES20i	A	115	0	1	1	56.2993	13.3014	0.236262	36.6294	6.72016	0.183464	34.4779	7.01198	0.203376	44.328	10.2359	0.230912	47.2396	7.3669	0.155948	41.8666	8.51056	0.203278		50.9281	10.6592	0.209298	45.3825	7.84171	0.172791	43.6229	7.63406	0.175001	49.6475	10.7235	0.215993	47.1386	7.26024	0.154019	42.4229	8.05316	0.18983
	G	116	0	0	0	80.4526	19.5474	0.242968	89.5318	10.4682	0.116922	90.7184	9.28156	0.102312	83.4513	16.5487	0.198304	88.6019	11.3981	0.128644	88.3823	11.6177	0.131448		84.1211	15.8789	0.188763	87.1447	12.8553	0.147516	87.492	12.508	0.142961	84.298	15.702	0.186268	88.4393	11.5607	0.130719	87.3437	12.6563	0.144902
	A	117	0	0	0	83.5224	16.4776	0.197284	92.858	7.14205	0.0769137	94.8172	5.18277	0.0546606	87.5745	12.4255	0.141884	92.0994	7.90061	0.0857835	93.1873	6.81273	0.073108		87.0343	12.9657	0.148973	89.8339	10.1661	0.113165	90.7201	9.27989	0.102291	87.1766	12.8234	0.147097	90.6939	9.30606	0.102609	90.6223	9.37768	0.103481
ES19d	G	118	3	0	-3	59.2146	13.4425	0.227013	47.0825	5.8048	0.12329	45.9674	4.55763	0.0991492	48.4468	11.2617	0.232455	57.1985	6.72164	0.117514	55.1256	5.56519	0.100955		53.2052	10.6139	0.199489	52.4182	8.28295	0.158017	53.7996	7.2934	0.135566	52.1827	10.9258	0.209376	53.6634	7.3934	0.137774	51.7487	7.08516	0.136915
	G	119	0	0	0	81.7386	18.2614	0.223413	93.7017	6.29826	0.0672161	95.4116	4.58843	0.0480909	86.0214	13.9786	0.162502	92.3969	7.60313	0.0822878	94.1249	5.87513	0.0624185		85.6286	14.3714	0.167834	90.0215	9.97846	0.110845	91.6969	8.30306	0.090549	85.5395	14.4605	0.16905	91.1086	8.89144	0.0975918	91.5113	8.48865	0.0927606
	G	120	0	0	0	82.4681	17.5319	0.212591	92.5453	7.4547	0.0805519	93.8595	6.14049	0.0654221	87.3387	12.6613	0.144968	91.5744	8.42557	0.0920078	92.0333	7.96671	0.0865633		86.2601	13.7399	0.159284	88.875	11.125	0.125176	89.0804	10.9196	0.122581	85.9013	14.0987	0.164127	89.9676	10.0324	0.111511	89.4309	10.5691	0.118181
	G	121	1	1	0	79.0761	20.9239	0.264604	87.4449	12.5551	0.143577	89.2649	10.7351	0.120261	82.1273	17.8727	0.217622	87.6373	12.3627	0.141067	87.2322	12.7678	0.146365		83.5484	16.4516	0.196911	84.8065	15.1935	0.179155	83.7304	16.2696	0.194309	83.1453	16.8547	0.202714	86.221	13.779	0.15981	84.8707	15.1293	0.178263
	G	122	0	0	0	79.7977	20.2023	0.25317	89.1249	10.8751	0.12202	90.934	9.06599	0.0996986	84.7441	15.2559	0.180023	88.2563	11.7437	0.133064	88.392	11.608	0.131324		84.2478	15.7522	0.186974	85.7758	14.2242	0.16583	85.563	14.437	0.168729	83.97	16.03	0.190902	87.3105	12.6895	0.145338	86.5495	13.4505	0.155408
ES18i	G	123	0	1	1	67.9899	4.0229	0.059169	49.7985	2.24884	0.0451589	48.3078	1.77994	0.0368458	53.607	3.62483	0.0676186	61.2363	2.41918	0.0395056	58.3419	2.575	0.0441363		59.9325	3.70094	0.0617517	57.9008	3.08179	0.0532253	58.6222	2.89766	0.0494294	58.6082	3.55917	0.0607281	58.5207	2.67833	0.0457672	56.4331	2.8476	0.0504598
	G	124	0	0	0	81.6001	18.3999	0.225489	89.6448	10.3552	0.115514	91.9533	8.04668	0.0875084	84.2012	15.7988	0.187632	89.5009	10.4991	0.117308	90.238	9.76199	0.108181		85.1283	14.8717	0.174697	87.1378	12.8622	0.147608	88.2534	11.7466	0.133101	84.8743	15.1257	0.178213	88.8267	11.1733	0.125788	88.587	11.413	0.128833
ES17i	G	125	0	4	4	52.6038	16.8983	0.321237	43.6433	12.6719	0.29035	43.0265	11.4588	0.266318	42.8616	16.3485	0.381425	53.1235	12.3102	0.231729	51.0127	13.2765	0.26026		48.8094	13.2192	0.270834	48.8152	12.619	0.258505	50.1118	12.8014	0.255457	47.3973	13.7983	0.29112	50.513	11.4911	0.227488	48.5063	11.5416	0.23794
ES16i	G	126	0	2	2	74.4595	2.28967	0.0307505	55.6522	2.60293	0.0467714	53.9464	2.42047	0.0448681	60.2581	2.71028	0.0449778	65.74	2.18295	0.0332058	64.2483	2.41711	0.0376214		64.6295	2.28394	0.035339	61.7296	2.64054	0.0427759	63.73	2.53443	0.0397682	63.6757	2.27161	0.0356747	62.0737	2.47556	0.039881	60.9053	2.45273	0.0402712
	A	127	0	0	0	77.5905	22.4095	0.288817	86.4391	13.5609	0.156883	89.462	10.538	0.117793	80.7766	19.2234	0.237982	86.1455	13.8545	0.160827	86.8736	13.1264	0.151098		81.7964	18.2036	0.222548	82.3362	17.6638	0.214533	82.2323	17.7677	0.216066	81.7106	18.2894	0.223831	84.2175	15.7825	0.187401	83.5033	16.4967	0.197557
ES15i	A	128	0	3	3	65.394	12.7982	0.195709	49.4293	9.76005	0.197455	49.8938	7.37844	0.147883	51.5354	12.9973	0.252202	59.8845	9.03583	0.150888	58.9969	8.23376	0.139563		57.8976	10.3264	0.178356	54.9823	10.5587	0.192038	56.5659	10.4948	0.185532	56.7811	10.748	0.189288	56.1571	9.46645	0.168571	55.1469	9.11142	0.165221
	C	129	0	0	0	93.2801	6.71991	0.0720402	88.7596	11.2404	0.126639	88.5351	11.4649	0.129496	90.287	9.71295	0.107579	91.0167	8.98333	0.0986999	91.2731	8.72693	0.0956134		91.6565	8.34352	0.0910303	89.6498	10.3502	0.115452	89.6714	10.3286	0.115182	91.4991	8.50092	0.0929072	89.7951	10.2049	0.113646	88.8465	11.1535	0.125537
	C	130	0	0	0	97.492	2.50799	0.0257251	97.8679	2.13207	0.0217852	98.3094	1.69064	0.0171971	97.4989	2.50111	0.0256527	97.6771	2.32294	0.0237818	97.7564	2.24362	0.0229511		97.7138	2.28621	0.023397	97.2413	2.75867	0.0283693	97.3507	2.64935	0.0272145	97.756	2.24402	0.0229553	97.5335	2.46648	0.0252886	97.5879	2.41211	0.0247173
	C	131	0	0	0	99.1747	0.825346	0.00832215	99.563	0.436961	0.00438879	99.6489	0.351061	0.00352298	99.3502	0.649755	0.00654005	99.5319	0.468087	0.00470288	99.5361	0.463929	0.00466091		99.004	0.995971	0.0100599	98.8187	1.18129	0.0119542	98.5614	1.43857	0.0145957	98.9454	1.05457	0.0106581	98.8863	1.1137	0.0112624	98.6349	1.36513	0.0138403
ES14d	G	132	3	0	-3	73.5676	7.90735	0.107484	74.9878	7.37936	0.0984076	77.0271	6.27598	0.0814776	67.7704	9.33467	0.13774	79.2401	6.34761	0.080106	80.3201	5.61587	0.0699187		69.0593	8.76681	0.126946	75.0295	7.10861	0.0947442	76.5212	7.2462	0.0946953	68.5408	8.98835	0.131139	75.5833	7.003	0.0926527	76.0865	6.49849	0.0854093
ES13d	G	133	4	0	-4	68.1763	8.55964	0.125552	65.6157	15.158	0.231012	67.3791	15.4744	0.229662	62.9105	10.9657	0.174307	71.5451	11.7919	0.164817	70.3476	13.8984	0.197567		66.0442	8.81887	0.13353	66.4408	12.5043	0.188203	65.8027	14.0799	0.213972	65.4414	9.13243	0.139551	68.7498	10.8495	0.157811	65.8717	13.6829	0.207721
ES12i	G	134	0	1	1	53.8924	21.1475	0.392402	43.8129	16.8569	0.384748	42.9988	15.2434	0.354508	47.866	18.9074	0.395007	51.3671	15.3463	0.298757	48.9445	15.9704	0.326297		52.6665	16.6961	0.317016	47.1545	16.9516	0.35949	46.8058	18.0488	0.38561	52.3023	16.9988	0.32501	49.5082	14.9411	0.301791	45.415	16.9592	0.373429
ES11d	A	135	2	1	-1	67.721	23.6502	0.349229	65.1034	22.1682	0.340508	64.8508	23.9553	0.369391	62.5567	22.0672	0.352755	70.8911	19.5612	0.275933	68.2638	22.8573	0.334837		65.6707	20.1797	0.307287	65.8398	21.9234	0.332982	64.3292	25.0077	0.388745	65.1533	20.466	0.31412	68.0568	19.6744	0.289088	64.2064	24.2227	0.377262
	A	136	0	0	0	62.4201	37.5799	0.602047	60.4136	39.5864	0.655256	61.9592	38.0408	0.613966	63.2221	36.7779	0.581726	63.6423	36.3577	0.571281	63.4744	36.5256	0.575438		66.5309	33.4691	0.503062	61.2605	38.7395	0.632373	61.5301	38.4699	0.625221	66.6094	33.3906	0.501289	63.4688	36.5312	0.575577	61.5438	38.4562	0.624858
	A	137	0	0	0	77.0527	22.9473	0.297813	82.7815	17.2185	0.208	84.9537	15.0463	0.177112	78.9809	21.0191	0.266129	84.1288	15.8712	0.188654	84.012	15.988	0.190306		80.325	19.675	0.244942	80.3384	19.6616	0.244735	79.4537	20.5463	0.258594	80.1073	19.8927	0.248326	82.55	17.45	0.211387	80.7888	19.2112	0.237795
	G	138	0	0	0	77.2817	22.7183	0.293968	83.7383	16.2617	0.194197	85.8621	14.1379	0.164658	79.2056	20.7944	0.262537	85.0978	14.9022	0.175119	84.9165	15.0835	0.177628		81.8416	18.1584	0.221872	83.3333	16.6667	0.2	82.6756	17.3244	0.209547	81.7167	18.2833	0.223739	85.0679	14.9321	0.175531	83.8192	16.1808	0.193044
ES10i	A	139	0	1	1	76.0517	0.205005	0.00269561	58.0857	0.124308	0.00214008	54.864	0.150895	0.00275034	68.004	0.224744	0.00330487	64.3991	0.120303	0.00186808	61.8643	0.0935654	0.00151243		71.178	0.267101	0.00375258	64.0504	0.222361	0.00347166	64.6391	0.211373	0.00327005	71.0423	0.239117	0.00336584	64.4796	0.142239	0.00220595	62.1486	0.223386	0.00359438
ES9i	A	140	0	2	2	75.229	16.4617	0.218821	56.9933	24.0667	0.422274	53.7462	25.1717	0.468344	66.8825	18.3311	0.274079	63.3339	22.4091	0.353825	60.8721	22.5239	0.37002		70.1209	16.2796	0.232165	62.685	21.2146	0.338433	63.6931	19.592	0.307601	69.9111	16.027	0.229248	63.1722	21.0453	0.333142	61.1219	20.7636	0.339708
ES8i	A	141	0	1	1	53.123	17.9286	0.337493	41.8842	24.0705	0.574692	40.6861	24.5527	0.603467	46.9381	21.4642	0.457286	49.3613	22.4988	0.455798	46.7476	22.2978	0.476983		52.8815	18.7899	0.355321	47.3873	21.5864	0.455532	47.3373	19.3047	0.407812	52.4923	18.4427	0.35134	49.5294	21.5447	0.434987	45.9723	20.662	0.449445
	C	142	0	0	0	60.2157	39.7843	0.660698	50.0509	49.9491	0.997968	47.424	52.576	1.10864	59.3814	40.6186	0.684029	55.6783	44.3217	0.796032	52.3401	47.6599	0.910581		64.5231	35.4769	0.549833	56.0176	43.9824	0.785152	54.6861	45.3139	0.828618	64.4329	35.5671	0.552003	58.5026	41.4974	0.709327	54.136	45.864	0.847199
	A	143	0	0	0	99.9201	0.0798722	0.000799361	99.951	0.0489698	0.000489937	99.9169	0.083146	0.000832152	99.8732	0.126836	0.00126997	99.9563	0.0437464	0.000437656	99.9181	0.0818697	0.000819368		99.8959	0.104124	0.00104233	99.927	0.0729623	0.000730155	99.92	0.0800345	0.000800986	99.908	0.0919681	0.000920528	99.9395	0.0605272	0.000605638	99.9368	0.0631797	0.000632197
ES7d	C	144	1	0	-1	95.6257	0.0878594	0.000918785	93.5021	0.0602705	0.000644589	94.7464	0.0461922	0.000487535	92.3765	0.126836	0.00137303	95.1245	0.0306225	0.00032192	95.5966	0.0409349	0.000428204		93.0576	0.0656435	0.000705407	93.5758	0.0347439	0.000371292	94.3996	0.0779823	0.000826087	92.6395	0.0674433	0.000728019	93.5085	0.0484218	0.000517833	93.77	0.0383591	0.000409077
	G	145	0	0	0	99.7391	0.260916	0.00261598	99.8305	0.169511	0.00169799	99.8399	0.160133	0.0016039	99.6551	0.344904	0.00346098	99.8228	0.177173	0.00177488	99.8889	0.111109	0.00111233		99.6876	0.312373	0.00313351	99.8263	0.17372	0.00174022	99.8112	0.188799	0.00189156	99.6873	0.312692	0.00313672	99.882	0.118028	0.00118167	99.7834	0.216616	0.00217087
ES6d	A	146	3	1	-2	70.229	26.672	0.379786	76.6829	17.9531	0.234121	80.1897	15.7238	0.196083	67.016	27.3364	0.407909	80.0866	15.8581	0.198012	80.5286	15.9042	0.197497		70.5894	24.2474	0.343498	75.7244	18.9042	0.249644	76.3632	18.9887	0.248663	70.1717	24.2213	0.345173	77.2387	17.3199	0.224238	76.7972	18.0717	0.235317
ES5i	G	147	0	2	2	93.0059	0.260916	0.00280537	91.6827	0.63284	0.0069025	93.1605	0.834539	0.00895809	87.6324	0.413885	0.00472297	93.6611	0.450588	0.00481084	94.3705	0.62182	0.00658914		88.372	0.353117	0.0039958	91.2133	0.611493	0.006704	92.6019	0.613598	0.00662619	88.0411	0.3832	0.00435252	91.0359	0.568956	0.00624979	91.9468	0.683695	0.00743577
ES4i	A	148	0	1	1	93.4665	0.0292865	0.000313337	92.76	0.0414359	0.000446701	94.3676	0.0523512	0.000554758	88.4112	0.0912328	0.00103191	94.4092	0.067807	0.000718224	95.3159	0.0428842	0.000449916		89.0126	0.0769614	0.000864612	92.1444	0.0486415	0.000527884	93.4331	0.0923475	0.000988381	88.7431	0.0613121	0.000690894	91.959	0.042369	0.000460738	92.881	0.069949	0.000753104
	A	149	0	0	0	99.9547	0.0452609	0.000452814	99.9548	0.0452028	0.000452233	99.9476	0.0523512	0.000523786	99.9332	0.0667557	0.000668003	99.9234	0.0765563	0.000766149	99.9708	0.0292392	0.000292477		99.9389	0.0611164	0.000611538	99.9375	0.0625391	0.000625782	99.9466	0.0533563	0.000533848	99.9295	0.0705089	0.000705586	99.9455	0.0544745	0.000545042	99.9323	0.0676926	0.000677384
	G	150	0	0	0	99.9521	0.0479233	0.000479463	99.9661	0.0339021	0.000339136	99.9076	0.0923844	0.000924699	99.9444	0.0556297	0.000556607	99.9409	0.0590577	0.000590926	99.9571	0.0428842	0.000429026		99.9366	0.06338	0.000634202	99.934	0.0660135	0.000660571	99.9261	0.073878	0.000739326	99.9326	0.0674433	0.000674888	99.9274	0.0726326	0.000726854	99.9391	0.0609233	0.000609605
ES3i	A	151	0	2	2	97.9073	0.0266241	0.000271931	95.6643	0.0565036	0.000590644	96.7665	0.0708281	0.000731948	96.1571	0.0578549	0.000601671	96.6097	0.061245	0.000633943	97.0079	0.0448334	0.000462163		96.0772	0.0679071	0.000706797	95.32	0.0555903	0.000583197	95.8403	0.0677215	0.000706608	95.7174	0.0705089	0.000736636	95.2274	0.042369	0.000444925	95.3969	0.069949	0.000733242
	G	152	0	0	0
	A	153	0	0	0
ES2d	A	154	4	3	-1
	G	155	0	0	0
	A	156	0	0	0
ES1i	A	157	0	1	1
	A	158	1	1	0
	A	159	0	0	0
	G	160	0	0	0
	A	161	0	0	0
	A	162	1	1	0
	G	163	1	1	0

## Sheet: A6_CorInc ratio_mtRNA vs IPs
Supplementary Table S3. A6 Cor, Inc, and Ratio values: mtRNA vs IPs
Notes: See the suplementary table legend for additional details.
						Ext vs IPs (KH2F1-RNAi samples at day 0)
						X01 - 0 Day mtRNA			J76 - 0 Day H2-IP			J79 - 0 Day RESC6-IP			X02 - 0 Day mtRNA - Bio Rep			J85 - 0 Day H2-IP - Bio Rep			J88 - 0 Day RESC6-IP - Bio Rep
			Ts 5' to T-str position			91183 Reads			38273 Reads			17367 Reads			96251 Reads			25948 Reads			28314 Reads
Canonical Editing Site (ES)	sequence	T-stripped	pre-edited	edited	editing events; del = -; ins = +	Correct %	Incorrect %	Ratio	Correct %	Incorrect %	Ratio	Correct %	Incorrect %	Ratio	Correct %	Incorrect %	Ratio	Correct %	Incorrect %	Ratio	Correct %	Incorrect %	Ratio
	A	1
	C	2
	G	3
	G	4
	C	5
	G	6
	G	7
	G	8
	A	9
	A	10
	A	11
	A	12
	C	13
	A	14	0	0	0
ES68i	C	15	0	1	1
	C	16	0	0	0	99.9474	0.0526414	0.000526691	99.9869	0.013064	0.000130657	99.977	0.0230322	0.000230375	99.9605	0.0394801	0.000394957	99.9961	0.00385386	3.85401e-05	99.9965	0.00353182	3.53195e-05
	C	17	0	0	0	99.9517	0.0482546	0.000482779	100	0	0	99.9942	0.00575805	5.75838e-05	99.9792	0.020779	0.000207833	100	0	0	99.9929	0.00706364	7.06414e-05
	A	18	0	0	0	99.8827	0.117346	0.00117484	99.9869	0.013064	0.000130657	99.9942	0.00575805	5.75838e-05	99.9294	0.0706486	0.000706986	99.9923	0.00770772	7.70832e-05	99.9717	0.0282546	0.000282626
ES67i	A	19	5	6	1	0.114056	5.31459	46.5962	0.0600946	0.731586	12.1739	0.0575805	0.460644	8	0.0903887	3.30802	36.5977	0.0809311	0.501002	6.19048	0.0459137	0.628664	13.6923
ES66i	G	20	0	2	2	0.917934	3.57961	3.89964	0.112351	0.491208	4.37209	0.0978868	0.166983	1.70588	0.542332	2.23582	4.12261	0.0385386	0.277478	7.2	0.105955	0.356714	3.36667
ES65i	G	21	0	2	2	3.29667	1.48054	0.449102	0.402372	0.203799	0.506494	0.213048	0.0863707	0.405405	2.05297	0.892458	0.434717	0.235086	0.107908	0.459016	0.339055	0.141273	0.416667
	A	22	0	0	0	97.4491	2.55091	0.0261769	99.6316	0.368406	0.00369768	99.8157	0.184257	0.00184598	98.4426	1.55739	0.0158202	99.8381	0.161862	0.00162125	99.7316	0.268418	0.00269141
ES64i	G	23	0	1	1	3.60703	1.32261	0.366677	0.449403	0.206412	0.459302	0.201532	0.0978868	0.485714	2.3127	0.687785	0.297394	0.281332	0.0809311	0.287671	0.399096	0.102423	0.256637
ES63i	G	24	0	6	6	2.71103	2.73516	1.0089	0.344891	0.337052	0.977273	0.155467	0.201532	1.2963	1.70076	1.67583	0.985339	0.188839	0.204255	1.08163	0.296673	0.27195	0.916667
	A	25	0	0	0	97.9744	2.0256	0.0206748	99.7492	0.25083	0.0025146	99.8157	0.184257	0.00184598	98.8031	1.19687	0.0121137	99.8536	0.146447	0.00146662	99.8234	0.176591	0.00176903
ES62i	A	26	1	8	7	2.26797	4.89455	2.15812	0.271732	0.634912	2.33654	0.149709	0.345483	2.30769	1.48362	2.87062	1.93487	0.173424	0.373825	2.15556	0.261355	0.462669	1.77027
ES61i	A	27	0	4	4	2.31293	4.39117	1.89853	0.27957	0.566979	2.02804	0.166983	0.259112	1.55172	1.48778	2.7075	1.81983	0.154154	0.33914	2.2	0.282546	0.377905	1.3375
ES60i	G	28	0	5	5	5.62276	2.02121	0.359469	0.739425	0.242991	0.328622	0.333967	0.184257	0.551724	3.42334	1.25401	0.366313	0.408509	0.123324	0.301887	0.529773	0.2331	0.44
ES59i	A	29	0	12	12	3.79347	4.3155	1.13761	0.410211	0.655815	1.59873	0.201532	0.380031	1.88571	2.34179	2.59218	1.10692	0.200401	0.350701	1.75	0.339055	0.476796	1.40625
ES58i	G	30	0	1	1	7.78654	0.936578	0.120282	1.05296	0.0992867	0.0942928	0.50095	0.0806127	0.16092	4.78852	0.601552	0.125624	0.581933	0.1002	0.172185	0.815851	0.098891	0.121212
	G	31	0	0	0	96.4533	3.54671	0.0367713	99.5192	0.480757	0.00483079	99.6257	0.374273	0.00375679	97.7735	2.22647	0.0227717	99.7302	0.26977	0.002705	99.6221	0.377905	0.00379338
ES57i	G	32	0	1	1	8.45772	1.49699	0.176997	1.11044	0.185509	0.167059	0.535498	0.20729	0.387097	5.20202	0.925705	0.177951	0.616618	0.107908	0.175	0.921805	0.173059	0.187739
ES56i	G	33	0	6	6	6.00112	5.16982	0.861477	0.773391	0.645364	0.834459	0.362757	0.535498	1.47619	3.62178	3.42126	0.944636	0.43934	0.450902	1.02632	0.607473	0.632196	1.0407
ES55i	A	34	0	2	2	11.5745	0.772074	0.0667046	1.52588	0.0731586	0.0479452	0.921287	0.126677	0.1375	7.42226	0.471683	0.0635498	0.905657	0.0693695	0.0765957	1.27499	0.0777001	0.0609418
ES54i	G	35	0	2	2	9.10915	0.547251	0.0600771	1.14964	0.080997	0.0704545	0.627627	0.0806127	0.12844	5.61137	0.348048	0.0620256	0.670572	0.0655156	0.0977011	1.00304	0.0635728	0.0633803
	A	36	0	0	0	99.2981	0.701885	0.00706846	99.9347	0.0653202	0.000653629	99.9309	0.0690966	0.000691443	99.5075	0.492462	0.004949	99.9268	0.0732234	0.00073277	99.9152	0.0847637	0.000848356
ES53i	A	37	0	3	3	8.73189	3.53684	0.405049	1.15486	0.44679	0.386878	0.610353	0.426095	0.698113	5.36826	2.534	0.472034	0.662864	0.346848	0.523256	1.00304	0.384969	0.383803
ES52i	A	38	0	4	4	10.639	1.59679	0.150088	1.3665	0.237766	0.173996	0.800369	0.213048	0.266187	6.7272	1.12103	0.166641	0.805457	0.181131	0.22488	1.18316	0.176591	0.149254
ES51i	A	39	0	3	3	10.6884	2.78232	0.260312	1.38218	0.331827	0.240076	0.788852	0.374273	0.474453	6.75629	1.96465	0.290789	0.820873	0.262063	0.319249	1.18669	0.293141	0.247024
ES50i	G	40	0	5	5	10.6654	1.84026	0.172545	1.3874	0.182897	0.131827	0.760062	0.305176	0.401515	6.77188	1.23531	0.182418	0.809311	0.223524	0.27619	1.18669	0.211909	0.178571
ES49i	G	41	0	1	1	11.4605	1.70097	0.148421	1.48669	0.23254	0.156415	0.904013	0.20729	0.229299	7.39109	1.18336	0.160107	0.944196	0.150301	0.159184	1.29971	0.197782	0.152174
ES48i	G	42	0	4	4	10.5897	2.3228	0.219345	1.37956	0.303086	0.219697	0.771578	0.345483	0.447761	6.77292	1.5605	0.230403	0.801603	0.223524	0.278846	1.16903	0.279014	0.238671
ES47i	G	43	0	5	5	13.6473	0.686531	0.0503054	1.7349	0.0914483	0.0527108	1.15161	0.109403	0.095	8.79991	0.542332	0.0616293	1.07908	0.115616	0.107143	1.48337	0.098891	0.0666667
ES46i	A	44	0	3	3	13.9324	0.224823	0.0161366	1.77932	0.0287409	0.0161527	1.19192	0.0345483	0.0289855	9.02328	0.156881	0.0173863	1.1446	0.0231232	0.020202	1.51162	0.0494455	0.0327103
ES45i	A	45	0	2	2	14.0465	0.49132	0.0349781	1.76887	0.0914483	0.0516987	1.20919	0.161225	0.133333	9.12198	0.381295	0.0417995	1.19084	0.0770772	0.0647249	1.54341	0.0953592	0.0617849
ES44i	A	46	0	4	4	13.8666	0.548348	0.0395444	1.76103	0.067933	0.0385757	1.17464	0.109403	0.0931373	8.95263	0.450904	0.0503656	1.14074	0.0809311	0.0709459	1.50809	0.0918274	0.0608899
	G	47	1	1	0	99.1018	0.898194	0.00906334	99.8432	0.156768	0.00157015	99.7697	0.230322	0.00230854	99.2603	0.739733	0.00745245	99.8304	0.16957	0.00169858	99.7952	0.204846	0.00205266
ES43i	G	48	0	1	1	14.1134	0.342169	0.0242443	1.78977	0.0627074	0.0350365	1.22646	0.0806127	0.0657277	9.14276	0.304412	0.0332955	1.16387	0.0655156	0.0562914	1.5646	0.0494455	0.0316027
ES42i	A	49	0	5	5	14.0892	0.786331	0.0558107	1.78455	0.135866	0.0761347	1.20343	0.155467	0.129187	9.09601	0.687785	0.0756139	1.16387	0.146447	0.125828	1.554	0.151868	0.0977273
ES41i	A	50	0	1	1	14.7527	0.332299	0.0225245	1.92825	0.0496434	0.0257453	1.40496	0.0690966	0.0491803	9.69444	0.260777	0.0268996	1.27948	0.0578079	0.0451807	1.71293	0.0459137	0.0268041
ES40i	G	51	2	3	1	14.7209	0.854326	0.0580347	1.93609	0.177671	0.0917679	1.41072	0.224564	0.159184	9.62484	0.703369	0.0730786	1.2949	0.158008	0.122024	1.66702	0.222505	0.133475
ES39i	G	52	0	2	2	14.9951	0.618536	0.0412492	1.98835	0.128028	0.064389	1.50861	0.138193	0.0916031	9.86172	0.509086	0.0516224	1.34114	0.131031	0.0977011	1.71647	0.183655	0.106996
	G	53	0	0	0	99.4209	0.579055	0.00582428	99.9033	0.0966739	0.000967674	99.8964	0.103645	0.00103752	99.5169	0.483112	0.00485457	99.8767	0.123324	0.00123476	99.887	0.113018	0.00113146
	A	54	0	0	0	99.3124	0.687628	0.00692389	99.8458	0.154156	0.00154394	99.8215	0.178499	0.00178819	99.4608	0.539215	0.00542138	99.8574	0.142593	0.00142796	99.8234	0.176591	0.00176903
ES38i	A	55	0	3	3	14.7659	0.277464	0.0187908	1.93087	0.0444177	0.0230041	1.43951	0.0690966	0.048	9.66743	0.234803	0.024288	1.31417	0.0578079	0.0439883	1.69527	0.0565091	0.0333333
ES37i	G	56	2	3	1	15.2452	0.823618	0.0540249	2.01186	0.177671	0.0883117	1.5777	0.143951	0.0912409	10.0415	0.690902	0.068805	1.42978	0.150301	0.105121	1.80123	0.162464	0.0901961
	C	57	0	0	0	99.3859	0.61415	0.00617945	99.9059	0.0940611	0.000941496	99.8791	0.120919	0.00121065	99.5148	0.48519	0.00487555	99.869	0.131031	0.00131203	99.8764	0.123614	0.00123767
	C	58	0	0	0	99.9803	0.0197405	0.000197444	99.9843	0.0156768	0.000156793	99.9942	0.00575805	5.75838e-05	99.9823	0.0176622	0.000176653	100	0	0	100	0	0
ES36d	G	59	3	0	-3	15.6696	1.36539	0.0871361	2.08502	0.334439	0.160401	1.63529	0.299418	0.183099	10.4196	1.19583	0.114767	1.47988	0.342994	0.231771	1.88599	0.307268	0.162921
	C	60	0	0	0	99.2915	0.708465	0.0071352	99.8615	0.138479	0.00138671	99.8445	0.155467	0.00155709	99.4234	0.576617	0.00579962	99.8381	0.161862	0.00162125	99.8199	0.180123	0.00180448
	C	61	0	0	0	99.9583	0.0416744	0.000416918	99.9948	0.00522562	5.22589e-05	99.9885	0.0115161	0.000115174	99.9668	0.0332464	0.000332575	99.9923	0.00770772	7.70832e-05	99.9965	0.00353182	3.53195e-05
	A	62	0	0	0	99.8947	0.105283	0.00105394	99.9895	0.0104512	0.000104523	99.9942	0.00575805	5.75838e-05	99.9242	0.0758434	0.000759009	99.9807	0.0192693	0.00019273	99.9717	0.0282546	0.000282626
ES35i	A	63	0	1	1	14.0585	0.7633	0.0542944	1.92041	0.224701	0.117007	1.56043	0.132435	0.0848708	9.52406	0.700252	0.0735246	1.36427	0.177278	0.129944	1.78357	0.144805	0.0811881
ES34i	A	64	0	2	2	11.1764	5.44729	0.487391	1.53111	1.01638	0.663823	1.20919	0.863707	0.714286	7.50849	3.90126	0.519579	1.05981	0.928781	0.876364	1.38094	0.992442	0.71867
	C	65	0	0	0	94.4299	5.57012	0.0589868	99.1352	0.864839	0.00872384	99.2745	0.725514	0.00730816	96.1964	3.8036	0.0395399	99.3487	0.651303	0.00655572	99.117	0.882955	0.00890821
ES33d	A	66	4	0	-4	19.5025	2.0925	0.107293	3.57432	0.671492	0.187865	2.48172	0.47216	0.190255	13.5012	1.54388	0.114352	2.76322	0.501002	0.181311	2.95613	0.434414	0.146953
	G	67	0	0	0	98.8211	1.17895	0.0119301	99.5715	0.428501	0.00430345	99.7754	0.224564	0.00225069	99.0421	0.957912	0.00967177	99.6532	0.346848	0.00348055	99.6892	0.3108	0.00311769
ES32i	A	68	0	2	2	20.7067	1.14166	0.0551348	3.72848	0.329214	0.0882971	2.79265	0.155467	0.0556701	14.4549	0.891419	0.0616689	3.02528	0.204255	0.0675159	3.00911	0.229568	0.0762911
ES31i	A	69	0	3	3	17.4111	2.33267	0.133976	2.63894	0.896193	0.339604	2.14199	0.454886	0.212366	11.8596	1.74232	0.146912	2.01172	0.693695	0.344828	2.4193	0.476796	0.19708
ES30i	G	70	0	6	6	16.8047	6.10311	0.36318	2.54226	1.98312	0.780062	2.01532	1.15737	0.574286	11.3526	4.75424	0.418779	1.93849	1.71882	0.88668	2.28862	1.31737	0.575617
ES29i	A	71	0	1	1	19.0935	4.99764	0.261746	3.33394	1.70094	0.510188	2.66022	0.875223	0.329004	13.0544	3.89606	0.298448	2.58979	1.43749	0.55506	3.04796	0.879424	0.288528
	A	72	0	0	0	94.4463	5.55367	0.0588024	98.0064	1.99357	0.0203412	99.073	0.927046	0.0093572	95.705	4.29502	0.0448777	98.3505	1.64945	0.0167712	99.0005	0.999506	0.010096
ES28i	A	73	0	1	1	19.9324	4.19486	0.210454	3.62135	1.49975	0.414141	2.89054	0.725514	0.250996	13.7682	3.30074	0.239737	2.85186	1.27948	0.448649	3.2634	0.819383	0.251082
ES27i	G	74	0	1	1	23.0164	1.49151	0.064802	4.81541	0.658428	0.136734	3.52392	0.29366	0.0833333	16.2274	1.21453	0.0748447	3.86542	0.45861	0.118644	3.95917	0.374373	0.0945584
	A	75	0	0	0	96.4972	3.50285	0.0363	98.2808	1.71923	0.017493	99.2169	0.783094	0.00789275	97.2655	2.73452	0.028114	98.5818	1.41822	0.0143862	98.7533	1.24673	0.0126247
ES26i	G	76	0	4	4	22.4537	3.30763	0.147309	4.63512	2.06934	0.446449	3.56423	1.00766	0.282714	15.8284	2.7075	0.171053	3.83459	1.53769	0.401005	3.93798	1.47277	0.373991
	C	77	0	0	0	96.4851	3.51491	0.0364296	98.1684	1.83158	0.0186575	99.073	0.927046	0.0093572	97.2946	2.70543	0.0278066	98.6396	1.36041	0.0137918	98.725	1.27499	0.0129145
	A	78	0	0	0	99.1018	0.898194	0.00906334	99.5192	0.480757	0.00483079	99.7754	0.224564	0.00225069	99.2769	0.723109	0.00728376	99.6955	0.304455	0.00305385	99.6398	0.360246	0.00361548
	G	79	0	0	0	91.7232	8.27676	0.0902363	94.4844	5.51564	0.0583762	97.4895	2.51051	0.0257516	93.0567	6.9433	0.0746137	95.1172	4.88284	0.051335	96.3269	3.67309	0.0381316
ES25i	G	80	0	2	2	22.9462	3.13984	0.136835	5.10543	1.82113	0.356704	4.00184	0.921287	0.230216	16.3032	2.54854	0.156322	4.22383	1.49144	0.353102	4.56665	1.50102	0.328693
	A	81	0	0	0	82.6349	17.3651	0.210142	85.3578	14.6422	0.171539	94.1153	5.88472	0.0625268	84.7441	15.2559	0.180024	84.4959	15.5041	0.183489	91.7249	8.27506	0.090216
ES24i	A	82	0	1	1	38.1518	1.76787	0.0463378	18.773	1.06603	0.056785	9.34531	0.67945	0.0727049	29.9155	1.35479	0.0452872	19.0034	0.870973	0.0458325	12.1989	0.918274	0.075275
	A	83	0	0	0	95.7328	4.26724	0.0445745	97.3036	2.69642	0.0277114	98.2668	1.73317	0.0176374	96.6473	3.35269	0.03469	97.9459	2.05411	0.0209719	97.4112	2.58883	0.0265763
ES23i	G	84	0	1	1	36.3917	4.18718	0.115059	17.336	3.15888	0.182216	8.56797	1.80227	0.210349	28.5545	3.42022	0.119779	17.828	2.90581	0.162992	11.0935	2.71597	0.244826
	G	85	0	0	0	94.3268	5.67321	0.0601442	95.7542	4.24581	0.0443408	97.4952	2.50475	0.025691	95.4962	4.50385	0.0471626	96.5778	3.42223	0.035435	96.3799	3.62012	0.0375609
ES22d	A	86	2	0	-2	39.5238	6.70629	0.169677	20.359	6.53463	0.32097	11.6255	3.54696	0.305102	31.0615	5.7828	0.186173	20.5912	5.55341	0.269699	14.7136	5.25535	0.357177
ES21i	G	87	0	6	6	37.4894	9.44694	0.251989	18.9193	8.32702	0.440133	10.4509	4.92313	0.471074	29.501	7.89706	0.267688	19.7241	6.82519	0.346034	13.1278	7.50159	0.571429
ES20i	G	88	0	2	2	39.3834	7.07259	0.179583	20.2466	6.69924	0.330881	12.1437	3.63909	0.299668	31.0937	5.90955	0.190056	20.8147	5.72298	0.274949	15.8155	5.44254	0.344127
ES19i	G	89	0	5	5	38.9524	7.60339	0.195197	19.9148	6.96052	0.349515	12.0343	4.16883	0.346411	30.7623	6.38643	0.207606	20.6259	5.63049	0.272982	15.8155	6.0041	0.379634
ES18i	G	90	0	2	2	40.3255	5.06783	0.125673	21.1376	5.11327	0.241904	12.9383	2.78689	0.215398	31.9051	4.27528	0.134	21.6163	4.23539	0.195935	17.2141	4.05806	0.235741
ES17i	G	91	0	3	3	43.3941	6.0077	0.138445	23.1965	5.59141	0.241045	13.9633	3.40876	0.244124	34.4589	5.00255	0.145174	22.7224	4.55141	0.200305	19.033	4.84213	0.254407
ES16i	A	92	0	3	3	45.1729	4.91868	0.108886	26.5801	2.97076	0.111766	15.8577	2.04411	0.128903	36.0381	4.07372	0.113039	26.1716	1.83829	0.07024	21.2863	3.21043	0.150821
	G	93	0	0	0	94.2643	5.73572	0.0608472	96.7418	3.25817	0.033679	97.6219	2.37807	0.02436	95.3278	4.67216	0.0490115	98.0577	1.94235	0.0198082	96.394	3.60599	0.0374089
ES15i	G	94	0	4	4	45.0347	4.04571	0.0898354	26.6271	2.2444	0.0842901	15.8807	1.83106	0.115301	35.9321	3.33087	0.0926991	26.2294	1.30646	0.049809	21.2792	2.76542	0.129959
ES14i	A	95	0	1	1	49.8108	1.02322	0.0205421	29.3105	0.574818	0.0196113	17.9133	0.437612	0.0244294	39.8261	0.936094	0.0235046	27.8981	0.312163	0.0111894	24.4049	0.713428	0.029233
ES13i	G	96	0	4	4	45.3528	5.62715	0.124075	26.7578	3.16411	0.11825	16.1398	2.33777	0.144845	36.2033	4.69086	0.12957	26.2602	1.99245	0.0758732	21.5759	3.68722	0.170895
	A	97	0	0	0	97.8263	2.17365	0.0222195	98.8086	1.19144	0.0120581	98.549	1.45103	0.0147239	97.9595	2.0405	0.02083	99.314	0.685987	0.00690726	98.2765	1.72353	0.0175376
ES12i	G	98	0	3	3	45.6467	1.80297	0.0394983	26.7996	0.854388	0.0318807	17.0093	1.19767	0.070413	36.2895	1.547	0.0426293	26.3065	0.474025	0.0180193	22.5048	1.38801	0.0616761
	A	99	0	0	0	98.1959	1.80406	0.0183721	99.0829	0.917096	0.00925584	99.1881	0.811885	0.0081853	98.4738	1.52622	0.0154987	99.5684	0.431632	0.00433504	98.6968	1.30324	0.0132045
	A	100	0	0	0	95.0682	4.93184	0.0518769	97.2252	2.7748	0.0285399	98.0365	1.96349	0.0200282	95.9273	4.07268	0.0424559	98.3159	1.68414	0.0171299	96.779	3.22102	0.0332822
	G	101	0	0	0	91.686	8.31405	0.0906796	95.31	4.68999	0.0492077	95.4684	4.53158	0.0474668	92.8209	7.17915	0.0773441	97.0865	2.91352	0.0300095	93.4873	6.51268	0.0696638
ES11i	A	102	0	2	2	46.7269	8.23289	0.176192	27.2255	4.8964	0.179846	19.0476	5.06132	0.265719	37.2329	7.20304	0.193459	26.634	3.03299	0.113876	24.8782	6.98594	0.280806
ES10i	A	103	0	2	2	47.1129	9.41184	0.199772	27.6069	5.385	0.19506	20.015	5.87897	0.293728	37.691	8.14225	0.216026	26.8576	3.27193	0.121825	25.8529	8.08081	0.312568
ES9i	A	104	0	1	1	48.86	1.5255	0.0312219	28.3281	0.770778	0.027209	21.7366	1.56619	0.072053	39.4022	1.27064	0.0322479	27.4125	0.43934	0.016027	28.0497	1.74119	0.062075
ES8i	G	105	0	2	2	55.4391	2.32061	0.0418587	32.4067	1.08432	0.0334596	25.6348	2.56233	0.0999551	45.0676	2.01972	0.0448153	29.983	0.635887	0.0212082	33.3651	3.09741	0.0928337
ES7i	G	106	0	2	2	48.9664	9.6575	0.197227	28.2236	5.64889	0.200148	24.7366	5.86169	0.236965	39.584	8.6129	0.217585	27.3277	3.55326	0.130024	31.6592	8.05962	0.254574
ES6i	G	107	0	1	1	48.0934	11.5921	0.241033	27.8107	6.61563	0.23788	24.3911	9.74262	0.399433	39.05	10.2773	0.263183	27.1774	4.0928	0.150596	31.7829	11.542	0.363151
	A	108	0	0	0	88.1678	11.8322	0.134202	93.2041	6.79591	0.0729143	89.3188	10.6812	0.119585	89.3611	10.6389	0.119055	95.7453	4.25466	0.0444373	87.4797	12.5203	0.143122
	A	109	0	0	0	87.7532	12.2468	0.13956	92.5849	7.41515	0.0800903	86.1116	13.8884	0.161284	88.7295	11.2705	0.127021	95.0324	4.96763	0.052273	84.9686	15.0314	0.176906
	A	110	0	0	0	99.4835	0.516544	0.00519226	99.5323	0.467693	0.0046989	99.3321	0.667933	0.00672425	99.5283	0.471683	0.00473919	99.5838	0.416217	0.00417957	99.3325	0.667514	0.00672
ES5i	G	111	0	2	2	48.1778	0.309268	0.0064193	27.7689	0.222089	0.00799774	24.9381	0.333967	0.0133918	39.078	0.272205	0.00696568	27.1582	0.154154	0.00567617	32.2703	0.370841	0.0114917
ES4d	G	112	2	0	-2	50.7342	1.19211	0.0234971	28.9159	1.14441	0.0395771	38.0549	2.61991	0.0688455	41.9757	1.32674	0.0316073	28.2796	0.944196	0.0333878	43.2648	2.47934	0.0573061
ES3i	G	113	1	4	3	51.2837	1.51563	0.0295539	29.1276	0.919708	0.0315752	40.0875	2.59112	0.0646366	42.6738	1.39323	0.0326484	28.48	0.720672	0.0253045	45.3627	2.59236	0.0571473
ES2i	A	114	0	2	2	53.2128	0.0690918	0.00129841	30.3765	0.0496434	0.00163427	43.7266	0.109403	0.00250198	44.6821	0.0592202	0.00132537	29.5398	0.0423925	0.00143509	48.8522	0.109486	0.00224118
ES1d	G	115	4	2	-2	54.1373	2.1232	0.0392189	31.5	2.25224	0.0714997	45.4598	3.18996	0.070171	45.7034	2.20257	0.0481928	30.4802	2.03099	0.0666329	50.2614	2.91728	0.0580423
	G	116	0	0	0
	A	117	0	0	0
	G	118	0	0	0
	A	119	2	2	0
	A	120	1	1	0
	G	121	0	0	0
	A	122	0	0	0
	A	123	0	0	0
	A	124	1	1	0
	A	125	0	0	0
	G	126	0	0	0
	A	127	0	0	0
	C	128	1	1	0
	A	129	0	0	0
	A	130	0	0	0
	A	131	0	0	0
	A	132	1	1	0
	A	133	0	0	0
	G	134	0	0	0
	A	135	2	2	0
	A	136	0	0	0
	A	137	1	1	0
	A	138	0	0	0

## Sheet: A6_CorInc ratio_RNAi_RESC6-IP
Supplementary Table S3. A6 Cor, Inc, and Ratio values: RESC6-IP libraries
Notes: See the suplementary table legend for additional details.
						KH2F1-RNAi - 0-4 Day - RESC6-IP
						J79 - F1-RNAi 0 Day - RESC6-IP			J80 - F1-RNAi 3 Day - RESC6-IP			J81 - F1-RNAi 4 Day - RESC6-IP			J88 - F1-RNAi 0 Day - RESC6-IP - Bio Rep			J89 - F1-RNAi 3 Day - RESC6-IP - Bio Rep			J90 - F1-RNAi 4 Day - RESC6-IP - Bio Rep
			Ts 5' to T-str position			17367 Reads			18653 Reads			21139 Reads			28314 Reads			20940 Reads			20738 Reads
Canonical Editing Site (ES)	sequence	T-stripped	pre-edited	edited	editing events; del = -; ins = +	Correct %	Incorrect %	Ratio	Correct %	Incorrect %	Ratio	Correct %	Incorrect %	Ratio	Correct %	Incorrect %	Ratio	Correct %	Incorrect %	Ratio	Correct %	Incorrect %	Ratio
	A	1
	C	2
	G	3
	G	4
	C	5
	G	6
	G	7
	G	8
	A	9
	A	10
	A	11
	A	12
	C	13
	A	14	0	0	0
ES68i	C	15	0	1	1
	C	16	0	0	0	99.977	0.0230322	0.000230375	99.9946	0.00536107	5.36136e-05	100	0	0	99.9965	0.00353182	3.53195e-05	99.9952	0.00477555	4.77578e-05	100	0	0
	C	17	0	0	0	99.9942	0.00575805	5.75838e-05	99.9946	0.00536107	5.36136e-05	99.9858	0.0141918	0.000141938	99.9929	0.00706364	7.06414e-05	99.9952	0.00477555	4.77578e-05	100	0	0
	A	18	0	0	0	99.9942	0.00575805	5.75838e-05	99.9678	0.0321664	0.000321768	100	0	0	99.9717	0.0282546	0.000282626	100	0	0	100	0	0
ES67i	A	19	5	6	1	0.0575805	0.460644	8	0.0482496	1.00788	20.8889	0.0662283	0.709589	10.7143	0.0459137	0.628664	13.6923	0.052531	0.873926	16.6364	0.0578648	0.665445	11.5
ES66i	G	20	0	2	2	0.0978868	0.166983	1.70588	0.0375275	0.627245	16.7143	0.0283836	0.288566	10.1667	0.105955	0.356714	3.36667	0.0811843	0.434575	5.35294	0.0192883	0.3279	17
ES65i	G	21	0	2	2	0.213048	0.0863707	0.405405	0.455691	0.134027	0.294118	0.245991	0.0662283	0.269231	0.339055	0.141273	0.416667	0.382044	0.105062	0.275	0.236281	0.0530427	0.22449
	A	22	0	0	0	99.8157	0.184257	0.00184598	99.7319	0.268053	0.00268774	99.9054	0.0946119	0.000947015	99.7316	0.268418	0.00269141	99.7947	0.205349	0.00205771	99.9132	0.0867972	0.000868726
ES64i	G	23	0	1	1	0.201532	0.0978868	0.485714	0.477135	0.0911382	0.191011	0.222338	0.0520365	0.234043	0.399096	0.102423	0.256637	0.377268	0.0859599	0.227848	0.226637	0.00964413	0.0425532
ES63i	G	24	0	6	6	0.155467	0.201532	1.2963	0.209082	0.30022	1.4359	0.113534	0.127726	1.125	0.296673	0.27195	0.916667	0.148042	0.238777	1.6129	0.0867972	0.120552	1.38889
	A	25	0	0	0	99.8157	0.184257	0.00184598	99.8981	0.10186	0.00101964	99.9007	0.0993424	0.000994412	99.8234	0.176591	0.00176903	99.8376	0.162369	0.00162633	99.9277	0.072331	0.000723833
ES62i	A	26	1	8	7	0.149709	0.345483	2.30769	0.10186	1.20624	11.8421	0.0614977	0.709589	11.5385	0.261355	0.462669	1.77027	0.0716332	1.06972	14.9333	0.0433986	0.795641	18.3333
ES61i	A	27	0	4	4	0.166983	0.259112	1.55172	0.128666	0.7023	5.45833	0.0614977	0.411562	6.69231	0.282546	0.377905	1.3375	0.0907354	0.692455	7.63158	0.0530427	0.332723	6.27273
ES60i	G	28	0	5	5	0.333967	0.184257	0.551724	0.986436	0.15011	0.152174	0.491982	0.0567671	0.115385	0.529773	0.2331	0.44	0.802292	0.12894	0.160714	0.429164	0.0771531	0.179775
ES59i	A	29	0	12	12	0.201532	0.380031	1.88571	0.471774	0.686217	1.45455	0.217607	0.335872	1.54348	0.339055	0.476796	1.40625	0.444126	0.515759	1.16129	0.216993	0.265214	1.22222
ES58i	G	30	0	1	1	0.50095	0.0806127	0.16092	1.44749	0.160832	0.111111	0.818393	0.0709589	0.0867052	0.815851	0.098891	0.121212	1.39924	0.114613	0.0819113	0.877616	0.0289324	0.032967
	G	31	0	0	0	99.6257	0.374273	0.00375679	99.3459	0.65405	0.00658356	99.579	0.421023	0.00422803	99.6221	0.377905	0.00379338	99.1929	0.807068	0.00813634	99.5178	0.482207	0.00484543
ES57i	G	32	0	1	1	0.535498	0.20729	0.387097	1.42068	0.0911382	0.0641509	0.728511	0.0425753	0.0584416	0.921805	0.173059	0.187739	1.28462	0.124164	0.0966543	0.771531	0.0289324	0.0375
ES56i	G	33	0	6	6	0.362757	0.535498	1.47619	0.423524	1.32418	3.12658	0.165571	0.747434	4.51429	0.607473	0.632196	1.0407	0.353391	1.26074	3.56757	0.197705	0.708844	3.58537
ES55i	A	34	0	2	2	0.921287	0.126677	0.1375	1.79596	0.0589717	0.0328358	0.983963	0.0331141	0.0336538	1.27499	0.0777001	0.0609418	1.65712	0.0764088	0.0461095	1.00781	0.0289324	0.0287081
ES54i	G	35	0	2	2	0.627627	0.0806127	0.12844	1.31882	0.0268053	0.0203252	0.695397	0.00946119	0.0136054	1.00304	0.0635728	0.0633803	1.17956	0.0429799	0.0364372	0.689555	0.0144662	0.020979
	A	36	0	0	0	99.9309	0.0690966	0.000691443	99.941	0.0589717	0.000590065	99.9669	0.0331141	0.000331251	99.9152	0.0847637	0.000848356	99.957	0.0429799	0.000429984	99.9855	0.0144662	0.000144683
ES53i	A	37	0	3	3	0.610353	0.426095	0.698113	1.32418	0.482496	0.364372	0.681205	0.307489	0.451389	1.00304	0.384969	0.383803	1.19389	0.477555	0.4	0.713666	0.313434	0.439189
ES52i	A	38	0	4	4	0.800369	0.213048	0.266187	1.67801	0.160832	0.0958466	0.908274	0.0993424	0.109375	1.18316	0.176591	0.149254	1.5616	0.124164	0.0795107	0.935481	0.0578648	0.0618557
ES51i	A	39	0	3	3	0.788852	0.374273	0.474453	1.66729	0.209082	0.125402	0.87516	0.132457	0.151351	1.18669	0.293141	0.247024	1.5425	0.281757	0.182663	0.945125	0.0819751	0.0867347
ES50i	G	40	0	5	5	0.760062	0.305176	0.401515	1.60296	0.192998	0.120401	0.818393	0.170301	0.208092	1.18669	0.211909	0.178571	1.47087	0.281757	0.191558	0.867972	0.11573	0.133333
ES49i	G	41	0	1	1	0.904013	0.20729	0.229299	1.81204	0.0964992	0.0532544	0.983963	0.0709589	0.0721154	1.29971	0.197782	0.152174	1.71442	0.133715	0.0779944	0.949947	0.0530427	0.0558376
ES48i	G	42	0	4	4	0.771578	0.345483	0.447761	1.53863	0.166193	0.108014	0.808931	0.0709589	0.0877193	1.16903	0.279014	0.238671	1.44699	0.138491	0.0957096	0.853506	0.0626869	0.0734463
ES47i	G	43	0	5	5	1.15161	0.109403	0.095	2.09082	0.0482496	0.0230769	1.21576	0.0567671	0.0466926	1.48337	0.098891	0.0666667	2.07736	0.0143266	0.00689655	1.17658	0.0433986	0.0368852
ES46i	A	44	0	3	3	1.19192	0.0345483	0.0289855	2.08546	0.0268053	0.0128535	1.22049	0.00946119	0.00775194	1.51162	0.0494455	0.0327103	2.07259	0.0238777	0.0115207	1.18141	0.0144662	0.0122449
ES45i	A	45	0	2	2	1.20919	0.161225	0.133333	2.06401	0.0857771	0.0415584	1.21103	0.0283836	0.0234375	1.54341	0.0953592	0.0617849	2.05349	0.0620821	0.0302326	1.15247	0.0385765	0.0334728
ES44i	A	46	0	4	4	1.17464	0.109403	0.0931373	1.99432	0.080416	0.0403226	1.13534	0.0425753	0.0375	1.50809	0.0918274	0.0608899	1.9914	0.105062	0.0527578	1.10908	0.0578648	0.0521739
	G	47	1	1	0	99.7697	0.230322	0.00230854	99.5926	0.407441	0.00409108	99.7114	0.288566	0.00289401	99.7952	0.204846	0.00205266	99.7421	0.25788	0.00258546	99.7396	0.260392	0.00261071
ES43i	G	48	0	1	1	1.22646	0.0806127	0.0657277	1.99968	0.0643328	0.0321716	1.09277	0.00473059	0.004329	1.5646	0.0494455	0.0316027	2.00573	0.0477555	0.0238095	1.08014	0.0289324	0.0267857
ES42i	A	49	0	5	5	1.20343	0.155467	0.129187	1.95143	0.332386	0.17033	1.04546	0.23653	0.226244	1.554	0.151868	0.0977273	1.96275	0.234002	0.119221	1.05603	0.207349	0.196347
ES41i	A	50	0	1	1	1.40496	0.0690966	0.0491803	2.27845	0.0160832	0.00705882	1.30091	0.0141918	0.0109091	1.71293	0.0459137	0.0268041	2.2063	0.0286533	0.012987	1.29231	0	0
ES40i	G	51	2	3	1	1.41072	0.224564	0.159184	2.32134	0.15011	0.0646651	1.34822	0.0804201	0.0596491	1.66702	0.222505	0.133475	2.23496	0.0811843	0.0363248	1.3116	0.0675089	0.0514706
ES39i	G	52	0	2	2	1.50861	0.138193	0.0916031	2.35887	0.075055	0.0318182	1.36241	0.0662283	0.0486111	1.71647	0.183655	0.106996	2.24928	0.052531	0.0233546	1.32125	0.0433986	0.0328467
	G	53	0	0	0	99.8964	0.103645	0.00103752	99.9732	0.0268053	0.000268125	99.9858	0.0141918	0.000141938	99.887	0.113018	0.00113146	99.9666	0.0334288	0.0003344	99.9807	0.0192883	0.00019292
	A	54	0	0	0	99.8215	0.178499	0.00178819	99.9142	0.0857771	0.000858507	99.9148	0.0851507	0.000852232	99.8234	0.176591	0.00176903	99.914	0.0859599	0.000860338	99.9518	0.0482207	0.000482439
ES38i	A	55	0	3	3	1.43951	0.0690966	0.048	2.33206	0.0375275	0.016092	1.33876	0.0189224	0.0141343	1.69527	0.0565091	0.0333333	2.23496	0.0286533	0.0128205	1.3116	0.0192883	0.0147059
ES37i	G	56	2	3	1	1.5777	0.143951	0.0912409	2.36959	0.112582	0.0475113	1.3766	0.0425753	0.0309278	1.80123	0.162464	0.0901961	2.27316	0.0859599	0.0378151	1.33571	0.0289324	0.0216606
	C	57	0	0	0	99.8791	0.120919	0.00121065	99.9142	0.0857771	0.000858507	99.9669	0.0331141	0.000331251	99.8764	0.123614	0.00123767	99.914	0.0859599	0.000860338	99.9904	0.00964413	9.64506e-05
	C	58	0	0	0	99.9942	0.00575805	5.75838e-05	100	0	0	100	0	0	100	0	0	100	0	0	100	0	0
ES36d	G	59	3	0	-3	1.63529	0.299418	0.183099	2.42856	0.176915	0.0728477	1.37187	0.0993424	0.0724138	1.88599	0.307268	0.162921	2.35435	0.162369	0.0689655	1.32125	0.0675089	0.0510949
	C	60	0	0	0	99.8445	0.155467	0.00155709	99.8874	0.112582	0.00112709	99.9763	0.023653	0.000236586	99.8199	0.180123	0.00180448	99.8806	0.119389	0.00119531	99.9711	0.0289324	0.000289408
	C	61	0	0	0	99.9885	0.0115161	0.000115174	99.9946	0.00536107	5.36136e-05	99.9953	0.00473059	4.73082e-05	99.9965	0.00353182	3.53195e-05	99.9952	0.00477555	4.77578e-05	100	0	0
	A	62	0	0	0	99.9942	0.00575805	5.75838e-05	99.941	0.0589717	0.000590065	99.9905	0.00946119	9.46208e-05	99.9717	0.0282546	0.000282626	99.9522	0.0477555	0.000477783	100	0	0
ES35i	A	63	0	1	1	1.56043	0.132435	0.0848708	1.99968	0.075055	0.0375335	0.983963	0.0567671	0.0576923	1.78357	0.144805	0.0811881	1.90544	0.0716332	0.037594	1.05603	0.0192883	0.0182648
ES34i	A	64	0	2	2	1.20919	0.863707	0.714286	0.95427	1.45285	1.52247	0.425753	0.870429	2.04444	1.38094	0.992442	0.71867	0.840497	1.37058	1.63068	0.366477	0.72331	1.97368
	C	65	0	0	0	99.2745	0.725514	0.00730816	98.4399	1.56007	0.0158479	99.0775	0.922466	0.00931054	99.117	0.882955	0.00890821	98.3954	1.60458	0.0163075	99.0886	0.91137	0.00919753
ES33d	A	66	4	0	-4	2.48172	0.47216	0.190255	4.57299	0.434247	0.094959	2.68225	0.354794	0.132275	2.95613	0.434414	0.146953	4.69436	0.453677	0.0966429	2.33388	0.274858	0.117769
	G	67	0	0	0	99.7754	0.224564	0.00225069	99.807	0.192998	0.00193372	99.8865	0.113534	0.00113663	99.6892	0.3108	0.00311769	99.7326	0.267431	0.00268148	99.918	0.0819751	0.000820424
ES32i	A	68	0	2	2	2.79265	0.155467	0.0556701	4.12802	0.123305	0.0298701	2.34164	0.0851507	0.0363636	3.00911	0.229568	0.0762911	4.3171	0.143266	0.0331858	2.08313	0.072331	0.0347222
ES31i	A	69	0	3	3	2.14199	0.454886	0.212366	2.66981	0.55219	0.206827	1.45229	0.250721	0.172638	2.4193	0.476796	0.19708	2.55014	0.496657	0.194757	1.35982	0.192883	0.141844
ES30i	G	70	0	6	6	2.01532	1.15737	0.574286	2.59476	2.02648	0.780992	1.40972	1.18265	0.838926	2.28862	1.31737	0.575617	2.50716	2.26839	0.904762	1.32607	0.988523	0.745455
ES29i	A	71	0	1	1	2.66022	0.875223	0.329004	3.13086	1.7209	0.549658	1.66517	1.00762	0.605114	3.04796	0.879424	0.288528	3.07545	1.78606	0.580745	1.56235	0.761886	0.487654
	A	72	0	0	0	99.073	0.927046	0.0093572	97.9628	2.03721	0.0207957	98.8694	1.13061	0.0114354	99.0005	0.999506	0.010096	98.0277	1.9723	0.0201198	99.0983	0.901726	0.00909931
ES28i	A	73	0	1	1	2.89054	0.725514	0.250996	3.39356	1.60296	0.472354	1.7787	1.02654	0.577128	3.2634	0.819383	0.251082	3.19962	1.73352	0.541791	1.60575	0.785997	0.489489
ES27i	G	74	0	1	1	3.52392	0.29366	0.0833333	4.69093	0.546829	0.116571	2.69171	0.373717	0.13884	3.95917	0.374373	0.0945584	4.81853	0.415473	0.086224	2.30977	0.27968	0.121086
	A	75	0	0	0	99.2169	0.783094	0.00789275	98.4346	1.56543	0.0159033	98.8599	1.14007	0.0115322	98.7533	1.24673	0.0126247	98.7249	1.27507	0.0129154	98.944	1.05603	0.010673
ES26i	G	76	0	4	4	3.56423	1.00766	0.282714	4.37463	1.39924	0.319853	2.38895	0.903543	0.378218	3.93798	1.47277	0.373991	4.5511	1.45654	0.320042	2.08795	0.810107	0.387991
	C	77	0	0	0	99.073	0.927046	0.0093572	98.96	1.04005	0.0105098	99.4607	0.539288	0.00542212	98.725	1.27499	0.0129145	99.0258	0.974212	0.00983796	99.5419	0.458096	0.00460204
	A	78	0	0	0	99.7754	0.224564	0.00225069	99.807	0.192998	0.00193372	99.9196	0.0804201	0.000804848	99.6398	0.360246	0.00361548	99.8567	0.143266	0.00143472	99.947	0.0530427	0.000530709
	G	79	0	0	0	97.4895	2.51051	0.0257516	96.5796	3.42036	0.0354149	97.6063	2.39368	0.0245238	96.3269	3.67309	0.0381316	96.4565	3.54346	0.0367363	98.0037	1.99634	0.02037
ES25i	G	80	0	2	2	4.00184	0.921287	0.230216	3.69914	1.66729	0.450725	1.93481	1.15426	0.596577	4.56665	1.50102	0.328693	3.74403	1.32283	0.353316	1.78899	0.86315	0.48248
	A	81	0	0	0	94.1153	5.88472	0.0625268	83.6809	16.3191	0.195016	86.4847	13.5153	0.156274	91.7249	8.27506	0.090216	82.1442	17.8558	0.217371	86.4789	13.5211	0.156351
ES24i	A	82	0	1	1	9.34531	0.67945	0.0727049	17.654	0.80416	0.0455512	13.17	0.55821	0.0423851	12.1989	0.918274	0.075275	19.3983	0.706781	0.0364353	13.1787	0.41952	0.0318332
	A	83	0	0	0	98.2668	1.73317	0.0176374	97.298	2.70198	0.0277701	97.7104	2.28961	0.0234326	97.4112	2.58883	0.0265763	97.4833	2.51671	0.0258169	98.2544	1.74559	0.017766
ES23i	G	84	0	1	1	8.56797	1.80227	0.210349	13.5099	4.61588	0.341667	9.83963	4.05412	0.412019	11.0935	2.71597	0.244826	14.575	4.77555	0.327654	9.87077	3.8239	0.387396
	G	85	0	0	0	97.4952	2.50475	0.025691	85.4769	14.5231	0.169907	81.4561	18.5439	0.227655	96.3799	3.62012	0.0375609	84.3935	15.6065	0.184925	80.5333	19.4667	0.241722
ES22d	A	86	2	0	-2	11.6255	3.54696	0.305102	33.2172	7.71994	0.232408	35.3754	7.52637	0.212757	14.7136	5.25535	0.357177	35.5969	7.98949	0.224443	36.2909	7.45491	0.205421
ES21i	G	87	0	6	6	10.4509	4.92313	0.471074	25.9958	9.18351	0.353269	26.2879	8.35896	0.317977	13.1278	7.50159	0.571429	28.639	9.26934	0.323662	28.2814	7.92265	0.280136
ES20i	G	88	0	2	2	12.1437	3.63909	0.299668	27.7221	7.14094	0.25759	27.48	6.75529	0.245825	15.8155	5.44254	0.344127	30.3343	7.37822	0.24323	29.458	6.58212	0.223441
ES19i	G	89	0	5	5	12.0343	4.16883	0.346411	26.8214	9.59095	0.357585	26.3068	9.6173	0.365582	15.8155	6.0041	0.379634	29.5415	9.83763	0.33301	28.4984	8.75205	0.307107
ES18i	G	90	0	2	2	12.9383	2.78689	0.215398	28.478	5.82212	0.204443	27.7307	5.98893	0.215967	17.2141	4.05806	0.235741	31.17	5.75454	0.184618	29.7955	5.73344	0.192426
ES17i	G	91	0	3	3	13.9633	3.40876	0.244124	35.6565	7.05517	0.197865	33.1615	7.83386	0.236234	19.033	4.84213	0.254407	37.235	7.29226	0.195845	34.0631	7.23792	0.212486
ES16i	A	92	0	3	3	15.8577	2.04411	0.128903	33.8605	11.3172	0.334231	33.0243	10.1613	0.307692	21.2863	3.21043	0.150821	36.6285	10.1242	0.276402	34.7478	8.31806	0.239384
	G	93	0	0	0	97.6219	2.37807	0.02436	88.0716	11.9284	0.135439	91.0781	8.9219	0.0979588	96.394	3.60599	0.0374089	89.766	10.234	0.114008	92.7524	7.24756	0.0781388
ES15i	G	94	0	4	4	15.8807	1.83106	0.115301	32.9598	8.65276	0.262524	32.362	5.85647	0.180968	21.2792	2.76542	0.129959	35.9599	7.26361	0.201992	34.3186	4.72562	0.137698
ES14i	A	95	0	1	1	17.9133	0.437612	0.0244294	40.6851	1.88173	0.0462512	36.752	1.36241	0.0370704	24.4049	0.713428	0.029233	42.8653	1.67622	0.0391043	37.9352	1.12836	0.0297445
ES13i	G	96	0	4	4	16.1398	2.33777	0.144845	33.2386	8.63132	0.259677	32.362	5.27934	0.163134	21.5759	3.68722	0.170895	36.0793	7.88443	0.218531	34.362	4.3061	0.125316
	A	97	0	0	0	98.549	1.45103	0.0147239	97.2283	2.77167	0.0285068	97.857	2.14296	0.0218989	98.2765	1.72353	0.0175376	97.7268	2.27316	0.0232604	98.1965	1.80345	0.0183657
ES12i	G	98	0	3	3	17.0093	1.19767	0.070413	33.185	1.82812	0.0550889	32.3573	1.80236	0.0557018	22.5048	1.38801	0.0616761	36.0649	1.42311	0.0394597	34.2463	1.42733	0.0416784
	A	99	0	0	0	99.1881	0.811885	0.0081853	98.2845	1.71554	0.0174549	98.2024	1.79763	0.0183053	98.6968	1.30324	0.0132045	98.596	1.40401	0.01424	98.592	1.40804	0.0142815
	A	100	0	0	0	98.0365	1.96349	0.0200282	95.0625	4.93754	0.05194	97.2988	2.70117	0.0277616	96.779	3.22102	0.0332822	95.32	4.68004	0.0490982	97.6902	2.30977	0.0236438
	G	101	0	0	0	95.4684	4.53158	0.0474668	78.5772	21.4228	0.272634	69.4829	30.5171	0.439202	93.4873	6.51268	0.0696638	80.1146	19.8854	0.248212	69.7946	30.2054	0.432776
ES11i	A	102	0	2	2	19.0476	5.06132	0.265719	35.115	33.7586	0.961374	34.6232	54.6573	1.57863	24.8782	6.98594	0.280806	37.8606	30.4155	0.803355	36.0112	55.2319	1.53374
ES10i	A	103	0	2	2	20.015	5.87897	0.293728	35.367	34.5146	0.975898	34.6705	55.2581	1.59381	25.8529	8.08081	0.312568	38.0707	31.2369	0.820497	36.0064	55.7768	1.54908
ES9i	A	104	0	1	1	21.7366	1.56619	0.072053	38.2619	1.30274	0.0340479	36.8702	0.842046	0.0228381	28.0497	1.74119	0.062075	40.7402	1.08405	0.0266088	38.2583	0.843862	0.022057
ES8i	G	105	0	2	2	25.6348	2.56233	0.0999551	68.82	2.99684	0.043546	89.5075	1.98212	0.0221447	33.3651	3.09741	0.0928337	68.4145	2.54059	0.0371353	91.571	1.79381	0.0195893
ES7i	G	106	0	2	2	24.7366	5.86169	0.236965	36.852	36.0639	0.978615	35.4889	56.6252	1.59557	31.6592	8.05962	0.254574	39.6036	32.3591	0.817075	36.8165	56.9968	1.54813
ES6i	G	107	0	1	1	24.3911	9.74262	0.399433	36.1711	38.3209	1.05943	35.049	57.9971	1.65474	31.7829	11.542	0.363151	39.3362	34.0115	0.864635	36.3728	58.048	1.59592
	A	108	0	0	0	89.3188	10.6812	0.119585	61.4003	38.5997	0.628656	41.932	58.068	1.38481	87.4797	12.5203	0.143122	65.6256	34.3744	0.523796	41.9905	58.0095	1.38149
	A	109	0	0	0	86.1116	13.8884	0.161284	60.4407	39.5593	0.654515	41.5866	58.4134	1.40462	84.9686	15.0314	0.176906	64.107	35.893	0.559893	41.788	58.212	1.39303
	A	110	0	0	0	99.3321	0.667933	0.00672425	99.2977	0.7023	0.00707267	99.4181	0.581863	0.00585268	99.3325	0.667514	0.00672	99.4031	0.596944	0.00600528	99.5757	0.424342	0.0042615
ES5i	G	111	0	2	2	24.9381	0.333967	0.0133918	36.2301	0.30022	0.00828648	35.0206	0.32168	0.00918547	32.2703	0.370841	0.0114917	39.2884	0.329513	0.00838702	36.2668	0.366477	0.010105
ES4d	G	112	2	0	-2	38.0549	2.61991	0.0688455	39.9346	1.06149	0.0265807	36.3546	0.553479	0.0152245	43.2648	2.47934	0.0573061	42.1299	1.08405	0.0257311	37.2553	0.554538	0.0148848
ES3i	G	113	1	4	3	40.0875	2.59112	0.0646366	40.2777	1.20088	0.029815	36.4019	0.780548	0.0214425	45.3627	2.59236	0.0571473	42.5931	1.04585	0.0245543	37.3035	0.554538	0.0148656
ES2i	A	114	0	2	2	43.7266	0.109403	0.00250198	41.7788	0.0482496	0.00115488	37.0453	0.0378447	0.00102158	48.8522	0.109486	0.00224118	43.787	0.0429799	0.000981568	37.7905	0.0241103	0.000637999
ES1d	G	115	4	2	-2	45.4598	3.18996	0.070171	42.3792	3.20056	0.0755218	37.3906	2.78159	0.0743927	50.2614	2.91728	0.0580423	44.4747	2.87011	0.0645334	38.1763	2.86913	0.0751547
	G	116	0	0	0
	A	117	0	0	0
	G	118	0	0	0
	A	119	2	2	0
	A	120	1	1	0
	G	121	0	0	0
	A	122	0	0	0
	A	123	0	0	0
	A	124	1	1	0
	A	125	0	0	0
	G	126	0	0	0
	A	127	0	0	0
	C	128	1	1	0
	A	129	0	0	0
	A	130	0	0	0
	A	131	0	0	0
	A	132	1	1	0
	A	133	0	0	0
	G	134	0	0	0
	A	135	2	2	0
	A	136	0	0	0
	A	137	1	1	0
	A	138	0	0	0

## Sheet: A6_CorInc ratio_mtRNA
Supplementary Table S3. A6 Cor, Inc, and Ratio values: mtRNA libraries.
Notes: See the suplementary table legend for additional details.
						KH2F1-RNAi - 0-4 Day - mtRNA
						X01 - F1-RNAi 0 Day - mtRNA			J74 - F1-RNAi 3 Day - mtRNA			J75 - F1-RNAi 4 Day - mtRNA			X02 - F1-RNAi 0 Day - mtRNA - Bio Rep			J83 - F1-RNAi 3 Day - mtRNA - Bio Rep			J84 - F1-RNAi 4 Day - mtRNA - Bio Rep
			Ts 5' to T-str position			91183 Reads			25837 Reads			28241 Reads			96251 Reads			20556 Reads			36403 Reads
Canonical Editing Site (ES)	sequence	T-stripped	pre-edited	edited	editing events; del = -; ins = +	Correct %	Incorrect %	Ratio	Correct %	Incorrect %	Ratio	Correct %	Incorrect %	Ratio	Correct %	Incorrect %	Ratio	Correct %	Incorrect %	Ratio	Correct %	Incorrect %	Ratio
	A	1
	C	2
	G	3
	G	4
	C	5
	G	6
	G	7
	G	8
	A	9
	A	10
	A	11
	A	12
	C	13
	A	14	0	0	0
ES68i	C	15	0	1	1
	C	16	0	0	0	99.9474	0.0526414	0.000526691	100	0	0	100	0	0	99.9605	0.0394801	0.000394957	100	0	0	100	0	0
	C	17	0	0	0	99.9517	0.0482546	0.000482779	100	0	0	100	0	0	99.9792	0.020779	0.000207833	99.9951	0.00486476	4.865e-05	100	0	0
	A	18	0	0	0	99.8827	0.117346	0.00117484	99.9961	0.00387042	3.87057e-05	100	0	0	99.9294	0.0706486	0.000706986	99.9951	0.00486476	4.865e-05	100	0	0
ES67i	A	19	5	6	1	0.114056	5.31459	46.5962	0.0309633	0.402524	13	0.0601962	0.120392	2	0.0903887	3.30802	36.5977	0.0437828	0.257832	5.88889	0.0412054	0.236244	5.73333
ES66i	G	20	0	2	2	0.917934	3.57961	3.89964	0.00774084	0.205132	26.5	0.00354095	0.0070819	2	0.542332	2.23582	4.12261	0	0.0681066	0	0.00824108	0.0164822	2
ES65i	G	21	0	2	2	3.29667	1.48054	0.449102	0.162558	0.0154817	0.0952381	0.0106229	0.00354095	0.333333	2.05297	0.892458	0.434717	0.0583771	0.0145943	0.25	0.0109881	0.0164822	1.5
	A	22	0	0	0	97.4491	2.55091	0.0261769	99.9187	0.0812788	0.000813449	99.9965	0.00354095	3.54108e-05	98.4426	1.55739	0.0158202	99.9368	0.0632419	0.000632819	99.978	0.0219762	0.00021981
ES64i	G	23	0	1	1	3.60703	1.32261	0.366677	0.158687	0.0425746	0.268293	0.0106229	0	0	2.3127	0.687785	0.297394	0.0729714	0.0291886	0.4	0.0247232	0.00549405	0.222222
ES63i	G	24	0	6	6	2.71103	2.73516	1.0089	0.09289	0.0890196	0.958333	0	0.0141638	0	1.70076	1.67583	0.985339	0.0291886	0.0729714	2.5	0.00274703	0.0192292	7
	A	25	0	0	0	97.9744	2.0256	0.0206748	99.9497	0.0503154	0.000503408	99.9965	0.00354095	3.54108e-05	98.8031	1.19687	0.0121137	99.9416	0.0583771	0.000584112	99.9698	0.0302173	0.000302264
ES62i	A	26	1	8	7	2.26797	4.89455	2.15812	0.0657971	0.479932	7.29412	0	0.0495733	0	1.48362	2.87062	1.93487	0.00486476	0.282156	58	0	0.197786	0
ES61i	A	27	0	4	4	2.31293	4.39117	1.89853	0.0735379	0.243836	3.31579	0	0.0141638	0	1.48778	2.7075	1.81983	0	0.0972952	0	0	0.0357113	0
ES60i	G	28	0	5	5	5.62276	2.02121	0.359469	0.317374	0.0309633	0.097561	0.0070819	0.00354095	0.5	3.42334	1.25401	0.366313	0.0924304	0.0729714	0.789474	0.0384584	0.0247232	0.642857
ES59i	A	29	0	12	12	3.79347	4.3155	1.13761	0.150946	0.232225	1.53846	0.00354095	0.0070819	2	2.34179	2.59218	1.10692	0.0243238	0.165402	6.8	0.00824108	0.0521935	6.33333
ES58i	G	30	0	1	1	7.78654	0.936578	0.120282	0.623137	0.09289	0.149068	0.0956057	0.0247867	0.259259	4.78852	0.601552	0.125624	0.311345	0.0583771	0.1875	0.228003	0.0439524	0.192771
	G	31	0	0	0	96.4533	3.54671	0.0367713	99.6207	0.379301	0.00380745	99.9717	0.0283276	0.000283356	97.7735	2.22647	0.0227717	99.7227	0.277291	0.00278062	99.8846	0.115375	0.00115508
ES57i	G	32	0	1	1	8.45772	1.49699	0.176997	0.584433	0.0193521	0.0331126	0.0283276	0	0	5.20202	0.925705	0.177951	0.267562	0.0486476	0.181818	0.153833	0.00824108	0.0535714
ES56i	G	33	0	6	6	6.00112	5.16982	0.861477	0.197391	0.568952	2.88235	0	0.0283276	0	3.62178	3.42126	0.944636	0.0778362	0.39891	5.125	0.0247232	0.192292	7.77778
ES55i	A	34	0	2	2	11.5745	0.772074	0.0667046	0.855362	0.0387042	0.0452489	0.0389505	0.0070819	0.181818	7.42226	0.471683	0.0635498	0.535124	0.0243238	0.0454545	0.228003	0.0247232	0.108434
ES54i	G	35	0	2	2	9.10915	0.547251	0.0600771	0.510895	0.0193521	0.0378788	0.0141638	0.00354095	0.25	5.61137	0.348048	0.0620256	0.243238	0.019459	0.08	0.10164	0.00824108	0.0810811
	A	36	0	0	0	99.2981	0.701885	0.00706846	99.9613	0.0387042	0.000387192	99.9929	0.0070819	7.0824e-05	99.5075	0.492462	0.004949	99.9562	0.0437828	0.00043802	99.9753	0.0247232	0.000247294
ES53i	A	37	0	3	3	8.73189	3.53684	0.405049	0.495414	0.390912	0.789062	0.0141638	0.0424914	3	5.36826	2.534	0.472034	0.228644	0.330804	1.44681	0.0988929	0.140098	1.41667
ES52i	A	38	0	4	4	10.639	1.59679	0.150088	0.83601	0.0967605	0.115741	0.0318686	0.0212457	0.666667	6.7272	1.12103	0.166641	0.457287	0.0875657	0.191489	0.17581	0.0659286	0.375
ES51i	A	39	0	3	3	10.6884	2.78232	0.260312	0.816658	0.193521	0.236967	0.0283276	0.0212457	0.75	6.75629	1.96465	0.290789	0.452423	0.175131	0.387097	0.164822	0.0961459	0.583333
ES50i	G	40	0	5	5	10.6654	1.84026	0.172545	0.797306	0.205132	0.257282	0.0212457	0.0212457	1	6.77188	1.23531	0.182418	0.428099	0.126484	0.295455	0.151086	0.131857	0.872727
ES49i	G	41	0	1	1	11.4605	1.70097	0.148421	0.959864	0.0967605	0.100806	0.0389505	0.0070819	0.181818	7.39109	1.18336	0.160107	0.569177	0.0827009	0.145299	0.238991	0.0247232	0.103448
ES48i	G	42	0	4	4	10.5897	2.3228	0.219345	0.777954	0.174169	0.223881	0.0283276	0.0070819	0.25	6.77292	1.5605	0.230403	0.418369	0.155672	0.372093	0.148339	0.0521935	0.351852
ES47i	G	43	0	5	5	13.6473	0.686531	0.0503054	1.27724	0.0387042	0.030303	0.0849828	0.0177048	0.208333	8.79991	0.542332	0.0616293	0.778362	0.0632419	0.08125	0.439524	0.0357113	0.08125
ES46i	A	44	0	3	3	13.9324	0.224823	0.0161366	1.28885	0.0270929	0.021021	0.0885238	0.00354095	0.04	9.02328	0.156881	0.0173863	0.802685	0.0291886	0.0363636	0.428536	0.0137351	0.0320513
ES45i	A	45	0	2	2	14.0465	0.49132	0.0349781	1.29272	0.0541859	0.0419162	0.0849828	0.0141638	0.166667	9.12198	0.381295	0.0417995	0.797821	0.0535124	0.0670732	0.417548	0.0302173	0.0723684
ES44i	A	46	0	4	4	13.8666	0.548348	0.0395444	1.25015	0.0619267	0.0495356	0.0849828	0.0070819	0.0833333	8.95263	0.450904	0.0503656	0.739443	0.0827009	0.111842	0.37909	0.0329643	0.0869565
	G	47	1	1	0	99.1018	0.898194	0.00906334	99.7291	0.270929	0.00271665	99.8619	0.138097	0.00138288	99.2603	0.739733	0.00745245	99.4746	0.525394	0.00528169	99.5385	0.4615	0.0046364
ES43i	G	48	0	1	1	14.1134	0.342169	0.0242443	1.27337	0.0193521	0.0151976	0.0779009	0.00354095	0.0454545	9.14276	0.304412	0.0332955	0.729714	0.0486476	0.0666667	0.348872	0.0219762	0.0629921
ES42i	A	49	0	5	5	14.0892	0.786331	0.0558107	1.24627	0.18578	0.149068	0.070819	0.0779009	1.1	9.09601	0.687785	0.0756139	0.719984	0.335668	0.466216	0.329643	0.269209	0.816667
ES41i	A	50	0	1	1	14.7527	0.332299	0.0225245	1.44754	0.0154817	0.0106952	0.177048	0.0070819	0.04	9.69444	0.260777	0.0268996	1.06538	0.0535124	0.0502283	0.587864	0.0219762	0.0373832
ES40i	G	51	2	3	1	14.7209	0.854326	0.0580347	1.45141	0.139335	0.096	0.205375	0.0354095	0.172414	9.62484	0.703369	0.0730786	1.17727	0.20432	0.173554	0.733456	0.118122	0.161049
ES39i	G	52	0	2	2	14.9951	0.618536	0.0412492	1.48237	0.0851492	0.0574413	0.208916	0.0283276	0.135593	9.86172	0.509086	0.0516224	1.21619	0.126484	0.104	0.741697	0.0906519	0.122222
	G	53	0	0	0	99.4209	0.579055	0.00582428	99.9497	0.0503154	0.000503408	99.9965	0.00354095	3.54108e-05	99.5169	0.483112	0.00485457	99.9319	0.0681066	0.000681531	99.9451	0.0549405	0.000549707
	A	54	0	0	0	99.3124	0.687628	0.00692389	99.9187	0.0812788	0.000813449	99.9752	0.0247867	0.000247928	99.4608	0.539215	0.00542138	99.8395	0.160537	0.00160795	99.9258	0.0741697	0.000742248
ES38i	A	55	0	3	3	14.7659	0.277464	0.0187908	1.46689	0.0387042	0.0263852	0.194752	0.0177048	0.0909091	9.66743	0.234803	0.024288	1.19187	0.0437828	0.0367347	0.736203	0.0357113	0.0485075
ES37i	G	56	2	3	1	15.2452	0.823618	0.0540249	1.50559	0.131594	0.0874036	0.215998	0.0424914	0.196721	10.0415	0.690902	0.068805	1.25024	0.223779	0.178988	0.780155	0.12911	0.165493
	C	57	0	0	0	99.3859	0.61415	0.00617945	99.8994	0.100631	0.00100732	99.9681	0.0318686	0.000318787	99.5148	0.48519	0.00487555	99.8054	0.19459	0.0019497	99.9286	0.0714227	0.000714737
	C	58	0	0	0	99.9803	0.0197405	0.000197444	99.9961	0.00387042	3.87057e-05	100	0	0	99.9823	0.0176622	0.000176653	100	0	0	100	0	0
ES36d	G	59	3	0	-3	15.6696	1.36539	0.0871361	1.64106	0.212873	0.129717	0.269112	0.0920647	0.342105	10.4196	1.19583	0.114767	1.52267	0.374586	0.246006	0.851578	0.219762	0.258065
	C	60	0	0	0	99.2915	0.708465	0.0071352	99.8878	0.112242	0.00112368	99.9327	0.0672781	0.000673234	99.4234	0.576617	0.00579962	99.713	0.287021	0.00287847	99.8736	0.126363	0.00126523
	C	61	0	0	0	99.9583	0.0416744	0.000416918	99.9961	0.00387042	3.87057e-05	100	0	0	99.9668	0.0332464	0.000332575	99.9951	0.00486476	4.865e-05	99.9973	0.00274703	2.7471e-05
	A	62	0	0	0	99.8947	0.105283	0.00105394	99.9536	0.046445	0.000464666	99.9858	0.0141638	0.000141658	99.9242	0.0758434	0.000759009	99.9124	0.0875657	0.000876424	99.9588	0.0412054	0.000412224
ES35i	A	63	0	1	1	14.0585	0.7633	0.0542944	1.44754	0.0967605	0.0668449	0.240785	0.0283276	0.117647	9.52406	0.700252	0.0735246	1.37673	0.136213	0.0989399	0.716974	0.0576876	0.0804598
ES34i	A	64	0	2	2	11.1764	5.44729	0.487391	0.781825	1.165	1.4901	0.123933	0.237244	1.91429	7.50849	3.90126	0.519579	0.792956	1.36213	1.71779	0.398319	0.607093	1.52414
	C	65	0	0	0	94.4299	5.57012	0.0589868	98.9937	1.00631	0.0101654	99.8477	0.152261	0.00152493	96.1964	3.8036	0.0395399	99.1584	0.841603	0.00848747	99.4671	0.532923	0.00535778
ES33d	A	66	4	0	-4	19.5025	2.0925	0.107293	4.88447	0.352208	0.0721078	1.643	0.22308	0.135776	13.5012	1.54388	0.114352	6.43608	0.50107	0.0778534	3.34038	0.324149	0.0970395
	G	67	0	0	0	98.8211	1.17895	0.0119301	99.702	0.298022	0.00298913	99.8867	0.11331	0.00113439	99.0421	0.957912	0.00967177	99.5233	0.476746	0.0047903	99.7473	0.252726	0.00253367
ES32i	A	68	0	2	2	20.7067	1.14166	0.0551348	4.59806	0.18578	0.040404	1.3491	0.0566552	0.0419948	14.4549	0.891419	0.0616689	5.74042	0.325939	0.0567797	2.77175	0.123616	0.0445986
ES31i	A	69	0	3	3	17.4111	2.33267	0.133976	1.91973	0.534118	0.278226	0.276194	0.233703	0.846154	11.8596	1.74232	0.146912	1.88753	0.836739	0.443299	0.961459	0.420295	0.437143
ES30i	G	70	0	6	6	16.8047	6.10311	0.36318	1.91199	3.18535	1.66599	0.286817	1.27828	4.45679	11.3526	4.75424	0.418779	1.85347	4.67017	2.51969	0.931242	2.23883	2.40413
ES29i	A	71	0	1	1	19.0935	4.99764	0.261746	2.4074	2.90281	1.20579	0.488651	1.1154	2.28261	13.0544	3.89606	0.298448	2.57832	4.24207	1.64528	1.36253	1.92017	1.40927
	A	72	0	0	0	94.4463	5.55367	0.0588024	96.9617	3.03828	0.0313348	98.7996	1.20038	0.0121497	95.705	4.29502	0.0448777	95.5098	4.49017	0.0470127	98.0194	1.98061	0.0202063
ES28i	A	73	0	1	1	19.9324	4.19486	0.210454	2.62801	2.74413	1.04418	0.584257	1.07999	1.84848	13.7682	3.30074	0.239737	2.82156	4.06694	1.44138	1.52735	1.83776	1.20324
ES27i	G	74	0	1	1	23.0164	1.49151	0.064802	5.13217	0.445098	0.086727	1.63238	0.208916	0.127983	16.2274	1.21453	0.0748447	6.66472	0.622689	0.0934307	3.1893	0.357113	0.111972
	A	75	0	0	0	96.4972	3.50285	0.0363	98.8389	1.16113	0.0117477	99.221	0.779009	0.00785125	97.2655	2.73452	0.028114	98.3314	1.66861	0.0169693	98.7968	1.2032	0.0121785
ES26i	G	76	0	4	4	22.4537	3.30763	0.147309	4.84576	1.17274	0.242013	1.40576	0.825042	0.586902	15.8284	2.7075	0.171053	6.04203	1.67348	0.276973	2.81021	1.12628	0.400782
	C	77	0	0	0	96.4851	3.51491	0.0364296	99.2453	0.754732	0.00760471	99.5928	0.407209	0.00408874	97.2946	2.70543	0.0278066	98.9443	1.05565	0.0106692	99.4066	0.593358	0.00596899
	A	78	0	0	0	99.1018	0.898194	0.00906334	99.9071	0.09289	0.000929764	99.961	0.0389505	0.000389656	99.2769	0.723109	0.00728376	99.893	0.107025	0.00107139	99.9011	0.0988929	0.000989908
	G	79	0	0	0	91.7232	8.27676	0.0902363	97.7629	2.2371	0.0228829	98.2154	1.78464	0.0181707	93.0567	6.9433	0.0746137	96.5168	3.48317	0.0360887	97.6925	2.3075	0.0236201
ES25i	G	80	0	2	2	22.9462	3.13984	0.136835	3.40597	0.735379	0.215909	0.832124	0.52052	0.625532	16.3032	2.54854	0.156322	4.01343	1.25511	0.312727	1.85424	0.890037	0.48
	A	81	0	0	0	82.6349	17.3651	0.210142	86.1013	13.8987	0.161422	85.6414	14.3586	0.167659	84.7441	15.2559	0.180024	81.0177	18.9823	0.234298	83.7541	16.2459	0.193972
ES24i	A	82	0	1	1	38.1518	1.76787	0.0463378	15.9655	0.363819	0.0227879	13.6362	0.251408	0.0184368	29.9155	1.35479	0.0452872	20.9185	0.525394	0.0251163	16.1635	0.409307	0.0253229
	A	83	0	0	0	95.7328	4.26724	0.0445745	98.835	1.165	0.0117873	98.8492	1.15081	0.0116421	96.6473	3.35269	0.03469	98.2487	1.75131	0.0178253	98.2474	1.7526	0.0178387
ES23i	G	84	0	1	1	36.3917	4.18718	0.115059	13.3259	2.10164	0.157711	10.7503	2.37244	0.220685	28.5545	3.42022	0.119779	17.4061	3.26912	0.187814	12.7325	3.38708	0.266019
	G	85	0	0	0	94.3268	5.67321	0.0601442	91.4773	8.52266	0.0931669	85.5317	14.4683	0.169158	95.4962	4.50385	0.0471626	88.2565	11.7435	0.133061	83.3997	16.6003	0.199045
ES22d	A	86	2	0	-2	39.5238	6.70629	0.169677	24.2985	3.9517	0.162631	28.8304	4.43681	0.153893	31.0615	5.7828	0.186173	31.8593	5.32205	0.167048	33.9807	5.78249	0.17017
ES21i	G	87	0	6	6	37.4894	9.44694	0.251989	20.5364	4.31552	0.210139	24.3582	4.45098	0.18273	29.501	7.89706	0.267688	27.7924	6.33878	0.228076	27.6296	6.30717	0.228276
ES20i	G	88	0	2	2	39.3834	7.07259	0.179583	21.2215	3.48338	0.164144	24.8646	3.68967	0.148391	31.0937	5.90955	0.190056	28.7507	5.18583	0.180372	28.2696	5.28803	0.187057
ES19i	G	89	0	5	5	38.9524	7.60339	0.195197	20.7416	4.40454	0.212353	24.3015	4.70946	0.193793	30.7623	6.38643	0.207606	28.2302	6.11987	0.216784	27.3549	6.99118	0.255573
ES18i	G	90	0	2	2	40.3255	5.06783	0.125673	21.477	2.98796	0.139124	24.8681	3.39931	0.136694	31.9051	4.27528	0.134	29.174	4.04748	0.138736	28.2147	4.77708	0.169312
ES17i	G	91	0	3	3	43.3941	6.0077	0.138445	24.074	3.60723	0.149839	26.7448	4.14645	0.155038	34.4589	5.00255	0.145174	31.9323	4.85503	0.152041	30.8354	5.47208	0.177461
ES16i	A	92	0	3	3	45.1729	4.91868	0.108886	24.5849	4.64837	0.189074	28.2355	3.67197	0.130048	36.0381	4.07372	0.113039	33.562	5.24421	0.156255	33.3599	5.48581	0.164443
	G	93	0	0	0	94.2643	5.73572	0.0608472	95.1504	4.84963	0.0509681	96.5122	3.48784	0.0361388	95.3278	4.67216	0.0490115	94.532	5.46799	0.0578427	94.8081	5.19188	0.054762
ES15i	G	94	0	4	4	45.0347	4.04571	0.0898354	24.2211	3.55691	0.146852	28.1222	2.18477	0.0776882	35.9321	3.33087	0.0926991	33.202	3.77019	0.113553	33.033	3.37884	0.102287
ES14i	A	95	0	1	1	49.8108	1.02322	0.0205421	27.418	0.894067	0.0326087	29.8927	0.566552	0.0189529	39.8261	0.936094	0.0235046	36.617	0.885386	0.0241796	35.7718	0.76642	0.0214253
ES13i	G	96	0	4	4	45.3528	5.62715	0.124075	24.314	3.64593	0.149952	28.1116	2.00064	0.0711677	36.2033	4.69086	0.12957	33.2409	4.10586	0.123518	33.0715	3.18655	0.0963535
	A	97	0	0	0	97.8263	2.17365	0.0222195	98.3628	1.63719	0.0166444	98.966	1.03396	0.0104476	97.9595	2.0405	0.02083	98.5746	1.42537	0.0144599	98.5963	1.40373	0.0142372
ES12i	G	98	0	3	3	45.6467	1.80297	0.0394983	24.314	1.14564	0.0471188	28.0727	0.672781	0.0239657	36.2895	1.547	0.0426293	33.1679	1.05079	0.0316808	32.9781	0.997171	0.0302374
	A	99	0	0	0	98.1959	1.80406	0.0183721	98.9937	1.00631	0.0101654	99.3343	0.665699	0.0067016	98.4738	1.52622	0.0154987	98.993	1.00701	0.0101725	98.9424	1.05761	0.0106891
	A	100	0	0	0	95.0682	4.93184	0.0518769	97.6777	2.32225	0.0237746	98.9483	1.05166	0.0106284	95.9273	4.07268	0.0424559	97.6455	2.35454	0.0241132	98.2282	1.77183	0.0180379
	G	101	0	0	0	91.686	8.31405	0.0906796	85.9736	14.0264	0.163148	83.4638	16.5362	0.198125	92.8209	7.17915	0.0773441	89.7548	10.2452	0.114146	80.9906	19.0094	0.234712
ES11i	A	102	0	2	2	46.7269	8.23289	0.176192	25.7151	21.3763	0.831276	29.574	27.846	0.941571	37.2329	7.20304	0.193459	34.389	14.8083	0.430613	34.7581	30.7859	0.885719
ES10i	A	103	0	2	2	47.1129	9.41184	0.199772	25.7344	21.8485	0.849	29.5917	28.2178	0.953572	37.691	8.14225	0.216026	34.3793	15.4359	0.448988	34.6345	31.4425	0.907836
ES9i	A	104	0	1	1	48.86	1.5255	0.0312219	27.6193	0.719898	0.026065	30.8736	0.495733	0.0160569	39.4022	1.27064	0.0322479	35.8922	0.734579	0.0204663	36.4393	0.620828	0.0170373
ES8i	G	105	0	2	2	55.4391	2.32061	0.0418587	47.3739	1.69911	0.035866	57.6786	1.00563	0.0174351	45.0676	2.01972	0.0448153	49.0854	1.56159	0.0318137	65.5138	1.56031	0.0238165
ES7i	G	106	0	2	2	48.9664	9.6575	0.197227	26.5433	23.0406	0.868037	30.0839	28.88	0.959981	39.584	8.6129	0.217585	34.9825	15.9905	0.457099	35.1564	32.2281	0.916706
ES6i	G	107	0	1	1	48.0934	11.5921	0.241033	26.2492	24.074	0.917134	29.8856	29.5563	0.988981	39.05	10.2773	0.263183	34.7587	16.8272	0.484115	34.9147	32.8572	0.94107
	A	108	0	0	0	88.1678	11.8322	0.134202	75.7867	24.2133	0.319493	70.2914	29.7086	0.422649	89.3611	10.6389	0.119055	82.9685	17.0315	0.205277	67.0604	32.9396	0.491193
	A	109	0	0	0	87.7532	12.2468	0.13956	74.4359	25.5641	0.343438	69.4203	30.5797	0.4405	88.7295	11.2705	0.127021	81.5869	18.4131	0.225687	66.283	33.717	0.508682
	A	110	0	0	0	99.4835	0.516544	0.00519226	99.4117	0.588304	0.00591785	99.306	0.694026	0.00698877	99.5283	0.471683	0.00473919	99.3189	0.681066	0.00685737	99.4094	0.590611	0.0059412
ES5i	G	111	0	2	2	48.1778	0.309268	0.0064193	26.2569	0.27867	0.0106132	29.7936	0.279735	0.00938911	39.078	0.272205	0.00696568	34.7295	0.248103	0.00714386	34.8076	0.288438	0.00828664
ES4d	G	112	2	0	-2	50.7342	1.19211	0.0234971	27.7432	0.83601	0.0301339	30.6398	0.761304	0.0248469	41.9757	1.32674	0.0316073	35.9895	0.885386	0.0246012	35.6207	0.703239	0.0197424
ES3i	G	113	1	4	3	51.2837	1.51563	0.0295539	27.9831	0.777954	0.0278008	30.7957	0.7436	0.0241463	42.6738	1.39323	0.0326484	36.2279	0.836739	0.0230965	35.6921	0.634563	0.0177788
ES2i	A	114	0	2	2	53.2128	0.0690918	0.00129841	29.0668	0.046445	0.00159787	31.6738	0.0495733	0.00156512	44.6821	0.0592202	0.00132537	37.2787	0.0729714	0.00195746	36.4695	0.0329643	0.000903887
ES1d	G	115	4	2	-2	54.1373	2.1232	0.0392189	29.7248	2.62414	0.0882813	32.2793	2.39722	0.074265	45.7034	2.20257	0.0481928	38.0327	2.09671	0.0551292	37.0849	2.07675	0.056
	G	116	0	0	0
	A	117	0	0	0
	G	118	0	0	0
	A	119	2	2	0
	A	120	1	1	0
	G	121	0	0	0
	A	122	0	0	0
	A	123	0	0	0
	A	124	1	1	0
	A	125	0	0	0
	G	126	0	0	0
	A	127	0	0	0
	C	128	1	1	0
	A	129	0	0	0
	A	130	0	0	0
	A	131	0	0	0
	A	132	1	1	0
	A	133	0	0	0
	G	134	0	0	0
	A	135	2	2	0
	A	136	0	0	0
	A	137	1	1	0
	A	138	0	0	0
