# Supplementary material
Source: HighWire-hosted journal article supplement (doi:10.1101/rna.076513.120)
Supplement: Supplemental_Table_S4.xlsx [file Supplemental_Table_S4.xlsx]

## Sheet: RPS12_RESC_Fold change_IPS 
Supplementatry Table S4. Inc/Cor fold change values in the RPS12 ORF sequence in RESC6-IPs.
Notes: See the suplementary table legend for additional details.
			Ts 5' to T-str position					RESC6-IP
Canonical Editing Site (ES)	Sequence	T-stripped Position	pre-edited	edited	editing events: Ins (+), Del (-)	INC/COR Ratio (J07/J16)	FOLD CHANGE	SD (J07/J16 )	IPS (Read Lab) *
	C	1
	A	2
	A	3
	A	4
	C	5
	A	6
	C	7
	G	8
	A	9
	A	10
	A	11
	C	12
	A	13
	A	14
	A	15
	C	16	0	0	0
	A	17	1	1	0	0.00574061	6.50955	0.000553759
	A	18	0	0	0	0.000881875	0.35831	0.000231362
	A	19	0	0	0	0.00246121	0.698064	0.000466336
	G	20	0	0	0	0.00352576	0.0151325	0.000836934
	A	21	1	1	0	0.232993	1.19111	0.0433753
	A	22	0	0	0	0.195609	1.59393	0.0319213		5' UTR
ES76i	A	23	0	1	1	0.122721	0.305061	0.0230878		B-form
	A	24	0	0	0	0.402285	0.127838	0.0243948
	A	25	0	0	0	3.14684	1.39817	0.330954
ES75i	G	26	0	4	4	2.25069	1.87544	0.00725087
ES74i	G	27	0	8	8	1.20009	122.146	0.061067
	C	28	0	0	0	0.00982502	4.57683	0.00138448
	G	29	0	0	0	0.00214669	0.0833525	0.000396513
ES73i	A	30	0	1	1	0.0257543	0.886837	0.000235956
ES72i	G	31	0	1	1	0.0290406	0.925456	0.000632958		START CODON
ES71i	G	32	0	1	1	0.0313798	1.63458	0.001785				KEY: Inc/Cor value. Frequency within the ORF
	A	33	0	0	0	0.0191975	0.127895	0.00267674						INC/COR
ES70d	G	34	6	5	-1	0.150104	7.89628	0.012465
ES69i	A	35	0	1	1	0.0190095	0.880453	0.00131574	IPS129
ES68i	G	36	0	1	1	0.0215906	0.774535	0.00224204
ES67d	G	37	1	0	-1	0.0278755	1.20135	0.0022345
ES66i	G	38	0	2	2	0.0232035	0.60994	0.00305603
ES65i	G	39	0	2	2	0.0380422	0.850446	0.00102797
ES64i	A	40	0	3	3	0.044732	4.75763	0.00247321
	C	41	0	0	0	0.00940216	4.87542	7.24292e-05
ES63d	G	42	1	0	-1	0.00192848	0.0341406	0.000286745
ES62i	G	43	0	4	4	0.0564865	1.04774	0.00726724
ES61i	A	44	0	4	4	0.0539129	1.29502	0.00448994
ES60i	G	45	0	3	3	0.0416311	0.496342	0.0035837				Low	IPS frequency (Read lab) *
ES59i	A	46	0	4	4	0.0838759	0.977069	0.00765823				Medium
ES58i	G	47	0	1	1	0.0858444	1.02861	0.00789338				High
ES57i	A	48	0	2	2	0.0834567	12.8777	0.00780773
ES56i	A	49	0	2	2	0.00648071	0.442788	0.000555048
ES55i	A	50	0	1	1	0.0146362	0.426297	9.11207e-05
ES54i	G	51	0	1	1	0.0343332	4.96712	0.0017867
	A	52	0	0	0	0.00691209	3.48362	0.000862382
	G	53	0	0	0	0.00198417	1.23594	0.000173899
ES53i	C	54	0	1	1	0.0016054	5.27121	0.000267702
	C	55	0	0	0	0.000304559	0.00547195	6.125e-05
	G	56	0	0	0	0.0556582	5.5269	0.00771477
ES52d	C	57	2	0	-2	0.0100704	14.8337	0.00157184	IPS107
	G	58	0	0	0	0.000678888	0.22005	5.29974e-05
	A	59	0	0	0	0.00308516	0.0731669	0.000192042
ES51i	G	60	0	2	2	0.042166	15.4987	0.00221319
	C	61	0	0	0	0.00272062	37.5536	0.000276831
	C	62	0	0	0	7.24465e-05	0.0367355	3.18143e-05
	C	63	0	0	0	0.00197211	0.494602	0.000221939
	A	64	0	0	0	0.00398727	0.476908	0.000235231
	G	65	0	0	0	0.00836068	0.514015	0.000162518
ES50i	C	66	0	2	2	0.0162654	0.30359	0.00150164
	C	67	0	0	0	0.0535769	1.03015	0.00732629
	G	68	0	0	0	0.052009	1.14564	0.00780024
	G	69	0	0	0	0.0453973	1.49845	0.00241229	IPS95
ES49i	A	70	0	1	1	0.0302963	0.73273	0.00642594
	A	71	0	0	0	0.0413471	4.17098	0.00272872
	C	72	0	0	0	0.00991304	2.2865	0.000479853
	C	73	0	0	0	0.00433547	1.02996	0.000112967
	G	74	0	0	0	0.00420937	0.217394	0.000293561
	A	75	0	0	0	0.0193629	1.29093	0.000527705
	C	76	0	0	0	0.0149991	6.60121	0.000724511
	G	77	0	0	0	0.00227218	0.052445	8.31996e-06
ES48i	G	78	0	1	1	0.0433251	0.416643	0.0034406
ES47i	A	79	0	1	1	0.103986	0.680451	0.0185463
ES46i	G	80	0	2	2	0.152819	4.10121	0.0240867
ES45i	A	81	0	1	1	0.037262	0.497961	0.00452856
ES44i	G	82	0	1	1	0.0748292	3.2292	0.00450089	IPS82
	C	83	0	0	0	0.0231727	0.564572	0.00151612
ES43d	C	84	2	0	-2	0.0410447	1.04649	0.00304857
ES42d	G	85	4	0	-4	0.0392213	0.329271	0.0051891
ES41i	A	86	0	1	1	0.119116	0.576331	0.0144701
ES40i	A	87	0	4	4	0.206679	0.844672	0.0238857
ES39i	A	88	1	3	2	0.244686	1.10482	0.0383015
ES38i	A	89	0	1	1	0.221471	1.23587	0.0301059
ES37i	A	90	0	1	1	0.179202	1.42212	0.0201856
	A	91	0	0	0	0.126011	0.29172	0.00536741
ES36i	G	92	0	4	4	0.431958	1.5872	0.0736249
ES35i	G	93	0	3	3	0.272151	2.66721	0.0405758
	G	94	0	0	0	0.102036	0.836546	0.00149281
	A	95	0	0	0	0.121973	0.719743	0.00515671
ES34i	G	96	0	1	1	0.169467	0.532216	0.0238408	IPS68
ES33i	G	97	0	2	2	0.318418	1.84357	0.031489	IPS67
	C	98	0	0	0	0.172719	1.4799	0.0186843	IPS66
	G	99	0	0	0	0.11671	0.244574	0.0127471
ES32i	G	100	0	2	2	0.477197	0.732883	0.0796873
ES31i	G	101	0	8	8	0.651123	5.49747	0.112269
ES30i	G	102	0	2	2	0.118441	0.527027	0.010286	IPS62
ES29i	A	103	0	4	4	0.224733	0.637867	0.0351192
ES28i	G	104	0	2	2	0.35232	2.1466	0.0684378
	G	105	0	0	0	0.164129	1.17215	0.0198233
ES27i	A	106	0	3	3	0.140024	0.741164	0.0215512
	G	107	0	0	0	0.188925	1.24891	0.0232503
ES26i	A	108	0	2	2	0.151272	1.48256	0.0259744
ES25i	G	109	0	1	1	0.102034	0.704718	0.0117304	IPS55
ES24d	C	110	3	1	-2	0.144787	18.8433	0.0173434
	A	111	0	0	0	0.00768377	0.0553165	0.000508918
ES23i	A	112	0	2	2	0.138906	0.849829	0.0123649
Es22i	A	113	0	3	3	0.163451	1.00428	0.0168977
Es21i	A	114	0	2	2	0.162755	0.846257	0.0133566
ES20i	A	115	0	1	1	0.192323	0.958333	0.0113834
	G	116	0	0	0	0.200685	1.26559	0.0171281
	A	117	0	0	0	0.15857	0.795825	0.0132625	IPS47
ES19d	G	118	3	0	-3	0.199252	1.07055	0.0183266
	G	119	0	0	0	0.186122	1.05757	0.0182238
	G	120	0	0	0	0.17599	0.729788	0.0137998
	G	121	1	1	0	0.241153	1.1113	0.0255484
	G	122	0	0	0	0.217001	3.59887	0.0157567
ES18i	G	123	0	1	1	0.0602969	0.290098	0.00594398
	G	124	0	0	0	0.20785	0.662849	0.0180299
ES17i	G	125	0	4	4	0.313571	7.72165	0.0401288	IPS39
ES16i	G	126	0	2	2	0.0406093	0.155513	0.00308408	IPS38
	A	127	0	0	0	0.261132	1.28886	0.0261737
ES15i	A	128	0	3	3	0.202607	2.84385	0.0237202
	C	129	0	0	0	0.071244	3.13876	0.000365484	IPS35
	C	130	0	0	0	0.0226981	2.33825	0.00335767
	C	131	0	0	0	0.00970732	0.103543	0.000554563
ES14d	G	132	3	0	-3	0.0937512	0.683041	0.00764204	IPS32
ES13d	G	133	4	0	-4	0.137256	0.400618	0.0131793
ES12i	G	134	0	1	1	0.34261	1.06375	0.0322781
ES11d	A	135	2	1	-1	0.322077	0.601474	0.0258641
	A	136	0	0	0	0.53548	1.99679	0.0338625
	A	137	0	0	0	0.268171	1.02499	0.0241367
	G	138	0	0	0	0.261634	88.7459	0.0223142	IPS26
ES10i	A	139	0	1	1	0.00294812	0.0135069	3.06598e-05
ES9i	A	140	0	2	2	0.218268	0.732747	0.00172398
ES8i	A	141	0	1	1	0.297876	0.488691	0.00255307
	C	142	0	0	0	0.609538	566.194	0.0356487
	A	143	0	0	0	0.00107655	1.04809	0.000141176	IPS21
ES7d	C	144	1	0	-1	0.00102716	0.419801	0.000216028
	G	145	0	0	0	0.00244678	0.00707954	0.000166278
ES6d	A	146	3	1	-2	0.345613	66.9831	0.0262176
ES5i	G	147	0	2	2	0.0051597	10.5505	0.00077735	IPS17
ES4i	A	148	0	1	1	0.000489049	0.705352	0.000143133
	A	149	0	0	0	0.00069334	1.0814	2.14272e-06
	G	150	0	0	0	0.000641148	0.751798	5.00493e-05
ES3i	A	151	0	2	2	0.00085282		0.000107385		STOP CODON
	G	152	0	0	0
	A	153	0	0	0
ES2d	A	154	4	3	-1
	G	155	0	0	0
	A	156	0	0	0
ES1i	A	157	0	1	1
	A	158	1	1	0
	A	159	0	0	0
	G	160	0	0	0
	A	161	0	0	0
	A	162	1	1	0
	G	163	1	1	0

## Sheet: A6_RESC_Fold change
Supplementatry Table S4. Inc/Cor fold change values in a 3' fragment of A6 sequence in RESC6-IPs.
Notes: See the suplementary table legend for additional details.
			Ts 5' to T-str position					RESC6-IP
Canonical Editing Site (ES)	sequence	T-stripped	pre-edited	edited	editing events; del = -; ins = +	INC/COR Ratio (J79/J88)	FOLD CHANGE	SD (J79/J88)
	A	1
	C	2
	G	3
	G	4
	C	5
	G	6
	G	7
	G	8
	A	9
	A	10
	A	11
	A	12
	C	13
	A	14	0	0	0
ES68i	C	15	0	1	1
	C	16	0	0	0	0.000132847	2.07209	0.000137925
	C	17	0	0	0	6.41126e-05	0.376901	9.23315e-06
	A	18	0	0	0	0.000170105	1.56834e-05	0.000159129
ES67i	A	19	5	6	1	10.8462	4.27641	4.02507
ES66i	G	20	0	2	2	2.53627	6.17044	1.17435
ES65i	G	21	0	2	2	0.411036	181.177	0.00796291			KEY:
	A	22	0	0	0	0.00226869	0.00611218	0.000597811			INC/COR
ES64i	G	23	0	1	1	0.371176	0.335456	0.161982
ES63i	G	24	0	6	6	1.10648	612.159	0.268439
	A	25	0	0	0	0.00180751	0.000886475	5.44059e-05
ES62i	A	26	1	8	7	2.03898	1.41144	0.380015
ES61i	A	27	0	4	4	1.44461	2.91333	0.151479
ES60i	G	28	0	5	5	0.495862	0.301256	0.0790009
ES59i	A	29	0	12	12	1.64598	11.6682	0.339032
ES58i	G	30	0	1	1	0.141066	37.3676	0.0280774
	G	31	0	0	0	0.00377509	0.0131345	2.58755e-05
ES57i	G	32	0	1	1	0.287418	0.228392	0.140967
ES56i	G	33	0	6	6	1.25844	12.6833	0.30794
ES55i	A	34	0	2	2	0.0992209	1.03452	0.0541348
ES54i	G	35	0	2	2	0.0959103	124.575	0.0460044
	A	36	0	0	0	0.0007699	0.00142322	0.000110954
ES53i	A	37	0	3	3	0.540958	2.60426	0.222251
ES52i	A	38	0	4	4	0.20772	0.57582	0.0826843
ES51i	A	39	0	3	3	0.360738	1.24374	0.160816
ES50i	G	40	0	5	5	0.290043	1.52065	0.157645
ES49i	G	41	0	1	1	0.190737	0.555734	0.0545359
ES48i	G	42	0	4	4	0.343216	4.24597	0.147849
ES47i	G	43	0	5	5	0.0808333	2.62038	0.0200347
ES46i	A	44	0	3	3	0.0308479	0.316197	0.00263381
ES45i	A	45	0	2	2	0.0975591	1.26678	0.0505924
ES44i	A	46	0	4	4	0.0770136	35.3176	0.0228023
	G	47	1	1	0	0.0021806	0.0448082	0.000180931
ES43i	G	48	0	1	1	0.0486652	0.428931	0.02413
ES42i	A	49	0	5	5	0.113457	2.98632	0.0222451
ES41i	A	50	0	1	1	0.0379922	0.259635	0.0158224
ES40i	G	51	2	3	1	0.146329	1.47361	0.0181791
ES39i	G	52	0	2	2	0.0992995	91.5631	0.0108844
	G	53	0	0	0	0.00108449	0.609742	6.64241e-05
	A	54	0	0	0	0.00177861	0.0437363	1.35422e-05
ES38i	A	55	0	3	3	0.0406667	0.448273	0.0103709
ES37i	G	56	2	3	1	0.0907185	74.1067	0.000738783
	C	57	0	0	0	0.00122416	42.5175	1.91016e-05
	C	58	0	0	0	2.87919e-05	0.000166418	4.07179e-05
ES36d	G	59	3	0	-3	0.17301	102.934	0.0142675
	C	60	0	0	0	0.00168079	22.337	0.000174928
	C	61	0	0	0	7.52468e-05	0.442356	5.64658e-05
	A	62	0	0	0	0.000170105	0.00204873	0.000159129
ES35i	A	63	0	1	1	0.0830295	0.115886	0.00260408
ES34i	A	64	0	2	2	0.716478	88.3648	0.00310021
	C	65	0	0	0	0.00810819	0.04809	0.00113141
ES33d	A	66	4	0	-4	0.168604	62.8138	0.030619
	G	67	0	0	0	0.00268419	0.0406815	0.000613062
ES32i	A	68	0	2	2	0.0659806	0.322292	0.0145812
ES31i	A	69	0	3	3	0.204723	0.35607	0.0108083
ES30i	G	70	0	6	6	0.574951	1.86209	0.000941562
ES29i	A	71	0	1	1	0.308766	31.7446	0.0286208
	A	72	0	0	0	0.00972658	0.0387453	0.000522385
ES28i	A	73	0	1	1	0.251039	2.82238	6.09775e-05
ES27i	G	74	0	1	1	0.0889459	8.67025	0.00793734
	A	75	0	0	0	0.0102587	0.0312431	0.00334601
ES26i	G	76	0	4	4	0.328353	29.486	0.0645426
	C	77	0	0	0	0.0111359	3.79664	0.00251542
	A	78	0	0	0	0.00293309	0.0918267	0.000965052
	G	79	0	0	0	0.0319416	0.1143	0.00875396
ES25i	G	80	0	2	2	0.279454	3.65915	0.0696338
	A	81	0	0	0	0.0763714	1.03219	0.0195793
ES24i	A	82	0	1	1	0.07399	3.34693	0.00181739
	A	83	0	0	0	0.0221068	0.0971353	0.00632073
ES23i	G	84	0	1	1	0.227588	7.19624	0.0243789
	G	85	0	0	0	0.031626	0.0955065	0.0083933
ES22d	A	86	2	0	-2	0.331139	0.635278	0.036823
ES21i	G	87	0	6	6	0.521251	1.61931	0.0709611
ES20i	G	88	0	2	2	0.321897	0.886715	0.0314371
ES19i	G	89	0	5	5	0.363023	1.60936	0.0234917
ES18i	G	90	0	2	2	0.225569	0.904937	0.0143842
ES17i	G	91	0	3	3	0.249265	1.78222	0.00727147
ES16i	A	92	0	3	3	0.139862	4.52857	0.0154983
	G	93	0	0	0	0.0308844	0.251851	0.00922691
ES15i	G	94	0	4	4	0.12263	4.57041	0.0103645
ES14i	A	95	0	1	1	0.0268312	0.169958	0.00339662
ES13i	G	96	0	4	4	0.15787	9.78691	0.0184205
	A	97	0	0	0	0.0161307	0.24424	0.00198954
ES12i	G	98	0	3	3	0.0660445	6.17533	0.00617793
	A	99	0	0	0	0.0106949	0.401231	0.00354912
	A	100	0	0	0	0.0266552	0.455137	0.00937203
	G	101	0	0	0	0.0585653	0.214319	0.0156956
ES11i	A	102	0	2	2	0.273263	0.901416	0.010668
ES10i	A	103	0	2	2	0.303148	4.52028	0.0133218
ES9i	A	104	0	1	1	0.067064	0.695725	0.00705547
ES8i	G	105	0	2	2	0.0963944	0.392215	0.00503557
ES7i	G	106	0	2	2	0.245769	0.644569	0.0124516
ES6i	G	107	0	1	1	0.381292	2.90279	0.0256552
	A	108	0	0	0	0.131354	0.776805	0.0166436
	A	109	0	0	0	0.169095	25.155	0.0110464
	A	110	0	0	0	0.00672212	0.540286	3.0037e-06
ES5i	G	111	0	2	2	0.0124418	0.197251	0.00134357
ES4d	G	112	2	0	-2	0.0630758	1.03586	0.00815958
ES3i	G	113	1	4	3	0.060892	25.6757	0.00529573
ES2i	A	114	0	2	2	0.00237158	0.0369943	0.00018441
ES1d	G	115	4	2	-2	0.0641066		0.00857628
	G	116	0	0	0
	A	117	0	0	0
	G	118	0	0	0
	A	119	2	2	0
	A	120	1	1	0
	G	121	0	0	0
	A	122	0	0	0
	A	123	0	0	0
	A	124	1	1	0
	A	125	0	0	0
	G	126	0	0	0
	A	127	0	0	0
	C	128	1	1	0
	A	129	0	0	0
	A	130	0	0	0
	A	131	0	0	0
	A	132	1	1	0
	A	133	0	0	0
	G	134	0	0	0
	A	135	2	2	0
	A	136	0	0	0
	A	137	1	1	0
	A	138	0	0	0
