# Supplementary material
Source: HighWire-hosted journal article supplement (doi:10.1101/rna.076513.120)
Supplement: Supplemental_Table_S5.xlsx [file Supplemental_Table_S5.xlsx]

## Sheet: RPS12, RESC6-IPs upon RNAi
Supplementary Fig. S5A. COR and INC values at RPS12 positions T-str 136, 142, 146.
Notes: Most common (+2U) and second most common (+1U) incorrectly edited sequences at T-str 142. Effects of REH2C loss-of-function at position T-str 142.
		KH2F1-RNAi in RESC6-IPs. Mean +/- SD
																					KREH2-RNAi in RESC6-IPs. Mean +/- SD
				Total						Most common incorrectly edited sequence
		T-str	Tet	COR	COR SD	INC	INC SD	Ratio	Ratio SD	INC T#	% of INC	SD	% of Total	SD									Total						Most common incorrectly edited sequence +2U
	nES	136	-	65.1579	2.03215	34.8421	2.03215	0.53548	0.0478888	1	98.5611	0.219003	34.5342	2.06441							Site (T-str)	Tet	COR	COR SD	INC	INC SD	Ratio	Ratio SD	INC T#	% of INC	SD	% of Total	SD
	nES	142	-	62.1601	1.94701	37.8399	1.94701	0.609538	0.0504149	2	92.4598	0.653251	35.2366	1.99175							136	-	66.0885	0.451841	33.9115	0.451841	0.51315	0.0103945	1	98.1696	0.0432972	33.3043	0.539387
	ES6d	146	-	72.0586	1.75292	24.8719	2.0659	0.345613	0.0370772	0	81.6069	1.83287	20.4408	2.06812							142	-	64.949	0.0579828	35.051	0.0579828	0.53965	0.0013435	2	92.5181	0.488499	32.4953	0.326304
																					146	-	71.87	0.391737	25.157	0.554372	0.3501	0.00961665	0	84.7947	0.980421	21.3862	0.801477
				Total						Most common incorrectly edited sequence					Second most common incorrectly edited sequence
		T-str	Tet	COR	COR SD	INC	INC SD	Ratio	Ratio SD	INC T#	% of INC	SD	% of Total	SD	INC T#	% of INC	SD	% of Total	SD				Total						Most common incorrectly edited sequence +2					Second most common incorrectly edited sequence +1U
		142	-	62.1601	1.94701	37.8399	1.94701	0.609538	0.0504149	2	92.4598	0.653251	35.2366	1.99175	1	7.06043	0.56646	2.68493	0.0827539		Site (T-str)	Tet	COR	COR SD	INC	INC SD	Ratio	Ratio SD	INC T#	% of INC	SD	% of Total	SD	INC T#	% of INC	SD	% of Total	SD
		142	d3	59.5959	0.61661	40.4041	0.531335	0.655484	0.0145613	2	94.8003	0.0772409	38.5291	0.450863	1	4.97313	0.051659	2.02107	0.00100967		142	-	64.949	0.0579828	35.051	0.0579828	0.53965	0.0013435	2	92.5181	0.488499	32.4953	0.326304	1	6.98864	0.377178	2.45429	0.120787
		142	d4	56.9899	0.236185	43.0101	0.236185	0.754711	0.00727208	2	94.4992	0.00982243	40.7176	0.138908	1	5.30822	0.000711651	2.28719	0.00834712		142	d3	62.379	0.91641	37.621	2.24648	0.58025	0.0560736	2	93.4912	0.488297	35.3373	0.933988	1	6.09976	0.505055	2.3034	0.141991
																					142	d4	55.661	0.519016	44.339	0.519016	0.79665	0.0167584	2	94.005	0.39476	41.8241	0.698688	1	5.6659	0.432696	2.51956	0.160981
					% of Incorrect				% of Total
		T-str	Tet	T's	R1	R2	AVERAGE	SD	R1	R2	AVERAGE	SD												% of Incorrect				% of Total
		136	-	1	98.4062	98.7159	98.5611	0.219003	33.0744	35.9939	34.5342	2.06441										Tet	T's	R1	R2	AVERAGE	SD	R1	R2	AVERAGE	SD
		142	-	2	91.9979	92.9218	92.4598	0.653251	33.8282	36.645	35.2366	1.99175									136	-	1	98.2003	98.139	98.1696	0.0432972	32.9228	33.6857	33.3043	0.539387
		146	-	0	80.3109	82.903	81.6069	1.83287	18.9784	21.9031	20.4408	2.06812									142	-	2	92.1727	92.8635	92.5181	0.488499	32.2646	32.7261	32.4953	0.326304
																					146	-	0	84.1015	85.488	84.7947	0.980421	20.8195	21.953	21.3862	0.801477
		142	-	2	91.9979	92.9218	92.4598	0.653251	33.8282	36.645	35.2366	1.99175
		142	d3	2	94.7457	94.8549	94.8003	0.0772409	38.2102	38.8479	38.5291	0.450863									142	-	2	92.1727	92.8635	92.5181	0.488499	32.2646	32.7261	32.4953	0.326304
		142	d4	2	94.4923	94.5062	94.4992	0.00982243	40.8158	40.6194	40.7176	0.138908									142	d3	2	93.8364	93.1459	93.4912	0.488297	35.9977	34.6768	35.3373	0.933988
																					142	d4	2	93.7259	94.2842	94.005	0.39476	41.33	42.3181	41.8241	0.698688
		142	-	1	7.46098	6.65988	7.06043	0.56646	2.74345	2.62642	2.68493	0.0827539
		142	d3	1	5.00966	4.9366	4.97313	0.051659	2.02036	2.02179	2.02107	0.00100967									142	-	1	7.25535	6.72194	6.98864	0.377178	2.5397	2.36888	2.45429	0.120787
		142	d4	1	5.30872	5.30772	5.30822	0.000711651	2.29309	2.28129	2.28719	0.00834712									142	d3	1	5.74263	6.45689	6.09976	0.505055	2.203	2.4038	2.3034	0.141991
																					142	d4	1	5.97186	5.35994	5.6659	0.432696	2.63339	2.40573	2.51956	0.160981
		TABULATED: position T-str 142. Total INC & T=2							TABULATED: position T-str 142. Percentage of T=1
		H2F1-RNAi in RESC6-IPs							H2F1-RNAi in RESC6-IPs												TABULATED: position T-str 142. Total INC & 2T							TABULATED: position T-str 142. Percentage of 1T
		T-str	Tet	Total INC	Total INC SD	% Total T=2	SD		T-stripped	Tet	% Total T=1	SD									REH2-RNAi in RESC6-IPs							REH2-RNAi in RESC6-IPs
		142	d0	37.8399	1.94701	35.2366	1.99175		142	d0	2.68493	0.0827539									T-str	Tet	% Total INC	Total INC SD	% Total 2T	SD		T-str	Tet	% Total 1T	SD
		142	d3	40.4041	0.531335	38.5291	0.450863		142	d3	2.02107	0.00100967									142	d0	35.051	0.0579828	32.4953	0.326304		142	d0	2.45429	0.120787
		142	d4	43.0101	0.236185	40.7176	0.138908		142	d4	2.28719	0.00834712									142	d3	37.621	2.24648	35.3373	0.933988		142	d3	2.3034	0.141991
																					142	d4	44.339	0.519016	41.8241	0.698688		142	d4	2.51956	0.160981
																SUMMARY: INC at T-str 142. TOTAL, +2U, +1U
																KH2F1-RNAi		KREH2-RNAi
																%
																%
Supplementary Fig. S5B. Fold change values upon REH2C loss-of-function (positions covered by gRNA-1 and gRNA-2).
Notes: See the suplementary table legend for additional details.
						KH2F1-RNAi - 0-4 Day - RESC6-IP										KREH2-RNAi - 0-4 Day - RESC6-IP
			no of Ts present before that position			0 Day TET (J07/J16)			3 Day TET (J08/J17)			4 Day TET (J09/J18)				0 Day TET (J25/J34)			3 Day TET (J26/J35)			4 Day TET (J27/J36)
	sequence	T-stripped	pre-edited	edited	editing events; del = -; ins = +	J07/J16 Ratio	J07/J16 SD	FOLD CHANGE	J08/J17 Ratio	J08/J17 SD	FOLD CHANGE	J09/J18 Ratio	J09/J18 SD	FOLD CHANGE		J25/J34 Ratio	J25/J34 SD	FOLD CHANGE	J26/J35 Ratio	J26/J35 SD	FOLD CHANGE	J27/J36 Ratio	J27/J36 SD	FOLD CHANGE
ES11d	A	135	2	1	-1	0.322077	0.0258641	0.601474	0.259423	0.0131352	0.488377	0.294906	0.00922609	0.516725		0.351611	0.0098125	0.685189	0.29541	0.0097005	0.549447	0.375928	0.00915566	0.565151
	A	136	0	0	0	0.53548	0.0338625	1.99679	0.531194	0.0085965	2.71628	0.570721	0.0101333	2.76049		0.513159	0.00731799	1.67108	0.537649	0.0178345	2.19132	0.665182	0.0289114	2.31737
	A	137	0	0	0	0.268171	0.0241367	1.02499	0.195559	0.00944137	1.08512	0.206747	0.0121678	1.07055		0.307082	0.00936802	1.0989	0.245354	0.00962799	1.17665	0.287042	0.01898	1.1756
	G	138	0	0	0	0.261634	0.0223142	88.7459	0.180219	0.00859077	79.892	0.193122	0.0112576	135.269		0.279445	0.00906035	85.5722	0.20852	0.0094415	74.6782	0.244167	0.0167547	70.4379
ES10i	A	139	0	1	1	0.00294812	3.06598e-05	0.0135069	0.00225578	0.000430804	0.00765015	0.00142769	7.70947e-05	0.00452006		0.00326561	7.09198e-05	0.0198723	0.00279225	0.000172523	0.0119067	0.00346641	1.52371e-05	0.0121168
ES9i	A	140	0	2	2	0.218268	0.00172398	0.732747	0.294868	0.00408816	0.813515	0.315856	0.0117699	0.797952		0.164329	0.00723368	0.75095	0.234511	0.000845228	0.806435	0.286082	0.00601126	0.777601
ES8i	A	141	0	1	1	0.297876	0.00255307	0.488691	0.362461	0.000162352	0.534559	0.395833	0.00996601	0.524483		0.218829	0.00612048	0.405485	0.2908	0.00354465	0.482035	0.367903	0.00350016	0.461808
	C	142	0	0	0	0.609538	0.0356487	566.194	0.678057	0.0122768	1137.57	0.754711	0.00514214	862.541		0.539672	0.00097351	681.572	0.603276	0.0166512	1007.44	0.796658	0.0118446	1151.9
	A	143	0	0	0	0.00107655	0.000141176	1.04809	0.000596056	7.91632e-05	1.96816	0.000874985	8.78627e-05	3.16317		0.000791804	0.000123132	2.07785	0.000598819	0.0001121	1.87253	0.000691601	9.92094e-05	2.2336
ES7d	C	144	1	0	-1	0.00102716	0.000216028	0.419801	0.00030285	0.000109781	0.257098	0.000276617	3.55903e-05	0.283048		0.00038107	6.25704e-06	0.167141	0.000319792	7.48409e-05	0.19758	0.000309634	9.44604e-05	0.210334
	G	145	0	0	0	0.00244678	0.000166278	0.00707954	0.00117796	0.000185914	0.00575999	0.00097728	3.25839e-05	0.0046301		0.00227993	0.000271221	0.00651292	0.00161855	0.000226664	0.00674001	0.00147211	0.00011076	0.00537311
ES6d	A	146	3	1	-2	0.345613	0.0262176	66.9831	0.204507	0.0100307	31.9364	0.211071	0.0137913	27.4855		0.350062	0.00680932	83.8934	0.240141	0.0096597	38.1587	0.273977	0.00716723	37.3179
ES5i	G	147	0	2	2	0.0051597	0.00077735	10.5505	0.00640356	0.000159356	20.229	0.00767935	0.000108511	23.6216		0.0041727	7.97125e-06	10.7712	0.00629321	0.000701145	35.6358	0.00734172	0.000558756	11.5749
ES4i	A	148	0	1	1	0.000489049	0.000143133	0.705352	0.000316554	7.47507e-05	0.672982	0.000325098	3.67616e-05	0.743692		0.000387395	3.33361e-05	0.655067	0.000176598	3.9657e-05	0.389033	0.000634279	0.000229093	1.12381
	A	149	0	0	0	0.00069334	2.14272e-06	1.0814	0.000470374	0.000141504	0.731446	0.000437141	0.000102765	0.795981		0.000591383	5.13703e-05	0.889145	0.000453941	3.2778e-05	0.51939	0.000564402	5.98173e-05	0.78597
	G	150	0	0	0	0.000641148	5.00493e-05	0.751798	0.000643075	3.21442e-05	0.856371	0.000549185	3.76966e-05	0.663176		0.000665114	0.000150829	0.654103	0.000873989	7.4128e-05	1.3931	0.000718097	9.38768e-05	0.752183
ES3i	A	151	0	2	2	0.00085282	0.000107385		0.00075093	0.000108463		0.000828114	0.000191931			0.00101683	4.51944e-05		0.00062737	9.57236e-06		0.000954684	1.94799e-05
